# Supplementary material for: Intragenic repeat expansions control yeast chronological aging
Source: bioRxiv preprint, doi:10.1101/653006, version 2 (2019-06-22)
Supplement: Supplemental Table 5 [file 653006_file07.xlsx]

## Sheet: Raw data
Table S5 - RNAseq Raw Data - HPF1 reciprocal hemizygote strains
gene_id	gene_name	NAΔxWA_SDC_Exp_Rep1	NAxWAΔ_SDC_Exp_Rep1	NAΔxWA_SDC_Exp_Rep2	NAxWAΔ_SDC_Exp_Rep2	NAΔxWA_RM_Exp_Rep1	NAxWAΔ_RM_Exp_Rep1	NAΔxWA_RM_Exp_Rep2	NAxWAΔ_RM_Exp_Rep2	NAΔxWA_SDC_D7_Rep1	NAxWAΔ_SDC_D7_Rep1	NAΔxWA_SDC_D7_Rep2	NAxWAΔ_SDC_D7_Rep2	NAΔxWA_RM_D7_Rep1	NAxWAΔ_RM_D7_Rep1	NAΔxWA_RM_D7_Rep2	NAxWAΔ_RM_D7_Rep2
YAL001C	TFC3	19.7541	20.3769	21.1638	15.1904	18.7115	19.076	16.0246	16.441	11.3014	15.4645	13.2459	15.4215	12.8022	12.4676	12.8902	11.3109
YAL002W	VPS8	11.5186	12.1437	13.9967	10.5444	11.8646	13.1749	10.474	9.51483	3.518	4.8928	3.5865	4.72507	3.26532	3.41624	3.55962	3.26157
YAL003W	EFB1	475.157	319.341	347.384	922.323	357.986	440.342	612.978	535.857	487.819	468.833	549.419	493.065	322.279	297.263	337.4	319.039
YAL004W	YAL004W	0	0	0	0	0	0	0	0	0	0	0	0	0	0	0	0
YAL005C	SSA1	861.737	501.876	450.516	1552.72	540.533	490.433	913.691	990.608	2917.22	2257.53	2866.91	2258.38	1954.67	1462.04	1927.18	1456.73
YAL007C	ERP2	137.798	132.922	131.644	128.284	129.751	130.062	115.162	133.317	4.02371	4.03078	3.70039	3.69996	1.63391	2.09049	1.99856	1.97399
YAL008W	FUN14	47.4025	69.32	70.9059	34.438	52.2047	76.6179	36.9199	44.3542	28.5922	35.0635	29.0083	39.6667	40.5433	43.5372	35.6769	43.5818
YAL009W	SPO7	24.3772	34.6951	33.3745	22.1151	28.4935	36.3046	23.1388	24.5811	3.4822	6.47444	4.59458	6.05217	4.82177	5.28234	4.78897	5.04835
YAL010C	MDM10	12.0998	12.9545	13.9123	10.7832	12.937	11.3294	10.4832	11.7529	0.709515	1.06507	0.87334	0.759579	0.773547	0.708458	0.718948	0.585672
YAL011W	SWC3	26.5927	36.7979	34.3642	25.9539	32.9853	37.7402	23.3781	27.1667	19.9465	35.4808	19.9788	31.3366	27.0451	24.7031	22.2234	21.8982
YAL012W	CYS3	245.178	121.238	190.646	178.398	194.068	245.886	209.801	128.99	84.5228	125.609	86.8912	110.881	64.0259	60.5832	61.8312	57.8881
YAL013W	DEP1	52.0062	64.299	67.4665	41.6453	59.92	59.6978	42.759	45.0836	26.663	48.1529	26.5345	41.7575	34.6214	33.6165	31.8328	30.4633
YAL014C	SYN8	53.7252	60.8557	60.5153	48.279	58.9614	60.9209	50.3986	48.518	17.9813	31.3284	19.3285	31.9837	24.0057	25.1393	21.7556	25.9078
YAL015C	NTG1	24.1492	28.1289	26.7737	20.7863	25.209	25.8194	19.561	22.1187	11.3055	15.7382	10.2239	14.5089	13.0474	12.6589	10.2946	9.97686
YAL016C-A	YAL016C-A	60.1454	69.0891	74.3826	46.379	65.7378	53.0059	52.3842	54.8301	14.8878	19.1894	16.6705	21.0548	21.3725	21.4797	26.6877	22.4468
YAL016C-B	YAL016C-B	45.3637	61.9383	47.3035	27.2292	42.2969	60.3972	39.7631	44.5238	3.9204	15.2343	7.64903	19.5781	15.8573	15.8217	10.9448	11.6472
YAL016W	TPD3	81.7461	94.3465	100.915	61.7387	93.038	92.3026	68.9043	70.117	15.8401	23.2119	19.1254	24.9687	24.9152	25.2589	23.6017	25.7772
YAL017W	PSK1	34.9371	39.563	42.7935	25.0638	37.0768	35.7281	29.0955	29.4333	21.8796	34.0204	26.4068	36.9587	41.2073	37.1097	37.3206	38.9301
YAL018C	LDS1	0.433631	0.202702	0.389495	0.203739	0.431639	0.260784	0.316032	0.303928	0.723504	0.656444	0.639135	0.634606	0.3023	0.363871	0.332952	0.369134
YAL019W	FUN30	6.10076	5.18715	6.51153	7.06531	5.92093	7.72103	7.16555	6.2829	0.763279	1.00386	1.01902	0.939498	1.54476	1.15071	1.3023	1.02467
YAL019W-A	YAL019W-A	1.93185	3.82473	4.3226	0.921856	2.63212	3.17155	1.21761	2.21281	0.197451	0.561987	0.290725	0.312697	0.372811	1.55838	0.442318	0.66479
YAL020C	ATS1	24.5502	38.9332	37.3215	24.0673	34.3645	47.4381	24.3755	26.6606	2.44403	3.21438	2.44342	3.23875	4.47568	4.94644	4.67746	5.20889
YAL021C	CCR4	20.8699	26.3437	30.2634	17.5893	24.5074	32.3486	19.7794	18.0279	1.94722	1.67919	2.17171	1.60128	3.11192	2.47379	3.24494	2.70084
YAL022C	FUN26	15.533	22.0167	23.2301	14.3001	21.1972	26.6329	14.297	14.7646	1.60476	2.15219	1.71656	2.31177	3.46508	2.61535	3.22565	2.58317
YAL023C	PMT2	69.4086	70.895	73.9456	78.1735	71.9473	82.7606	60.2446	64.5456	4.88087	4.82778	5.36134	4.54882	4.96803	3.3894	4.59511	3.37947
YAL024C	LTE1	1.66418	1.55426	1.87266	1.44443	1.65729	2.76911	1.8712	1.43108	0.106159	0.0847598	0.196106	0.132521	0.156964	0.110144	0.163139	0.124917
YAL025C	MAK16	27.6461	30.8851	30.019	51.6965	34.727	50.3654	48.662	45.479	3.02467	2.29373	3.34454	1.98309	3.15769	1.65349	2.66335	1.21261
YAL026C	DRS2	12.0549	11.9328	14.3152	9.8319	12.6362	14.3646	11.2199	9.79677	0.681794	0.81895	0.740518	0.732848	1.22593	0.845953	0.966896	0.948076
YAL026C-A	YAL026C-A	35.5318	42.0045	34.7796	29.4345	31.8734	39.2368	33.9332	34.3022	1.40866	2.2952	2.06543	2.49965	1.72922	2.38962	1.91473	2.1319
YAL027W	SAW1	22.2515	22.1945	23.2204	18.632	23.5016	18.592	19.435	19.5384	2.57868	3.05463	2.84271	3.58536	3.63592	4.01598	3.99786	4.17385
YAL028W	FRT2	42.6475	47.6762	44.7108	27.2519	44.0639	36.7041	32.2294	33.5697	9.54544	11.5335	9.3991	12.4597	9.35126	8.8595	9.47596	8.47613
YAL029C	MYO4	13.2568	14.7614	15.845	12.9945	13.9431	19.3556	12.7944	11.7373	0.677193	0.794608	0.843566	0.691363	0.686332	0.532867	0.707519	0.545979
YAL030W	SNC1	213.966	303.24	276.424	158.013	269.571	317.333	181.769	216.084	63.8629	104.183	67.6706	116.207	106.552	112.59	115.404	125.669
YAL031C	GIP4	20.8106	21.7971	23.4596	15.4014	20.8978	18.1591	18.0225	17.4859	6.18201	10.1235	6.1529	10.6489	9.59298	9.81216	9.17475	10.6054
YAL031W-A	YAL031W-A	32.9717	34.3868	36.2622	20.9877	28.8883	36.5768	24.6345	25.1039	8.54855	15.9324	10.0002	18.2301	11.2952	17.5899	9.49311	15.2708
YAL032C	PRP45	28.8191	34.5962	33.3235	22.5155	30.7482	31.6623	23.738	24.662	12.2775	22.4888	13.4029	23.0591	25.3034	22.1105	22.569	21.9348
YAL033W	POP5	18.5677	19.564	21.1716	19.6246	20.8844	24.0122	19.9485	19.952	0.826871	1.34792	1.10483	1.12503	1.03034	0.745473	0.379389	0.581046
YAL034C	FUN19	123.581	101.29	96.4349	89.9365	95.3316	71.1527	90.5768	101.779	97.4354	102.1	101.63	113.424	148.66	134.551	145.516	141.466
YAL034C-B	YAL034C-B	5.95419	6.59996	6.59564	7.7218	7.9065	9.21312	8.08728	6.27957	0.209158	0.595819	0.366183	0.414433	0.632085	0.435045	0.654733	0.584117
YAL034W-A	MTW1	11.1072	9.9603	9.50778	10.5593	9.69764	6.86701	10.6746	9.6415	0.702011	0.614758	0.797193	0.663017	0.622377	0.420288	0.732767	0.538439
YAL035W	FUN12	184.967	203.315	187.536	233.999	210.15	219.89	205.826	204.869	12.0525	19.1034	14.5047	18.9611	17.9071	16.8403	16.6677	15.7946
YAL036C	RBG1	19.6714	19.3201	19.692	27.2401	21.3378	31.7227	25.9266	25.2424	3.43577	5.26165	4.54547	4.60781	6.33595	5.50499	5.78134	5.77598
YAL037C-A	YAL037C-A	40.1263	40.1493	24.1755	31.1055	42.758	25.81	39.0354	29.1759	0	0	0	0	0	0	1.03268	0
YAL037C-B	YAL037C-B	1038.52	793.542	860.892	1294.46	871.363	805.649	1174.42	947.191	17.051	17.5244	18.4266	17.5351	4.97014	5.56095	4.22199	5.05437
YAL037W	YAL037W	9.69194	10.5572	9.28766	13.073	10.6446	10.4773	11.1086	8.78502	0.628272	0.52153	0.373942	0.58002	0.796386	0.722213	0.90056	0.842469
YAL038W	CDC19	1233.47	911.763	1024.22	1505.12	987.563	843.732	1124.39	1127.81	3.71007	2.48206	3.56652	2.68983	2.08303	1.7485	2.43713	2.10351
YAL039C	CYC3	104.2	141.427	128.311	96.8572	127.007	149.736	89.8917	102.069	158.629	204.38	181.716	232.203	394.523	329.01	369.042	377.14
YAL040C	CLN3	35.8986	27.7433	28.7458	36.9523	27.7482	30.536	32.9723	29.5297	3.23872	2.13833	3.87431	1.87153	2.67186	1.89629	2.53903	2.24247
YAL041W	CDC24	27.8793	29.6909	30.1628	22.6522	28.379	31.8762	22.8769	23.4775	2.64477	4.40137	3.59118	4.50677	3.46316	3.37313	3.23228	3.27138
YAL042C-A	YAL042C-A	22.4953	21.4836	25.1551	15.9062	25.2091	24.9305	17.1236	19.8222	5.7157	5.37061	6.1556	6.14433	5.08561	6.05529	5.97666	5.49476
YAL042W	ERV46	95.5653	111.093	112.956	93.4862	107.575	118.493	86.6832	88.5113	18.0223	25.1478	19.7344	24.7728	17.2234	17.2709	16.5339	16.8708
YAL043C	PTA1	37.2172	35.7754	38.3081	29.7186	37.2386	32.3246	28.9718	30.5646	6.81728	10.2652	7.34981	7.89834	7.87621	7.75031	7.17531	6.58221
YAL044C	GCV3	331.616	385.579	388.423	423.423	383.938	296.46	382.261	355.854	130.374	294.181	138.49	340.472	316.538	424.967	349.191	539.734
YAL044W-A	YAL044W-A	65.8705	84.8295	92.693	51.0842	80.699	99.3644	60.5307	65.7101	28.3232	39.6865	30.7117	38.8804	57.3565	59.47	60.4668	60.1503
YAL045C	YAL045C	9.27239	17.1532	10.7723	8.12924	14.2756	13.6772	8.37195	11.1642	3.38463	2.13196	2.6961	4.8998	8.25214	6.75725	4.83278	5.39683
YAL046C	AIM1	80.1609	99.4698	103.752	74.2137	91.9156	106.804	70.0566	81.3094	16.4268	31.0439	16.8924	35.0475	36.3191	35.5175	35.4156	42.6091
YAL047C	SPC72	6.57227	6.01479	6.55659	6.18334	6.19181	5.81246	5.8912	6.129	0.587233	1.03925	0.674694	0.975557	1.18567	1.00718	1.15077	0.98723
YAL047W-A	YAL047W-A	2.76461	0.823125	1.90963	0.45782	1.86754	1.9151	2.72061	1.42043	0	0	0	0.142298	0.29297	0.144696	0.137507	0.157075
YAL048C	GEM1	14.5608	13.952	14.3839	10.7049	13.0111	11.7372	11.7579	12.1556	1.77725	2.57401	1.96759	2.5881	4.05639	3.56117	3.74967	3.40665
YAL049C	AIM2	95.6926	120.436	120.795	85.0153	109.84	127.451	83.5877	84.1947	18.4102	18.7372	18.9691	17.9831	42.5512	41.5232	39.4713	42.4402
YAL051W	OAF1	14.1227	15.6608	16.7014	11.6687	15.5195	15.2259	12.4533	12.7981	5.80434	10.9431	7.44078	11.3383	15.6683	14.2682	15.1689	15.6355
YAL053W	FLC2	54.08	41.5242	48.7642	44.1999	48.2644	55.3846	43.6503	45.0078	20.0812	47.0419	23.2251	41.556	61.6398	59.5155	58.302	57.6505
YAL054C	ACS1	46.9367	31.9247	28.9976	39.5528	34.1091	14.7652	31.344	35.5172	486.168	668.183	583.462	721.512	549.137	532.591	526.293	532.713
YAL055W	PEX22	42.3954	41.4352	35.8656	35.7005	36.6475	30.5488	37.1024	39.2832	31.3764	59.2626	36.0365	56.8156	57.6638	56.6383	54.1535	52.1749
YAL056C-A	YAL056C-A	19.5266	24.3804	20.34	20.6004	21.5445	25.2436	22.045	22.1104	1.27731	4.13711	2.61083	3.91622	3.01663	4.88748	2.02853	4.11689
YAL056W	GPB2	31.9933	37.1938	38.5467	23.2214	35.6106	30.7771	29.0644	27.1555	10.5847	15.5612	11.305	16.0528	23.1745	20.3042	20.4198	19.902
YAL058W	CNE1	10.0363	10.7287	12.2473	9.89636	10.7519	12.4465	9.06459	9.20077	1.89649	2.16293	1.82501	1.87797	2.61481	2.44368	2.4052	2.24145
YAL059C-A	YAL059C-A	0	0	0	0	0	0	0	0	0	0	0	0	0	0	0	0
YAL059W	ECM1	18.1545	15.4012	17.3359	29.3983	17.0335	17.2275	27.4321	24.223	4.89228	6.7044	4.57275	5.87573	8.13932	6.39271	8.71809	5.23115
YAL060W	BDH1	517.479	702.591	702.361	425.151	643.881	575.25	445.408	516.519	831.756	302.186	681.929	325.846	526.338	402.971	480.438	422.186
YAL061W	BDH2	683.588	544.313	410.688	802.97	407.662	278.701	644.034	617.413	617.544	365.025	566.194	374.017	646.503	431.546	596.064	428.864
YAL062W	GDH3	27.7524	41.736	35.3873	21.3435	30.594	36.465	18.6865	24.7061	436.303	303.893	390.936	326.814	309.256	315.595	288.791	329.273
YAL063C	FLO9	14.8912	22.0595	20.4233	11.2932	17.1899	25.7395	11.5713	13.4535	26.0508	14.4262	22.2652	14.6498	15.3271	13.8163	14.387	13.6613
YAL063C-A	YAL063C-A	0.741999	0.760939	0.366726	0.610413	0.555827	0.861809	0.326358	0.802203	0	0.239732	0	0	0	0	0	0
YAL064C-A	TDA8	1.28831	1.23498	1.24803	1.14199	1.03921	1.51031	0.404713	1.1829	0.985108	0.603144	0.775841	1.02568	0.878371	0.153316	0.774265	0.441534
YAL064W	YAL064W	1.85286	2.5303	2.66823	1.26772	0.770466	3.04424	1.35871	0.500635	0.103263	0	0	0.121632	0	0	0.129062	0
YAL064W-B	YAL064W-B	0.818193	0.705464	0.487985	0.688018	0.638343	0.464315	0.642924	0.959354	0.0618609	0.229724	0.261617	0.369921	0.405433	0.15764	0.0799952	0.225548
YAL065C	YAL065C	7.35908	8.33137	9.06958	6.96661	6.8855	8.13325	6.13719	6.88048	2.96264	2.97437	2.93399	2.60205	3.79262	4.76157	3.65131	4.11221
YAL066W	YAL066W	0.398731	0.545511	0.4924	0.273541	0	0.30895	0.146105	0.143314	0	0	0.186501	0	0	0.111113	0.111282	0.106716
YAL067C	SEO1	1.50355	0.952803	1.97888	0.626117	1.08247	2.10976	1.51004	0.743233	0.239304	0.154963	0.320841	0.309396	0.641003	0.505551	0.794551	0.525154
YAL067W-A	YAL067W-A	2.32607	3.12085	4.87731	3.44907	3.85323	4.27505	2.93621	3.63224	0.479489	0.471696	0.334056	1.09395	0.00359192	0.79952	0.528679	1.44842
YAL068C	PAU8	1.20038	1.69324	1.12926	2.67621	2.11399	2.17259	1.43253	1.08251	0.222636	0.0933017	0.0777199	0.0886562	0.189334	0.548919	0.361699	0.519894
YAL068W-A	YAL068W-A	1.57998	3.10203	1.25871	0.629614	2.31809	3.12899	2.16425	2.95697	0.157874	1.03288	0.153957	0.867736	0.169822	0.713209	0.33585	0.174681
YAL069W	YAL069W	2.39042	4.14191	4.75401	3.93518	2.36781	2.84651	2.62553	4.26642	3.24213	3.97847	3.69156	3.97572	1.61277	2.10437	2.86981	3.50203
YAR002C-A	ERP1	170.679	154.435	150.288	176.53	164.371	131.234	155.937	170.771	5.71236	5.27842	7.70371	5.75767	4.39346	4.04445	5.30286	4.58896
YAR002W	NUP60	26.2478	20.6053	21.6539	28.138	23.0694	18.2425	23.1658	22.4828	6.37492	7.30066	6.67952	6.60997	4.86546	4.4861	5.03131	4.20635
YAR003W	SWD1	20.2106	22.8537	23.9678	15.3072	21.2419	22.7184	17.6273	18.0851	1.93858	1.79491	1.73509	1.72011	2.32901	2.07054	2.37906	2.04728
YAR007C	RFA1	18.5516	17.2793	20.702	17.514	19.7401	19.5151	19.5267	16.1816	8.68288	11.7564	11.6796	12.2492	9.79124	8.62908	9.89821	8.46639
YAR008W	SEN34	6.57898	5.69284	7.03276	7.40834	7.19123	5.86612	8.10463	5.68058	3.30965	4.62509	4.19705	5.63935	3.62629	3.50351	3.75239	3.38979
YAR009C	YAR009C	0.0389356	0.0481367	0.0523749	0.0473924	0.059711	0.107481	0.0447035	0	0	0	0	0	0	0	0.037003	0
YAR010C	YAR010C	2.32535	2.05672	2.42548	1.78535	1.51397	1.80409	1.29487	1.57905	0.640939	0.700977	0.862497	1.00281	1.70313	1.06012	1.57945	1.45439
YAR014C	BUD14	12.565	16.7915	18.4272	11.1417	15.5817	20.8766	13.508	11.3085	8.27477	21.0214	9.54485	23.2385	12.4556	16.0683	14.219	17.4643
YAR015W	ADE1	92.7932	104.132	98.4403	199.608	101.262	68.1616	151.402	143.694	132.484	292.693	150.616	375.508	181.683	285.444	233.994	369.74
YAR018C	KIN3	9.79597	11.7856	13.0058	12.0678	11.1247	13.5515	10.9611	10.6159	0.525739	0.817884	0.417366	0.945619	0.445591	0.430058	0.414257	0.289454
YAR019C	CDC15	12.7556	14.9748	15.4748	8.9754	14.2016	13.0577	12.3689	11.3503	5.28388	10.3492	6.34434	10.5111	11.2494	10.0196	9.4547	10.1549
YAR019W-A	YAR019W-A	3.79591	3.18934	2.51818	1.32045	2.01653	1.9467	1.98751	2.01726	1.64459	1.72716	1.41425	3.23321	2.32664	2.89964	1.64567	1.62026
YAR020C	PAU7	4.8734	5.80748	10.378	4.91528	4.88636	8.60702	6.75657	8.65952	1.21533	1.06913	2.21702	3.15214	0.755742	1.14138	1.49996	0.743988
YAR023C	YAR023C	37.9148	37.0728	37.9957	32.3809	34.3239	36.9029	31.5877	35.2761	20.8589	33.0768	22.5398	32.533	18.736	21.812	20.2277	22.3235
YAR027W	UIP3	59.3152	70.0328	72.1231	45.0881	64.8268	60.9019	52.4911	55.0515	11.2477	10.4258	10.4134	9.69953	25.231	21.9976	20.8911	20.4525
YAR028W	YAR028W	23.3054	19.7389	20.1723	23.5923	20.4735	20.3119	22.5558	20.2423	2.55479	1.32585	1.79735	1.64046	3.44342	2.69255	3.13543	2.52689
YAR029W	YAR029W	82.2173	112.491	102.755	66.8542	87.8593	105.209	70.4937	76.8811	7.71937	10.377	7.72817	10.3168	17.8639	14.7936	17.3003	15.113
YAR030C	YAR030C	34.343	49.6099	47.4679	29.0285	39.1859	51.1607	29.5019	32.5511	4.37053	6.22576	4.73888	5.27349	8.9049	7.02643	8.65327	7.18689
YAR031W	PRM9	6.71328	7.75337	8.89546	4.98684	6.75194	8.98844	5.56111	5.839	0.870504	0.686197	0.830619	0.949546	1.09765	1.05601	1.27692	1.09978
YAR033W	MST28	18.8339	22.9521	22.5572	16.2662	20.0284	21.5645	14.9724	17.7546	2.06616	1.72861	2.22632	1.26438	2.52141	1.72656	1.92307	2.30111
YAR035C-A	YAR035C-A	3.71929	5.29224	11.3211	0	11.335	5.95322	6.45304	0	78.4486	65.5053	77.4638	53.0303	121.729	68.5226	96.0703	53.5721
YAR035W	YAT1	4.11308	4.55227	5.08966	2.34943	4.94919	4.03818	3.76323	2.76297	82.952	73.4622	85.4164	66.0593	177.835	96.412	173.634	92.1386
YAR042W	SWH1	17.9831	24.4495	28.2734	15.9131	23.2113	30.2569	17.7337	17.0391	24.0621	27.1779	24.7047	26.674	36.6423	31.1858	35.3512	31.3591
YAR047C	YAR047C	0	0	0	0	0	0	0	0	0	0	0	0	0	0	0	0
YAR050W	FLO1	6.1219	7.60529	6.30511	5.00413	5.832	7.44964	3.82737	5.09164	4.5486	2.78205	3.92883	2.51684	3.40883	2.46145	3.05918	2.72579
YAR053W	YAR053W	0.857782	1.02564	3.00118	1.61668	1.07116	0.663678	1.7296	1.38995	0.191054	0.11552	0	0	0	0.119677	0.11951	0.229621
YAR060C	YAR060C	0.228653	0.117568	0.282263	0.412648	0.0715449	0.199814	0.251498	0.184401	0	0.139524	0.0400766	0	0	0.0477283	0	0.0457972
YAR061W	YAR061W	0.708631	0.851724	0.701928	0.544935	0.914977	0.759962	1.13286	0.542186	0.423371	0.0988051	0.171175	0.632172	0.816713	0.755678	0.702308	0.497781
YAR064W	YAR064W	0	0	0	0	0	0	0	0	0	0	0	0	0	0	0	0
YAR066W	YAR066W	0	0	0	1.72273e-09	0	1.17941	0	0	0.000294313	0	4.41734e-06	0	4.78553	0.648925	0.0145565	0.854102
YAR068W	YAR068W	16.6868	17.1955	16.9861	16.0134	13.4471	16.4876	19.3294	13.8834	2.13746	0.464858	1.32179	1.05195	0.872908	1.40209	0.606583	0.895931
YAR069C	YAR069C	0.0728466	0.14931	0.359822	0.0748747	0.181857	0.338168	0.480461	0.236156	0.0973405	0.11765	0	0.0574348	0.187913	0.121926	0.182675	0.117037
YAR070C	YAR070C	0	0	0	0	0	0	0	0	0	0.0567603	0	0	0	0	0	0
YAR071W	PHO11	8.0435	8.28763	10.0292	5.76304	7.35888	7.90329	5.60744	5.97122	0.771004	0.98374	0.788656	1.12793	1.19116	1.14146	1.3297	1.39147
YAR073W	IMD1	1.30065	0.880162	1.35496	1.23114	0.815861	0.57613	0.920397	0.862223	0.295251	0.38951	0.161058	0.354142	0.473683	0.563235	0.58837	0.538146
YAR075W	YAR075W	0	0	0.0886178	0	0	0	0	0	0	0	0	0	0	0	0	0
YBL001C	ECM15	289.672	373.261	356.357	222.624	325.338	384.79	249.995	269.674	130.131	188.807	158.081	214.402	204.914	230.608	203.156	256.966
YBL002W	HTB2	984.126	624.824	774.097	856.392	749.454	422.649	1059.73	853.371	17.7856	21.3946	17.0392	20.3491	14.6158	14.2304	13.1427	13.9342
YBL003C	HTA2	790.649	637.004	846.728	730.252	764.763	665.194	981.002	752.423	2.23549	3.12367	3.02803	3.78056	2.65019	2.44285	2.02639	2.3439
YBL004W	UTP20	5.18175	5.23017	5.08606	8.4012	5.57681	8.55419	7.12061	7.10272	1.06522	2.29742	1.37229	2.21171	2.85639	2.04065	2.466	1.99609
YBL005W	PDR3	12.9921	9.50262	9.67344	22.9873	9.58188	9.64911	17.127	11.0334	7.2978	14.281	10.2484	16.7171	10.718	11.3655	10.4172	12.0078
YBL005W-A	YBL005W-A	7.08618	8.04869	9.54346	7.93183	8.34766	10.4954	7.92261	7.26632	1.37365	1.73653	1.62744	1.78655	1.69222	1.60047	1.74717	1.93244
YBL005W-B	YBL005W-B	0	0.203808	0.152228	0.0480727	0	0.177891	0.0899982	0	0.060813	0	9.07252e-09	0.0732167	0.0687715	0	0	0.0259864
YBL006C	LDB7	89.1039	102.437	98.3537	91.8642	93.6844	100.767	86.4952	89.0567	41.9535	65.5447	50.4586	71.3597	79.3572	68.907	79.4609	72.4628
YBL006W-A	YBL006W-A	0	0	0	0	0	0	0	0	0	0	0	0	0	0	0	0
YBL007C	SLA1	64.2001	70.421	83.969	51.5548	74.8381	74.728	55.6254	52.1656	33.2375	40.6202	38.418	42.1363	36.6908	30.8473	36.4276	31.8138
YBL008W	HIR1	4.15633	4.72634	5.35819	3.73909	5.21334	6.29341	4.06821	3.42642	1.24983	2.67221	1.42642	2.62896	2.89884	2.65813	2.63048	2.80371
YBL008W-A	YBL008W-A	1.51103	0.65917	1.06575	0.219013	0.536074	0.24764	0.711204	1.16819	0	0	0	0	0.183233	0.360963	0	0.173967
YBL009W	ALK2	7.18537	4.90809	5.41374	7.35028	5.63972	3.54239	7.45595	6.33312	1.35829	1.91622	1.87065	1.84242	3.62502	2.32901	2.9984	2.13928
YBL010C	YBL010C	12.6592	12.3791	11.7349	10.3611	13.2853	14.0096	12.7381	11.5607	1.18394	1.10621	1.55449	1.23609	1.55308	1.16596	1.6474	0.886842
YBL011W	SCT1	36.5391	46.6388	44.7714	31.0678	41.125	48.8321	30.7634	33.0776	58.1899	87.2332	62.3973	87.1891	69.875	67.5479	68.4676	67.879
YBL012C	YBL012C	20.0242	21.477	23.9946	17.0131	23.1862	20.8337	15.5588	17.1581	43.7384	51.2811	43.6285	58.2596	44.2737	41.8688	47.4303	43.1298
YBL013W	FMT1	7.24005	7.72773	7.58854	5.46458	7.8653	6.4006	6.22953	6.04356	12.0357	15.0064	12.3218	14.8438	10.6612	11.0102	11.8111	12.0693
YBL014C	RRN6	10.4397	11.1486	10.8608	10.2904	9.70578	11.3104	9.37457	9.66216	5.43949	8.21155	6.43404	8.25145	5.28569	5.13525	5.19084	4.95932
YBL015W	ACH1	109.762	161.415	155.792	66.8208	140.12	103.949	95.06	98.1588	558.126	380.847	571.272	429.514	452.994	331.995	445.062	342.012
YBL016W	FUS3	1.65725	2.22643	1.98054	1.24596	1.14518	1.65414	1.21543	1.46615	4.8568	5.67256	5.212	5.95058	4.87379	4.74074	4.03562	4.41612
YBL017C	PEP1	24.3942	32.3064	35.9335	20.5075	29.4239	35.6088	21.4034	22.5618	4.18594	3.19472	4.5313	3.74155	4.80993	4.22047	4.9268	4.4316
YBL018C	POP8	22.8701	23.4762	26.6595	24.1369	29.4674	28.448	30.4692	25.7307	3.94374	8.22613	5.26459	11.9441	10.9738	11.8502	10.2023	13.0532
YBL019W	APN2	12.9251	18.1112	17.7176	10.2308	15.3166	18.1121	11.6948	12.8878	1.35573	1.64857	1.41455	1.51203	2.19886	2.16534	2.08014	2.26253
YBL020W	RFT1	16.387	17.6077	18.5105	12.1861	16.4311	17.1035	13.7373	13.0235	3.43869	7.04568	4.35055	7.1069	4.41436	4.38168	4.2264	4.07315
YBL021C	HAP3	38.3317	47.3553	46.2535	33.3413	41.7615	44.0602	36.6942	38.5098	23.7676	44.0705	30.1473	41.8967	35.3755	32.6235	31.4792	35.7327
YBL022C	PIM1	32.417	52.9857	54.4159	25.6583	45.2967	70.0577	26.3097	30.1918	15.8591	26.0209	20.4076	31.2602	19.0294	20.6189	19.2477	22.6171
YBL023C	MCM2	8.75642	8.93363	10.297	7.26287	10.0674	10.6608	8.09774	7.63765	1.43066	1.38944	1.47486	1.40151	1.87092	1.26982	1.57795	1.17667
YBL024W	NCL1	15.9657	13.5482	15.2523	23.3113	16.2278	20.0631	20.3987	17.0557	1.06575	1.1051	1.37959	1.18707	1.04117	0.648299	1.00167	0.532159
YBL025W	RRN10	23.8556	24.4089	25.2691	20.2878	24.1959	22.1368	23.0451	24.266	23.4605	29.0605	27.0403	33.4942	15.7737	19.2134	16.7448	20.4243
YBL026W	LSM2	162.044	169.584	168.966	145.654	162.038	192.547	164.915	177.214	16.8061	56.9402	23.5636	73.589	39.704	56.3602	32.7761	54.5173
YBL027W	RPL19B	1145.11	1075.31	1164.26	1442.88	1236.08	1297.1	1412.26	1256.26	33.2645	43.616	41.4403	45.8741	25.9693	25.0464	26.6063	23.3916
YBL028C	YBL028C	31.3862	21.4092	23.129	68.4599	24.5253	29.7335	67.9376	52.7343	19.2369	29.998	23.65	30.4373	46.6493	34.9288	43.3376	34.2107
YBL029C-A	YBL029C-A	187.757	202.74	199.927	206.322	181.252	194.832	171.367	199.753	57.0014	53.6668	58.789	52.3016	84.6132	78.1376	80.7929	73.1434
YBL029W	YBL029W	10.3173	11.4199	12.1101	13.3872	9.54152	17.5756	10.5664	10.345	14.8679	21.9204	15.388	23.2235	23.7938	28.1103	24.6881	27.431
YBL030C	PET9	317	522.999	590.937	239.676	463.145	591.624	314.361	290.29	415.255	624.31	497.015	674.178	744.772	695.374	710.868	719.943
YBL031W	SHE1	5.99598	5.26943	6.34409	5.70977	5.82386	5.25281	5.09753	4.75633	0.313757	0.62649	0.412021	0.378507	0.206058	0.212085	0.198555	0.259438
YBL032W	HEK2	56.1463	44.7889	51.8336	56.5444	49.375	47.3343	52.7529	46.5074	31.5676	46.6254	35.8128	47.4807	24.4686	26.5395	24.0515	26.9924
YBL033C	RIB1	59.1934	56.2555	57.1051	60.1052	54.8796	48.9413	53.0125	58.36	227.709	272.523	249.322	287.019	196.402	186.767	201.446	194.18
YBL034C	STU1	5.05234	3.84637	4.3895	3.96472	4.22099	4.0604	4.08214	3.71615	1.17226	1.89116	1.44332	1.58275	1.20466	0.971704	1.14267	0.960157
YBL035C	POL12	5.69963	4.51022	5.35763	6.15507	5.59275	4.72132	5.95991	4.45566	0.867402	1.2235	1.09817	1.16534	0.908641	0.920034	1.06454	1.09422
YBL036C	YBL036C	41.2951	44.7313	41.974	40.1744	42.5458	46.6521	38.3285	38.2504	13.3634	23.9907	15.9054	22.621	14.6075	14.7867	13.8139	14.4116
YBL037W	APL3	16.2744	16.9178	19.3644	12.5074	18.1868	20.043	13.7897	14.5582	1.56066	2.84074	1.97212	2.74357	2.82939	2.64858	2.81945	2.69923
YBL038W	MRPL16	75.0048	84.4155	83.7642	64.9713	76.2331	83.8428	61.0041	68.921	110.797	182.019	128.473	178.913	113.527	120.623	104.983	114.054
YBL039C	URA7	14.8465	12.209	12.6686	29.5842	14.5595	20.2119	23.1789	22.0185	3.32115	3.57419	3.94402	3.08417	2.92234	1.89993	3.25229	1.87729
YBL039C-A	YBL039C-A	0	0	0	0	0	0	0	0	0	0	0	0	0	0	0	0
YBL039W-B	YBL039W-B	216.4	215.978	229.736	123.774	219.251	224.295	163.34	185.89	10.7725	24.5938	13.3937	22.4206	25.1929	29.4383	20.7277	25.2987
YBL040C	ERD2	125.963	130.255	127.064	104.098	127.545	131.424	103.681	114.494	5.68528	19.0292	7.10674	15.1911	15.448	16.5789	11.9742	14.1199
YBL041W	PRE7	167.657	187.143	184.515	133.08	178.578	197.8	138.105	150.165	45.2818	71.4516	57.8593	70.5482	43.1861	46.3885	42.5812	44.2964
YBL042C	FUI1	5.57146	7.22045	7.98067	6.96854	6.86619	14.3832	7.08487	6.27382	4.5307	6.45441	5.49611	6.49268	10.3811	8.12949	11.7799	10.0769
YBL043W	ECM13	12.311	13.4872	13.0015	11.7118	11.5434	7.82052	8.48602	8.54929	195.132	208.476	237.565	205.124	264.924	170.642	243.341	162.403
YBL044W	YBL044W	3.79056	4.80961	4.07419	2.60982	4.38441	6.14236	2.45843	4.89859	1.49423	1.27153	1.22829	1.23664	1.17899	0.972096	0.898501	0.932122
YBL045C	COR1	316.871	406.51	445.816	244.92	386.462	378.336	279.223	292.973	317.174	324.289	347.909	362.456	290.109	295.532	291.225	310.528
YBL046W	PSY4	29.0958	28.288	29.5385	24.918	29.0606	23.6205	26.3306	26.2541	8.38458	11.7478	9.13606	11.2134	7.30645	6.85813	7.41372	6.6757
YBL047C	EDE1	65.99	86.0977	91.9557	47.4822	81.4607	93.0342	56.6611	58.1544	38.9266	54.4529	43.6157	57.1198	64.7306	55.7293	60.0383	58.3272
YBL048W	RRT1	25.067	30.8369	24.6702	13.977	19.2766	17.9098	11.7727	21.8172	24.8677	35.5711	27.6555	41.6008	37.5958	38.9902	32.9008	38.1596
YBL049W	MOH1	41.3682	49.6708	47.6479	23.0043	41.591	38.2644	24.2522	33.424	229.466	204.895	232.811	232.314	229.481	241.696	224.915	251.158
YBL050W	SEC17	124.284	146.671	155.401	98.5652	136.902	136.708	104.091	112.468	98.4049	155.518	117.81	160.08	126.817	126.691	117.575	134.18
YBL051C	PIN4	49.6488	46.7676	54.9904	41.7841	50.5517	46.8177	39.6345	43.17	9.58868	12.8805	11.104	12.9421	8.01211	7.89455	8.13975	7.86697
YBL052C	SAS3	6.04608	6.1838	7.36295	5.21081	6.64453	8.17138	5.79912	4.77857	0.779205	1.12662	0.796417	0.909074	1.06476	0.97442	1.04407	0.939411
YBL053W	YBL053W	40.7401	52.9189	42.2994	43.0655	45.4325	57.1563	45.2887	37.7405	3.97045	6.10412	4.21887	5.47054	5.39122	3.928	4.29373	5.18227
YBL054W	TOD6	4.62972	6.8357	6.48947	5.90936	5.22231	9.3095	5.371	5.9198	4.33562	7.03265	5.28041	6.54357	10.7534	8.56888	10.0748	9.32107
YBL055C	YBL055C	34.7243	54.477	50.2205	28.4483	43.7647	68.9446	29.1866	34.9154	6.12736	9.09488	7.08042	7.35642	10.9036	9.62139	10.438	9.32276
YBL056W	PTC3	123.821	159.81	163.038	100.046	144.843	160.568	110.033	120.202	35.9894	67.2843	43.5534	67.5357	61.106	56.1803	55.6148	54.0102
YBL057C	PTH2	68.4669	77.0111	70.4817	68.5176	73.8939	69.0187	63.7021	70.1417	22.4015	37.9152	25.2881	33.693	18.1806	18.9316	17.2671	17.1044
YBL058W	SHP1	119.863	150.263	144.348	105.334	136.135	134.997	99.741	113.069	102.279	131.005	118.01	138.828	112.32	112.666	112.268	117.493
YBL059C-A	CMC2	79.8166	110.07	102.9	75.0549	98.1047	117.977	73.2333	85.7203	45.6599	78.7867	60.4992	89.0552	74.1679	79.6126	67.1144	77.5381
YBL059W	YBL059W	16.1744	19.064	20.5677	14.0549	18.4734	20.8367	16.6374	16.025	6.46477	12.7553	9.55713	15.1604	8.91238	10.4265	7.87899	9.88901
YBL060W	YEL1	7.60204	8.68283	8.75065	6.29778	8.20039	9.42654	6.74478	7.03594	2.65525	5.90408	3.3514	5.43978	5.0609	5.49722	4.94901	4.7501
YBL061C	SKT5	8.83673	11.8286	12.6592	8.19447	11.5069	18.882	9.42562	8.02856	5.94639	12.7941	8.48046	13.0969	12.6164	13.6378	11.8085	12.9662
YBL062W	YBL062W	32.2971	35.7655	33.4044	35.5816	35.3731	57.7122	32.8669	31.4016	6.42902	19.3987	6.64844	24.1204	17.0087	17.1787	10.8	16.7637
YBL063W	KIP1	3.70429	4.06274	4.2632	3.42382	3.86717	4.7233	3.74754	3.38013	0.693656	1.30754	0.994136	1.29333	1.28578	1.10054	1.17774	0.999563
YBL064C	PRX1	369.346	440.998	466.212	247.713	416.739	448.592	276.552	318.648	136.793	193.733	147.388	196.11	242.522	240.395	229.717	247.68
YBL065W	YBL065W	6.98326	7.24245	5.58246	4.86473	7.08347	4.29669	4.80675	5.94149	2.8866	3.79428	4.57812	5.20906	4.32626	5.13977	4.95369	4.49717
YBL066C	SEF1	13.7295	15.4539	17.1418	10.0922	15.5627	12.8181	10.9636	11.6863	19.7738	26.1551	24.5936	29.3701	28.5792	26.1512	27.309	28.6096
YBL067C	UBP13	12.5822	16.2539	20.2549	11.384	15.8797	21.688	12.7013	11.7877	2.02726	2.8696	2.73052	3.57935	3.61725	3.62114	3.17069	4.51121
YBL068W	PRS4	31.033	24.8654	26.8351	41.7391	29.1508	27.2525	36.1291	34.1644	2.04783	1.69641	1.75544	1.38311	2.49557	1.8126	2.40501	1.29686
YBL068W-A	YBL068W-A	48.3856	36.5273	46.3769	62.5736	50.1463	34.0104	45.7573	46.2882	3.57538	5.79739	3.91818	5.43569	5.01142	6.63812	5.17932	4.39975
YBL069W	AST1	16.0624	14.7683	15.9126	19.1809	14.6676	11.6955	15.3002	15.956	1.59192	2.32673	2.11073	2.14491	2.87196	2.43125	3.2642	2.55956
YBL070C	YBL070C	6.11716	6.60816	10.1612	9.57854	7.01716	8.10297	6.30398	6.48856	0.802263	1.94964	1.42778	0.870514	2.60295	1.68184	2.24808	2.64433
YBL071C	YBL071C	28.5757	27.6847	29.3798	32.9617	27.4135	34.7569	28.4905	30.9559	42.4429	83.0166	56.7895	83.2985	69.3787	64.5569	66.9916	67.8715
YBL071C-B	YBL071C-B	6.07273	9.56031	8.70681	3.22739	6.57243	3.62972	1.07788	3.2977	6.00819	1.79657	0.780548	0.861969	0.946375	4.76253	2.84304	0.919199
YBL071W-A	KTI11	26.3002	22.9028	20.7961	36.762	28.4002	25.3864	28.6521	29.9395	68.1574	93.61	94.2193	107.903	101.524	88.9236	102.242	103.771
YBL072C	RPS8A	1360.82	1384.1	1447.82	1586.84	1540.37	1650.28	1579.78	1482.69	27.784	24.0586	29.4503	27.5132	16.4791	13.2322	17.4088	15.7186
YBL073W	YBL073W	10.7624	12.7856	12.5837	13.6183	12.4893	11.8362	11.4249	12.0837	3.66515	5.13804	4.28196	3.98763	2.69547	2.25847	2.19903	2.56295
YBL074C	AAR2	7.6363	7.31042	7.38287	6.82241	7.14564	8.50296	6.04616	5.66905	10.9807	12.9968	11.6643	13.2396	10.1117	10.3873	11.1999	11.5615
YBL075C	SSA3	25.6548	28.3951	21.9225	27.6478	21.5681	26.2659	25.637	25.2279	2169.15	1780.11	2243.56	2029.35	2578.23	1818.87	2467.44	2009.05
YBL076C	ILS1	44.8653	40.4153	47.5869	50.9855	44.2327	52.9449	42.6969	43.5763	5.22683	4.92957	6.03005	4.91028	6.63682	4.23037	6.77119	3.97334
YBL077W	YBL077W	126.007	142.37	137.261	139.847	138.833	178.486	139.751	135.874	4.24504	6.38507	4.50783	6.77369	5.45905	4.72961	7.46845	4.59008
YBL078C	ATG8	303.622	281.419	284.921	204.544	262.769	248.331	236.885	256.005	1302.77	1303.91	1294.24	1448.36	1196.72	1293.56	1164.73	1331.87
YBL079W	NUP170	17.6262	19.3262	20.4678	16.0412	18.3227	21.9337	15.855	16.6174	3.11707	6.83678	4.1565	6.80656	7.25859	6.4298	5.92791	5.99971
YBL080C	PET112	24.0342	30.3658	27.4578	18.8276	26.484	26.5103	19.9279	22.1521	3.02362	4.45847	3.70518	4.71624	2.63316	2.58649	2.76568	2.7783
YBL081W	YBL081W	8.32142	9.33044	10.2915	10.2453	9.11137	10.9862	9.73784	9.66775	1.12081	1.2295	1.43058	1.07641	1.33328	0.679447	0.808569	0.536972
YBL082C	ALG3	20.395	25.1758	27.313	21.4083	25.8072	28.8661	18.1741	21.7014	2.97424	3.4609	3.13285	3.3643	4.18048	3.3621	4.07394	3.1187
YBL083C	YBL083C	30.2443	34.7727	28.5533	28.6767	30.4942	34.7123	31.3719	30.8247	2.97618	4.46352	2.1721	4.11394	4.90327	5.24482	3.80789	4.46569
YBL084C	CDC27	20.5121	19.7124	21.1411	14.5989	19.3702	15.9364	18.6635	16.7391	19.503	39.4683	22.5004	41.4484	45.1252	42.1457	38.6698	42.9544
YBL085W	BOI1	27.3793	24.6398	26.8829	25.0355	26.1935	20.0951	24.8593	22.2409	1.87175	2.93052	2.30008	3.27784	1.84083	2.04362	1.94668	2.06232
YBL086C	YBL086C	53.2561	50.5854	47.4553	50.651	45.3915	44.9409	49.6027	47.5567	48.6515	58.0056	57.3171	60.7753	71.9889	59.8467	69.894	62.0073
YBL087C	RPL23A	271.659	230.004	273.683	394.408	266.92	331.972	410.662	299.399	27.6823	35.9525	34.4958	39.1507	15.4743	16.4829	17.071	17.9311
YBL088C	TEL1	4.39474	4.91471	5.30708	4.25673	4.72701	6.63617	4.05122	4.05146	0.523231	0.799741	0.630245	0.764318	0.776111	0.772446	0.780955	0.833254
YBL089W	AVT5	12.6598	16.9061	16.3667	10.4828	14.109	16.2341	11.8113	10.9872	1.14286	2.00626	1.24702	1.89882	2.4719	2.03545	2.12934	2.02205
YBL090W	MRP21	55.8511	65.1961	68.5729	55.3868	63.9591	77.0564	56.4818	53.4956	9.70776	21.3271	12.2175	19.5559	18.6585	20.0063	17.8491	19.1914
YBL091C	MAP2	181.138	227.759	210.946	188.019	213.572	233.6	173.419	188.339	13.246	15.7218	13.5733	15.8088	11.9949	13.8592	12.3801	13.912
YBL091C-A	SCS22	49.3358	54.8657	49.3656	37.3989	45.5165	51.5928	44.5088	45.3932	13.8611	26.2465	16.8046	30.455	20.8472	23.8232	20.7093	24.4787
YBL092W	RPL32	1337.64	1418.01	1543.94	1612.45	1552.64	2055.79	1728.51	1512.7	44.3179	57.2989	47.7683	60.0503	28.8384	26.6309	30.368	27.3899
YBL093C	ROX3	36.7425	30.4668	32.3836	36.1007	34.0277	27.5757	30.4642	30.9394	105.563	148.887	120.196	152.066	120.235	123.148	125.65	133.223
YBL094C	YBL094C	57.2825	70.4379	59.6376	53.2601	59.8147	62.6976	55.2965	56.6182	119.829	207.982	149.411	240.65	211.484	237.66	185.533	239.626
YBL095W	YBL095W	25.1278	27.8765	22.877	24.0749	24.8933	25.8559	21.0871	24.9115	94.07	124.724	104.737	137.121	137.854	139.548	129.59	148.941
YBL096C	YBL096C	14.3977	17.6708	18.7197	13.0759	16.0886	17.4258	11.3701	13.4854	21.1203	30.2349	25.0522	30.5756	38.669	32.675	32.4093	29.0511
YBL097W	BRN1	3.6433	3.96898	4.03569	3.07811	4.14137	4.00969	3.19887	3.14457	0.825649	0.875359	0.754221	1.08383	0.978945	0.979789	1.09461	0.867754
YBL098W	BNA4	39.0213	45.3429	44.9916	41.7426	41.0512	30.7648	40.9219	38.938	7.36638	21.9461	9.27199	25.5246	18.8902	27.1751	18.8947	26.4413
YBL099W	ATP1	447.676	632.171	680.042	366.879	568.567	638.426	433.707	424.186	378.389	287.59	411.156	337.071	275.982	250.15	265.203	267.319
YBL100C	YBL100C	380.587	538.729	623.569	229.794	494.177	523.355	345.895	334.699	119.692	153.951	149.972	200.475	189.779	184.623	152.201	168.619
YBL100W-A	YBL100W-A	0.464491	0.565737	0.184616	0.571499	0.540374	0.303449	0.675251	0.106756	0.0597776	0.0986246	0.0839001	0.148273	0	0.132404	0.0333694	0.177461
YBL100W-B	YBL100W-B	0.614745	0.330963	0.620973	0.453537	0.448851	0.413584	0.467024	0.457262	0.0317815	0.0292427	0.0401323	0.0635075	0.12371	0.10911	0.0876794	0.129725
YBL100W-C	YBL100W-C	40.2902	59.3442	46.4229	35.9465	66.1479	44.1281	35.8331	33.6772	27.2971	31.1206	25.0318	42.868	41.2621	34.3249	45.0997	42.3074
YBL101C	ECM21	26.6888	28.0404	29.211	20.7505	27.0347	26.7272	22.4639	22.0844	52.5956	80.4793	60.4535	93.8195	74.7167	69.9748	76.3539	76.2554
YBL102W	SFT2	52.1144	75.8148	87.5762	35.3812	72.4772	92.2454	43.6344	45.4344	28.9707	49.6785	35.6345	56.4661	54.6454	59.2878	52.9443	65.3721
YBL103C	RTG3	22.8513	16.6706	18.6149	20.3058	18.6687	13.7288	20.6859	18.5808	9.64133	21.9164	11.7001	21.9983	21.7931	19.8446	20.6006	20.1644
YBL104C	SEA4	6.75181	7.48515	8.07086	5.71996	7.41201	8.47517	5.76799	5.5756	1.27356	1.95944	1.44292	2.15494	1.88715	1.57472	2.19827	1.98299
YBL105C	PKC1	21.919	26.9146	30.9927	17.2155	26.5828	32.0068	19.9853	18.5586	8.73702	11.2528	9.59562	12.2706	14.381	15.434	13.7919	15.9425
YBL106C	SRO77	11.2301	14.458	14.6674	10.9117	12.6547	19.9232	10.5256	10.5043	2.50559	1.88854	2.38417	2.08291	3.18014	2.78126	3.12297	3.09192
YBL107C	MIX23	30.1175	39.3561	42.102	36.3402	35.04	62.3502	33.1181	30.1667	8.40595	17.4832	12.3953	21.2624	9.13616	13.3176	9.38267	12.891
YBL107W-A	YBL107W-A	4.05669	5.76496	3.81735	2.24839	2.61241	3.83336	6.76589	2.49088	0	0	1.63591	1.98412	1.8919	0	0	0.963955
YBL108C-A	PAU9	28.9246	34.5157	33.3467	21.3933	35.5873	41.4616	23.946	21.6182	3.85656	6.91455	6.40743	9.68733	6.43571	6.30019	5.27196	1.92094
YBL108W	YBL108W	1.89446	2.49862	2.67316	2.50636	2.3218	3.23646	2.5293	4.08668	0.271223	0.438097	0.189837	0.213607	0.465911	0.452741	0.226454	0.217343
YBL109W	YBL109W	3.589	5.31045	8.39955	4.52255	3.48287	6.32615	4.54803	4.41659	5.50619	5.68585	7.18239	6.57525	5.69583	3.27657	6.49197	8.36337
YBL111C	YBL111C	0	0	0	0	0	0	0	0	0	1.38757e-06	0	0.0273037	8.18475e-06	9.51017e-09	2.97276e-08	4.17624e-06
YBL112C	YBL112C	0	0	0	0	0	0	0	0	0	0	0	0.0510702	0	0	0	0
YBL113C	YBL113C	5.05136	7.03551	9.37481	5.543	6.70405	8.99216	5.31056	4.85945	1.90333	2.00249	2.04142	1.66955	2.51896	1.95626	2.22225	2.10322
YBL113W-A	YBL113W-A	8.14879	9.95817	12.428	6.8743	9.14732	11.7883	8.83321	8.60124	1.01554	2.64303	2.21495	0.740121	3.42325	2.33244	2.37937	2.36182
YBR001C	NTH2	42.431	45.8337	43.9198	27.6385	40.5016	35.1608	31.5947	34.0597	77.0136	109.604	90.5305	119.468	134.373	117.786	122.223	121.484
YBR002C	RER2	40.364	34.8673	31.4444	43.642	32.0429	30.6447	37.3297	38.1867	20.6035	26.4877	19.8251	25.3576	18.3323	21.2658	21.5908	20.9553
YBR003W	COQ1	83.1811	102.566	103.01	62.5164	90.0578	97.7397	65.8496	75.3772	16.0376	24.5343	16.4609	22.1024	18.4584	20.4644	18.4827	20.3176
YBR004C	GPI18	31.6377	28.2544	28.8417	26.937	24.8329	33.7473	26.4808	28.7786	4.82716	16.0033	5.96041	13.2091	24.3587	20.1184	17.1486	16.6419
YBR005W	RCR1	66.9255	57.052	59.5935	62.6906	63.5364	63.9231	58.2812	59.2638	91.6343	199.735	88.1917	149.651	242.574	212.212	221.797	174.591
YBR006W	UGA2	70.8972	81.5082	88.0654	59.4008	77.559	81.0854	63.1418	66.7533	35.4259	55.7892	44.053	61.0196	120.589	102.532	110.379	107.247
YBR007C	DSF2	7.8312	6.86352	7.65791	6.35935	7.68336	9.26591	6.36054	6.2579	1.98178	1.8132	1.97306	1.49111	1.88072	1.78003	1.58615	1.43593
YBR008C	FLR1	13.7234	13.7816	15.4807	11.7553	14.0074	14.6231	12.1012	12.6301	2.21525	2.085	2.13856	2.3193	2.8448	2.42822	3.05728	2.80243
YBR009C	HHF1	1942.34	1308.83	1511.48	1449.72	1431.63	847.61	2030.91	1642.51	268.457	234.584	312.996	285.321	205.737	227.43	215.759	251.913
YBR010W	HHT1	1278.42	822.912	937.56	1049.58	885.719	632.878	1323.11	1053.12	166.753	174.761	202.744	205.923	212.434	217.015	220.801	243.33
YBR011C	IPP1	694.428	778.957	833.69	647.687	804.434	885.275	618.834	675.318	163.256	292.099	179.265	286.017	246.815	258.533	238.39	261.054
YBR012C	YBR012C	32.4266	36.2993	33.8754	20.9548	27.5388	30.5509	25.6074	26.5051	3.4117	5.74106	3.25004	7.00445	4.16116	5.09196	4.75346	3.8189
YBR012W-A	YBR012W-A	0	0	0	0	0	0	0	0	0	0	0	0	0	0	0	0
YBR012W-B	YBR012W-B	1.56162	1.27903	1.83261	1.31314	1.27732	1.49546	1.38614	1.44619	0.209657	0.228372	0.214953	0.108706	0.171853	0.245573	0.0533794	0.168372
YBR013C	YBR013C	25.6554	23.4954	24.4332	14.1022	14.77	16.4002	22.1661	22.3433	3.61212	8.13183	5.40981	10.5714	7.68447	8.91671	5.8086	8.2812
YBR014C	GRX7	82.5197	88.1795	91.9442	62.2781	83.1513	86.7658	75.4664	74.7446	13.2286	27.4212	18.2669	25.6002	30.8314	34.1891	29.8181	33.0253
YBR015C	MNN2	61.2838	65.3082	71.4265	54.3237	64.2539	69.7153	53.5144	55.2899	7.35547	16.7258	8.91726	15.2965	23.316	22.9828	22.3325	21.2465
YBR016W	YBR016W	400.636	476.42	497.928	287.235	446.553	384.559	341.26	340.32	256.95	609.933	278.647	566.416	877.774	856.53	798.079	789.212
YBR017C	KAP104	25.7079	25.9835	29.3873	22.589	25.917	29.631	23.2556	22.8694	2.57209	3.71454	3.09243	3.15788	3.3559	2.73844	3.09054	2.75583
YBR018C	GAL7	3.23738	2.79297	3.50875	1.94555	2.6495	1.9373	2.67045	2.23748	0.913623	2.17475	1.16982	2.30879	3.9769	2.92825	4.51781	3.55648
YBR019C	GAL10	3.3835	3.67153	5.06969	2.64722	3.73311	3.07556	3.63793	3.24702	0.703145	0.923993	0.985241	1.39306	1.42557	1.604	1.86064	1.92465
YBR020W	GAL1	4.58649	4.92803	5.68053	2.64525	4.78459	4.84865	4.09594	3.90212	0.807186	0.822144	0.936951	1.10072	1.22295	1.1851	1.46241	1.37211
YBR021W	FUR4	3.90601	3.94925	4.84104	4.23405	4.05887	5.75607	3.81155	3.79666	1.44398	0.961828	1.60621	1.0035	1.09236	0.611591	1.27487	0.877892
YBR022W	POA1	22.4806	28.1337	30.4842	21.1293	29.0785	34.4962	22.2378	22.943	2.18152	2.2497	1.79445	2.43904	4.27293	3.73991	3.94608	3.84692
YBR023C	CHS3	9.8092	11.5642	13.6102	8.42795	11.0519	22.0658	9.23511	8.26535	5.47925	13.4386	7.35186	13.6953	16.7309	17.5481	15.712	17.7559
YBR024W	SCO2	46.9268	69.37	69.0315	37.066	62.9144	76.1595	43.5007	45.0294	17.9935	20.1825	20.1336	21.1887	26.3879	24.8439	23.5884	24.2358
YBR025C	OLA1	124.341	127.552	132.278	157.508	131.785	156.691	133.592	132.527	41.2661	49.8376	44.911	52.1514	49.9605	39.1508	51.8991	43.0644
YBR026C	ETR1	56.4205	81.6051	80.4153	36.7686	71.3456	71.2197	47.896	52.0018	39.0277	24.2627	39.353	26.5176	42.0311	44.6378	41.2466	49.9588
YBR027C	YBR027C	5.22564	5.85259	5.30602	4.07177	3.77998	4.32925	3.06679	4.12171	0.465738	0.56668	0.244333	0.552416	0.802301	1.55176	0.876935	1.1166
YBR028C	YPK3	10.7613	8.39192	9.54536	9.71241	9.08151	6.77811	9.19239	8.93746	2.04029	2.81306	2.54095	2.6494	3.10792	2.36223	3.37422	2.38316
YBR029C	CDS1	66.5026	77.7746	95.6181	58.1987	83.5643	100.965	64.7775	60.1841	7.56492	13.6853	10.6292	16.7871	12.8857	12.8969	12.9094	14.1729
YBR030W	RKM3	20.2167	20.7672	21.5889	18.5768	21.7458	22.2385	18.9291	19.842	3.7517	7.56879	5.0781	8.0254	7.23129	7.89364	7.24228	7.27595
YBR031W	RPL4A	977.67	1135.21	1192.86	1200.94	1156.17	1476.72	1066.45	1048.02	22.4855	22.89	25.8192	20.6799	27.887	20.4039	23.711	17.5601
YBR032W	YBR032W	17.0789	20.1996	19.0542	14.3101	15.6616	16.3175	12.1218	12.9395	1.84146	2.22974	1.54631	2.6091	3.55694	1.15291	1.84413	2.65474
YBR033W	EDS1	7.49783	10.6597	11.469	5.31452	9.11677	11.0557	5.73374	6.55108	1.62882	1.30761	1.93323	1.32515	1.66585	1.59714	1.69979	1.69998
YBR034C	HMT1	13.3755	10.412	12.7219	18.1637	10.4543	15.7018	17.019	14.2866	4.27298	4.93653	4.82334	5.11918	5.19544	4.09603	5.08249	3.72232
YBR035C	PDX3	192.437	207.256	214.087	175.132	217	196.638	176.11	192.706	60.9781	99.5013	67.9687	100.423	98.6238	91.8688	95.3681	98.2538
YBR036C	CSG2	121.435	130.194	133.229	95.6355	125.371	124.108	101.373	106.295	63.0047	93.175	69.9946	96.5258	120.412	116.583	113.633	116.308
YBR037C	SCO1	94.8703	114.67	114.89	72.4908	107.644	100.127	72.2335	84.5599	37.4048	49.5518	41.7008	49.4051	34.351	35.0294	36.0896	36.3712
YBR038W	CHS2	9.53728	9.20985	10.513	10.1518	9.53591	10.1925	7.68175	8.80503	1.16364	1.15243	1.28975	1.02423	0.760406	0.7239	0.780848	0.708004
YBR039W	ATP3	162.195	239.065	261.668	118.537	216.352	261.919	151.879	149.337	75.9606	84.3689	99.6892	100.826	130.798	105.746	122.826	116.338
YBR040W	FIG1	1.79546	1.52053	1.66562	1.8677	1.50751	1.64177	1.26012	1.74829	0.182705	0.159429	0.0959606	0.198191	0.119892	0.0224781	0.0462323	0.0431985
YBR041W	FAT1	23.5725	25.9224	28.9932	18.9995	25.3498	27.8588	21.4632	19.7579	2.45111	4.50993	3.33565	5.30142	7.71341	7.8728	7.47602	8.84229
YBR042C	CST26	12.3925	10.1777	13.4419	10.9364	12.6539	10.983	13.5808	11.0154	0.454346	0.45413	0.600109	0.532948	0.563161	0.621525	0.591695	0.459638
YBR043C	QDR3	15.8596	18.8522	20.7393	12.6317	18.8552	18.2627	14.3818	14.1553	8.41678	6.73632	7.82225	7.21044	9.79481	8.72999	9.44091	9.94862
YBR044C	TCM62	17.6526	27.274	29.1607	14.547	24.3478	31.735	16.497	18.1624	2.40437	2.57976	2.46342	2.5858	2.70179	3.02015	3.08958	3.57277
YBR045C	GIP1	9.32639	8.28537	6.86227	6.06216	5.89751	5.17419	5.42851	7.20155	4.39387	2.73218	3.78656	2.86929	5.45585	3.77141	4.71966	4.01284
YBR046C	ZTA1	45.9822	63.0135	71.9219	22.7477	56.7175	55.0751	37.4491	35.1273	42.519	64.2163	55.2998	73.9591	96.2852	93.0602	92.2595	104.349
YBR047W	FMP23	13.4303	15.8146	15.7997	9.44995	11.4485	11.906	9.80395	11.8139	5.69228	11.9801	8.61576	12.8814	13.0777	14.9811	12.4069	14.5905
YBR048W	RPS11B	531.565	441.764	555.287	684.902	535.677	656.869	640.331	548.711	11.1236	10.3786	13.7557	8.28816	5.76846	4.62551	6.40811	4.80226
YBR049C	REB1	34.474	30.3001	34.5607	29.836	29.3725	27.7705	26.8966	29.6446	32.1874	52.1065	39.3205	53.6464	48.6007	42.3887	48.7441	41.05
YBR050C	REG2	35.1264	42.5692	37.3055	25.716	34.013	29.0441	24.7644	29.8406	80.2776	69.4013	83.8609	74.8383	139.026	102.859	131.096	113.559
YBR051W	YBR051W	28.3656	31.9534	32.4827	25.8504	24.8928	17.3634	20.4841	28.3452	27.3043	33.4173	37.1348	39.9081	71.5556	53.8011	66.5657	57.2597
YBR052C	RFS1	457.667	624.864	571.442	355.072	539.487	511.529	383.977	453.92	148.285	154.603	158.254	152.657	238.759	177.9	210.006	185.665
YBR053C	YBR053C	159.535	191.401	192.661	112.078	173.72	169.556	118.764	145.238	35.7662	37.2457	39.4382	36.0898	31.9197	34.9383	32.625	36.3005
YBR054W	YRO2	33.0851	24.8524	25.2663	73.7083	24.4242	15.9731	41.0295	46.6774	31.7996	13.115	36.264	16.9035	24.4986	13.422	25.9579	15.7314
YBR055C	PRP6	11.0205	11.9972	11.875	10.8077	11.2349	13.4977	10.0035	9.90874	1.91463	3.65951	2.0509	3.68101	4.08293	4.08124	3.54008	3.64168
YBR056C-B	YBR056C-B	0	0	0	0	0	0	0	0	0	0	0	0	0	0	0	0
YBR056W	YBR056W	131.219	150.333	156.794	93.8741	134.883	137.763	103.381	114.85	19.7589	28.4549	21.6198	27.1448	42.6096	45.3424	41.9985	43.1585
YBR056W-A	YBR056W-A	100.68	74.5544	99.1589	98.4978	94.1043	105.112	83.8889	89.0157	106.21	226.15	100.016	156.911	316.919	272.902	278.246	210.5
YBR057C	MUM2	27.9668	25.8405	30.7731	19.4333	27.9937	23.0464	24.2395	22.3748	4.51101	7.59381	5.2642	8.47705	8.92926	9.38091	8.90912	9.06818
YBR058C	UBP14	26.2958	29.1677	32.6807	21.6259	29.1828	30.5616	21.8759	23.8236	2.30533	3.95392	2.78261	4.47788	5.29311	4.90345	4.99845	5.36541
YBR058C-A	TSC3	222.178	231.553	230.079	179.601	211.042	221.703	215.198	226.547	27.6705	48.9677	33.5505	48.5163	47.7601	58.6281	49.491	49.4111
YBR059C	AKL1	38.5771	46.2837	50.3331	31.6268	43.1656	52.9743	32.9148	32.6933	10.4598	14.5455	12.5352	16.1819	17.4519	15.8796	17.182	16.6441
YBR060C	ORC2	11.05	10.8021	11.918	10.4029	10.7636	11.5552	10.1745	9.10043	1.17077	1.0626	1.42022	1.12157	1.18985	0.972255	1.59288	0.999992
YBR061C	TRM7	8.6013	8.69328	8.18758	12.3235	8.6515	9.35691	11.4976	9.34233	1.07946	0.977026	1.26197	1.02856	1.8742	0.792269	1.52012	0.946553
YBR062C	YBR062C	43.763	65.9346	62.0976	37.8459	54.305	74.9039	41.2569	45.9234	10.5416	16.6498	11.4408	18.7117	15.8529	22.3827	16.797	20.9206
YBR063C	YBR063C	17.8211	20.2354	19.269	13.0282	17.7676	22.6733	14.8751	16.399	3.93829	9.32504	5.55267	9.32901	13.227	12.9776	11.8983	12.4192
YBR064W	YBR064W	10.4881	6.44409	9.47344	5.00141	6.26621	9.68598	8.448	8.68956	0.933821	0.770331	0.987365	2.16053	3.10941	1.76076	2.95503	2.10259
YBR065C	ECM2	14.3795	12.0412	14.0478	13.262	12.0943	10.205	11.9234	12.2325	6.43676	12.379	7.97002	11.3929	16.0856	15.1072	15.2597	15.9979
YBR066C	NRG2	27.2196	20.837	20.3259	19.3426	19.9421	17.9574	20.5557	19.0332	2.34105	3.34201	2.51468	2.74838	2.14831	2.69085	2.75443	2.04125
YBR067C	TIP1	15.3909	15.4238	12.7383	16.1981	12.7387	16.0877	12.6927	16.7208	11.4859	19.3742	14.4961	18.7467	8.73051	13.2708	8.25113	10.6657
YBR068C	BAP2	15.2298	37.8493	36.1748	31.2701	28.0218	51.4619	18.6774	25.4021	5.95404	3.45154	6.65259	4.12925	13.9596	7.54026	12.3257	8.4897
YBR069C	TAT1	3.57901	5.91352	6.76315	6.43564	4.83821	6.93986	4.09458	3.8797	1.95211	1.29117	2.63868	1.3616	1.86567	1.25364	1.76525	1.447
YBR070C	ALG14	26.1839	25.6578	27.1029	24.9415	27.9151	23.8443	25.5189	24.5618	5.00096	4.21595	4.63714	3.96076	4.63328	3.33974	4.78007	3.95853
YBR071W	YBR071W	21.6755	20.8134	22.9691	26.9413	22.4299	22.2986	24.7127	25.5371	66.9365	64.3601	56.4776	58.0023	75.4692	61.2828	80.4022	65.2004
YBR072C-A	YBR072C-A	4.75478	2.88776	1.76213	9.1255	3.51147	1.09003	1.55007	8.26328	13.7658	11.9064	13.6428	16.2614	9.34469	13.1447	6.46386	8.44531
YBR072W	HSP26	46.8035	42.9929	31.9321	149.251	37.3053	54.4262	60.2082	88.2322	1736.89	803.159	1589.56	918.141	1307.86	703.046	1352.33	806.532
YBR073W	RDH54	1.75928	1.68723	1.98938	3.00682	1.61194	2.50587	1.87259	1.90691	4.90646	3.35927	4.39703	3.55401	3.46018	2.87557	3.957	3.24131
YBR074W	PFF1	12.7327	15.1552	16.6268	12.5833	14.1606	18.7711	13.287	12.0964	1.04599	1.19058	1.35767	1.36585	2.04576	1.64555	2.10177	1.73648
YBR076C-A	YBR076C-A	72.5562	88.0908	77.5594	61.869	74.469	78.5936	65.4923	67.8719	44.8781	75.7896	49.1535	69.4936	82.9054	73.2891	70.9034	69.6071
YBR076W	ECM8	12.6917	14.4576	14.5743	7.22079	12.7776	12.1422	7.95669	10.7533	1.69271	2.35417	1.66913	2.04262	2.75067	2.90054	1.95469	2.94588
YBR077C	SLM4	113.017	131.305	126.307	95.9908	125.565	129.219	98.4655	116.623	101.654	163.74	120.703	166.795	177.098	169.054	173.995	173.247
YBR078W	ECM33	127.567	109.146	129.217	164.436	120.554	125.885	141.108	132.644	12.9033	12.6125	14.9668	12.1597	19.3262	12.6727	19.3611	14.3556
YBR079C	RPG1	40.7427	39.8128	43.1934	55.6863	44.946	47.6936	46.1326	43.6645	1.79237	2.21047	2.45861	1.98707	3.31508	2.03186	3.29948	2.06417
YBR080C	SEC18	44.9042	49.1742	56.0055	35.1235	49.9224	53.2773	38.1369	36.7299	3.33432	5.1907	4.04166	5.7476	7.16312	6.51786	6.47431	6.42642
YBR081C	SPT7	20.2304	24.4516	22.0043	18.6936	21.9218	25.6807	16.3953	18.4366	2.41611	2.73886	2.51383	2.67442	2.41122	2.00668	2.51215	1.83687
YBR082C	UBC4	633.247	562.975	513.15	685.386	567.823	519.529	573.082	671.462	343.426	381.616	318.638	363.138	281.827	252.007	291.881	236.826
YBR083W	TEC1	12.7185	15.1955	14.1765	11.1977	12.8577	14.7275	9.34148	10.1335	3.18287	2.57688	3.85313	3.12484	4.71642	3.54954	4.85333	3.0854
YBR084C-A	RPL19A	459.603	473.857	524.153	556.105	490.177	676.977	543.161	483.412	18.3689	26.7927	21.1244	25.6474	25.707	25.9572	27.2886	25.0596
YBR084W	MIS1	28.8201	32.2	35.2073	39.6813	33.903	45.7703	32.4229	33.1584	0.825152	0.726016	0.963573	0.806375	0.97311	0.631777	1.05814	0.687393
YBR085C-A	YBR085C-A	2389.18	1821.59	1986.76	1642.34	1950.07	1368.59	1926.31	2040.92	969.495	1119.97	996.328	1218	1755.66	1729.36	1746.92	1763.64
YBR085W	AAC3	4.52031	4.04553	4.62456	5.07545	3.70007	4.68752	4.77319	3.99422	0.405212	0.483301	0.44417	0.488507	0.185013	0.260033	0.133755	0.354001
YBR086C	IST2	98.1403	91.6943	102.438	73.6296	93.8465	78.0072	81.0646	82.3192	10.4284	15.9414	10.9128	14.8476	26.9767	22.5529	24.5605	22.1974
YBR087W	RFC5	22.1453	17.6374	20.0363	23.2261	22.9105	15.9104	23.0863	22.671	0.504843	0.463419	0.514778	0.537533	0.370658	0.383091	0.526263	0.368235
YBR088C	POL30	24.4879	14.2014	17.4542	31.0276	21.3156	10.1396	34.5667	21.5848	3.0304	3.94182	3.04717	3.88578	2.77486	2.97576	3.46218	3.19354
YBR089C-A	NHP6B	466.913	502.886	545.632	425.995	510.601	498.452	452.259	471.275	164.649	360.162	192.739	426.656	398.162	500.827	435.918	556.867
YBR089W	YBR089W	10.6325	6.60553	8.5187	13.6672	7.77665	4.22245	12.2591	10.6154	0.722696	0.542684	0.723364	1.12487	1.21786	0.707999	1.1611	1.01054
YBR090C	YBR090C	65.5044	79.9067	83.7861	56.9507	74.9602	77.7703	51.3257	62.36	35.2128	74.5706	37.6556	85.8918	78.9621	91.3812	81.7694	100.058
YBR091C	TIM12	95.8744	83.9784	79.2883	89.774	87.6146	72.6012	83.1016	86.1013	45.7387	86.8477	49.7401	86.9972	54.1996	60.4977	53.9489	60.6121
YBR092C	PHO3	40.7808	31.3712	37.2117	76.5257	34.6078	28.715	56.7089	44.3762	0.59549	0.534393	0.489557	0.546905	0.256993	0.214081	0.288558	0.0889653
YBR093C	PHO5	9.35629	11.2589	13.8694	8.42163	10.6555	11.9566	8.69908	9.16997	1.67104	1.09619	1.56702	1.15848	1.7357	1.95349	1.71761	1.95168
YBR094W	PBY1	18.0297	19.7656	22.3552	16.2103	19.5686	22.3877	17.7859	16.5207	0.922235	1.11569	1.18977	1.13156	1.5585	1.23818	1.48307	1.61065
YBR095C	RXT2	24.006	19.7469	19.21	21.8174	20.0609	17.1129	20.0824	21.5729	13.6857	26.0016	16.4942	25.313	24.2259	23.0839	22.9975	21.4688
YBR096W	YBR096W	66.5281	76.3021	72.858	61.4303	66.1111	74.836	56.8863	57.4579	3.06987	4.82422	3.65003	4.63635	2.4584	3.19283	2.91825	2.28451
YBR097W	VPS15	9.57717	8.88151	9.84596	7.63992	8.7208	9.03973	8.72572	8.20451	0.228474	0.258794	0.303505	0.253757	0.284561	0.263855	0.185063	0.216567
YBR098W	MMS4	17.5736	14.587	13.5362	24.2571	14.1847	16.6873	16.9533	20.8024	3.04341	3.61991	3.38168	3.75017	3.81553	3.06039	3.3877	3.26464
YBR099C	YBR099C	28.9246	20.6694	15.1278	18.7622	19.0935	22.2933	24.3713	35.4183	0	0	0	0	0	0	0	0
YBR101C	FES1	246.301	99.5855	82.4146	632.713	123.436	96.629	328.615	348.767	1712.78	1666.61	1817.99	1652.9	1364.38	1082.16	1301.34	1026.99
YBR102C	EXO84	13.1774	14.0778	15.5308	14.024	14.742	17.1722	12.7129	12.4608	8.58633	8.8697	8.04763	7.7362	4.06382	4.92934	4.10261	4.47235
YBR103C-A	YBR103C-A	14.8691	17.4749	11.6197	7.22882	13.278	6.8801	5.76919	10.9682	0	0.971916	2.16385	2.86944	2.55677	0.52136	4.14725	0.512341
YBR103W	SIF2	18.7244	21.7456	22.003	18.6047	21.3898	21.8189	18.4261	17.5836	9.95192	13.623	11.1572	11.6076	9.61701	10.4644	9.71286	10.7073
YBR104W	YMC2	15.9739	11.8594	10.8048	21.9584	13.2156	14.0197	19.4599	19.5117	2.94898	2.48663	3.50651	2.95107	2.38327	2.35032	2.56329	1.91431
YBR105C	VID24	128.806	161.5	165.755	104.301	138.242	131.081	100.664	113.844	266.335	244.957	272.76	243.402	213.642	190.468	222.036	193.539
YBR106W	PHO88	402.453	370.035	360.186	544.213	398.235	402.715	437.384	467.534	218.931	266.816	256.544	287.557	159.976	166.281	176.374	181.09
YBR107C	IML3	21.9707	21.8361	24.6715	19.1848	22.8378	23.5828	19.1555	19.7297	7.03365	7.3828	7.28887	7.73122	4.80704	4.72463	6.0271	5.11872
YBR108W	AIM3	18.5128	24.8855	28.087	13.2699	23.8992	27.4479	16.2563	15.8987	27.8857	37.0697	30.2224	38.4967	40.446	37.8078	38.2787	40.0148
YBR109C	CMD1	412.232	458.893	442.916	385.388	451.208	460.85	385.56	418.739	70.1879	118.326	83.9404	129.565	96.6585	105.376	90.9888	106.907
YBR109W-A	YBR109W-A	5.8902	5.97705	6.66849	4.22499	5.47805	5.06354	7.29245	7.16525	1.64242	0.978958	1.54563	1.91052	1.66176	1.02733	2.03533	1.19313
YBR110W	ALG1	36.5805	38.0207	42.0313	28.1636	37.7419	35.8143	30.6439	30.9436	3.20009	6.11445	4.53451	6.0583	4.16475	4.16088	4.12402	4.75854
YBR111C	YSA1	146.305	186.4	186.703	142.21	175.056	196.58	141.676	155.909	17.9866	24.3931	19.2334	24.689	35.7432	34.3282	36.3512	38.8833
YBR111W-A	SUS1	69.7479	91.6171	89.6646	64.3986	75.2219	112.38	72.7779	72.5191	1.48902	4.31518	3.12411	3.62892	4.7242	4.22552	4.21998	5.13127
YBR112C	CYC8	31.8018	33.9272	37.1735	29.1449	33.3703	36.3832	29.5354	27.675	3.42397	4.71588	4.2358	5.08576	7.86708	6.36101	8.18564	7.92816
YBR113W	YBR113W	19.5008	19.3185	21.2118	18.9076	17.2852	17.5861	17.5492	15.494	1.9517	4.18785	2.45806	4.04509	5.59399	4.98571	5.24724	5.28299
YBR114W	RAD16	16.9516	24.1806	23.5299	17.0121	21.3332	28.2382	15.994	18.8847	9.04197	14.0406	9.63576	15.6967	27.3676	22.9888	26.7303	24.8547
YBR115C	LYS2	18.6837	19.6498	22.6837	19.5049	20.1914	21.0261	19.047	18.4634	0.949635	0.90398	1.11327	0.816648	1.71202	1.07601	1.667	1.09012
YBR116C	YBR116C	159.327	288.26	225.852	63.4703	212.156	214.575	90.1065	148.304	17.4663	24.2725	16.937	28.7961	44.8108	59.1678	40.3598	82.215
YBR117C	TKL2	288.73	320.329	307.417	142.699	290.74	175.704	192.77	224.651	30.0796	33.5171	34.786	39.279	59.8771	85.3573	72.6248	115.868
YBR118W	TEF2	4542.89	4257.86	4353.61	5296.01	4645.89	4355.25	4503.52	4533.47	1791.54	1664.94	1818.9	1736.57	1275.89	1138.89	1257.86	1198.41
YBR119W	MUD1	33.4439	25.849	25.3507	36.4202	25.5248	23.7895	30.5945	29.3825	41.3827	57.6222	45.8691	54.9649	35.8236	37.5159	35.3446	35.7468
YBR120C	CBP6	71.8975	83.3771	90.4146	50.0487	88.1906	95.4209	64.6982	59.9477	54.7816	93.2223	76.064	105.782	61.7683	83.6021	64.021	86.2043
YBR121C	GRS1	123.385	131.845	136.008	151.01	137.984	159.717	134.923	130.476	5.17938	6.64156	6.17473	5.82775	5.61762	3.98928	4.99109	3.19639
YBR121C-A	YBR121C-A	0	0	0	0	0	0	0	0	0	0	0	0	0	0	0	0
YBR122C	MRPL36	190.681	248.88	233.468	144.862	215.837	259.457	147.267	181.485	63.1913	110.1	74.4506	118.598	71.0256	82.5485	69.3318	80.353
YBR123C	TFC1	15.1758	15.1241	15.1331	11.9217	14.6623	14.5325	12.9335	13.3824	3.12509	3.2888	4.06257	3.96199	2.5615	2.43884	2.62603	2.90736
YBR124W	YBR124W	6.11882	5.68947	5.27224	3.85919	5.98142	5.25098	4.10693	5.234	0.803596	0.880218	0.764863	1.3556	0.855965	1.14999	1.3373	1.04133
YBR125C	PTC4	35.931	38.9476	41.3311	25.4272	38.313	42.9697	30.0672	30.0966	6.8039	9.82947	7.4383	9.83296	9.49664	11.2883	9.263	10.7593
YBR126C	TPS1	1400.62	1730.59	1768.26	994.545	1633.86	1418.58	1095.58	1263.06	285.644	219.118	288.96	243.696	353.742	281.186	349.267	302.173
YBR126W-A	YBR126W-A	703.931	800.941	744.546	614.798	773.588	735.789	646.584	670.326	160.146	159.813	162.411	180.737	288.831	243.682	278.415	252.754
YBR126W-B	YBR126W-B	1604.35	1972.77	1805.73	1540.93	1777.91	2141.52	1421.08	1428.31	326.364	396.841	388.4	409.239	694.478	544.302	639.264	596.299
YBR127C	VMA2	258.734	290.049	307.144	266.762	287.396	338.807	237.876	253.614	19.4878	12.841	19.0235	13.5337	13.6706	13.3006	13.852	12.9498
YBR128C	ATG14	26.8774	26.6513	22.4962	20.152	21.5152	19.7092	18.6341	23.0669	3.57938	6.02063	3.71193	6.3944	7.22447	7.0036	5.75546	6.76796
YBR129C	OPY1	36.6162	37.2122	37.0375	26.5726	34.6086	30.2914	29.3502	31.4303	7.96866	17.6523	10.3359	16.7117	16.4661	17.6324	16.7943	17.5996
YBR130C	SHE3	36.4642	30.8436	30.8869	33.7632	28.6765	28.3214	29.1654	31.5241	1.76383	2.96957	1.7776	2.82625	2.3984	2.32649	2.44625	2.16609
YBR131C-A	YBR131C-A	0	0	0	0	0	0	0	0	0	0	0	0	0	0	0	0
YBR131W	CCZ1	8.64736	6.68626	6.69496	8.23	6.25508	5.98312	6.57801	7.46544	1.08079	1.48246	1.15737	1.48996	1.27045	1.13925	1.26555	0.926692
YBR132C	AGP2	67.9166	79.0606	79.1769	47.4226	69.0169	57.8055	57.4006	58.9757	98.3664	143.35	103.833	149.396	197.396	153.024	166.638	148.295
YBR133C	HSL7	17.5842	21.8703	21.617	14.6998	20.8491	24.4615	14.9682	15.0148	9.2009	12.5693	11.0838	12.8784	8.16833	8.70732	9.22676	9.05415
YBR134W	YBR134W	2.35427	1.39118	1.34854	1.66446	2.42921	0.987777	1.66196	0.899674	1.23946	1.03691	0.65068	1.34204	0.512109	1.19203	0.779343	0.672848
YBR135W	CKS1	44.5226	31.2124	34.7426	45.423	35.3652	27.3861	37.0513	36.3524	22.486	33.1558	23.7976	30.8979	17.2734	19.0301	17.8285	17.9106
YBR136W	MEC1	3.99905	4.76287	4.95755	3.135	4.21723	5.2988	3.42177	3.48033	1.37998	2.49135	1.64213	2.6778	2.06619	2.16275	2.00297	2.30721
YBR137W	YBR137W	118.994	142.932	130.262	92.9288	121.376	132.435	90.0511	111.848	15.3848	14.7451	16.0408	14.5734	30.1364	29.0827	24.0655	28.4039
YBR138C	YBR138C	13.4218	10.8147	10.8217	11.4921	10.7153	8.99555	10.5842	11.5468	1.49562	1.42136	1.94956	1.30463	1.90609	1.14883	1.51084	1.26109
YBR139W	YBR139W	139.731	160.095	169.986	84.3494	154.875	134.028	112.06	110.134	52.0493	51.9879	52.0561	57.1971	95.2684	78.1872	86.3006	79.3747
YBR140C	IRA1	10.2358	13.7826	14.4168	8.48221	12.0968	17.0274	9.02067	9.44766	4.75507	5.60163	4.91514	5.93673	8.67932	7.2501	7.08472	7.65005
YBR141C	BMT2	7.17022	6.86489	7.91538	7.3637	8.11742	6.76961	7.73676	7.09966	0.787175	1.8075	1.20736	1.48138	1.88175	1.99297	1.45458	1.56217
YBR141W-A	YBR141W-A	0	0	0	0	0	0	0	0	0	0	0	0	0	0	0	0
YBR142W	MAK5	10.6666	10.0308	11.0676	16.2565	11.8056	15.5382	14.793	14.673	1.11914	2.45605	1.44904	2.21519	3.39691	2.55102	2.9541	2.37403
YBR143C	SUP45	101.517	100.449	109.27	117.67	103.04	126.14	106.065	104.1	9.71592	20.0791	13.0904	21.0321	18.1128	15.1154	16.1452	14.8217
YBR144C	YBR144C	14.7595	17.925	14.4191	7.66303	13.1612	10.5933	9.45775	10.9253	2.05876	1.97758	1.07966	1.62349	1.54903	1.93157	0.9669	1.13292
YBR145W	ADH5	45.9072	42.1033	45.0425	45.6456	45.5548	37.5884	47.366	44.7019	8.36934	12.0579	9.39139	13.5557	8.33525	12.3655	10.271	15.2691
YBR146W	MRPS9	106.578	141.047	143.471	90.1704	122.247	164.921	87.4528	98.1973	28.6295	58.2081	35.3208	52.6421	44.3701	47.1583	44.0215	46.6733
YBR147W	RTC2	27.8336	27.9946	25.4618	20.8865	23.6642	17.0406	26.3899	26.0198	34.3388	76.3294	42.3793	84.6148	118.487	117.093	106.352	118.742
YBR148W	YSW1	6.83237	6.97029	6.59444	4.80219	5.24095	4.86076	4.74267	5.44243	1.57866	2.65889	1.69262	2.31664	4.68485	4.07449	4.42671	3.20135
YBR149W	ARA1	500.73	637.311	660.589	364.664	579.211	623.113	398.765	441.887	134.741	207.597	155.207	247.51	457.583	439.698	460.457	494.914
YBR150C	TBS1	13.5593	11.2269	11.1708	11.3392	11.146	11.5899	10.275	10.5561	10.5452	22.7537	12.8388	23.2219	24.7333	23.0198	20.325	22.5049
YBR151W	APD1	131.955	166.06	166.629	107.202	147.55	168.664	111.452	124.243	82.5172	138.117	99.9248	143.887	140.388	141.943	130.251	142.822
YBR152W	SPP381	8.19785	8.0026	8.09651	8.74152	8.25531	7.15933	7.33555	8.19266	5.09818	6.51792	5.67141	6.61968	6.83784	6.29679	6.80683	5.93907
YBR153W	RIB7	29.9701	38.8688	36.2606	29.0752	36.179	40.1743	24.1397	28.5519	6.50708	11.3367	8.85703	10.9936	11.696	9.64455	10.514	9.0681
YBR154C	RPB5	70.7414	65.3694	70.4163	98.7492	71.9045	67.8648	93.547	83.8156	2.52522	2.20487	3.52557	2.66664	2.90474	1.71352	2.76993	2.33589
YBR155W	CNS1	9.06956	6.69377	8.44801	12.4594	9.63413	10.0067	11.2425	10.0794	2.01801	2.62164	2.27567	2.66374	3.4129	2.59352	3.47465	2.17567
YBR156C	SLI15	2.78544	3.14585	3.72357	2.56581	2.71686	4.16393	2.82051	2.72588	0.766377	0.709205	0.834404	0.952423	1.49144	1.07382	1.22485	1.04923
YBR157C	ICS2	2.57855	2.84085	3.12102	2.0632	2.29017	2.73714	3.3218	2.58074	0.73257	0.801167	1.14246	1.30927	1.68767	1.0942	2.47031	1.60281
YBR158W	AMN1	7.90277	7.8731	8.54118	8.87861	8.0337	5.81521	7.7553	7.35938	0.656041	0.551129	0.632715	0.749805	0.662447	0.495671	0.614774	0.550873
YBR159W	IFA38	91.4148	95.7629	100.021	80.6273	90.3637	87.4862	81.7894	83.3521	2.63034	1.61315	3.01892	1.6694	2.3569	1.86825	1.86674	1.68799
YBR160W	CDC28	58.5804	60.8493	61.8944	51.1638	63.9662	49.4783	53.0423	53.4074	8.14864	10.249	10.287	10.3059	12.2769	8.99122	12.9219	9.95725
YBR161W	CSH1	78.715	66.0477	64.6042	68.478	62.8755	51.1668	62.7133	69.4198	1.92245	2.00376	2.57193	1.90329	2.09036	1.64755	1.891	1.74709
YBR162C	TOS1	82.396	53.6192	69.1317	90.0293	69.8571	54.4327	85.7436	68.5278	16.3931	20.5398	18.6707	19.2444	26.3815	19.3881	29.5602	19.6772
YBR162W-A	YSY6	517.485	488.797	465.887	553.811	452.728	487.082	479.013	485.399	131.412	292.295	145.569	242.697	243.79	242.778	236.481	231.035
YBR163W	EXO5	12.4063	13.0894	14.0619	10.208	12.3539	14.164	10.3043	10.1417	1.7758	3.19831	2.25337	3.06961	2.43719	2.66868	3.05633	2.48781
YBR164C	ARL1	95.9197	79.4768	85.9982	88.54	84.8081	79.3275	89.2027	86.7938	4.71469	5.40803	6.07866	4.90273	3.21482	3.09181	3.36892	2.34757
YBR165W	UBS1	61.6953	44.9465	41.3028	55.4489	46.3963	31.9558	49.7888	55.0148	21.1589	51.1689	26.5521	49.77	37.1187	40.4045	34.91	35.7195
YBR166C	TYR1	26.3897	24.7822	25.4017	25.0759	24.6496	22.0991	23.8823	23.5996	0.816343	1.03472	0.963501	0.824212	0.764897	0.685929	0.948873	0.54084
YBR167C	POP7	40.8913	48.9422	43.0254	40.8773	42.888	50.1448	38.9952	43.2974	9.96121	19.7098	11.1619	22.1984	23.4722	24.6544	20.6268	27.4134
YBR168W	PEX32	20.3522	19.1388	20.1715	15.095	18.527	19.1052	16.1553	16.8871	2.77784	7.11353	3.97401	7.50366	7.79415	8.08218	6.72071	8.06326
YBR169C	SSE2	84.2819	61.3539	63.3432	118.177	62.9778	49.9782	76.6102	83.1539	227.832	182.452	246.644	196.175	161.355	124.085	162.056	131.036
YBR170C	NPL4	29.4142	33.0941	35.0296	22.064	31.4089	34.7407	24.3995	26.2242	31.4317	44.6403	39.0808	49.0586	34.1442	33.4287	33.7787	34.9327
YBR171W	SEC66	53.0606	36.7476	41.2297	50.3367	42.8722	40.1676	51.8586	47.1235	2.82248	5.54444	4.0748	4.83605	3.19164	2.61618	2.48853	3.41778
YBR172C	SMY2	36.7654	46.8361	47.8672	42.0076	42.4184	50.4593	36.5284	37.4945	5.99488	9.32176	6.98799	8.50233	8.59747	6.44359	6.92354	5.53453
YBR173C	UMP1	168.956	205.232	203.268	140.081	188.65	248.623	133.965	162.525	42.3044	66.4519	55.8664	71.7085	40.7736	52.8708	43.6983	53.7546
YBR174C	YBR174C	6.09514	5.70779	5.72934	7.34984	5.48525	5.24723	6.5737	6.24	0.639161	0.494775	0.917839	0.840151	0.60513	0.214942	0.46391	0.600858
YBR175W	SWD3	20.1095	22.1748	20.9704	20.6916	22.0232	23.1335	18.6185	20.1315	1.56327	1.47475	1.48524	1.20903	1.11043	1.07084	0.943881	0.709628
YBR176W	ECM31	17.6244	21.8033	23.6147	15.144	19.9864	20.1817	15.0615	17.0184	2.45307	2.92998	2.50432	2.9785	3.17508	2.16698	3.54128	2.44995
YBR177C	EHT1	337.725	363.008	386.38	274.822	356.269	347.135	277.227	292.994	134.215	118.135	141.447	133.796	182.672	163.552	170.354	180.803
YBR178W	YBR178W	9.50247	8.36294	9.17456	6.20308	8.74181	9.47235	4.91987	6.02723	1.97654	3.36647	2.87374	3.12836	3.8186	2.22318	5.29076	3.27446
YBR179C	FZO1	20.431	23.9997	27.2444	14.968	22.5729	24.7116	18.0195	17.2904	18.9009	33.9011	24.5936	37.9104	42.5737	39.2925	38.4576	40.658
YBR180W	DTR1	1.38967	1.17663	1.20138	0.930794	0.901176	1.1507	1.16176	0.957296	0.480874	1.06415	0.676763	0.96578	0.802624	1.12598	0.979092	1.14369
YBR181C	RPS6B	714	558.035	640.741	977.861	683.751	755.252	955.092	746.185	13.1081	10.5322	15.9343	10.7854	6.13814	5.08235	7.61561	4.42434
YBR182C	SMP1	4.91541	4.27101	4.14887	5.16066	3.81481	3.70619	3.95958	3.9561	0.928171	1.09065	1.11625	0.905282	1.47096	1.08377	1.44455	1.21359
YBR182C-A	YBR182C-A	10.1391	7.28225	7.68879	8.25093	5.67746	5.22597	5.72968	5.67275	1.77171	3.91393	1.38728	4.62336	5.26087	4.68059	6.32276	7.25272
YBR183W	YPC1	74.1921	57.931	55.1813	74.0585	50.8418	38.2768	54.7856	64.4416	28.7135	32.3759	35.7385	40.2432	84.8894	60.9521	84.7457	75.3008
YBR184W	YBR184W	1.6329	0.847164	1.41381	1.65993	0.995593	0.434849	1.11811	1.01506	0.113834	0.142439	0.159488	0.114685	0.1623	0.0930339	0.192262	0.201312
YBR185C	MBA1	32.1545	40.2946	44.7484	28.3093	36.1438	50.8582	28.7139	29.3053	3.8624	9.05239	4.97712	9.49717	8.40916	9.24048	7.27816	8.00651
YBR186W	PCH2	3.26838	2.76628	3.64512	2.68771	2.94219	2.75277	2.80458	2.91746	0.348881	0.578617	0.623239	0.70668	0.574088	0.513079	0.563529	0.46263
YBR187W	GDT1	52.3168	48.9995	55.1108	53.4255	53.3631	61.1834	60.3948	51.7945	3.09797	2.45824	3.06752	3.18531	3.28736	2.86633	3.07016	2.28712
YBR188C	NTC20	34.3859	45.0973	42.1668	34.4526	40.5539	44.9574	35.0872	33.7951	7.98972	12.6296	7.18716	11.8103	11.6012	15.2315	12.4022	14.7896
YBR189W	RPS9B	1082.86	1187.43	1255.27	1372.89	1337.8	1589.91	1391.41	1203.6	10.8131	10.5533	11.9178	10.4801	3.19126	3.64764	3.64326	3.87611
YBR190W	YBR190W	3.52504	2.27925	3.22487	4.30061	2.77713	3.18734	1.8664	2.81512	0.17451	0.317599	0.183149	0.206456	0	0.109216	0.109305	0.104834
YBR191W	RPL21A	528.108	393.77	466.77	703.247	500.631	447.9	658.202	556.483	8.39439	5.20832	8.90084	6.5567	2.2546	1.79493	2.3938	2.10923
YBR191W-A	YBR191W-A	124.895	128.164	112.91	136.774	120.878	118.987	166.13	146.51	0	1.26698	1.0694	1.22191	0	0	0	0
YBR192W	RIM2	14.1973	16.0783	18.7736	13.495	16.439	21.7495	14.2133	12.324	0.70317	0.585495	0.521481	0.649114	0.797319	0.575688	0.610925	0.406926
YBR193C	MED8	28.8682	26.3746	29.2867	28.5773	27.2707	26.1069	27.69	27.3263	3.69993	3.47998	3.52435	3.49379	4.22053	3.94711	3.64062	4.13441
YBR194W	AIM4	47.259	54.8511	57.1803	35.8427	49.3875	54.6516	37.4065	43.681	6.34423	9.40817	5.31741	11.2065	9.47416	9.26795	8.62062	9.19346
YBR195C	MSI1	8.92599	9.50209	9.8153	9.96636	9.09283	8.76412	9.15199	8.73445	1.37905	1.23982	1.2583	1.21276	1.54302	1.06888	1.40927	0.98488
YBR196C	PGI1	223.485	192.662	224.543	276.405	207.749	259.189	228.456	208.545	4.58186	2.81722	4.49682	2.87244	2.34224	1.47206	2.02874	1.42627
YBR196C-A	YBR196C-A	30.2735	32.973	35.1688	23.9541	27.8716	47.5458	40.4993	37.1249	1.91037	1.79469	1.59856	2.65823	1.89616	2.40371	4.75312	3.79128
YBR196C-B	YBR196C-B	51.3767	57.1311	66.4104	45.8918	55.8603	70.8287	51.6501	56.1437	6.36077	5.78923	7.97427	5.62991	6.07339	7.02425	12.3081	3.46261
YBR197C	YBR197C	7.11501	8.4135	9.57593	8.15219	9.77036	9.55483	6.46499	7.04933	1.9459	2.24603	1.89932	2.30489	3.22783	2.80893	3.18622	2.92412
YBR198C	TAF5	34.2588	38.9012	38.9922	32.1776	36.1389	42.2966	30.4081	31.2092	5.40142	8.39377	6.26678	7.50006	5.82564	4.94459	6.13361	5.27057
YBR199W	KTR4	129.208	127.76	131.794	101.747	125.468	115.752	103.485	109.127	84.5903	111.105	96.9344	113.617	90.3747	82.8814	88.0793	85.7792
YBR200W	BEM1	21.4454	19.9134	22.5596	16.4798	21.3535	20.2949	17.6564	17.6535	6.31914	12.9163	8.39905	14.3838	13.6316	12.6598	12.8469	13.7689
YBR200W-A	YBR200W-A	11.4493	12.5166	9.61817	9.27677	9.00832	3.1471	10.9823	12.9745	5.99789	10.3601	11.1646	11.6383	9.79173	11.0653	15.5567	11.98
YBR201C-A	YBR201C-A	112.652	101.109	95.0432	76.5684	89.7784	72.0145	70.0426	68.4823	198.793	209.17	201.464	242.719	260.717	228.431	253.413	247.872
YBR201W	DER1	26.0442	24.6336	23.7504	21.8705	24.5127	23.0001	22.7798	22.2506	2.67518	4.83937	3.13764	4.81928	4.13275	5.30907	3.7756	4.2522
YBR202W	MCM7	12.1363	12.7486	15.075	13.7827	14.2775	15.2128	11.5202	10.8725	1.73644	2.00735	1.63591	1.65313	2.67319	1.80212	2.45003	1.64774
YBR203W	COS111	32.7242	20.8114	19.9134	32.0833	21.6892	20.5337	28.3004	29.2627	28.9354	34.0331	31.2906	37.7942	87.7898	54.296	78.2327	58.3322
YBR204C	LDH1	28.0866	37.2948	41.3947	16.4801	35.3984	37.3639	25.0138	22.8866	13.6935	23.392	15.6693	25.4897	33.8234	30.3284	30.2275	31.1205
YBR205W	KTR3	24.9305	28.7497	31.3352	21.6409	29.4347	33.8863	23.1077	23.2397	6.58401	7.13335	6.46863	7.02269	8.48207	7.51482	7.48162	7.72076
YBR206W	YBR206W	60.6654	80.0586	80.3286	63.4857	72	95.3763	66.0859	63.023	13.6476	15.7716	13.3373	14.7644	14.0846	15.154	12.0173	11.901
YBR207W	FTH1	33.0091	39.0197	43.4563	26.058	36.7347	38.7319	32.0275	28.6608	34.9425	44.1447	36.2262	45.653	64.6284	55.0392	60.1216	55.8755
YBR208C	DUR1	22.094	21.5576	27.7223	8.13988	25.1354	13.3216	12.7645	11.6651	2.47656	1.92817	2.37498	1.90118	2.00343	1.9665	1.85941	1.91301
YBR209W	YBR209W	10.974	10.2373	7.94049	8.96383	8.20579	7.48133	10.407	12.4958	3.79569	9.41596	4.59885	6.98533	10.6615	11.0722	9.82692	8.09409
YBR210W	ERV15	43.9738	46.2195	46.6383	33.3784	37.844	41.6548	36.618	35.7622	2.73932	3.30603	3.35356	2.35902	2.57301	2.01836	2.68101	2.7224
YBR211C	AME1	32.5719	30.5693	26.0434	26.8146	28.2538	21.3764	25.3778	28.2452	9.15995	20.3837	11.5645	20.064	12.8086	13.8991	12.9497	13.8065
YBR212W	NGR1	88.5154	96.949	108.377	51.4291	99.2746	63.0469	66.1225	68.0129	57.6699	104.172	71.0088	108.874	121.508	116.37	114.632	123.477
YBR213W	MET8	14.4692	9.21899	10.4682	11.8384	12.0909	15.9286	11.6271	10.2853	15.4277	29.3659	19.633	31.9384	30.7639	31.0277	31.4379	33.8858
YBR214W	SDS24	270.329	211.298	237.09	205.864	216.397	152.052	221.263	204.825	131.53	148.934	144.912	158.588	217.427	156.547	210.854	160.102
YBR215W	HPC2	13.5517	14.2324	14.8266	10.794	14.1866	15.4367	11.1253	11.6106	2.16522	3.55003	2.56999	3.31644	4.61521	3.43497	4.36178	3.85466
YBR216C	YBP1	27.0274	25.0725	27.99	19.1458	24.6074	20.9309	24.0483	22.4732	1.00408	1.67087	0.942117	1.78761	2.38983	2.0906	1.98115	1.80822
YBR217W	ATG12	19.26	21.2312	22.6048	16.4839	21.1766	21.764	18.4257	18.6064	3.76018	8.85225	4.58843	8.36536	10.9317	9.69028	8.98	9.77725
YBR218C	PYC2	43.3318	49.1487	54.4285	47.2719	48.8682	58.7476	45.7878	41.7613	9.38613	13.2658	9.87486	12.8825	16.7848	12.8192	16.7149	13.0172
YBR219C	YBR219C	3.17982	2.77899	3.58753	3.0626	3.30359	1.34411	2.14012	1.16913	0.210648	0.151953	0.304153	0.522805	0.487382	0	0.269811	0.154193
YBR220C	YBR220C	25.7526	30.3234	31.2131	23.1613	29.7542	35.6101	23.3512	24.4794	4.242	8.74729	5.19384	8.50217	8.70036	8.43614	8.19093	9.04504
YBR221C	PDB1	139.124	190.164	225.522	98.9133	185.839	232.904	122.841	120.385	73.4324	53.2101	77.4632	60.8039	64.2494	63.6148	61.3518	67.1349
YBR221W-A	YBR221W-A	60.8909	72.8914	56.1053	37.9106	57.0747	69.7044	27.3442	46.9565	10.6013	8.27033	7.97427	8.847	19.0878	14.0485	9.67064	12.9848
YBR222C	PCS60	78.2668	92.0122	98.8318	61.0269	85.7923	93.6733	56.7411	66.8067	46.4693	26.9035	46.6316	31.4378	44.94	37.991	42.3756	42.758
YBR223C	TDP1	14.4405	15.2731	16.1033	11.1083	15.3266	15.1279	13.1256	11.9826	4.79997	8.39481	5.69503	8.74241	7.73114	8.0658	7.19114	8.79613
YBR223W-A	YBR223W-A	0	0	0	0	0	0	0	0	0	0	0	0	0	0	0	0
YBR224W	YBR224W	1.83641	2.32504	1.75139	1.17636	2.95666	0.735151	2.05667	1.63931	0.928876	1.66149	1.16544	2.54455	2.14771	1.99912	1.28942	2.14215
YBR225W	YBR225W	20.7433	18.5222	19.9475	14.3294	19.2615	15.3692	15.8794	15.8533	9.14414	19.9918	10.341	20.3515	26.5053	24.7151	23.4443	25.0424
YBR226C	YBR226C	22.4087	25.0273	21.5844	11.7309	16.6287	22.0414	16.6459	22.0128	6.3326	18.0544	7.65275	17.9701	19.5521	23.1985	19.0165	20.0922
YBR227C	MCX1	14.1926	16.4794	17.3705	14.3114	16.2828	18.1289	15.3903	13.3402	0.630126	0.752608	0.933001	0.565569	0.816721	0.596933	0.774005	0.664127
YBR228W	SLX1	20.916	25.528	23.1432	19.4695	21.6324	25.2276	20.1266	21.0691	2.46057	3.31241	2.84695	3.4605	4.56373	4.16716	3.2487	4.23625
YBR229C	ROT2	16.0192	19.1818	22.0255	11.0945	18.8095	24.247	14.2874	13.1452	2.48884	4.761	4.0533	5.56697	3.29332	3.43827	3.22349	3.32552
YBR230C	OM14	706.768	825.111	876.314	437.016	785.548	652.528	576.667	595.907	334.144	524.165	352.659	522.184	815.784	720.164	755.198	725.041
YBR230W-A	YBR230W-A	249.859	410.829	346.866	191.713	308.22	452.79	194.73	247.71	154.846	213.136	148.831	235.608	256.243	305.267	245.3	377.691
YBR231C	SWC5	11.6032	12.4155	12.4345	10.9802	12.3873	13.6898	10.248	11.1302	13.5698	22.7216	18.0344	23.9321	14.733	15.4151	15.3575	15.7229
YBR232C	YBR232C	4.65312	4.32633	5.52524	3.89378	5.95079	4.11423	4.39839	4.53292	0.551954	1.05274	0.580772	0.249667	0.892376	0.374912	0.806101	1.00796
YBR233W	PBP2	12.5795	11.0321	12.067	13.0363	12.5332	9.58066	11.4546	11.9493	1.20106	1.70914	1.62664	1.79581	1.67675	1.45457	1.98696	1.58873
YBR233W-A	DAD3	23.624	19.4517	21.5364	22.1852	21.9583	21.4888	23.7774	19.6916	3.20116	5.22971	4.87201	7.6628	7.55949	7.62003	8.00186	6.95421
YBR234C	ARC40	132.79	160.661	170.729	114.419	158.258	180.311	121.675	120.579	12.5632	23.6323	14.0499	22.3519	20.1669	23.6947	19.3223	22.8585
YBR235W	VHC1	14.0249	17.9032	18.6175	11.2302	16.4547	20.1967	13.6267	12.4301	4.00588	6.61848	4.12257	6.85132	7.91885	8.25559	7.6884	8.26739
YBR236C	ABD1	29.5145	33.9359	33.4674	22.4301	31.9978	38.1035	25.4523	25.5496	3.72878	6.77363	4.46879	6.64426	6.14534	6.93426	5.90245	6.91485
YBR237W	PRP5	18.6982	20.5927	20.5906	14.0596	18.9722	21.023	15.4217	15.9154	8.52103	13.9318	9.52512	14.1806	17.5278	16.4793	15.4836	15.7358
YBR238C	YBR238C	2.89755	2.17336	3.29097	3.81333	2.26423	4.06499	2.62993	2.58185	0.367765	0.320885	0.372684	0.23843	0.579627	0.249283	0.582556	0.34037
YBR239C	ERT1	7.59605	10.4554	10.2476	7.48389	8.98727	11.6915	7.68221	7.54424	3.19383	2.73081	3.17891	2.43461	4.04328	3.55926	2.83561	3.33469
YBR240C	THI2	6.92651	5.40045	5.51907	7.84982	5.07708	3.70512	6.23862	5.80104	1.0565	1.25073	0.885712	1.4802	1.22705	1.36505	0.925203	1.2065
YBR241C	YBR241C	37.9035	63.2006	57.8971	22.6571	48.1951	51.1006	26.0147	31.6547	143.737	80.0162	130.94	87.8486	130.453	114.026	121.215	125.057
YBR242W	YBR242W	43.7906	45.4222	38.4797	57.1644	43.828	41.1901	44.4191	58.6477	9.60759	18.6429	11.4404	19.0253	33.5601	33.6918	28.4628	36.8673
YBR243C	ALG7	30.3227	30.4801	32.4207	27.2556	33.6455	30.3095	28.254	27.7704	1.95431	2.11864	2.32643	2.27933	4.05644	3.1321	3.89129	2.91838
YBR244W	GPX2	45.49	40.6327	50.2641	72.6989	56.1778	70.1453	96.9797	110.406	0.910956	1.38069	1.04316	1.38665	3.56356	1.84983	2.92429	2.66154
YBR245C	ISW1	17.5431	17.4224	19.721	17.2674	19.0427	20.2316	16.2723	15.4665	0.673763	0.596175	0.764604	0.575761	1.12803	0.535977	0.843619	0.515721
YBR246W	RRT2	18.4005	19.507	21.9049	20.1089	20.3804	23.0041	20.5961	18.3727	0.57501	0.384208	0.632226	0.516637	0.703094	0.394061	0.795718	0.441972
YBR247C	ENP1	7.69102	5.19121	6.14803	15.5329	6.80443	7.00389	12.5323	11.11	1.28622	1.9202	1.54769	1.74257	2.8933	2.0862	2.69327	2.14072
YBR248C	HIS7	22.3009	19.6395	20.3227	36.6002	22.8674	18.4586	28.998	29.2308	0.95579	2.03474	1.20147	2.22508	1.64615	2.29912	1.93505	2.94829
YBR249C	ARO4	123.857	92.5808	108.64	165.41	116.972	107.162	150.982	140.919	2.05773	1.86569	2.53206	2.34766	2.33374	0.900144	2.40869	1.19811
YBR250W	SPO23	0.705746	0.920195	0.827594	0.719793	0.586689	0.786073	0.453288	0.768547	0.142292	0.249268	0.139552	0.252307	0.1623	0.139551	0.216295	0.11184
YBR251W	MRPS5	46.5721	56.5559	58.4814	44.0418	52.5938	60.41	45.1617	45.9743	3.91118	7.8866	4.42319	8.53826	7.14614	7.04257	6.4871	6.66354
YBR252W	DUT1	60.9972	42.743	45.4839	73.8641	50.4446	40.8146	73.9226	58.8387	1.82556	2.12987	2.36949	2.17853	1.31296	0.95525	0.846971	0.801656
YBR253W	SRB6	93.5544	83.1922	94.2729	70.5327	82.2331	75.6481	78.338	74.6191	11.458	24.4899	12.9407	20.057	20.7418	22.7562	19.4599	20.9556
YBR254C	TRS20	28.4503	30.7157	31.2604	27.2617	31.5702	31.2289	27.427	29.331	1.5894	2.46918	1.5912	2.2133	2.41287	1.97	2.61198	1.45027
YBR255C-A	YBR255C-A	58.01	81.7755	80.838	42.319	67.1172	82.4163	46.508	49.0129	7.34714	8.32777	8.21261	8.82004	10.9058	10.9985	10.1621	11.4273
YBR255W	MTC4	18.2142	20.79	20.0215	13.6624	18.3561	19.9208	14.7104	15.2722	3.5085	7.1015	4.46097	7.17938	12.0976	10.9587	10.626	9.977
YBR256C	RIB5	114.084	134.508	126.877	79.7145	124.93	128.527	87.2351	102.897	12.4705	22.5646	12.9946	21.3014	26.9498	26.1217	26.1012	27.6433
YBR257W	POP4	16.2956	14.7259	15.982	14.7361	15.8352	15.2244	14.0372	14.4019	4.75689	14.1234	6.87026	14.5407	12.4798	12.2733	10.8812	12.706
YBR258C	SHG1	20.9651	22.8747	24.5317	21.5978	21.6795	29.461	19.9281	17.9215	3.55097	8.29627	4.20526	9.07315	7.98294	8.26267	6.51103	6.83624
YBR259W	YBR259W	5.29153	4.66383	5.24717	4.51768	4.91508	6.17138	5.26238	4.21271	0.568083	1.18598	0.744398	1.38326	1.79208	1.42581	1.22641	1.24761
YBR260C	RGD1	15.8243	15.8267	18.3815	15.425	15.9028	17.8095	15.2151	14.2934	4.38134	9.60093	5.24566	9.39764	9.03349	9.15748	8.44257	9.33095
YBR261C	TAE1	28.3023	25.1467	26.8669	35.4777	27.4816	30.2594	30.502	27.5762	2.58366	5.1756	3.47723	5.51939	3.67912	3.55867	3.10733	2.9717
YBR262C	MIC12	91.0571	128.838	157.768	81.9986	115.642	168.153	87.9915	84.5083	56.6326	119.489	64.8637	115.171	124.006	130.491	116.814	136.843
YBR263W	SHM1	123.655	154.469	158.417	131.097	151.418	175.124	115.954	129.246	43.8443	45.5635	46.6812	50.8715	54.722	62.4757	54.732	68.7811
YBR264C	YPT10	36.4981	33.5406	34.0482	27.9894	35.8742	30.9341	29.7153	31.6904	5.45675	8.86826	5.11424	8.65607	10.2777	8.65426	7.78686	7.38953
YBR265W	TSC10	68.0032	63.6123	65.2119	63.7544	65.5605	47.3534	61.5431	60.2758	10.0354	19.0801	10.9822	17.1123	20.4582	18.7658	18.2119	16.748
YBR266C	SLM6	0	0	0	0	0	0	0	0	0.113055	3.86091	1.0147	0.469289	1.45485	3.26499	2.33448	1.69911
YBR267W	REI1	10.9656	9.40812	9.89652	20.2197	10.3908	10.0016	15.9883	16.0865	7.94101	16.2735	9.44257	15.5354	12.0002	10.7328	11.0955	9.83468
YBR268W	MRPL37	140.139	175.719	163.481	131.989	157.804	193.781	121.692	130.391	78.7817	131.516	90.2966	134.318	144.257	138.139	137.894	135.07
YBR269C	SDH8	156.359	197.7	212.17	109.106	179.299	179.87	123.782	130.65	186.886	210.766	193.758	229.025	298.338	259.922	278.405	277.255
YBR270C	BIT2	12.0902	17.4791	16.6789	10.1296	15.3327	16.8052	10.6178	11.6423	3.79624	6.12306	3.64638	5.70764	9.43323	9.39498	8.67701	8.88613
YBR271W	EFM2	6.16642	6.36822	6.43498	8.72636	5.89851	9.05129	7.94322	6.63828	1.29285	2.62192	1.61467	2.53382	3.36798	2.43987	3.30505	2.64808
YBR272C	HSM3	32.5989	36.6275	36.048	25.6072	30.9929	30.6625	28.2569	28.3251	4.92006	4.10257	4.88439	4.39339	6.37705	5.0603	5.41128	5.8763
YBR273C	UBX7	38.9271	44.1113	49.1095	30.1715	42.2851	43.0744	36.2542	33.6019	6.15248	10.1386	6.32977	9.99454	14.758	14.2117	14.9037	14.792
YBR274W	CHK1	17.26	19.0009	20.89	13.2543	19.3905	18.2085	15.445	14.5636	5.01327	6.84996	5.26792	7.82366	9.21008	8.64773	7.50626	8.31672
YBR275C	RIF1	3.44733	2.75263	3.42083	3.21321	3.27996	3.55578	3.27583	2.68137	0.236161	0.167666	0.268281	0.248635	0.330396	0.207036	0.248023	0.182407
YBR276C	PPS1	29.6453	32.3747	34.581	25.1195	31.5693	35.4918	24.8666	26.1319	6.36989	9.29974	8.09027	9.40423	6.06719	6.99547	6.22486	6.95939
YBR277C	YBR277C	2.48868	1.71335	2.96672	2.00867	2.92872	2.24318	2.36629	2.81289	0.557629	2.17783	0.734978	1.10857	1.19979	0.631758	1.03655	1.117
YBR278W	DPB3	47.2912	55.5238	46.2946	41.9285	50.3514	41.984	39.9047	48.8725	12.3183	20.3442	12.9483	20.8545	14.6548	16.5418	13.0335	16.2852
YBR279W	PAF1	114.383	113.147	100.105	104.167	103.805	102.905	91.1762	105.809	28.3222	40.4342	31.2537	42.0987	25.184	28.2392	23.6568	26.6965
YBR280C	SAF1	50.8165	60.5104	60.1998	29.2929	55.5615	47.3867	37.864	41.9161	27.7353	22.4195	29.2102	26.2535	48.4875	42.9461	44.1402	46.738
YBR281C	DUG2	12.5193	11.8968	16.5448	6.81546	13.9575	19.7688	10.474	8.02865	0.555603	0.737011	0.566906	0.613888	0.653986	0.646986	0.793069	0.54624
YBR282W	MRPL27	86.5575	96.749	102.92	79.6086	91.466	102.865	74.0938	73.9224	20.7337	41.3089	25.5794	38.7025	28.3712	31.2548	28.7356	29.5791
YBR283C	SSH1	160.892	178.482	179.013	160.367	172.134	189.483	153.95	151.683	12.0531	17.8986	13.555	17.6274	15.8056	15.5438	14.297	13.7682
YBR284W	YBR284W	10.1287	9.91798	9.3838	10.9596	8.90118	7.02727	7.20366	9.36636	2.59665	3.02912	2.65345	2.33922	2.74331	2.47563	2.7828	2.0082
YBR285W	YBR285W	171.605	170.035	162.389	114.236	152.258	105.187	127.862	155.144	26.3975	57.0109	29.2101	58.7028	55.9682	54.8248	47.1563	51.8242
YBR286W	APE3	718.714	821.993	814.389	620.449	762.416	670.074	571.256	660.787	298.746	266.261	289.204	272.408	360.697	350.143	324.972	340.655
YBR287W	YBR287W	145.293	132.911	144.004	117.896	134.849	127.34	129.818	122.885	55.6499	85.1645	65.631	96.544	123.028	103.716	113.057	108.509
YBR288C	APM3	27.4333	30.0292	30.6458	24.6245	29.784	33.7759	26.3046	25.5055	0.694975	1.45313	0.937336	1.50438	1.82878	1.38656	1.57655	1.32113
YBR289W	SNF5	11.2331	9.28581	10.2839	11.0055	10.0205	10.7794	8.8382	9.40926	0.788858	0.943908	0.961196	0.924195	1.19943	0.864466	1.11372	0.793523
YBR290W	BSD2	73.6879	66.8448	69.2841	61.8602	62.5597	55.6754	62.5118	64.8538	49.8547	96.793	56.2125	97.9426	112.604	94.7255	97.9203	91.3909
YBR291C	CTP1	16.9995	21.8176	21.9618	14.7676	21.3597	17.0878	15.3796	16.764	4.1486	9.00514	5.08419	9.49633	8.26268	7.56621	6.97555	7.87274
YBR292C	YBR292C	10.928	14.034	13.4681	5.04966	10.3341	12.4565	7.37593	8.63342	1.47391	5.4097	2.28851	4.04043	3.32427	2.87626	3.1421	3.67738
YBR293W	VBA2	6.75915	6.64081	11.5786	5.74283	7.30816	7.77064	7.33092	7.34601	2.6383	4.0948	3.79645	5.3396	4.94863	3.40473	6.07913	5.41089
YBR294W	SUL1	2.95695	3.70526	4.87053	3.03514	3.11406	7.59572	2.96339	2.79027	7.12849	5.92436	8.19384	6.88531	8.93522	6.83937	9.24469	8.21852
YBR295W	PCA1	8.82698	9.29082	10.0638	7.44197	9.16225	13.0573	8.14911	8.40037	4.73764	9.13214	5.87956	8.75437	10.1537	10.3266	9.1713	10.3866
YBR296C	PHO89	48.0137	35.7817	55.1742	57.3013	40.8133	30.0141	42.2465	36.3141	27.6464	67.2445	36.5842	72.9103	86.7782	70.2221	99.2554	78.3174
YBR296C-A	YBR296C-A	23.7001	32.5173	35.054	24.509	24.0538	26.2891	27.3014	27.6326	15.1005	27.7379	17.8799	44.8465	40.5507	35.7855	43.6679	52.3464
YBR297W	MAL33	32.9701	33.3292	41.1351	24.6102	31.4756	36.4418	28.6188	27.7331	9.56689	11.9215	9.49907	11.9712	16.9093	12.6096	17.5374	12.1187
YBR298C	MAL31	50.7648	61.6086	69.9982	40.1399	54.6491	57.5276	57.4736	47.6794	7.27472	5.78747	7.47775	6.29233	18.1644	12.2403	15.355	11.7453
YBR298C-A	YBR298C-A	0.251958	0	0	0	0	0	0	0.272192	0	0	0	0	0	0	0	0
YBR299W	MAL32	9.6383	12.7639	16.9881	6.28202	11.194	17.2448	8.13072	8.46157	2.27354	3.75349	2.34582	3.71111	4.36721	3.35198	4.01219	3.1671
YBR300C	YBR300C	0.824721	0.79434	1.02557	0.513147	0.612635	0.678276	0.851889	0.815349	0	0	0	0.14461	0.0525479	0	0	0
YBR301W	PAU24	0.217858	1.4616	1.62284	0.595651	0.787242	0.412857	1.25404	0.863755	0.0968978	0.0823904	0.213981	0	0.173108	0	0	0.0839308
YBR302C	COS2	2.1286	2.76053	2.88043	2.07242	2.35055	2.86221	1.93321	2.05783	0.914283	0.700044	0.873353	0.73547	0.597275	0.655719	0.501884	0.689838
YCL001W	RER1	126.825	99.4623	104.71	98.097	100.53	85.994	104.634	102.844	8.30876	14.0951	10.8616	13.3217	8.98202	9.2539	8.67759	8.44032
YCL001W-A	YCL001W-A	1.47925	1.5347	1.57636	1.8183	1.01655	1.34901	1.1065	1.36003	0.451512	0.835048	0.284348	0.539161	0.294068	0.224281	0.113801	0.430229
YCL001W-B	YCL001W-B	6.13064	5.27573	5.20066	6.2486	6.19003	8.38201	4.62543	3.9337	1.15059	3.06788	3.07975	2.39315	1.96085	1.2807	2.22504	1.85196
YCL002C	YCL002C	32.4655	33.072	33.5459	29.9885	30.1467	34.6299	29.5503	32.1958	3.45792	9.06155	4.61838	9.02059	7.61223	7.07301	6.45181	7.50169
YCL004W	PGS1	21.3611	19.8032	21.6621	19.2523	20.3723	20.1224	18.5134	17.8406	4.70628	6.89012	5.11549	6.77232	4.55131	4.6951	4.5134	5.02078
YCL005W	LDB16	39.1976	41.4125	40.0471	34.0103	38.4903	37.1569	31.5928	32.6597	11.6628	20.1504	13.8269	18.3723	9.6417	11.0232	10.1115	11.3465
YCL005W-A	VMA9	428.04	475.975	500.154	412.657	486.844	582.763	464.762	444.444	38.319	63.8616	37.7861	59.6505	47.7364	50.8998	57.4492	51.2935
YCL007C	YCL007C	6.12505	8.50569	6.69191	6.0748	5.38123	6.27605	6.15288	6.37132	2.40059	5.32888	3.37693	5.23558	2.58809	2.98728	2.43248	2.67244
YCL008C	STP22	34.783	53.0735	50.1249	30.9401	46.607	49.1561	29.9011	34.4929	3.40371	3.94926	3.4347	3.21598	2.05128	2.11447	1.97578	1.87393
YCL009C	ILV6	157.541	197.663	204.13	178.705	192.886	234.596	160.432	166.869	64.2709	73.4543	66.0461	72.3232	58.0982	57.893	59.4071	62.6372
YCL010C	SGF29	54.193	60.9346	63.2527	45.5113	61.1101	56.2396	47.3977	48.3867	34.0821	44.9148	36.7338	42.1032	35.0648	36.0379	34.954	33.1234
YCL011C	GBP2	142.19	169.765	165.15	143.475	161.29	177.473	135.684	144.543	46.8662	61.1173	48.728	57.2315	48.2917	48.7241	43.2824	45.8902
YCL012C	YCL012C	71.2581	75.6817	83.7901	52.9482	78.753	84.8833	60.5482	68.8679	76.091	56.9804	75.6157	71.2823	90.5222	83.421	78.6766	89.7746
YCL014W	BUD3	3.03502	2.08242	2.73917	3.1302	2.55119	2.82328	2.86515	2.6932	1.79709	2.73436	2.0246	2.34441	2.23316	1.71651	2.02216	1.67498
YCL016C	DCC1	20.858	24.0312	24.5672	16.2899	23.0734	23.5714	18.2066	17.9353	5.792	9.57201	6.94634	9.05358	4.95539	5.78732	6.65826	6.32145
YCL017C	NFS1	74.4589	77.9355	84.4682	71.0041	80.3263	86.9822	69.4159	69.3497	119.335	158.371	130.407	172.387	140.494	134.751	136.46	144.248
YCL018W	LEU2	79.2556	84.7529	76.1775	127.235	67.4747	79.1833	76.7326	72.2687	2.11206	2.40403	2.20383	2.51441	1.64254	1.58837	1.40047	1.50988
YCL019W	YCL019W	0.971684	1.0568	0.911364	1.11003	0.790885	0.757326	0.887656	0.863475	0.209843	0.123018	0.1594	0.294577	0.249759	0.157001	0.386302	0.229687
YCL020W	YCL020W	0	0	0	0	0	0	0	0	0	0	0	0	0	0	0	0
YCL021W-A	YCL021W-A	5.13013	4.9079	5.06123	4.04976	4.3296	5.0279	3.99983	3.29827	3.36955	3.89482	4.25877	4.379	3.80321	2.87497	3.45163	4.32568
YCL022C	YCL022C	1.43983	0.576655	1.49794	2.57991	0.905524	1.10775	2.15221	0.416859	0.509952	0.376238	0.963473	0.174664	0.809123	0.33992	0.501337	0.0727544
YCL023C	YCL023C	2.35825	0.349849	1.56522	4.26985	0.807956	0.832519	1.57885	1.54428	1.19828	1.48925	1.35761	0.938771	0.83662	0.490205	0.679597	1.03203
YCL024W	KCC4	2.58821	1.84414	2.36101	4.29045	2.17997	1.78526	2.89111	2.5962	0.560485	0.66348	0.722166	0.603246	0.737653	0.56063	0.60787	0.518338
YCL025C	AGP1	90.2117	72.1861	70.1223	78.77	73.5058	37.2994	68.8766	63.1371	45.0477	43.3688	58.4452	51.3259	90.118	63.088	76.2101	68.8466
YCL026C-A	FRM2	8.1348	3.12769	5.53973	5.18336	7.54632	2.32149	8.50126	3.57792	0.289467	0.438465	0.270166	0.19288	0.252237	0.358162	0.24368	0.190908
YCL026C-B	HBN1	15.4609	12.5604	15.5584	10.0677	15.2134	22.592	11.3176	12.3463	15.1488	33.5625	18.2024	27.8905	18.7917	24.6734	15.5955	25.4289
YCL027W	FUS1	2.32441	3.53014	3.61989	1.59459	3.69596	3.35694	2.01189	2.436	0.650872	1.03313	0.61247	0.857284	1.04831	0.940912	0.996727	1.01941
YCL028W	RNQ1	45.0164	59.8443	65.7354	36.2236	58.3744	65.3322	41.1588	41.3088	19.0649	31.954	21.8433	35.2625	26.9166	29.8796	25.569	30.3435
YCL029C	BIK1	9.65099	12.6624	13.78	9.57167	12.8173	15.4491	9.93437	9.84025	3.05581	4.33932	3.22289	4.54155	2.74511	2.97112	2.42411	3.44178
YCL030C	HIS4	41.4042	42.2837	43.6731	55.5375	41.2333	42.2608	47.2944	48.9495	39.6387	44.784	39.9582	45.4889	20.9206	27.5603	25.114	29.0861
YCL031C	RRP7	43.3251	33.9295	39.539	38.8441	38.3596	33.8112	39.9632	37.8316	6.91644	14.3388	8.28669	15.3676	9.82334	9.45752	8.19363	9.32628
YCL032W	STE50	28.8351	36.5283	38.8462	24.6683	35.0398	40.6265	28.0741	27.0597	5.3398	7.12211	4.95264	6.57157	5.85228	7.34885	6.52704	7.29784
YCL033C	MXR2	65.253	88.2393	82.2421	53.4995	74.5901	85.6715	56.5922	58.9893	30.4811	39.6158	29.4471	39.8151	47.9106	53.3791	50.9285	55.8212
YCL034W	LSB5	89.0157	114.929	112.728	70.8282	100.467	104.962	70.8739	80.4785	67.0105	98.5043	72.5681	100.035	90.9477	93.3647	89.0324	99.3181
YCL035C	GRX1	609.194	771.945	700.825	529.809	679.378	649.116	541.417	641.489	242.106	297.885	273.653	336.79	303.771	342.552	317.938	380.296
YCL036W	GFD2	3.54687	4.41406	4.18332	7.60107	3.82615	4.6568	5.36579	6.36916	0.825348	1.38109	1.03162	1.28177	1.38387	1.61837	1.25473	1.93542
YCL037C	SRO9	2.68651	2.32727	2.62084	2.61222	2.37134	4.06791	2.35506	2.15398	0.80826	0.732171	1.03386	0.551882	0.739469	0.388078	0.697192	0.525161
YCL038C	ATG22	16.5524	20.2179	21.9204	10.1595	17.7135	22.5719	11.6899	12.5815	5.22793	7.79862	5.81896	8.37456	10.7101	13.2777	9.80887	13.0794
YCL039W	GID7	38.7838	41.3764	44.2604	25.0358	40.628	35.1054	30.0159	30.1923	17.9058	25.8365	20.1292	25.2213	20.4186	21.1283	21.191	20.9619
YCL040W	GLK1	1472.58	1851.68	1861.1	1081.37	1656.02	1635.66	1126.42	1338.34	898.61	937.147	961.53	991.831	1024.11	816.663	954.212	844.395
YCL041C	YCL041C	20.2055	25.7385	21.6863	17.9912	23.7756	22.5083	14.8041	20.6333	7.8954	11.9909	8.33594	10.5272	8.66021	6.91615	7.24314	6.73147
YCL042W	YCL042W	191.016	244.625	232.978	147.624	214.718	199.272	133.259	152.998	104.87	126.466	117.714	116.691	137.395	97.7949	126.545	95.9281
YCL043C	PDI1	578.357	605.736	518.66	551.43	580.599	534.305	420.298	564.342	143.213	185.581	167.697	200.731	141.127	151.621	141.263	158.088
YCL044C	MGR1	44.3013	40.8386	42.1487	41.9547	42.4834	35.8429	35.7481	39.8082	14.0791	19.5579	15.7591	20.3376	10.4176	11.9661	10.6687	12.9954
YCL045C	EMC1	46.7099	46.5502	53.622	41.8713	47.9463	49.1238	42.3073	40.1479	1.94686	2.1072	2.12311	1.86325	2.13234	1.77331	2.06574	1.38956
YCL046W	YCL046W	20.2649	17.2119	21.1714	16.5442	16.8645	13.8314	13.8605	16.5066	0.801482	1.38046	1.21202	0.726958	1.04895	1.32353	1.54858	0.845563
YCL047C	POF1	32.4081	24.447	26.0336	30.0161	24.6959	20.033	28.8837	27.6196	0.962324	1.17054	1.37827	0.947806	1.43354	0.673679	1.3829	0.750655
YCL048W	SPS22	1.28685	1.24001	1.36531	0.909932	1.18291	1.36197	1.0237	0.982867	1.50161	1.63289	1.9208	1.94601	1.93244	1.44148	1.57103	1.34761
YCL048W-A	YCL048W-A	13.1675	17.7976	15.7199	9.19855	17.1544	15.3537	7.3491	15.6538	50.826	62.5847	65.1245	62.1352	58.268	60.8222	61.33	77.0674
YCL049C	YCL049C	71.561	97.3031	92.7586	64.4289	82.7636	143.463	62.9317	71.749	117.246	92.0574	112.894	92.3126	62.2543	72.5725	61.2072	69.9868
YCL050C	APA1	87.0656	67.8993	75.6712	118.188	74.2642	77.8515	93.5539	87.8432	237.841	229.272	259.076	233.343	164.785	134.742	158.392	129.868
YCL051W	LRE1	24.2084	26.8606	30.1554	22.6938	26.6923	25.7816	24.2867	22.2353	9.38348	13.6941	10.5673	13.1587	11.601	10.7359	11.3768	11.4458
YCL052C	PBN1	52.6199	69.459	72.5615	39.0237	62.4034	72.0577	46.6261	47.9341	29.4046	39.0238	33.6083	42.0203	45.5207	42.9713	43.1042	44.319
YCL054W	SPB1	11.8448	11.4227	10.6515	21.6714	11.8103	16.1169	20.055	17.2563	1.09009	0.934441	1.40087	0.943582	1.22802	0.75356	1.25272	0.492186
YCL054W-A	RDT1	3.44871	4.97302	2.93902	2.48311	3.03742	0	0	3.65971	0	0	0	0	0	0	0	1.03993
YCL055W	KAR4	14.1188	15.0252	14.9913	10.8789	14.8347	16.3183	11.5241	11.691	1.3319	1.58289	1.33259	1.95096	1.93677	1.48112	1.46495	1.51719
YCL056C	PEX34	28.4158	38.4666	36.4919	23.6616	35.0648	50.9392	30.2809	29.198	5.50774	10.804	6.50849	10.8292	13.4272	16.2193	12.7416	15.5591
YCL057C-A	MIC10	288.181	392.387	388.248	289.316	366.623	433.024	285.554	306.216	330.276	330.479	315.12	352.994	378.331	361.509	343.308	353.569
YCL057W	PRD1	52.8439	83.3866	83.7391	42.7624	70.8418	102.93	40.6496	51.0609	8.73702	9.32004	10.9499	10.72	5.66981	6.67759	5.92538	7.0604
YCL058C	FYV5	38.5189	41.5728	36.6269	41.3933	34.0575	45.5984	43.9714	42.3158	25.6796	35.6446	27.3363	35.3981	33.2012	31.1027	30.5723	26.6722
YCL058W-A	ADF1	0	0	0	0	0	0	0	0	0	0	0	0	0	0	0	0
YCL059C	KRR1	24.3817	24.0636	22.3515	39.8878	26.0907	28.9249	32.4625	33.1122	3.60619	5.83445	4.62814	4.75862	4.60069	3.15847	4.54187	3.07555
YCL061C	MRC1	4.69416	5.09257	6.17376	4.81357	5.28115	6.23551	4.89083	4.0319	0.302783	0.326239	0.327189	0.325401	0.337315	0.313017	0.291918	0.261026
YCL063W	VAC17	9.74764	6.96782	9.02035	8.40728	9.63345	7.95348	10.6673	7.69327	0.953063	0.769024	0.83659	0.539166	0.809082	0.607006	0.809658	0.583622
YCL064C	CHA1	8.73338	4.75415	8.21648	6.04168	7.01343	5.4387	10.3357	5.90686	1.2955	1.29038	1.26929	1.29996	1.39622	2.23518	1.45566	1.66728
YCL065W	YCL065W	0	0	0	0	0	0	0	0	0	0	0	0	0	0	0	0
YCL066W	HMLALPHA1	1.37044	1.71277	1.32229	1.14545	1.45708	2.79759	1.11272	1.25122	0.979516	0.914513	1.08667	1.35011	0.337801	0.412325	0.606354	0.725133
YCL067C	HMLALPHA2	39.0495	33.4794	35.0687	37.096	32.2374	30.288	35.0582	37.674	29.2069	45.4213	39.5993	56.2388	41.5535	38.4677	38.0672	38.8799
YCL068C	YCL068C	0	0	0	0	0	0	0	0	0	0.0580434	0	0.0585088	0	0	0	0
YCL069W	VBA3	0.810128	0.916369	1.26704	0.409381	0.935293	0.838082	0.651577	0.683813	0.287521	0.406544	0.360578	0.439459	0.525988	0.446914	0.361616	0.5546
YCL073C	GEX1	0.236322	0.279986	0.225013	0.126265	0.170169	0.206003	0.117108	0.178171	0.369957	0.284256	0.507485	0.354074	0.0574128	0.300418	0.144387	0.151671
YCL074W	YCL074W	0	0	0	0	0	0	0	0	0	0	0	0	0	0	0	0
YCL075W	YCL075W	0	0	0	0	0	0	0	0	0	0	0	0	0	0	0	0
YCL076W	YCL076W	0.0340196	0.249598	0.168943	0.071641	0.0433773	0	0.0372343	0.143522	0	0.0287663	0	0.083469	0	0.0570115	0	0.0273784
YCR001W	YCR001W	12.9627	8.69888	9.03173	7.66303	7.86462	7.75847	11.1517	9.54232	0.514689	1.97758	0.719776	1.52202	0.774514	2.57542	0.752033	1.44189
YCR002C	CDC10	84.6165	78.5599	86.5364	76.5655	83.9316	77.4723	69.5195	76.1854	11.2406	19.5397	13.4154	17.406	9.23586	10.0583	8.35399	8.90035
YCR003W	MRPL32	54.4298	56.2493	55.4889	51.6842	54.2824	61.4483	44.3761	49.332	17.1254	29.1433	18.7092	23.3503	12.6329	15.0297	10.1505	14.868
YCR004C	YCP4	460.252	564.484	551.22	344.737	495.325	457.912	367.391	415.172	452.61	772.203	531.868	828.152	772.142	782.027	718.548	850.183
YCR005C	CIT2	586.873	262.722	230.4	392.201	294.2	104.527	414.341	379.344	643.747	839.324	724.137	833.225	830.621	701.417	776.042	641.329
YCR006C	YCR006C	13.757	10.3299	11.2478	11.3006	10.7521	9.69593	10.6284	10.3089	14.1499	17.8905	13.9894	17.1674	22.5698	20.2618	21.0648	22.2792
YCR007C	YCR007C	21.3482	23.7781	21.956	14.7273	18.6036	20.8233	18.0425	18.0284	27.4837	41.0159	27.9008	39.2967	37.2354	39.2501	35.2638	41.7523
YCR008W	SAT4	73.2792	58.8803	60.7228	69.0082	59.2536	47.7967	61.0193	61.2575	115.111	133.452	130.984	148.218	142.443	131.171	130.394	139.885
YCR009C	RVS161	145.664	137.218	146.594	134.235	139.422	118.618	135.24	134.762	29.1335	38.2731	33.8419	38.3887	32.3786	32.0045	32.0061	31.9705
YCR010C	ADY2	52.1631	32.7758	28.7709	44.2769	32.173	9.5029	42.9557	38.1883	768.253	1042.98	933.437	1204.33	847.24	909.206	774.192	955.357
YCR011C	ADP1	57.0263	75.5898	71.9542	41.6228	66.4215	67.3585	45.9999	52.6304	13.4745	20.9349	15.3116	21.7169	25.8514	26.8614	24.3211	25.3723
YCR012W	PGK1	1929.75	1469.94	1561.96	2505.83	1605.98	1218.73	1840.62	1875.45	4.55554	3.61097	5.65678	3.93889	2.12446	1.57417	2.42108	1.91489
YCR013C	YCR013C	2223.24	1880.66	1825.96	2615.65	1794.09	1636.89	2230.78	2069.81	33.4542	30.5602	36.8936	33.4935	10.1529	10.0654	9.55544	12.9311
YCR014C	POL4	8.40005	8.01513	9.67299	7.90507	8.36704	8.67451	8.28532	8.30919	0.783441	0.548379	0.99146	0.825248	2.14049	1.79617	2.3373	2.22401
YCR015C	YCR015C	10.4799	9.97512	10.1292	9.60579	10.2312	10.421	10.6161	10.4461	0.22029	0.190222	0.302618	0.0408669	0.111243	0.145856	0.192991	0.140172
YCR016W	YCR016W	40.3618	45.0755	41.3106	53.1699	46.7314	53.9232	55.2392	57.8895	2.13486	1.90712	2.28218	1.79851	2.77645	1.4182	2.00769	1.18396
YCR017C	CWH43	40.7255	47.4069	51.5997	33.3434	44.5983	50.6754	35.8331	34.5541	13.5209	14.3299	13.9451	14.9057	12.81	11.2579	11.3292	10.6221
YCR018C	SRD1	3.78583	4.41451	4.30459	3.02478	3.56289	3.48511	4.05993	3.83301	1.20359	3.28889	1.20765	2.69983	1.99544	2.41032	2.26468	2.15565
YCR018C-A	YCR018C-A	159.33	213.841	177.302	101.588	147.413	196.855	119.598	161.177	13.5756	38.8086	13.8592	40.0073	40.0521	44.0991	27.7819	31.8133
YCR019W	MAK32	19.4675	17.5875	18.2404	14.265	17.3491	14.379	15.0281	17.4123	1.64324	2.42978	2.25641	2.05282	3.39041	3.02776	3.70413	2.97855
YCR020C	PET18	62.0624	45.506	55.0334	55.0278	51.7545	32.0514	57.3121	51.3625	1.77598	2.8939	2.03959	2.76664	2.90474	2.22757	3.40105	3.02679
YCR020C-A	MAK31	34.7008	33.9498	38.6717	47.0276	39.8475	46.1839	46.2299	46.0695	4.55793	5.62446	4.78052	6.16807	9.89467	7.89942	10.3583	7.18616
YCR020W-B	HTL1	59.1327	37.1218	48.0831	62.6635	42.8431	35.8029	65.1929	56.2592	2.3622	3.35561	3.09175	4.47945	5.63098	4.25705	5.6902	3.92577
YCR021C	HSP30	67.563	28.3019	28.5864	185.853	36.1818	12.5971	129.772	110.499	2296.24	884.256	2099.42	1043.94	771.816	562.419	782.179	607.482
YCR022C	YCR022C	6.32519	5.61714	8.34879	4.61657	7.38216	4.58157	4.08084	4.80615	0.51044	0.533309	0.306195	1.0397	0.565961	0.728594	0.916215	0.349413
YCR023C	YCR023C	22.2384	27.4612	27.7331	16.7781	25.0181	25.1034	19.5498	19.8263	18.7241	6.83834	18.5519	7.39825	5.51964	4.59783	5.67536	4.64826
YCR024C	SLM5	16.62	21.2753	23.6774	16.7546	20.4495	25.8091	16.0606	15.6498	1.55435	3.0754	2.13497	2.84878	3.34186	3.40094	3.11398	2.87518
YCR024C-A	PMP1	2470.67	2045.29	2537.29	2028.39	2161.57	2275.5	2225.72	2139.86	256.398	251.731	315.082	285.515	449.684	344.822	463.728	457.433
YCR024C-B	YCR024C-B	1630.59	1436.79	1548.59	1295.49	1194.12	1503.2	1603.41	1533.75	32.4899	45.98	42.5343	59.8989	73.7603	57.7828	65.3595	60.7301
YCR025C	YCR025C	14.8391	19.3825	20.2986	13.8745	16.7062	17.439	15.2173	15.4307	4.07663	3.53786	3.48012	2.97794	4.02556	3.17816	3.48533	3.69729
YCR026C	NPP1	16.3154	17.2575	19.3468	12.9678	16.9882	18.8373	15.2792	14.1484	8.39425	12.2661	10.0033	11.9578	14.9146	14.3925	14.8878	15.7331
YCR027C	RHB1	30.4319	26.6893	28.071	27.5595	28.4564	28.7801	28.1188	27.1395	4.00724	5.43793	4.81293	5.46977	4.71389	5.34295	4.51649	5.19685
YCR028C	FEN2	17.9008	16.9028	20.2891	15.5849	18.1521	19.1654	16.5749	15.4329	5.10011	8.42301	6.28802	8.44366	9.20464	9.44485	8.99515	9.3465
YCR028C-A	RIM1	166.966	155.445	169.494	150.327	155.331	161.567	160.991	145.516	10.3948	10.6024	10.6819	11.071	16.1503	11.3604	11.8243	10.8964
YCR030C	SYP1	70.2673	72.4589	84.2002	49.0706	74.8816	67.9675	57.1672	55.8601	6.46577	6.11087	6.6292	5.71761	6.54652	6.34684	6.53796	6.34995
YCR031C	RPS14A	2292.36	2492.13	2596.45	2606.18	2656.24	2992.83	2593.71	2508.41	41.1042	48.8276	46.3206	50.3116	25.9925	27.0881	23.3734	26.795
YCR032W	BPH1	5.94905	7.58346	7.33108	4.42596	6.83544	8.55805	5.03944	5.36784	0.82397	1.23483	0.965483	1.23821	1.15908	1.44643	1.1754	1.31539
YCR033W	SNT1	20.9197	26.8001	25.6836	19.4644	23.5729	30.9069	20.3546	20.0318	22.6519	33.4019	27.2581	36.1976	38.5887	36.1817	36.7181	37.5772
YCR034W	ELO2	32.8755	25.0651	31.2912	37.9353	30.7008	36.6022	39.4107	31.6429	1.00348	0.854022	0.92644	0.862218	0.579238	0.672569	0.44263	0.520763
YCR035C	RRP43	25.8294	24.409	26.5032	26.062	25.262	27.6541	26.1493	25.1026	6.46952	11.4859	8.696	13.0458	9.7442	9.00387	9.81606	9.55269
YCR036W	RBK1	48.0205	49.7558	54.3184	36.4581	47.4298	63.0405	41.9066	40.3206	18.4135	34.7337	25.4005	38.7974	32.0282	35.2349	30.8838	41.1473
YCR037C	PHO87	13.3861	16.9549	20.6975	14.1279	16.5396	25.0044	13.2898	12.5668	1.52413	1.65424	2.05333	1.7897	1.95478	1.43955	1.95774	1.56567
YCR038C	BUD5	7.31701	7.73072	7.52767	5.98433	6.36339	6.18798	6.21851	5.80308	3.32772	4.57318	4.39508	5.02087	3.68132	3.19621	3.238	3.34175
YCR038W-A	YCR038W-A	0	0	0	0	0	0	0	0	0	0	0	0	0.90255	0	0.0676597	0
YCR039C	MATALPHA2	39.0495	33.4794	35.0687	37.096	32.2374	30.288	35.0582	37.674	29.2069	45.4213	39.5993	56.2388	41.5535	38.4677	38.0672	38.8799
YCR040W	MATALPHA1	1.37044	1.71277	1.32229	1.14545	1.45708	2.79759	1.11272	1.25122	0.979516	0.914513	1.08667	1.35011	0.337801	0.412325	0.606354	0.725133
YCR041W	YCR041W	12.2246	18.9946	17.1503	13.5556	15.8566	28.2717	14.0729	13.5004	1.63008	3.58897	3.25778	4.5114	1.91592	2.23066	3.18341	2.2332
YCR042C	TAF2	13.9368	15.6573	16.265	11.1837	14.8305	17.8276	12.3444	12.3493	0.942383	1.09995	1.28038	1.25715	1.55403	1.25277	1.55829	1.36394
YCR043C	YCR043C	64.7524	62.5425	66.5094	68.0044	66.6703	79.8783	74.2645	60.8896	3.46364	5.06122	3.89282	5.42419	5.83331	6.20363	4.73793	4.13985
YCR044C	PER1	34.8319	33.497	37.6111	28.7555	34.5064	32.0751	31.9066	31.1432	1.16136	1.21135	1.529	0.957996	1.06235	0.957186	1.07931	1.1284
YCR045C	RRT12	20.9677	25.4949	25.4165	16.6585	23.1492	25.3271	18.0451	20.0164	0.621128	0.522229	0.588463	0.446941	0.455532	0.524426	0.386915	0.52833
YCR045W-A	YCR045W-A	0.0010442	0	0	1.58818	0	0.3887	0	0.000248686	0	6.42639e-06	0	0.0575858	0	0	0	0
YCR046C	IMG1	80.7234	96.7772	94.1693	80.7509	94.8284	106.347	76.2984	75.7567	24.3472	31.0552	24.7029	30.7203	40.8004	38.4402	35.817	40.3423
YCR047C	BUD23	45.7565	43.614	44.9581	60.1732	51.4362	63.283	58.9369	59.8021	31.2197	58.1907	32.3046	60.0153	48.227	58.2924	42.961	52.1359
YCR047W-A	YCR047W-A	0	0	0	0	0	0	0	0	0	0	0	0	0	0	0	0
YCR048W	ARE1	13.9876	15.7415	17.5541	11.3746	15.7595	17.9463	12.2898	12.0321	3.28943	4.89598	3.42531	5.06474	5.81492	5.30399	6.22423	6.41867
YCR049C	YCR049C	6.89212	5.67569	6.56511	5.26014	7.00096	7.44442	5.17838	4.27088	1.23664	1.48052	1.96571	2.48276	3.30063	2.77063	3.22239	3.235
YCR050C	YCR050C	44.5109	49.4258	53.3149	37.6427	46.5432	58.15	41.441	41.1066	8.41374	13.8763	9.05463	12.8813	16.3213	16.8772	14.2463	17.1777
YCR051W	YCR051W	74.0014	84.6022	88.4885	96.5425	93.077	103.975	93.8804	90.5557	8.48105	15.1252	9.82671	14.09	13.92	17.7546	14.3134	16.8575
YCR052W	RSC6	18.41	17.2348	20.9712	20.416	18.2359	22.4929	18.1702	16.4429	1.19287	1.37528	1.67848	1.41662	2.0335	1.4756	1.56341	1.54132
YCR053W	THR4	66.3928	56.7423	65.2951	85.1636	65.1495	73.7187	73.0963	66.3843	2.47608	2.62606	3.22179	2.66592	3.69132	1.90917	4.17784	2.0185
YCR054C	CTR86	4.42168	4.41325	4.77977	4.03274	4.63489	4.91542	4.00654	3.7108	0.288393	0.251591	0.257133	0.295908	0.310616	0.278467	0.365353	0.329631
YCR057C	PWP2	7.06137	8.51679	8.79874	11.372	8.95017	14.6761	9.8151	9.01852	1.01779	0.904063	1.01591	0.922719	1.7593	0.819919	1.58175	0.800901
YCR059C	YIH1	27.0068	25.5935	27.511	32.0827	27.0342	34.3258	27.2654	27.4163	9.75447	15.3804	10.6127	14.5067	16.8584	16.815	14.963	17.0062
YCR060W	TAH1	42.6438	50.2014	48.1259	48.8104	46.3611	53.5503	46.9044	41.9206	13.064	16.8359	14.9085	19.1262	19.5546	21.3823	18.225	21.0667
YCR061W	YCR061W	26.0336	31.4665	33.8793	22.0912	29.0885	27.5891	24.7758	22.4364	8.14676	10.8484	9.25767	14.0883	13.0522	14.8804	13.5351	17.4101
YCR063W	BUD31	0.893129	1.3562	2.07406	2.59363	1.52306	2.35358	1.42188	1.39299	1.3327	2.13985	1.92935	2.03492	1.98157	1.2553	2.51794	0.817733
YCR064C	YCR064C	3.41961	4.84827	4.49968	2.47571	5.02224	4.30469	2.57472	3.79104	0.559625	0.737666	0.950477	0.696924	0.633419	0.385791	0.613678	0.530633
YCR065W	HCM1	5.02339	4.99543	7.84492	4.95674	5.2796	6.65892	5.33148	4.4761	1.6659	1.51751	1.62226	1.32898	2.0782	1.26132	1.96683	1.15144
YCR066W	RAD18	6.34446	6.70976	8.12741	5.58587	8.14744	6.63108	6.8792	6.27343	0.267195	0.269949	0.205169	0.223575	0.365085	0.201639	0.325411	0.266619
YCR067C	SED4	22.953	28.5369	31.398	17.2057	27.7466	34.4846	19.1281	19.7736	1.70543	2.27017	1.97256	2.18791	1.90667	1.79604	1.82195	1.50158
YCR068W	ATG15	24.6107	23.2123	26.533	17.1648	24.0127	19.3577	18.6144	19.6162	64.4447	77.5544	71.0585	80.0685	65.8905	64.1293	63.928	67.0656
YCR069W	CPR4	84.5069	98.0445	110.38	70.3575	95.4969	109.407	72.6197	76.8714	97.2513	137.306	112.022	137.262	110.091	106.524	102.965	109.933
YCR071C	IMG2	79.7545	89.474	96.4041	63.296	86.5514	99.4563	69.0907	69.987	42.7785	68.9877	48.3053	74.1025	50.4236	60.6994	50.1344	54.0644
YCR072C	RSA4	8.02575	7.20738	7.7713	12.4942	7.99483	8.4908	10.8543	10.3733	0.743138	0.869434	0.993845	0.490026	0.965284	0.366801	0.806858	0.477923
YCR073C	SSK22	5.638	5.51409	5.54641	5.1767	4.82971	9.44451	5.17892	4.9351	0.782806	1.65857	1.13723	1.59748	1.24784	1.39557	1.06299	1.47802
YCR073W-A	SOL2	85.7677	98.5201	99.8352	73.3913	90.3885	94.6604	69.6383	80.2228	38.3522	44.4046	39.6428	45.8122	47.4384	48.0644	47.8186	52.2243
YCR075C	ERS1	26.8034	28.5152	29.9685	22.5439	27.2169	24.2632	21.979	23.1163	0.952934	0.88964	1.41032	0.78219	1.05054	0.773776	1.15034	0.589499
YCR075W-A	YCR075W-A	61.6536	54.814	75.5864	54.989	64.0229	63.8367	54.9293	57.1196	7.35217	8.76771	6.68112	8.56472	9.51095	7.39556	8.12843	8.31507
YCR076C	FUB1	28.1641	27.1728	27.5264	22.29	24.942	23.9014	22.2105	21.6125	10.815	10.878	11.6216	10.9045	13.0693	11.8987	11.9476	12.8841
YCR077C	PAT1	42.2789	42.0585	51.4849	30.4462	44.0384	39.5368	36.6667	33.6935	3.69654	6.4568	4.19332	7.67255	9.66978	7.2976	9.29356	8.31177
YCR079W	PTC6	23.9935	30.2289	33.5097	18.0495	28.878	28.231	22.5469	19.9114	7.45664	9.37979	7.7022	9.96493	13.7907	13.1317	14.3243	14.3724
YCR081C-A	YCR081C-A	1.23868	7.28345	4.71541	4.00767	8.11834	3.4396	0.77285	2.89356	1.19641	0.380247	0.23078	0.0278664	0	0.481598	0.432106	0.111787
YCR081W	SRB8	4.96251	5.31545	6.21256	3.85334	5.06415	5.9555	4.5788	4.28847	0.132328	0.149587	0.232982	0.14442	0.273087	0.258759	0.302114	0.2451
YCR082W	AHC2	116.759	135.075	131.941	109.162	123.055	155.38	98.9802	104.323	73.5344	122.163	85.7229	121.349	119.459	110.66	105.455	106.036
YCR083W	TRX3	80.3728	123.866	141.193	59.7387	113.055	142.503	75.063	79.0787	71.0957	116.483	83.3447	125.263	164.751	163.564	151.996	154.918
YCR084C	TUP1	53.1071	48.3752	59.502	45.9673	51.7579	52.1481	44.7588	43.3528	10.7883	13.6673	12.1174	11.4549	12.54	8.74943	12.7647	8.56767
YCR085W	YCR085W	2.60934	1.50491	2.44623	2.26194	2.09274	1.34101	2.41133	2.69124	1.11551	2.12793	0.732366	0.911752	0.993277	0.609062	1.05152	0.834453
YCR086W	CSM1	11.6749	9.08324	12.2312	13.4499	10.6761	9.78069	14.2415	10.4636	7.16684	13.4417	8.90622	13.2456	9.70958	10.824	9.50424	10.5389
YCR087C-A	YCR087C-A	0	0	0	0	0	0	0	0	0	0	0	0	0	0	0	0
YCR087W	YCR087W	26.3241	26.3926	25.89	49.2771	30.3526	39.0892	42.9615	37.9042	2.75255	4.91503	3.77262	3.1574	3.29314	2.60686	2.31487	1.81875
YCR088W	ABP1	73.619	102.662	121.448	57.9917	99.3703	132.361	66.1583	64.341	8.74671	7.48309	8.71358	7.14932	8.20701	7.60757	7.63559	6.79103
YCR089W	FIG2	6.88124	7.01956	7.57307	4.64419	7.08551	5.71442	5.92967	5.04671	0.625625	0.749224	0.744641	0.723494	1.18683	1.2504	1.01053	1.0991
YCR090C	YCR090C	46.8961	54.6438	58.8111	47.7005	51.1657	66.294	47.0059	46.2188	1.71193	1.73015	1.68736	1.67478	1.96216	1.64465	1.85198	1.82652
YCR091W	KIN82	35.1051	48.7288	49.6618	20.9947	41.8684	39.0263	28.9965	28.4055	8.63191	9.86059	9.40805	11.2538	30.6909	22.685	29.4146	22.7188
YCR092C	MSH3	5.15592	5.83161	5.80477	4.48258	5.11309	6.27695	4.61549	4.83678	0.511708	0.560709	0.629852	0.496869	0.935798	0.496347	0.765495	0.488421
YCR093W	CDC39	15.3744	16.3515	19.1175	12.0759	16.6441	16.9213	13.7523	12.8748	2.24022	3.97643	2.92741	4.36645	4.48991	4.0333	4.01959	4.12833
YCR094W	CDC50	19.9183	22.8159	26.1157	20.0331	22.565	28.2036	19.7784	18.5564	1.44023	2.49255	2.02681	2.40899	2.60535	2.70919	2.24168	2.77609
YCR095C	OCA4	17.881	19.8951	18.9848	17.0886	18.707	18.1469	17.552	16.8476	8.82143	15.5287	10.0122	14.2243	12.4845	10.9072	9.75723	9.83576
YCR095W-A	YCR095W-A	49.2377	57.0155	51.1026	38.3727	42.991	47.9498	47.174	41.7835	38.1004	60.2852	39.4199	70.258	56.4911	71.8484	47.5481	61.135
YCR096C	HMRA2	50.4984	80.9335	66.3962	46.6001	69.4206	82.9392	51.6854	52.4203	72.3845	109.068	85.2674	121.193	73.899	76.9356	73.2745	78.9341
YCR097W	HMRA1	41.2259	45.1241	53.4384	28.4545	35.795	50.5953	38.1442	44.2603	21.9186	42.6724	31.2276	52.3094	47.7514	43.5418	41.036	48.2008
YCR097W-A	YCR097W-A	0	0	0	0	0	0	0	0	0	0	0	0	0	0	0	0
YCR098C	GIT1	2.01434	3.60246	3.50311	1.60362	2.39009	4.69972	1.2372	1.92035	0.862975	0.575882	0.624687	0.463677	0.441667	0.458458	0.327942	0.35046
YCR099C	YCR099C	8.43295	13.8853	15.0497	6.99452	11.4626	14.4724	9.54055	8.69538	7.34786	2.07426	6.41235	2.37906	2.99883	4.39668	4.07244	4.26979
YCR100C	YCR100C	5.24852	8.74596	11.5013	4.68958	6.69811	7.98796	6.31053	5.63667	2.90877	1.29419	3.05564	1.62039	2.61301	2.48912	2.88441	3.15596
YCR101C	YCR101C	6.57374	8.73869	11.0831	4.11492	8.59321	6.76469	8.57232	7.46526	1.57218	0.951583	1.68736	0.921129	2.00779	1.64465	2.33703	1.99256
YCR102C	YCR102C	11.4511	10.4317	11.6511	13.9441	10.7935	11.9002	12.8571	13.0289	1.06559	0.992042	1.15129	1.32765	2.47055	2.29259	2.22286	2.00966
YCR102W-A	YCR102W-A	4.43106	5.45962	9.79577	2.56098	7.85305	7.60499	3.82376	4.13105	0	0.759208	0.447903	0.24841	1.61095	0.533578	0.266008	1.03953
YCR104W	PAU3	0.934011	1.55161	1.22739	0.755793	1.70974	0.93207	0.900583	0.831684	0.150977	0.203181	0.143687	0.192122	0	0.0853166	0	0.0937012
YCR105W	ADH7	9.70243	13.2993	14.3184	7.72964	11.7233	14.4217	9.51268	10.7041	1.75554	2.98903	1.95106	2.66151	4.78508	4.75864	4.07724	4.47146
YCR106W	RDS1	8.58149	9.03124	10.8684	8.5195	8.7784	11.0336	8.83757	7.93283	1.55409	4.48988	2.03556	4.98687	5.99279	6.37822	5.41646	6.41211
YCR107W	AAD3	6.45767	9.4564	9.50104	6.52598	7.57158	12.2071	6.87325	6.80544	1.44769	1.91454	1.48534	2.00584	3.15454	3.35386	3.3276	3.14311
YCR108C	YCR108C	4.0809	5.02854	7.18152	4.02749	7.2413	3.61376	4.90589	3.91157	4.67269	7.92245	2.9801	7.47956	3.50249	3.4228	4.10263	3.65747
YDL001W	RMD1	19.146	15.2432	15.4412	16.6656	15.7336	12.4799	16.8141	15.8576	15.9706	23.0418	19.3179	22.9533	12.4087	13.7283	11.7086	12.4455
YDL002C	NHP10	68.1165	81.6529	73.8739	60.4655	72.3985	69.3915	62.4516	68.8363	22.6776	27.0864	27.5894	26.7884	14.2389	16.4642	17.0497	17.4735
YDL003W	MCD1	6.84039	5.23	6.15658	8.07193	5.55199	4.77935	6.5966	5.40052	0.330139	0.304493	0.301271	0.357214	0.26305	0.202296	0.264153	0.245768
YDL004W	ATP16	287.746	419.323	461.494	224.801	363.348	449.51	288.967	275.548	99.6359	86.7185	116.818	105.865	109.651	104.136	111.551	118.82
YDL005C	MED2	52.7993	62.7564	58.5285	39.3863	54.9985	53.346	42.7325	49.6885	25.8582	48.6036	32.5286	51.8469	60.3576	56.027	53.9619	55.876
YDL006W	PTC1	38.1246	45.1183	45.3327	30.0633	41.3739	46.7923	36.7175	35.8007	16.1482	28.5374	17.2507	27.5005	32.1621	33.4687	31.1874	35.3157
YDL007C-A	YDL007C-A	0.375038	0.573066	0.46177	0.57271	0.232677	0	0.205517	0.202472	0.124951	0.900536	0.392513	0.731094	0.159808	0.31278	0.776615	0.60311
YDL007W	RPT2	124.537	138.592	136.414	110.687	130.684	151.933	102.319	114.784	70.3707	110.653	89.4961	119.004	65.9244	77.3311	66.5086	76.2611
YDL008W	APC11	27.299	32.8686	31.5869	28.0344	28.5085	32.9661	28.2409	25.5777	63.9327	71.7297	79.8472	74.0401	27.1147	39.9944	29.8811	40.8016
YDL009C	YDL009C	91.1253	120.163	116.975	61.2796	101.598	141.531	70.9181	81.1229	99.6885	114.815	108.542	128.786	85.5872	92.8338	77.0564	87.7349
YDL010W	GRX6	35.644	37.1465	38.3246	26.5628	37.097	37.2758	29.037	27.2475	62.4722	52.2151	63.2291	56.8102	49.1636	43.4385	48.6102	42.2427
YDL011C	YDL011C	14.8798	11.35	14.5017	7.70592	13.9863	11.0884	10.4498	10.044	7.059	9.05858	9.02661	8.18087	11.2036	10.3942	8.60305	9.51058
YDL012C	YDL012C	71.4969	50.2622	57.3889	76.9875	59.2325	46.1438	62.9363	56.8411	113.141	145.403	127.46	130.692	98.7118	83.6396	98.3874	73.6237
YDL013W	SLX5	25.1563	29.9675	28.4824	19.2582	26.4921	25.7885	19.2082	23.3983	53.2345	80.6831	63.3036	80.9627	63.7335	64.4758	62.3722	64.0112
YDL014W	NOP1	48.8037	36.0163	41.9923	89.1877	43.3052	66.5292	77.3216	59.476	10.2504	11.0373	11.9514	9.94165	10.7817	6.88244	11.6504	7.17385
YDL015C	TSC13	137.493	141.534	158.357	118.139	141.068	142.133	116.985	124.833	3.63882	3.77783	4.38947	3.92533	3.45127	2.37681	3.17243	3.27178
YDL016C	YDL016C	55.3229	66.6868	70.8915	41.4624	59.3662	73.2667	53.6121	57.9001	2.6343	3.99874	3.11904	5.66808	3.44295	2.65961	3.48777	2.23167
YDL017W	CDC7	11.7705	8.45274	8.6289	8.49254	9.4445	6.19959	9.87708	9.57812	2.4102	4.17966	2.598	4.0827	5.00156	3.76849	4.22677	3.92397
YDL018C	ERP3	31.6409	33.677	36.7227	27.0271	31.9961	29.5715	31.7834	27.646	3.47358	8.92321	3.92172	8.35011	9.53924	12.2807	10.5297	12.1014
YDL019C	OSH2	69.1347	87.3308	81.1348	56.9364	75.1562	85.8163	57.9404	63.3517	21.069	28.9197	24.4352	29.9692	45.456	38.5187	46.7472	39.5537
YDL020C	RPN4	138.11	95.3108	86.9236	166.857	95.0882	69.9859	115.28	134.564	328.105	411.362	382.768	446.036	415.548	357.191	385.242	376.002
YDL021W	GPM2	74.0807	62.352	59.743	54.2856	58.9904	45.0435	56.8156	61.4728	17.3079	15.7232	18.8739	17.794	11.4064	13.0743	12.4428	13.6301
YDL022C-A	YDL022C-A	2.40918	3.27183	1.48543	1.63387	3.23862	0.923142	0.661203	3.90515	10.8463	11.2396	10.9362	11.885	28.543	21.4759	19.3968	19.7197
YDL022W	GPD1	1833.29	1060.79	1080.85	1765.54	1185.84	689.254	1468.67	1514.42	176.791	186.234	203.441	191.841	237.62	194.355	243.543	229.605
YDL023C	YDL023C	783.129	343.805	348.731	754.943	396.094	174.202	640.065	651.165	86.7327	53.2345	87.0602	59.309	99.2159	83.3916	111.703	95.8636
YDL024C	DIA3	6.19888	4.93304	4.30026	3.76212	4.19076	3.48691	2.84508	5.0845	9.28759	11.8705	10.5156	12.4186	23.0791	18.8278	20.6056	18.9416
YDL025C	RTK1	58.6738	54.6757	55.1938	50.7856	52.1395	40.1522	50.2723	50.5379	81.773	121.677	94.3043	133.648	106.269	103.28	104.991	111.351
YDL025W-A	YDL025W-A	0	0	0	0	0	0	0	0	0	0	0	0	0	0	0	0
YDL026W	YDL026W	22.9679	20.2687	21.5666	11.9465	19.9424	15.6113	13.9274	16.474	12.9981	17.0035	15.8614	16.7405	16.9575	17.1944	18.639	16.0397
YDL027C	YDL027C	43.6514	46.7188	50.4143	23.6041	42.4514	41.3835	31.8207	33.4155	11.8109	21.0913	13.6717	21.9316	21.3579	20.3096	19.3984	20.4948
YDL028C	MPS1	15.5793	15.5747	17.506	14.5335	15.8507	14.4103	13.9472	13.363	4.62103	8.71676	5.79733	9.02604	8.538	7.12185	8.48272	8.14191
YDL029W	ARP2	116.438	138.788	164.534	88.0926	139.923	164.89	98.3643	100.225	6.6462	10.3829	7.24655	10.8165	11.8109	13.043	11.7772	13.0695
YDL030W	PRP9	9.1205	8.95107	10.3618	8.97333	9.86167	8.86551	9.4968	9.15669	1.20568	2.1637	1.45353	2.5086	3.50584	3.50591	3.37427	3.09626
YDL031W	DBP10	12.6394	12.4503	12.4083	21.3087	12.954	17.7588	18.121	16.8208	2.78644	4.71364	3.56879	4.48383	5.63369	3.92366	4.79508	3.27477
YDL032W	YDL032W	4.14753	3.51451	5.36626	2.20921	5.23741	4.9238	3.65448	2.73712	3.28312	5.45776	4.59272	4.65946	4.41055	4.63046	3.22814	4.68262
YDL033C	SLM3	13.6243	16.5052	18.5579	10.4756	16.2747	18.9928	11.9333	10.7663	9.65639	17.4956	12.2909	17.8619	12.9142	13.4652	12.0891	13.0292
YDL034W	YDL034W	20.8469	16.5863	24.8733	14.8601	21.0806	13.2194	17.921	17.6177	14.2318	17.5133	14.5527	19.1122	17.5995	16.3612	21.1225	15.3388
YDL035C	GPR1	23.0074	26.5018	26.6145	16.7523	23.6748	26.7571	19.9211	17.9078	8.9417	16.6915	10.7779	17.156	17.931	15.8132	15.5673	16.3051
YDL036C	PUS9	10.4476	11.3891	12.9132	11.4359	12.124	14.2493	12.4714	9.90321	1.2217	1.62324	1.68483	1.7267	2.20981	1.88658	2.03078	1.72404
YDL037C	BSC1	0.714695	0.902115	1.00742	1.56161	0.853779	0.917054	0.468771	0.851498	0.390302	0.42609	0.632115	0.294221	0.66206	0.359846	0.493951	0.384271
YDL039C	PRM7	2.49383	2.17871	1.75522	4.59708	1.75949	3.7865	2.10715	3.15739	0.483301	0.458388	0.6385	0.551403	0.627498	0.490405	0.594929	0.36601
YDL040C	NAT1	37.8974	41.3039	47.0644	37.5874	42.6622	48.123	36.64	35.1064	1.27793	0.898381	1.1737	0.840815	1.17147	0.979295	1.21827	0.772045
YDL041W	YDL041W	3.7583	1.90276	1.81916	2.08194	1.49914	1.37751	2.92905	2.5761	1.02802	2.26018	1.35868	2.71554	3.85066	3.5539	4.50403	4.15168
YDL042C	SIR2	7.5074	8.4435	10.3879	10.4227	8.85384	7.80762	10.3637	9.06846	5.01091	5.24387	4.86248	5.58289	9.55992	9.13415	8.9588	8.23898
YDL043C	PRP11	11.9953	11.0615	12.8267	11.212	10.8924	12.5285	13.4961	11.3684	2.2725	2.20072	2.7184	2.05229	3.36609	2.28066	2.95396	1.94194
YDL044C	MTF2	13.8617	13.7102	15.0175	13.036	12.4283	15.4897	11.8293	11.8012	1.51061	2.09037	1.63568	2.18719	2.82095	2.33445	2.30728	2.17662
YDL045C	FAD1	41.9359	53.0471	54.9434	34.9301	51.5764	54.2924	39.6159	39.1496	10.5067	17.7985	11.6873	19.3191	23.613	20.7774	20.9039	22.0778
YDL045W-A	MRP10	185.193	190.356	215.133	153.582	196.598	176.911	148.773	168.378	96.6856	152.37	103.489	141.215	76.2838	81.6906	75.6761	83.8447
YDL046W	NPC2	501.048	591.333	597.217	374.965	550.475	478.459	402.887	444.45	611.847	838.686	674.301	891.972	1004.53	947.59	978.775	1028.58
YDL047W	SIT4	101.206	94.4233	93.945	102.42	93.4285	76.8552	89.3094	92.7305	109.224	134.977	114.063	135.306	120.371	112.806	115.233	116.584
YDL048C	STP4	54.4845	59.8923	63.8642	79.1167	56.9062	58.009	61.4824	54.1311	14.5637	12.7282	13.169	12.1628	14.9327	13.7792	14.7236	14.4904
YDL049C	KNH1	13.2286	13.3995	16.4333	11.3004	14.934	14.1001	13.4342	13.9369	1.62584	1.58327	2.07987	1.68175	2.67868	1.61728	2.34631	2.34283
YDL050C	YDL050C	49.8166	45.0062	47.5923	63.0211	49.0479	66.01	58.3462	58.2461	12.7447	39.2558	15.3448	34.2277	20.9591	25.7181	20.3387	23.4681
YDL051W	LHP1	30.1779	25.808	26.2958	42.7154	29.0989	32.416	36.0583	38.0876	14.0281	23.4597	16.2376	23.8462	15.8764	18.0171	17.7806	17.9199
YDL052C	SLC1	59.9587	63.0707	64.8485	56.7864	63.9842	64.6321	51.4408	57.7226	6.10462	7.78964	5.50998	7.40191	3.94759	4.58048	4.64349	4.52852
YDL053C	PBP4	132.189	146.446	151.83	116.959	143.739	145.646	117.735	126.461	171.124	277.134	206.381	312.934	228.636	259.564	218.354	278.03
YDL054C	MCH1	19.2582	18.5423	20.5812	15.9032	18.1861	14.4733	17.8457	16.1065	40.955	79.4454	53.7382	96.3097	60.8527	76.915	64.5023	87.6909
YDL055C	PSA1	506.14	351.013	349.136	617.023	372.944	339.499	459.207	465.695	29.8007	15.7966	28.7476	18.5255	9.26513	8.9826	10.0829	9.5768
YDL056W	MBP1	14.4916	15.2815	15.4013	11.1592	14.7116	15.6788	12.3512	11.4843	0.530678	0.586441	0.635671	0.476633	0.797011	0.649573	0.672572	0.759323
YDL057W	YDL057W	11.5781	12.2788	10.5779	7.68213	11.1296	12.8961	9.45354	10.4935	2.86221	2.47538	2.78472	2.17723	4.22864	5.31772	3.4165	5.32215
YDL058W	USO1	11.1834	13.2709	13.3976	10.1852	12.2466	18.2754	10.8101	9.51503	1.39194	1.87536	1.60556	1.93495	1.7381	1.67347	1.55075	1.6767
YDL059C	RAD59	18.3949	16.5001	17.5552	9.02003	18.7054	28.3289	13.7637	10.3274	24.2616	54.4507	25.0975	52.3488	31.7486	41.2321	35.0878	44.0799
YDL060W	TSR1	6.21558	4.7356	4.85958	10.4564	5.74222	8.03208	9.13972	7.60046	1.13863	1.57106	1.52123	1.45152	1.59594	1.08993	1.88052	1.14128
YDL061C	RPS29B	1017.93	903.225	1115.61	1246.68	1077.31	1386.08	1344.36	1085.08	116.334	147.188	140.282	148.552	67.7243	70.3635	60.3816	59.8753
YDL062W	YDL062W	1.4073	1.12451	0.964402	2.72696	0.380509	1.24685	2.17001	1.43663	1.76519	1.09049	1.91879	2.12285	1.73948	1.13415	1.38183	1.53136
YDL063C	SYO1	4.41561	4.50957	4.67839	7.49084	5.18365	7.53926	7.28917	5.78409	1.79615	2.97834	2.74432	3.11088	2.26505	1.71564	2.26578	1.51823
YDL064W	UBC9	60.0657	59.4973	67.6464	58.4537	64.9198	66.9553	61.1485	55.3933	23.2648	49.547	28.5256	52.3841	35.8628	40.3619	33.5943	41.8187
YDL065C	PEX19	36.4209	36.1088	35.9532	30.4747	33.2375	33.777	32.3322	31.6085	60.2062	84.2546	71.9605	89.8062	51.4097	55.053	52.3552	54.3949
YDL066W	IDP1	71.0333	98.8981	101.114	69.8584	88.7728	120.537	70.6974	68.9376	45.2528	45.6153	51.2861	48.4234	34.8737	36.3387	36.8815	37.9025
YDL067C	COX9	781.807	1072.88	1234.3	589.769	954.833	1105.23	823.857	777.812	1088.81	1185.42	1242.06	1383.41	1475.91	1473.88	1454.5	1562.43
YDL068W	YDL068W	5.12791	3.70985	6.19969	4.42903	5.10191	5.91581	3.53101	3.73914	4.95049	7.4511	7.16516	6.99548	2.96087	4.0751	4.7049	2.94761
YDL069C	CBS1	11.1867	13.2401	11.3099	6.98043	8.87844	10.7383	9.78941	10.224	3.9608	7.11434	5.87961	7.64504	3.80677	4.42796	3.94996	3.04838
YDL070W	BDF2	92.5924	90.8384	82.3229	69.4041	74.302	111.395	69.3239	77.507	110.835	142.44	126.779	154.553	145.585	124.727	128.788	123.131
YDL071C	YDL071C	7.56472	7.11818	5.82741	6.74188	6.64068	7.08782	5.19726	6.5884	10.6853	12.615	17.5962	14.8167	8.93704	10.5586	8.50756	10.7334
YDL072C	YET3	413.175	470.43	429.567	349.176	439.908	444.127	325.516	423.85	53.8144	108.085	69.5719	113.131	73.195	91.8878	72.556	91.0686
YDL073W	YDL073W	12.4837	13.517	14.0815	10.7805	13.0269	15.8535	11.2536	11.2867	1.12777	2.27083	1.51172	2.27421	1.49278	1.26298	1.43556	1.27143
YDL074C	BRE1	25.442	25.1735	26.2214	25.1522	24.6468	27.0788	22.4391	23.4176	5.40307	11.9847	7.73228	12.5431	8.25916	8.16766	8.12876	7.23258
YDL075W	RPL31A	1073.61	896.795	1076.85	1410.97	1071.86	1233.41	1469.85	1123.87	17.5562	21.3841	20.8977	21.885	8.04314	8.32077	7.53672	7.5418
YDL076C	RXT3	55.9477	56.0007	55.4851	54.0922	53.8211	50.1089	47.8634	51.2508	23.5362	37.486	28.9965	38.6406	30.5447	28.5714	31.4693	30.8798
YDL077C	VAM6	13.2499	12.5021	13.2564	11.2718	12.2501	12.005	11.6133	10.8031	1.30413	3.10272	1.84941	2.7802	3.13208	3.21835	3.05712	2.87055
YDL078C	MDH3	162.755	196.328	209.406	118.085	186.708	189.516	138.15	137.23	223.725	196.576	239.182	216.673	257.051	215.805	244.577	231.46
YDL079C	MRK1	176.014	207.489	190.523	105.034	173.762	157.997	143.001	145.754	101.831	116.335	105.944	126.808	209.171	148.489	187.398	147.399
YDL080C	THI3	19.2942	22.5517	22.0106	17.608	20.3181	24.4027	16.9818	18.5532	1.99537	3.09033	2.3663	2.64621	2.72228	2.24833	2.86314	2.43642
YDL081C	RPP1A	4428.06	5439.47	5278.17	4420.52	5658.22	5622.81	4791.79	5161.82	46.8484	61.3047	54.169	52.8235	39.8017	33.0632	34.0881	34.1112
YDL082W	RPL13A	260.208	198.495	242.85	360.292	248.635	285.893	340.378	262.879	6.39202	4.39591	7.18583	4.62397	1.57189	1.06749	1.4795	1.90226
YDL083C	RPS16B	496.189	399.677	500.894	684.805	477.118	568.668	677.357	532.331	13.7466	11.7523	16.582	12.5911	4.43752	5.17622	5.68176	6.64028
YDL084W	SUB2	219.902	215.643	223.877	232.577	213.165	247.518	203.145	202.617	15.794	24.9853	19.6372	24.1989	19.9973	17.524	19.2539	17.0644
YDL085C-A	YDL085C-A	230.443	202.797	214.977	208.152	221.866	241.686	191.96	195.127	55.0513	117.655	64.0245	105.317	88.5965	102.205	88.0578	106.385
YDL085W	NDE2	26.1624	36.1579	31.3985	15.2505	27.9316	20.8787	15.364	22.3294	149.747	262.09	182.071	309.166	358.272	366.471	353.37	400.442
YDL086C-A	YDL086C-A	0	0	0	0	0	0	0	0	0	0	0	0	0	0	0	0
YDL086W	YDL086W	199.173	206.011	190.302	218.17	191.096	159.011	173.584	203.93	71.2808	89.8682	81.1169	102.286	106.094	126.792	113.833	149.419
YDL087C	LUC7	21.6666	18.0759	19.6321	16.8926	20.0507	12.2247	15.9436	17.4931	35.6478	53.4704	43.7796	59.5492	40.6039	44.314	42.7652	47.6946
YDL088C	ASM4	43.7291	35.9992	38.7914	35.333	37.5907	30.9618	35.5031	37.0701	23.3051	46.4511	29.4696	46.8658	39.2333	38.6596	35.2762	38.2422
YDL089W	NUR1	18.4121	17.7046	19.21	12.3396	16.2149	14.5042	14.977	15.9766	3.52887	4.5952	4.26255	4.70277	5.32382	5.44441	5.21671	5.28436
YDL090C	RAM1	13.8855	16.7847	18.2566	11.7757	16.0458	18.6076	14.2442	13.354	2.50317	2.99621	2.95263	3.0666	3.26089	2.73833	3.19974	3.58019
YDL091C	UBX3	36.8384	38.065	40.813	27.9644	34.8661	29.8773	30.9236	31.2726	6.20429	7.2167	7.37034	8.01961	9.25616	9.1222	8.98193	8.78469
YDL092W	SRP14	110.296	118.349	123.719	103.213	114.219	136.017	111.022	105.636	20.9765	47.1675	26.6494	48.7258	33.4261	35.4181	32.3428	35.3097
YDL093W	PMT5	11.831	11.902	14.6502	7.78427	11.8672	11.209	9.14633	8.40613	1.85548	2.22623	2.24862	2.25547	1.85914	1.66195	1.61891	1.6879
YDL094C	YDL094C	8.35899	9.23191	9.53034	4.99627	9.01548	7.38813	5.76411	7.42052	0.484167	1.04015	0.628979	0.846335	0.420788	0.320583	0.835121	0.505276
YDL095W	PMT1	83.1705	88.1796	83.2082	82.3715	86.299	95.0575	66.7556	74.2716	25.1353	31.4205	27.381	30.7071	23.9584	22.5734	22.6868	21.7446
YDL096C	OPI6	22.1794	22.225	26.0475	16.4274	20.9349	24.2142	16.5541	20.8145	9.83454	9.52631	9.59202	11.1117	8.90583	9.49453	10.4078	9.20249
YDL097C	RPN6	170.893	225.186	212.48	140.135	199.983	226.068	133.659	155.284	53.31	86.2498	72.8748	98.7302	50.4841	63.5873	50.3907	68.0083
YDL098C	SNU23	25.8795	22.8694	25.218	23.9984	23.3172	24.1737	21.7442	22.1101	4.02366	8.15298	4.69409	8.61788	6.3445	6.59747	5.96773	6.02677
YDL099W	BUG1	87.055	103.157	88.1348	82.608	93.513	98.2926	81.3652	88.9285	11.6425	20.4975	14.0738	20.5632	13.8045	16.7686	12.8692	16.0989
YDL100C	GET3	151.235	149.998	148.231	159.984	149.072	154.368	123.531	153.194	9.93353	16.3494	13.8054	18.5449	11.705	13.5724	11.3146	13.5896
YDL101C	DUN1	11.4127	7.82098	8.36918	8.79614	8.93811	6.28908	9.92924	8.44789	0.542824	0.533631	0.55002	0.539031	0.510256	0.522903	0.491137	0.457158
YDL102W	POL3	4.9932	4.80576	5.96687	4.83533	5.28406	5.26767	4.81854	4.47485	0.426046	0.512933	0.577628	0.490214	1.03344	0.818275	0.982927	0.601789
YDL103C	QRI1	32.8014	34.7983	37.6442	32.371	35.3738	38.8925	32.7191	29.8972	1.04151	0.960533	1.12752	1.22055	1.48099	0.954775	1.53231	0.843687
YDL104C	QRI7	9.36466	9.44135	10.8551	8.90676	10.0244	9.62636	8.35772	8.35732	1.05945	0.835314	1.09988	0.792041	0.878878	0.572814	0.511034	0.461413
YDL105W	NSE4	5.51713	3.68521	4.19071	5.6866	4.79671	3.22491	5.06719	4.55377	1.47134	2.86158	1.72063	2.47201	2.62401	2.4815	2.57573	2.71793
YDL106C	PHO2	38.0576	31.9112	34.477	27.6349	34.5838	28.3597	30.1209	31.7407	10.0594	21.5543	13.153	23.9239	20.8368	20.8355	18.803	21.2954
YDL107W	MSS2	17.1686	19.0643	18.984	13.6588	17.9407	20.1951	13.3652	15.1543	1.81486	4.43745	2.63148	5.06756	4.67011	4.75454	4.42355	4.3221
YDL108W	KIN28	24.093	22.7345	22.3127	21.8621	21.8246	20.9752	22.9982	22.1257	4.68735	10.388	5.3141	9.76619	10.3321	8.96364	9.35528	9.76356
YDL109C	YDL109C	9.72422	8.27721	9.68403	9.09226	9.07797	7.32586	8.31233	8.28163	3.17962	5.16535	3.40442	4.91728	5.68845	5.16248	5.38759	5.43408
YDL110C	TMA17	1078.32	896.89	861.206	820.425	854.703	583.446	826.54	877.925	480.819	817.652	548.273	864.029	893.975	919.923	851.839	925.864
YDL111C	RRP42	47.7158	36.5697	34.9604	51.3493	39.0588	29.7942	40.3444	39.3778	9.95783	18.5311	14.1674	21.6382	12.1697	12.5518	12.4335	13.5337
YDL112W	TRM3	7.58149	6.50933	7.02466	8.37161	7.41929	8.03481	7.30616	7.41377	0.675068	0.883285	0.952789	0.732234	0.805449	0.59356	0.876237	0.537134
YDL113C	ATG20	56.3819	55.9124	57.0095	37.3684	52.3611	43.3702	44.1258	46.0985	22.2809	42.1483	27.3857	43.324	51.9371	47.1315	48.9141	44.7094
YDL114W	YDL114W	4.68234	4.40812	4.06238	2.7723	4.1461	3.18482	2.86931	3.43689	0.737027	1.99127	0.940132	1.41745	1.24393	1.31657	1.08802	0.78815
YDL114W-A	YDL114W-A	9.29583	12.2144	5.13757	7.918	15.1502	10.1076	6.37392	8.3088	14.5108	35.5842	15.3672	35.0737	22.2691	29.0136	17.8247	16.9534
YDL115C	IWR1	44.1134	57.2675	54.2072	36.479	50.1647	59.234	39.8709	40.5941	29.1408	55.3493	36.2023	59.8294	52.3786	56.9987	47.8429	57.5327
YDL116W	NUP84	30.4158	29.6661	31.1133	24.1364	29.7536	28.4335	25.9705	25.8207	0.965962	1.76555	1.49489	1.43321	1.63851	1.1261	1.46723	1.28592
YDL117W	CYK3	9.30026	11.3024	11.8039	8.96094	11.174	14.4988	8.83979	9.27102	0.417199	0.449213	0.444079	0.459778	0.48636	0.392766	0.399972	0.321197
YDL118W	YDL118W	8.29978	6.78296	7.46128	7.68517	7.48741	6.49568	5.49625	6.99012	0.580418	1.05358	0.792142	1.43511	1.049	0.950948	0.889525	0.801723
YDL119C	YDL119C	15.0283	18.1804	16.1294	14.851	14.7063	20.544	13.2372	14.4033	0.943843	1.77999	1.10576	2.00525	1.29193	1.42141	0.903098	1.31408
YDL120W	YFH1	72.1476	92.9784	99.4192	51.8016	89.3502	101.027	60.6042	67.9736	35.2581	55.1805	34.5115	58.2012	40.4835	45.9179	39.8813	45.9605
YDL121C	YDL121C	50.6808	42.651	45.3088	60.5421	45.9657	50.9586	60.2704	61.2323	3.05752	7.59187	4.93679	6.34445	6.1846	5.4947	5.33265	5.21197
YDL122W	UBP1	29.0351	24.6493	26.2703	31.3069	24.3919	24.8479	25.5952	26.7346	13.6716	24.8886	18.8726	24.5744	18.2775	17.8818	17.7893	17.0367
YDL123W	SNA4	145.365	133.85	123.161	124.559	132.846	115.033	123.952	131.214	347.138	442.673	413.153	472.412	441.384	400.021	420.434	430.879
YDL124W	YDL124W	408.931	416.58	412.155	325.302	387.126	348.537	306.878	348.411	297.754	440.919	404.973	527.986	430.881	480.941	454.792	549.972
YDL125C	HNT1	414.599	433.986	404.144	324.395	400.743	370.86	323.185	377.123	87.0574	163.277	101.047	165.798	126.573	153.578	128.016	165.212
YDL126C	CDC48	304.279	393.112	390.447	246.177	358.434	403.713	235.55	279.607	77.9576	116.696	94.6935	121.024	103.256	117.702	101.969	116.763
YDL127W	PCL2	14.7674	11.6288	13.8505	11.5241	13.5571	11.4406	11.5054	12.3403	2.43921	1.55363	2.32268	2.00982	2.5109	1.57557	1.57652	1.38963
YDL128W	VCX1	65.102	60.2941	61.8316	48.6104	59.0495	46.6902	52.6833	52.8241	12.2338	15.8027	13.5744	15.513	20.0535	16.3169	19.6436	17.851
YDL129W	YDL129W	28.9547	20.7314	22.1282	23.5147	21.0969	15.7439	17.1767	25.3043	4.79718	5.65043	4.34742	5.69021	7.97336	6.75978	8.63943	7.62959
YDL130W	RPP1B	890.353	927.44	1045.88	1072.27	1025.85	1362.11	1157.31	965.108	32.8329	38.8308	36.3752	38.2737	18.87	18.9204	20.301	20.6794
YDL130W-A	STF1	747.326	981.78	1019.93	494.08	831.653	915.863	571.223	658.175	908.328	1065.1	1033.67	1306.03	1082.16	1305.91	1106.07	1457.68
YDL131W	LYS21	42.0041	29.7961	31.2174	43.6624	38.1099	23.6822	42.1621	40.4631	8.44426	14.0603	9.19678	15.9759	14.1083	15.4595	13.9999	16.4602
YDL132W	CDC53	49.3715	60.4621	60.6815	40.3034	57.045	61.6657	39.2897	44.5416	5.48504	9.60473	6.82646	8.69733	8.13543	8.05143	7.50675	7.75276
YDL133C-A	RPL41B	15211.4	15912.2	16616.4	16123.9	16525.5	20053.3	14937.3	14768.2	616.893	712.418	590.292	593.137	536.684	476.861	599.609	411.877
YDL133W	SRF1	32.9507	34.6524	32.8932	27.9687	31.4347	29.8704	28.0182	29.9514	28.7875	54.353	34.0815	55.655	41.3155	41.653	39.0751	39.6388
YDL134C	PPH21	116.565	133.035	128.315	99.0672	123.879	125.134	100.703	109.249	23.9232	41.5927	27.4544	43.5738	35.5789	43.9119	37.3683	45.2363
YDL135C	RDI1	75.2377	81.2315	91.3553	60.5496	82.3011	98.6795	68.4103	70.6424	13.2582	21.013	16.6154	24.1764	15.796	20.4232	16.2497	21.1401
YDL136W	RPL35B	339.803	270.201	323.036	457.72	341.67	365.18	481.563	385.069	43.9189	52.3928	49.3503	62.715	21.2119	23.3575	22.1856	22.4402
YDL137W	ARF2	375.112	472.711	469.335	313.252	428.054	488.718	330.153	361.98	196.631	334.338	223.941	339.252	357.705	368.208	350.66	380.506
YDL138W	RGT2	7.86916	7.28684	7.59288	7.25276	6.63827	9.00117	6.25624	6.23731	5.92553	6.39553	6.3261	7.06557	4.36176	4.69065	4.29105	4.72663
YDL139C	SCM3	20.0246	16.2243	15.9965	20.4299	16.6103	14.7986	18.1755	17.2435	9.85768	16.5792	13.9586	15.595	11.5546	13.0809	8.58386	11.1817
YDL140C	RPO21	41.9554	44.9389	47.5218	36.8409	43.1969	50.5467	35.5545	35.7438	19.7999	32.6906	24.5705	32.2856	25.5188	23.9634	24.6047	25.7316
YDL141W	BPL1	15.1523	15.002	17.4184	12.0705	15.9957	16.8162	14.2034	12.8964	1.39127	1.66392	1.55023	1.34508	2.30212	1.9864	2.30336	2.17437
YDL142C	CRD1	47.2755	59.4888	59.5663	36.3445	55.9466	51.3568	43.581	45.3505	2.10304	2.45043	2.37266	2.15835	2.91227	2.32497	2.24161	1.95746
YDL143W	CCT4	55.8867	71.1602	69.6164	60.6954	63.0264	96.7578	55.9978	55.763	6.47626	8.77345	8.52132	8.96464	6.37417	5.84497	6.39657	6.51755
YDL144C	YDL144C	46.9941	63.1039	57.9346	36.1838	54.1715	59.6321	36.8265	41.6343	12.5815	20.6425	14.9379	20.1488	16.046	16.1997	15.4218	16.0245
YDL145C	COP1	50.413	51.3246	62.5166	42.6692	55.4102	58.9051	44.4933	42.7187	1.65024	1.62775	2.07236	1.66114	2.44647	1.72471	2.46033	1.49999
YDL146W	LDB17	18.5307	19.1918	21.3254	14.0809	19.4468	19.675	16.3898	15.8107	0.7535	1.24826	0.770352	0.923045	0.629706	0.699235	0.619064	0.744464
YDL147W	RPN5	126.52	173.437	175.468	98.1912	153.861	194.733	101.146	121.206	51.1689	102.046	68.9542	110.672	83.2928	89.033	76.5783	87.65
YDL148C	NOP14	5.69146	7.09538	6.25465	9.43244	6.98506	10.8572	8.34917	9.18615	2.2403	5.22465	3.0836	4.3347	3.80407	2.73522	3.22676	2.36827
YDL149W	ATG9	12.5302	15.1726	15.8621	8.18725	14.2598	16.0421	11.4342	10.7145	18.1771	38.0724	21.5208	44.2239	56.2237	50.0399	52.6937	54.826
YDL150W	RPC53	15.6314	20.4988	18.0362	23.6535	18.5308	26.3504	21.7527	21.1959	1.81624	1.9307	2.1861	2.01537	2.02475	1.35243	1.81604	1.07598
YDL151C	BUD30	2.31345	1.67708	3.20874	2.71055	2.16009	2.90336	2.78412	3.17591	0.381451	0.171654	0.472897	0.388483	0.786833	0.0756205	0.627285	0.290843
YDL152W	YDL152W	10.2872	11.4458	8.93345	14.3968	9.65197	18.4082	13.4389	17.3651	0.967823	2.1653	1.2873	2.14596	3.92643	2.38949	1.98516	1.93749
YDL153C	SAS10	18.0194	20.9387	20.5681	29.5236	22.8871	32.5447	28.3786	27.4032	3.33804	6.71162	4.30713	6.58534	8.28908	6.96717	7.12498	6.14987
YDL154W	MSH5	3.00055	3.85232	4.18068	2.00692	3.40184	4.64592	2.88231	2.90647	0.283367	0.35522	0.286778	0.406624	0.525586	0.3789	0.485527	0.376899
YDL155W	CLB3	18.8308	17.1125	18.6926	18.0753	17.091	15.5257	19.2365	16.2433	6.2536	12.6054	7.33553	12.3257	11.7394	11.2474	11.546	11.7436
YDL156W	CMR1	2.82906	2.42984	3.54211	2.54675	2.63685	3.10074	3.05872	2.58674	0.494337	0.428227	0.549412	0.655099	0.412873	0.536095	0.541895	0.414697
YDL157C	YDL157C	37.3535	31.8854	42.49	44.1672	35.5802	40.607	47.1948	37.6719	3.78023	5.36976	5.48643	5.39193	4.98497	5.06168	5.09639	4.7709
YDL158C	YDL158C	29.8532	31.4351	34.217	20.7134	27.0262	37.0333	27.9554	29.7004	11.4126	28.5349	13.4316	29.7895	16.6158	21.8621	14.4791	20.0302
YDL159C-B	YDL159C-B	0	1.61677	0	1.48848	0	0	0	0	15.7277	16.8021	18.6633	23.4746	8.52822	11.3629	9.37221	16.5334
YDL159W	STE7	21.2244	18.5384	20.6217	17.7825	19.9931	15.5057	16.8913	17.5853	17.6766	29.6474	22.16	29.8829	25.1071	25.3186	22.5801	24.9485
YDL159W-A	YDL159W-A	13.7312	9.7616	10.822	4.16841	10.2747	3.24175	9.66848	14.1796	1.47914	6.31296	5.06172	5.61379	2.99616	1.86799	1.21822	4.23799
YDL160C	DHH1	81.7684	62.6458	73.615	59.2516	70.4201	44.0643	66.1064	65.1811	41.1173	62.3531	49.5458	66.3744	48.7839	46.8895	47.7554	48.5516
YDL160C-A	MHF2	19.5854	21.6545	26.5175	21.8347	22.2287	22.5092	22.6768	31.2244	2.52827	4.71167	3.82594	3.76985	5.72405	6.33817	7.17007	5.43353
YDL161W	ENT1	56.8512	72.5341	78.108	43.8869	71.1168	78.4012	50.8593	53.1279	6.67603	6.65036	7.10821	6.00956	6.43988	5.77374	6.21431	5.13182
YDL162C	YDL162C	0.205805	0.211863	0.380507	0.212343	1.03131	0.480556	0.339531	0.773323	0	0	0.14438	0	0.0890173	0.0857911	0.259138	0
YDL163W	YDL163W	1.76072	1.39519	1.88855	1.84122	2.98095	1.84967	1.17599	2.53138	0	0.393174	0	0	0	0	0.222067	0.110614
YDL164C	CDC9	9.50348	9.04065	11.4668	8.84802	10.0496	10.0931	9.89763	8.1736	0.608839	0.353406	0.619844	0.475898	0.250654	0.318364	0.354223	0.403376
YDL165W	CDC36	63.4922	66.6462	72.3029	59.6748	66.5285	65.553	65.5398	61.4913	14.653	28.9934	17.6131	32.4836	32.414	33.6842	31.2324	36.7686
YDL166C	FAP7	32.6296	24.4117	27.3732	40.9276	31.9194	24.5447	40.1755	34.7913	6.97149	12.4796	8.17289	12.1511	9.03158	9.12481	8.88307	8.79288
YDL167C	NRP1	3.89456	3.16978	3.4477	5.93209	3.15708	4.24453	5.35542	3.94327	0.715394	0.611454	0.646416	0.574459	0.748609	0.417543	0.660855	0.535553
YDL168W	SFA1	78.1215	60.1443	68.6484	63.9365	67.235	52.9557	65.4701	66.6328	144.428	168.939	151.206	186.209	151.056	148.419	148.874	161.888
YDL169C	UGX2	81.5011	95.715	96.3174	44.1352	89.9436	68.5016	59.4332	61.8134	136.739	228.563	178.188	247.71	231.541	237.642	223.314	250.1
YDL170W	UGA3	37.5818	24.1199	26.0656	29.3593	27.0364	15.6878	31.2129	25.665	39.768	46.9796	42.863	46.4913	26.1638	29.501	27.441	29.2017
YDL171C	GLT1	24.337	16.6501	20.4345	20.6592	20.006	15.8611	21.3996	17.5844	11.007	9.00402	11	8.82815	9.72884	7.18633	10.1755	7.51822
YDL172C	YDL172C	89.1966	89.3881	81.3174	68.8277	79.6061	76.2909	77.9935	76.14	22.6091	51.2573	25.3776	51.12	49.773	44.5216	36.3459	44.1072
YDL173W	PAR32	101.783	94.9913	101.086	85.9561	101.705	70.1276	78.7778	88.0169	37.2949	59.4864	40.2298	56.4242	53.9495	60.2623	56.9678	59.5135
YDL174C	DLD1	404.016	587.077	543.737	359.104	479.771	515.258	302.103	401.582	272.578	339.172	314.584	390.56	743.511	594.641	675.608	655.781
YDL175C	AIR2	20.5573	24.7104	23.7833	16.3928	23.8482	24.5552	16.1512	18.0328	11.5984	20.2861	12.8465	19.6466	15.7203	14.8189	15.3609	14.8242
YDL176W	YDL176W	11.7229	11.3545	11.0486	8.96911	11.2615	11.2815	10.6977	10.8182	6.58101	12.5197	8.15198	13.0891	8.94625	9.32446	8.08957	9.12194
YDL177C	YDL177C	12.4199	12.2075	11.3243	10.7529	11.7968	11.3997	10.9289	10.3965	4.7044	9.53275	7.6107	9.46013	4.02528	4.25493	3.3562	3.66885
YDL178W	DLD2	40.5174	37.3441	41.0226	37.6012	37.7126	35.083	33.8193	35.9697	14.2158	38.5489	17.5012	41.5502	22.9048	32.252	23.2292	32.2848
YDL179W	PCL9	8.18339	5.57823	5.00569	8.6439	6.01828	4.93243	7.34734	7.20641	3.4234	4.09049	3.93328	4.72863	2.05953	3.11441	2.00788	3.11923
YDL180W	YDL180W	35.3459	36.2747	37.4688	29.6924	34.3963	33.3625	32.4269	33.9563	60.6282	76.1493	77.4954	89.392	68.271	61.3822	68.9056	66.2892
YDL181W	INH1	505.551	725.884	779.467	320.527	621.248	665.638	495.708	481.681	542.287	729.584	678.524	794.261	852.578	787.737	820.882	854.155
YDL182W	LYS20	64.4799	75.5664	93.0732	60.9551	103.695	67.3491	83.0097	84.1448	93.2635	69.8764	94.4928	84.2554	69.3056	66.1534	72.2151	73.9518
YDL183C	YDL183C	19.6154	22.538	23.3554	15.984	22.6179	16.8276	17.741	19.7736	25.7837	41.8173	32.7706	43.0738	45.8001	43.7731	43.1658	45.5916
YDL184C	RPL41A	19689.1	22990.4	24407.4	20012.9	22087.3	29286.5	20997	20655.3	1096.51	881.09	1156.75	867.853	359.945	531.297	475.705	512.94
YDL185C-A	YDL185C-A	42.5935	51.4184	52.8514	35.6096	50.1664	49.8638	28.3845	29.9814	0.31966	2.47783	1.50325	3.90998	2.42833	2.19868	0.991272	1.74036
YDL185W	VMA1	134.932	149.727	162.056	126.785	149.791	160.031	124.209	125.993	13.1347	12.055	14.6495	12.8278	9.36009	9.59527	9.70402	9.97309
YDL186W	YDL186W	4.79871	5.81979	6.60402	3.28058	4.92931	6.46962	4.10413	3.54737	1.89666	2.42455	1.93205	1.78413	1.18654	1.22747	1.52538	1.18073
YDL187C	YDL187C	3.49287	3.90944	2.47794	1.47148	2.74465	2.93884	1.5883	1.68768	0.249348	1.21633	0.498712	0.742675	0.282016	0.211546	0.465376	0.670054
YDL188C	PPH22	69.6712	75.4909	84.9626	57.3495	77.4778	81.8828	59.2304	59.6695	7.84504	10.2521	8.65918	10.7477	8.5558	8.45534	7.9814	8.97189
YDL189W	RBS1	26.285	29.3547	28.579	27.1241	27.0751	29.8845	25.5376	23.7422	1.14854	1.46381	1.33445	1.42783	0.886162	1.07023	1.24479	1.0291
YDL190C	UFD2	30.6211	31.4008	35.0765	21.5395	31.2782	33.2981	25.0482	25.1396	3.05271	5.79325	3.78509	5.94531	6.36145	6.19374	5.80096	6.58803
YDL191W	RPL35A	1007.93	977.956	1111.47	1153.5	1070.67	1360.65	1235.94	1055.18	28.1498	22.7205	27.5114	19.9233	12.8903	14.6374	14.9354	13.5199
YDL192W	ARF1	244.509	226.46	241.513	274.014	249.098	284.368	277.436	251.577	31.5159	46.293	38.5621	46.1197	30.3568	27.3538	27.6439	29.4178
YDL193W	NUS1	63.966	63.3264	61.0439	54.2747	61.0955	50.3973	51.0254	59.4114	33.2001	42.7468	41.5127	44.2301	28.9186	26.8015	28.0847	27.7792
YDL194W	SNF3	18.3114	22.797	25.5509	11.1027	21.1809	21.6469	15.9156	15.3373	23.477	26.6227	25.4668	28.6054	35.9916	29.6897	31.568	29.321
YDL195W	SEC31	73.2161	79.1923	90.9247	62.6973	80.9014	75.6943	63.1387	63.7078	17.0468	18.9837	19.3072	19.9357	20.0934	13.7208	20.1461	14.5798
YDL196W	YDL196W	6.96624	8.98035	7.72478	5.10909	7.3874	8.38763	7.27139	6.73063	4.88931	4.51032	3.7243	6.26754	5.90898	4.43387	5.34539	5.10617
YDL197C	ASF2	20.4204	26.4993	24.4815	20.0392	22.6064	26.2798	18.6857	18.4525	20.4501	15.2	20.3871	15.9764	18.9832	13.0386	21.2385	13.9204
YDL198C	GGC1	52.4093	51.7516	57.0578	48.7812	58.55	58.9729	54.6664	43.2874	7.88278	11.2955	9.51777	11.2271	14.5318	11.9269	12.404	10.9894
YDL199C	YDL199C	25.9063	25.3997	26.4688	15.9348	23.864	19.5963	20.2008	20.4546	18.5306	20.0879	18.9494	21.2491	30.939	27.7098	28.4479	26.8703
YDL200C	MGT1	30.2741	32.4502	35.3519	18.4611	28.6243	30.3681	24.7504	21.6155	4.97191	5.99354	5.22058	6.40082	17.3972	13.0959	14.3222	14.3049
YDL201W	TRM8	31.5635	36.5262	34.9499	37.6881	34.6381	40.2614	31.2829	34.4155	2.55622	3.92766	3.20997	3.10312	3.47987	2.53108	3.96317	3.18193
YDL202W	MRPL11	46.5908	50.4976	52.4967	46.8662	50.2273	61.875	41.7804	43.2759	10.413	18.8489	13.1477	18.6986	13.1062	12.6377	11.7485	12.9781
YDL203C	ACK1	15.1829	12.598	13.9277	14.2814	14.2219	11.5769	13.1789	13.083	11.8178	20.7192	13.7576	20.8195	19.4005	18.6622	19.4792	18.6137
YDL204W	RTN2	390.114	494.381	505.846	230.004	428.091	330.307	295.091	353.802	59.6326	47.6705	60.3896	49.8626	86.6266	85.1945	90.2685	96.7409
YDL205C	HEM3	36.7283	52.2136	59.2412	30.4371	43.1215	55.5417	33.3283	37.7821	11.0502	8.4511	12.1915	9.58729	8.55252	6.86237	9.10965	6.19034
YDL206W	YDL206W	35.2421	31.8369	30.4602	26.2033	28.3438	26.7316	28.2829	31.1353	1.77703	4.82309	2.49443	5.64675	7.49494	9.04864	6.67644	10.0435
YDL207W	GLE1	42.2823	54.5425	48.0249	36.5085	47.5781	57.0933	36.0215	41.2813	3.99832	6.75208	4.27872	6.35689	5.45621	6.21923	5.40266	5.5262
YDL208W	NHP2	195.032	142.371	145.086	296.989	175.19	164.768	281.38	257.419	14.9904	31.6856	17.4849	23.5617	16.1631	13.1147	16.186	11.9535
YDL209C	CWC2	9.17945	6.50333	6.63486	8.40132	7.26882	6.03326	7.35632	8.10733	7.36297	12.0373	8.29353	12.5413	7.37157	6.24394	8.60681	6.75844
YDL210W	UGA4	1.10387	1.11268	1.26625	0.786047	1.12865	1.19844	0.807971	0.788358	1.24753	1.51853	1.48272	1.66477	8.4495	7.82338	8.51279	9.08618
YDL211C	YDL211C	4.44579	2.74002	3.82445	4.056	3.67578	3.18424	3.58201	3.722	0.322118	0.349809	0.338421	0.270483	0.478541	0.189207	0.230488	0.165349
YDL212W	SHR3	222.237	220.176	223.943	219.318	219.084	216.957	191.224	209.993	16.613	28.1193	19.6088	27.5869	27.9526	29.5143	30.037	28.1928
YDL213C	NOP6	92.9212	90.3156	78.0298	124.859	93.0974	95.843	111.706	108.998	20.0318	44.4538	22.7076	45.0466	33.4044	34.9404	32.2824	33.4257
YDL214C	PRR2	220.701	155.87	131.048	177.513	142.75	75.4301	158.732	179.29	35.5157	53.4793	41.1628	55.0215	58.3668	68.6848	54.4476	73.0474
YDL215C	GDH2	56.6972	52.3608	55.7474	38.4185	51.9004	42.1632	41.6821	42.8829	36.4485	45.1674	42.2577	49.19	64.7712	53.1724	56.2805	50.8346
YDL216C	RRI1	21.98	18.2743	16.7793	18.8219	17.3996	18.2136	19.74	18.0552	1.09548	1.90296	1.47817	1.79712	2.47212	2.63156	2.26347	2.19022
YDL217C	TIM22	30.6225	29.881	33.7375	27.7857	32.9974	33.9903	27.126	27.3248	9.98894	20.5485	12.3894	21.0068	19.2924	22.1256	18.5979	21.7563
YDL218W	YDL218W	13.46	19.1407	17.232	9.2646	15.8869	15.1687	10.0187	11.4645	2.28763	3.04355	2.42095	2.71765	3.60428	3.22967	3.6025	2.56314
YDL219W	DTD1	40.5697	40.2022	38.5934	40.5923	38.1595	38.504	42.453	39.4556	1.11732	1.26199	1.27051	0.722432	0.606085	0.289211	1.11428	0.665411
YDL220C	CDC13	5.71762	5.57751	6.3104	4.5563	5.65191	6.00322	4.98318	4.9533	0.974917	0.907096	0.886996	0.806847	1.50227	1.11726	1.42281	1.24919
YDL221W	YDL221W	25.5051	28.7186	25.5081	19.3406	24.6361	31.5914	20.8069	21.1102	9.64306	8.38521	9.56547	8.12528	10.9972	10.9196	10.5997	10.3918
YDL222C	FMP45	1289.13	1208.74	1198.78	606.151	1141.16	483.268	909.079	994.045	337.278	543.431	387.279	618.161	766.749	880.241	785.165	1024.63
YDL223C	HBT1	274.877	308.404	310.634	159.414	282.932	196.224	198.112	233.365	99.3692	99.4802	90.0197	102.256	271.395	255.766	275.491	280.3
YDL224C	WHI4	33.6801	33.3885	41.1301	30.3791	34.3689	30.1669	31.7342	30.6999	8.51273	13.8528	10.3674	14.8199	9.92134	9.87811	12.1216	11.1925
YDL225W	SHS1	25.7397	22.89	26.7723	21.5942	25.6813	23.893	23.7414	23.5335	3.49074	4.97385	3.90325	4.78379	5.52568	4.44299	4.62625	4.13595
YDL226C	GCS1	27.0875	31.897	38.7377	25.5125	31.3885	41.4926	27.6675	26.0443	1.68916	1.97804	2.02586	2.03827	1.57112	1.28562	1.96783	1.46525
YDL227C	HO	7.06892	5.45759	6.89613	7.53479	5.37408	3.9508	6.34649	6.43343	1.5718	2.20845	1.5902	2.37625	1.93728	2.00798	1.83247	2.02984
YDL228C	YDL228C	499.076	406.608	434.543	701.991	489.755	558.447	675.849	508.598	11.5266	16.9703	13.535	18.3208	5.58663	6.71578	6.27917	6.45625
YDL229W	SSB1	221.421	179.698	206.152	322.738	209.053	237.577	256.655	232.905	7.28268	6.37219	9.91549	5.91017	5.75586	4.52728	6.20102	4.73416
YDL230W	PTP1	43.053	53.2355	51.0975	35.8783	50.3311	47.3621	33.4046	41.6872	21.1994	30.352	25.1359	30.0868	19.451	19.8976	19.5661	21.4093
YDL231C	BRE4	26.9532	27.3327	30.8287	23.2099	27.6875	28.7887	22.6178	22.423	15.6043	23.9516	18.079	24.0461	23.3394	21.8493	21.5532	23.2162
YDL232W	OST4	328.764	338.132	412.332	322.365	394.918	478.688	351.025	293.056	35.2229	57.4138	41.427	50.9572	34.3299	25.8974	37.941	38.6707
YDL233W	MFG1	22.8253	23.1574	24.1405	18.3221	21.8252	21.1295	20.5546	20.2078	11.2807	20.5529	12.7442	20.2198	25.7801	22.9593	23.4668	24.8058
YDL234C	GYP7	55.2006	57.3566	57.8202	41.2945	55.7135	52.7066	44.9072	47.7577	51.5066	71.9401	57.6264	73.8286	131.518	102.813	119.016	98.3916
YDL235C	YPD1	79.4811	70.4997	84.7892	76.7229	71.0078	86.7032	76.7155	72.6478	3.40345	4.5486	4.52835	4.45228	5.67919	4.12418	6.54111	4.14403
YDL236W	PHO13	62.0904	54.8411	55.5733	77.9408	56.9142	52.3567	64.8697	60.1637	1.08833	0.775583	1.48807	1.10392	1.72362	0.78606	1.3553	0.979979
YDL237W	AIM6	52.2614	67.1211	73.4687	43.8597	63.1769	74.0712	43.6564	44.7313	8.19009	8.80776	8.13145	9.50459	22.9778	18.4355	20.101	21.4619
YDL238C	GUD1	14.7202	18.9653	19.49	9.80546	16.6223	22.4347	11.4773	10.6261	3.27339	3.36528	2.70865	3.36295	7.77962	6.91181	7.02243	6.75528
YDL239C	ADY3	7.40316	9.03635	9.05671	4.61076	6.83569	9.13933	5.87181	5.59274	0.561725	0.370883	0.564942	0.533704	1.05046	0.761612	1.00277	0.697127
YDL240C-A	YDL240C-A	1.91835	4.51769	0.781193	2.58656	2.38246	5.23796	0.691989	1.39284	0	0	0.46781	0.519114	0	0.572507	0	0
YDL240W	LRG1	3.24175	3.26683	3.71758	2.57945	3.35463	3.84985	3.25105	2.57529	0.272271	0.370336	0.320104	0.385613	0.62654	0.513803	0.485512	0.412874
YDL241W	YDL241W	13.8997	11.4644	16.0672	24.2581	14.5399	20.4242	24.7621	18.1919	0.256333	0.156803	0.201927	0.457407	0.74796	0.479377	0.2417	0.459673
YDL242W	YDL242W	7.41052	6.55712	10.2999	5.06244	6.01662	9.63091	6.08575	6.95238	2.02186	1.95769	2.27033	1.74062	2.34775	3.48036	2.27828	2.7537
YDL243C	AAD4	5.76896	8.63238	8.78688	5.93721	8.18948	9.43514	5.76497	6.45518	3.11982	2.12342	2.75443	2.80269	2.69254	2.27895	2.18115	2.43011
YDL244W	THI13	0.58766	0.240803	0.40577	0.410673	0.335699	0.528946	0.588859	0.276186	0	0	0.0641127	0.0843534	0.168323	0	0.117541	0.0415628
YDL245C	HXT15	2.56275	5.03974	4.55836	1.99209	3.73236	5.94905	2.65403	2.93122	0.784409	0.824189	0.790631	0.937807	1.30466	1.55172	1.23611	1.51532
YDL246C	SOR2	0	0	0	0	0	0	0	0	0	0	0	0	0	0	0	0
YDL247W	MPH2	2.04387	3.25691	4.01777	1.9335	2.38771	4.94554	2.70281	2.08242	0.752811	0.772579	1.01985	1.00019	1.54396	1.55125	2.09142	1.55809
YDL247W-A	YDL247W-A	9.4007	13.2583	13.8966	6.01203	12.263	17.4514	16.8946	16.905	1.0498	1.26698	4.27758	6.10955	22.2313	18.2424	9.55658	9.16429
YDL248W	COS7	17.294	22.2372	19.7454	15.3117	17.6347	21.5	13.6368	14.7928	5.20213	4.4462	4.96794	3.59311	3.28587	3.5446	2.82312	3.38326
YDR001C	NTH1	259.07	310.14	282.503	204.772	271.737	281.179	201.754	243.562	241.65	285.587	287.39	304.785	316.341	286.007	303.519	293.929
YDR002W	YRB1	310.061	238.792	231.696	331.867	259.727	234.36	306.042	336.775	220.061	215.398	277.083	236.615	104.126	128.126	119.056	143.046
YDR003W	RCR2	104.057	84.6764	81.3575	106.641	84.8173	70.907	89.4046	96.0774	267.612	318.342	307.937	338.129	320.706	287.216	306.486	291.643
YDR003W-A	YDR003W-A	712.262	755.927	625.728	670.518	679.898	782.859	508.072	764.083	904.637	1379.98	1105.48	1606.69	1304.7	1330.43	1220.29	1385.41
YDR004W	RAD57	25.2726	26.7567	25.6355	23.7826	25.1896	22.8804	21.4661	21.6341	7.33349	13.8722	8.60395	15.577	13.9153	16.1357	12.6057	18.412
YDR005C	MAF1	34.8971	29.2045	28.2071	29.8073	30.4259	26.6292	32.3914	27.5926	16.6094	29.0712	19.9475	29.3892	27.9282	25.2485	26.4024	24.027
YDR006C	SOK1	34.6017	31.8604	32.4265	31.355	31.4129	25.8487	30.6891	30.7335	31.7057	62.1833	39.5147	62.1054	57.6692	55.8524	55.9487	57.7088
YDR007W	TRP1	50.0627	75.1618	67.882	43.097	61.0384	78.4236	46.5078	50.2629	59.3487	104.846	61.1442	96.384	104.47	98.0118	103.775	97.4389
YDR008C	YDR008C	35.2693	50.643	46.2541	28.5268	39.62	56.7204	27.4186	31.0918	17.3357	40.3657	21.151	46.795	43.2711	36.3322	33.5765	38.4869
YDR009W	GAL3	5.55726	6.20366	6.8545	4.86409	5.74373	7.87775	5.17066	4.15969	4.64957	5.55496	4.82552	5.7942	15.1156	10.1479	13.9684	10.7048
YDR010C	YDR010C	9.29003	13.019	11.4725	7.42499	9.30456	13.123	8.68925	6.99442	7.06369	7.2724	8.38877	6.62899	15.6449	9.98947	11.9848	8.83977
YDR011W	SNQ2	68.7068	28.8015	31.1265	126.289	31.4256	25.2252	97.5749	56.5094	21.7056	29.4192	23.3848	30.7679	84.4627	44.1801	71.8108	46.25
YDR012W	RPL4B	323.684	365.368	372.578	433.81	385.728	449.556	366.737	333.532	6.65411	9.17866	8.79057	7.66403	8.29329	6.73986	8.34328	6.77317
YDR013W	PSF1	28.2779	28.7896	28.3095	26.4809	27.4448	25.4414	25.3964	26.2805	1.27677	2.37645	1.40151	2.1951	1.7839	1.29079	1.72304	1.44544
YDR014W	RAD61	8.77365	6.83418	6.30619	6.70017	6.7874	5.58035	7.59678	7.56099	0.854899	1.72804	0.764418	1.5151	2.11342	2.48019	1.9954	2.11178
YDR014W-A	HED1	2.15446	2.36758	2.73753	1.41163	2.09793	2.62225	2.36371	1.63613	0.662513	0.613641	0.651977	0.396187	0.48594	0.719378	0.626633	0.591453
YDR015C	YDR015C	0	0	0	0	0	0	0	0	0	0	0	0	0	0	0	0
YDR016C	DAD1	118.275	142.013	141.988	98.7239	140.417	157.943	108.866	115.146	15.5928	36.9815	15.9152	34.1785	28.7791	28.2845	29.5552	34.2743
YDR017C	KCS1	17.8174	17.2203	18.699	16.1377	16.9356	16.7538	15.2966	15.8525	3.17228	5.95863	4.26719	6.52746	7.8341	6.98699	7.38628	7.41075
YDR018C	YDR018C	20.6708	26.3713	28.1003	11.7145	23.3321	23.6367	15.763	17.721	18.4094	18.6248	18.4391	20.2168	31.0986	28.4507	27.2977	28.8274
YDR019C	GCV1	59.1807	102.596	103.224	98.7274	81.4623	95.3571	80.7073	81.581	103.848	214.393	110.42	265.162	133.142	200.578	175.365	247.906
YDR020C	DAS2	8.23944	8.54987	8.84866	9.17058	8.32917	8.87903	8.57617	8.42498	3.06026	5.64328	2.92404	7.44967	4.00761	6.96261	4.59758	7.45898
YDR021W	FAL1	5.1883	3.33969	3.288	4.73687	3.91925	2.63881	4.18429	5.00989	1.13571	2.27365	1.28816	2.11945	1.74757	1.33085	1.86283	1.02053
YDR022C	ATG31	34.4001	39.7934	37.7188	29.2673	34.1537	39.7379	26.7904	31.399	12.2469	22.0101	15.9983	23.6417	19.5481	20.872	18.8846	23.839
YDR023W	SES1	126.343	135.41	146.647	132.704	141.746	163.684	126.697	138.862	2.12706	2.23707	2.87682	2.02986	2.13806	1.05702	1.94789	1.2094
YDR024W	FYV1	4.22516	3.61714	3.53135	2.59027	2.90162	2.86715	3.54461	4.03089	0	0	0.0877388	0.0499781	0.10898	0	0	0.0497477
YDR025W	RPS11A	396.435	358.615	435.506	528.048	433.294	505.599	529.986	416.055	13.8604	11.6283	15.0943	10.9277	5.08309	4.08134	6.1319	4.59347
YDR026C	NSI1	14.3029	16.3112	15.5535	12.9215	14.9756	19.7594	13.68	13.1651	1.78442	2.62211	1.91135	3.02323	3.22293	2.48258	2.76301	3.10914
YDR027C	VPS54	26.992	28.0673	30.6141	21.6355	28.4043	29.6753	23.6451	23.1832	7.1595	12.2842	8.52012	12.1806	11.8553	11.8501	11.7797	11.4072
YDR028C	REG1	45.7289	62.5775	63.6237	36.3256	55.1171	72.5186	37.6	41.8129	36.2097	58.3476	43.4367	57.5404	70.8555	63.7527	67.2982	65.7109
YDR029W	YDR029W	52.4926	55.4883	61.9545	42.6752	56.0153	54.9061	46.4418	47.2967	34.9131	83.8911	47.4153	92.0316	71.2553	80.3747	68.1127	72.6097
YDR030C	RAD28	8.4167	8.41239	8.57112	6.11265	8.06224	7.54941	6.5087	8.0686	12.2752	15.616	13.6122	16.433	14.0289	15.2677	13.2792	15.3327
YDR031W	MIX14	76.7954	98.632	86.7408	49.6681	79.1463	88.679	61.1101	69.0174	21.3356	38.346	24.2206	40.4273	35.3378	41.8978	38.0917	41.5173
YDR032C	PST2	376.88	486.006	541.148	258.429	447.935	521.024	305.168	339.482	56.5014	96.1456	62.5797	95.1629	87.2147	96.6341	87.5849	103.005
YDR033W	MRH1	182.479	149.763	163.366	246.481	140.985	91.8727	160.796	209.842	8.62808	8.71455	10.2606	9.23299	10.5151	9.49618	10.7278	10.5912
YDR034C	LYS14	16.4065	16.5666	17.9928	12.0179	16.6026	17.0111	14.833	13.8807	6.09442	10.9902	7.4839	11.5222	10.5523	10.4186	9.9052	11.0402
YDR034C-A	YDR034C-A	204.058	253.023	228.578	186.586	214.981	255.046	152.154	185.854	8.97389	38.3824	15.1583	40.0734	39.1254	30.2635	22.5689	28.225
YDR034C-C	YDR034C-C	0	0	0	0	0.120551	0.0269445	0	0	0	0	0	0	0	0	0	0
YDR034C-D	YDR034C-D	0.352132	0.197976	0.258565	0.337493	0.228978	0.11398	0.227502	0.156415	0.0276727	0.0530196	0.0106153	0	0.0169671	0.0677543	0	0.032612
YDR034W-B	YDR034W-B	803.827	690.026	714.228	480.539	688.526	384.3	508.839	700.82	760.56	1924.46	866.838	1885.96	2819.91	2901.43	2553.04	2764.05
YDR035W	ARO3	66.7223	62.9219	71.6143	66.3123	69.5174	72.7829	69.9596	62.2529	33.1633	49.2823	38.1734	47.5146	61.4923	49.0924	59.575	49.7547
YDR036C	EHD3	13.0438	16.5603	20.1853	10.9998	16.3794	18.9607	10.778	12.2221	1.79577	1.80971	2.1595	2.18272	2.37615	1.96948	2.33778	2.28219
YDR037W	KRS1	50.1654	41.5698	45.3233	61.8963	50.1194	39.2711	54.9213	54.6247	2.50136	2.96562	2.58501	2.30406	4.03481	2.7402	4.2499	2.50869
YDR038C	ENA5	259.96	160.825	159.418	223.081	155.22	85.4192	229.102	212.337	70.1373	100.384	76.611	100.328	147.882	108.144	138.534	118.936
YDR039C	ENA2	0.13164	1.57026	1.06361	0	7.90409e-05	31.0338	0	1.78336e-10	8.17109	26.9971	3.66873	16.7851	13.7896	20.3137	10.8383	13.0372
YDR040C	ENA1	312.881	184.866	178.742	279.356	179.942	75.324	275.611	251.808	96.0924	150.381	97.7638	152.532	190.103	153.362	185.003	161.541
YDR041W	RSM10	292.497	231.026	226.016	306.046	213.48	180.397	248.35	237.551	126.797	347.025	150.576	343.929	247.161	286.491	236.158	272.423
YDR042C	YDR042C	12.9855	8.74084	10.0928	10.1989	8.44688	5.17436	7.98406	9.86589	2.78619	6.87168	3.311	4.66613	3.88286	4.69443	3.82822	4.54105
YDR043C	NRG1	61.4279	43.1082	43.2059	61.1983	42.6874	32.0303	56.1497	52.0614	73.6114	140.433	79.2912	139.126	111.359	122.436	110.297	125.556
YDR044W	HEM13	35.9253	24.6829	34.0152	31.8368	27.5039	39.9205	31.0951	25.6451	4.6511	3.6522	5.56945	3.37373	5.06155	3.13865	6.0509	3.34316
YDR045C	RPC11	28.1023	26.7547	38.2894	32.0951	26.6052	34.634	35.6515	26.9785	1.31959	1.70004	1.95467	1.65725	2.30661	1.74573	2.82568	1.39575
YDR046C	BAP3	60.0034	55.4365	70.2046	72.9521	67.359	96.9023	74.2881	50.0737	8.72534	4.08022	9.27097	4.22544	6.30321	4.35942	5.89109	4.73627
YDR047W	HEM12	129.611	157.066	146.138	150.931	145.102	167.273	131.744	138.582	10.0217	6.17538	9.11582	6.57984	5.45364	4.99175	5.43695	5.03741
YDR048C	YDR048C	3.74073	3.37939	4.38677	2.30854	4.16509	5.07909	3.76458	3.52126	0.0857815	0	0.089972	0.202936	0.22129	0.361716	0.214867	0.205985
YDR049W	VMS1	12.5777	15.1654	14.8183	12.3373	13.3663	14.4213	13.123	11.7214	1.59267	1.50304	1.63325	1.35893	1.79334	1.58941	2.2422	1.37806
YDR050C	TPI1	2034.75	1886.21	1927.61	2360.13	1980.68	1875.25	2170.71	2083.85	25.0517	22.895	24.8128	24.7736	10.3098	8.62042	10.2967	8.9605
YDR051C	DET1	34.0264	38.7643	39.0483	33.5178	39.4129	41.1661	31.8445	32.3348	7.06529	10.5836	7.25517	10.0391	9.84379	10.8551	9.4052	9.64351
YDR052C	DBF4	18.6731	18.8858	19.6862	14.8868	19.0495	17.0946	16.8571	15.9706	2.74411	4.37614	3.1276	4.05829	4.20694	4.04244	4.39497	3.54966
YDR053W	YDR053W	12.3853	8.05625	12.9808	9.332	10.1584	7.47543	13.7926	11.0992	2.70489	2.71413	2.36025	3.00576	2.48058	2.47438	3.41088	2.7935
YDR054C	CDC34	128.032	136.338	132.768	97.7909	129.152	120.661	107.964	112.547	248.736	378.498	291.75	411.226	380.677	357.715	362.885	365.855
YDR055W	PST1	30.1533	31.7607	27.4208	33.3507	26.2693	93.9551	28.7838	30.5771	17.3018	35.0727	25.626	48.2596	42.9014	68.862	44.1253	83.312
YDR056C	YDR056C	70.4701	75.7197	83.611	62.7331	75.2082	78.4727	67.7303	62.8939	6.48172	11.8228	7.48914	12.1521	11.4961	18.1076	10.7301	19.17
YDR057W	YOS9	18.3474	20.5484	21.9177	14.8646	20.7063	21.2644	17.7238	16.3393	1.66824	2.2589	1.35067	2.32574	2.41179	2.82698	2.09021	2.72959
YDR058C	TGL2	30.625	28.349	27.6709	27.6061	24.4818	24.6543	22.643	25.863	2.19527	3.82204	2.39222	3.73439	2.36649	2.77931	2.48794	2.59371
YDR059C	UBC5	48.101	64.0295	56.9779	31.5788	53.1359	75.7803	37.2989	40.6878	33.1305	68.1498	42.1492	70.8576	72.1427	86.838	65.9067	84.6819
YDR060W	MAK21	12.7732	15.5584	14.4569	21.259	15.1514	22.8602	19.0544	18.1699	1.22656	1.67001	1.71719	1.77362	1.68919	1.2263	1.65918	0.95362
YDR061W	YDR061W	35.278	38.725	37.9902	30.6094	36.7186	38.0214	29.2567	31.061	12.7315	17.3563	13.7349	17.0573	14.041	14.2116	13.9436	14.0356
YDR062W	LCB2	57.0323	56.6672	68.601	55.7849	62.169	69.9849	58.4796	52.7883	4.15875	5.06261	4.99703	4.63648	6.07511	5.51617	6.26887	5.46047
YDR063W	AIM7	198.027	244.789	250.495	177.328	228.594	262.722	177.583	189.447	5.64466	5.56351	6.07226	5.33383	5.87843	3.79953	6.45844	5.26801
YDR064W	RPS13	726.742	652.247	740.471	993.701	757.288	958.965	927.619	755.05	35.2047	38.9569	39.6129	43.9548	11.3381	15.5701	14.5714	16.9032
YDR065W	RRG1	9.89043	10.4358	10.1432	11.9106	8.69908	11.0555	8.70157	10.0356	1.10275	1.21604	1.44442	1.59023	0.903321	1.19621	0.670789	1.03151
YDR066C	RTR2	25.5557	27.0634	25.6072	25.2187	23.6358	25.6052	23.3204	25.3854	1.32228	3.55128	2.64434	3.5878	2.42808	3.03734	2.783	2.83975
YDR067C	OCA6	35.239	27.1501	29.7843	34.106	30.6578	24.5186	33.6294	32.7227	4.33483	10.4768	6.89668	13.167	9.90474	11.2193	9.66215	13.1387
YDR068W	DOS2	58.0907	73.1953	62.5175	56.4672	64.0864	67.3084	52.3252	62.4433	13.8589	24.773	17.0824	26.4697	15.085	21.0058	16.1045	23.2729
YDR069C	DOA4	34.3173	27.3292	27.7295	27.8743	26.6147	20.3967	27.1996	28.4972	24.4958	40.4599	31.6688	43.6075	36.6637	35.8396	35.8481	37.1524
YDR070C	FMP16	865.763	935.4	866.605	578.386	805.605	541.035	694.335	815.526	1433.82	1555.88	1682.26	1802.58	2254.08	2370.44	2342.31	2731.1
YDR071C	PAA1	169.087	155.961	173.372	156.672	161.604	156.96	160.779	148.203	63.3442	107.886	79.2247	115.688	120.657	95.9636	115.288	100.659
YDR072C	IPT1	122.069	78.1034	74.6023	164.717	76.6804	65.7529	120.938	101.802	22.4986	39.6874	29.532	42.1432	62.1062	49.7763	52.1506	50.0334
YDR073W	SNF11	96.3137	97.6783	97.5248	95.8766	87.4553	98.9563	90.7469	84.7126	28.7811	29.0842	30.0518	29.4635	54.502	41.8646	50.4873	44.5524
YDR074W	TPS2	590.179	582.952	598.869	484.017	559.944	492.424	496.839	499.728	103.157	97.2196	119.221	111.539	189.395	145.15	191.618	166.257
YDR075W	PPH3	13.4296	12.1696	12.571	12.0677	13.0306	8.71962	11.646	11.6367	2.91301	5.40487	2.94943	5.07744	6.88769	5.46054	6.81679	6.13928
YDR076W	RAD55	12.9041	14.9428	15.0059	9.14762	12.0684	13.6446	8.90689	9.75897	1.69489	3.46136	2.21931	2.9022	3.62527	2.71701	2.99485	2.70176
YDR077W	SED1	2403.67	3138.72	3247.12	1706.76	2842.69	4351.79	1824.92	2257.23	750.304	1142.21	843.538	1185.2	1645.46	1857.23	1525.08	1984.44
YDR078C	SHU2	25.0892	24.1326	22.5691	21.7401	21.4694	22.6632	22.0155	23.2932	16.8083	25.87	19.5643	29.1255	20.4107	19.8008	16.9005	20.0456
YDR079C-A	TFB5	69.8728	80.4301	84.7358	54.023	77.9928	90.7277	62.3763	74.6524	15.4432	30.7656	18.8839	31.0987	31.7432	38.2601	31.1741	42.0801
YDR079W	PET100	110.668	137.437	122.785	85.595	122.056	133.876	94.6891	106.215	151.191	289.279	179.623	310.008	257.37	286.847	234.815	299.33
YDR080W	VPS41	13.6517	14.2401	13.8923	11.5395	13.5991	13.7963	11.8639	13.2866	1.74355	3.20792	1.99675	3.4769	2.49174	2.60291	2.20403	2.45419
YDR081C	PDC2	11.143	10.5862	11.3435	8.99133	10.4688	10.0346	9.86535	8.96662	2.64834	6.67856	3.34642	6.53071	5.46753	6.4131	5.20004	6.32036
YDR082W	STN1	13.2232	13.8593	13.1267	10.7273	13.2297	11.5889	10.6525	12.0043	5.42048	14.7253	7.38524	16.5383	12.8676	14.8932	12.8348	14.8588
YDR083W	RRP8	18.0096	15.6659	16.3995	29.0118	18.1762	19.273	27.8424	24.0608	3.10904	8.21266	3.70942	7.42832	8.36442	7.69896	7.32226	6.76405
YDR084C	TVP23	66.8905	73.9321	85.9393	61.4238	72.6742	87.7552	63.1263	60.1491	3.3912	3.86075	3.81949	3.84714	6.12632	4.95618	5.17826	4.8288
YDR085C	AFR1	43.1122	41.5027	41.7629	31.1113	44.1441	61.3091	33.4107	39.9028	2.56154	5.03749	3.52578	5.6649	7.17016	9.3375	7.13812	10.3333
YDR086C	SSS1	539.124	508.988	549.849	496.846	519.106	572.411	516.938	528.991	11.5177	26.2507	22.5142	29.831	22.0018	23.7681	24.1334	21.0549
YDR087C	RRP1	50.6872	47.8134	43.2592	64.6057	52.9089	48.7187	59.1545	64.8902	1.91129	2.23209	2.23761	2.2304	2.24593	1.51965	1.73769	1.41291
YDR088C	SLU7	31.4514	39.0677	33.98	30.4671	32.9092	32.8318	25.6874	31.2492	17.6634	32.2553	19.8415	33.4205	21.8244	22.9736	20.2482	21.7969
YDR089W	YDR089W	24.856	23.8553	29.0416	20.7991	26.1595	22.969	23.2415	19.2739	3.07051	6.55588	4.00648	7.96297	5.00934	6.70176	5.94461	7.32106
YDR090C	YDR090C	26.6462	22.8601	27.7679	20.0089	25.0077	19.1433	24.5022	21.0471	14.8687	23.3184	19.8075	25.0003	18.262	17.6226	16.5011	19.6101
YDR091C	RLI1	23.6467	17.8589	21.2921	32.7687	22.0849	25.5934	24.6122	24.9706	1.37279	1.27656	2.03313	1.44687	1.86041	1.05244	2.01392	0.870377
YDR092W	UBC13	102.808	106.034	102.795	96.3699	110.465	96.891	89.9218	92.697	45.0609	93.5254	49.7609	90.8486	82.8097	89.7125	83.5865	86.8524
YDR093W	DNF2	17.7746	20.4709	20.8155	18.2207	18.5114	24.3992	17.1188	16.4054	2.77048	4.46198	3.25681	3.65166	6.20656	4.96422	5.21216	4.47177
YDR094W	YDR094W	37.5024	51.1117	46.8201	48.7587	47.8304	56.8303	42.3447	37.1062	6.824	11.8043	6.35122	8.34746	11.0133	8.39623	9.61004	7.60242
YDR095C	YDR095C	3.4057	4.6988	5.29962	2.35446	4.17655	3.53709	2.6697	2.16723	1.25017	1.06803	0.969869	0.453165	1.41248	1.01431	0.615058	0.518918
YDR096W	GIS1	86.2583	62.8032	62.0725	73.7941	61.764	41.7327	70.5277	69.5434	44.3731	91.2092	52.7513	93.2516	130.838	108.112	111.281	103.878
YDR097C	MSH6	5.17013	4.35082	5.53547	5.53593	5.6894	5.47534	5.74629	4.47712	2.04578	3.12916	2.11871	3.07176	4.45291	3.30264	4.40466	3.14273
YDR098C	GRX3	99.4282	73.1979	74.5956	96.8841	86.8698	66.8518	86.4596	87.0855	17.0763	36.8264	21.402	36.9603	20.4693	22.8433	20.4692	20.9434
YDR098C-A	YDR098C-A	6.55686	2.79782	4.77471	0.000174479	7.03687	4.38728	4.95362	1.83325	8.13836e-10	0.00180439	1.88743e-05	1.41915	0.0192337	0.000138515	0.0131152	0.0462814
YDR098C-B	YDR098C-B	0.0206592	0.0228466	0	0.0238916	0	0	0.0214026	0	0	0	0	0	0	0	0	0.0200385
YDR099W	BMH2	345.615	388.365	457.799	235.688	391.779	384.456	278.566	287.258	113.818	210.851	136.079	225.029	231.407	243.17	216.284	243.54
YDR100W	TVP15	165.057	206.627	207.354	121.481	184.964	192.458	143.344	145.037	8.32823	16.1043	8.1594	15.7945	10.4412	15.8405	11.3635	15.3743
YDR101C	ARX1	9.1055	6.87288	6.73118	17.8507	8.35051	10.1123	16.2165	12.5846	2.31052	2.50008	2.82687	2.63486	2.56401	1.7391	3.15729	1.91584
YDR102C	YDR102C	2.43863	1.19441	2.4379	2.03588	1.88999	1.62347	2.55566	1.62371	0.310492	1.03891	0.651555	1.38104	1.00288	0.872866	0.779498	1.3027
YDR103W	STE5	2.66744	3.7887	4.20574	2.07333	3.14569	3.68774	2.46071	2.16267	0.329609	0.529419	0.481722	0.729585	0.597295	0.36555	0.665824	0.642762
YDR104C	SPO71	7.94979	8.87487	9.02656	6.33063	8.26098	8.69898	6.79648	6.72701	1.93617	3.54245	2.50938	4.05373	6.99456	6.61598	6.13868	6.47595
YDR105C	TMS1	38.6525	41.3469	41.3468	30.0986	38.4199	33.3289	32.9841	33.3565	21.3693	21.7847	22.7885	23.0651	32.5851	24.3723	28.7599	25.5411
YDR106W	ARP10	4.04078	4.9606	4.84478	3.72367	4.254	4.57702	3.89057	4.13435	1.2408	2.02915	1.0386	2.12563	2.74701	2.31473	2.15827	2.26985
YDR107C	TMN2	8.731	9.28176	9.56502	7.16397	9.16838	8.71669	8.088	7.19737	0.366958	0.513694	0.476366	0.679051	0.957129	1.02226	0.784086	1.32242
YDR108W	TRS85	8.10494	7.64144	8.4752	6.90631	8.09884	7.99913	7.60551	7.01992	0.338311	0.406495	0.355529	0.384311	0.682063	0.532681	0.647423	0.496147
YDR109C	YDR109C	10.8242	9.93975	12.1158	9.00936	10.6504	10.8061	9.5253	9.84148	1.45291	2.39318	1.63997	3.19898	3.57075	3.82191	3.85276	4.77001
YDR110W	FOB1	7.96779	8.05232	8.11406	8.65042	8.10818	8.45577	8.47739	8.66471	1.26843	1.65296	1.36941	1.95417	2.16158	1.91649	1.98115	1.9559
YDR111C	ALT2	27.5496	28.0776	28.2492	21.408	26.5041	21.7028	25.5761	21.1586	8.53216	10.1228	10.3068	12.1559	10.97	10.5371	10.7243	11.5222
YDR112W	IRC2	29.9876	22.1609	26.5522	18.3936	25.7861	13.703	25.8027	21.8237	5.0895	4.5469	5.72073	6.94263	6.21336	6.33517	7.90086	5.34562
YDR113C	PDS1	21.5049	17.8938	17.5368	20.2378	18.0331	10.4085	19.4599	18.6364	1.85683	2.77229	2.15616	3.43787	3.00904	1.66318	2.61578	1.78013
YDR114C	YDR114C	2.75467	1.84262	2.38178	1.56412	2.06713	1.43978	2.27508	1.04303	0.832157	1.56503	0.67651	1.09242	1.06708	0.345872	1.15258	0.995527
YDR115W	YDR115W	176.845	205	205.363	156.667	188.732	194.955	151.94	160.27	42.9303	81.3624	51.3833	88.6091	80.8317	82.3564	70.9017	78.3103
YDR116C	MRPL1	48.2476	63.6415	68.2341	45.9547	57.4867	78.4237	44.5286	43.6951	9.97979	17.5823	12.3888	18.4201	19.5512	15.158	18.2657	15.2031
YDR117C	TMA64	16.2589	15.6538	16.6555	14.4906	16.6234	15.9777	15.367	14.7711	1.20128	1.80873	1.42698	2.30538	2.87628	2.32565	2.66876	2.47277
YDR118W	APC4	8.61708	8.96578	9.74178	6.27953	9.61222	8.70529	7.50121	7.502	0.312325	0.363212	0.324498	0.305887	0.656148	0.359564	0.433431	0.413633
YDR118W-A	YDR118W-A	32.3871	49.6655	41.1332	25.8691	41.9159	48.8599	37.5541	31.8907	1.8207	0.699565	0.294232	0.689378	1.48462	0.397988	2.24367	3.5431
YDR119W	VBA4	19.2806	21.295	24.4158	19.0411	22.0034	25.5624	21.5447	19.1489	1.04604	1.21711	1.08622	1.02491	1.68163	1.29591	1.77541	1.48869
YDR119W-A	COX26	1338.31	1361.32	1208.9	982.181	1109.06	751.603	1107.4	1163.87	1568.83	1578.87	1742.58	1834.32	3757.72	2710.12	3576.79	2979.98
YDR120C	TRM1	17.3445	16.4174	16.3523	23.6272	17.1081	18.2394	20.5406	21.3274	11.8099	23.3184	15.3814	22.5596	17.8056	15.0751	16.7965	14.2248
YDR121W	DPB4	43.5238	27.7436	28.9523	40.6816	32.0264	24.4967	40.8745	38.3985	43.8558	75.7086	55.1675	75.797	45.2693	43.3794	44.2099	42.7084
YDR122W	KIN1	45.5616	55.5614	57.2171	31.1532	50.9753	57.3246	38.2988	38.7143	23.9745	29.7061	27.6941	32.9791	30.4208	26.7521	30.2843	28.0606
YDR123C	INO2	29.1517	19.6749	20.2828	28.2515	24.7084	16.588	27.1308	26.5977	19.1675	29.9228	21.1461	31.4239	41.0502	34.8507	41.466	37.5783
YDR124W	YDR124W	22.2949	25.9153	24.3292	15.7462	23.2096	25.6808	19.5092	20.3894	2.44265	2.51193	2.68741	2.9459	2.70909	3.08419	2.96591	3.23712
YDR125C	ECM18	14.8718	14.052	14.5858	9.69078	14.3637	13.3324	12.1689	11.7527	1.50588	2.58032	2.07453	2.77644	2.77315	3.03784	2.93837	3.35528
YDR126W	SWF1	16.3356	19.7187	17.9309	16.0767	18.2478	16.3438	15.4787	17.2906	3.08091	5.14593	3.26982	5.9465	6.72357	6.60231	6.89881	7.96945
YDR127W	ARO1	30.8225	39.5844	43.9244	33.4255	38.0449	52.3487	30.5877	30.67	2.1719	1.96228	2.41366	2.4774	3.67031	1.92611	3.88086	2.06819
YDR128W	MTC5	12.088	13.1192	14.2938	9.84825	13.0425	14.8437	10.7513	10.2832	5.41826	10.0406	6.36483	11.2465	12.723	11.2036	11.3841	11.4639
YDR129C	SAC6	258.376	280.297	295.269	223.669	278.926	276.338	229.989	238.088	56.6771	51.4007	61.555	57.386	93.1132	71.7897	85.785	73.6611
YDR130C	FIN1	30.9421	23.4859	22.5742	32.6933	25.154	20.5168	26.7763	27.7737	8.5973	15.1694	9.90027	13.3527	11.7502	10.9962	12.019	10.8104
YDR131C	YDR131C	11.0997	10.9964	11.1749	8.90546	9.71491	9.15566	9.16977	7.68873	1.30261	2.26256	1.4433	1.85376	2.61287	2.19381	1.88594	2.13084
YDR132C	YDR132C	10.3954	9.88143	9.9968	9.48421	9.70115	8.44955	10.0171	9.32205	8.82863	18.7058	11.3867	19.562	28.0667	23.8786	24.9723	24.0101
YDR133C	YDR133C	829.671	769.896	662.895	693.089	624.321	420.572	684.522	794.111	382.066	281.967	356.751	319.73	733.564	405.784	657.626	447.347
YDR134C	YDR134C	710.735	656.025	567.26	619.758	523.378	314.358	573.67	592.119	355.536	270.454	363.423	315.515	752.095	429.256	664.337	425.448
YDR135C	YCF1	20.8797	23.7063	24.0623	20.4603	21.7026	27.1127	19.1202	18.943	2.4751	4.10527	2.85392	3.89803	4.82809	4.48379	4.94993	4.56522
YDR136C	VPS61	1.84853	0.913398	1.08454	0.815147	1.48108	1.67834	0.800083	1.0309	0.0986262	0.0814648	0.103561	0.0788428	0.128888	0.0813838	0.0830064	0.0780662
YDR137W	RGP1	19.4555	20.6032	21.7346	16.5752	19.0872	21.0132	17.4501	17.4045	0.671762	0.502984	0.713614	0.795089	0.817401	0.769136	1.06399	1.00653
YDR138W	HPR1	11.1654	10.147	11.1127	8.85647	10.0251	10.4012	8.45036	9.2475	0.598721	0.454893	0.548881	0.454815	0.881056	0.499102	0.653807	0.547657
YDR139C	RUB1	98.8202	112.256	130.991	89.3336	99.9343	158.272	97.542	83.7677	21.67	34.396	20.9222	35.6902	42.7105	46.3327	49.4704	58.3139
YDR140W	MTQ2	24.4107	30.8603	31.2572	26.7258	29.5067	36.6407	25.3962	26.2895	6.36568	11.3616	6.85269	10.9279	14.6333	14.3298	13.5543	15.2798
YDR141C	DOP1	13.6751	15.3737	17.7444	9.70556	15.2204	17.311	11.6608	11.1523	0.983523	1.56657	1.18426	1.69939	2.13827	1.97209	1.76089	1.92325
YDR142C	PEX7	23.3379	24.4073	25.3571	17.2966	23.4342	21.8608	21.8205	19.1574	8.5879	16.617	10.4365	16.7642	24.4513	22.15	20.7781	22.3249
YDR143C	SAN1	20.2152	22.4371	25.4582	16.8579	22.6498	23.2022	19.3053	18.6049	8.14306	13.6512	9.3557	14.5038	13.113	12.2798	12.9724	13.3478
YDR144C	MKC7	6.56678	5.98829	7.5435	8.6916	6.8125	9.10129	8.56569	6.01281	0.533396	0.986285	0.586385	0.942907	0.518609	0.723943	0.488645	0.541576
YDR145W	TAF12	26.9434	30.2654	37.9568	19.9423	32.7304	32.6036	23.6186	22.5809	7.7975	13.0287	9.39759	12.732	15.5622	14.875	15.8608	14.9006
YDR146C	SWI5	5.6152	4.82743	6.59435	6.24355	5.63485	6.04513	5.62116	4.99726	0.278315	0.153068	0.299614	0.164288	0.250363	0.12469	0.137631	0.159929
YDR147W	EKI1	20.805	17.1103	21.4427	15.4573	19.9407	17.9752	17.0331	16.0909	1.54781	2.74881	1.94783	2.59978	3.0131	2.93118	2.84127	2.70976
YDR148C	KGD2	124.316	177.121	188.927	108.771	161.569	180.95	119.947	120.343	111.761	128.535	129.391	143.755	175.365	143.614	173.021	156.541
YDR149C	YDR149C	3.42442	2.60416	2.66586	2.42569	1.82684	0.864259	2.35158	3.85481	12.2578	13.2349	13.0927	15.8112	16.0268	14.1986	17.5973	15.7362
YDR150W	NUM1	14.8249	18.2686	18.3655	11.9407	17.1455	17.606	12.6688	13.5437	26.7993	39.006	32.2936	41.5387	54.8138	44.8494	50.2107	46.4259
YDR151C	CTH1	18.0439	13.0489	16.5386	34.6101	16.0631	15.2703	18.3298	18.5903	93.4472	87.7994	101.571	95.409	52.0819	44.7965	53.3555	49.2309
YDR152W	GIR2	54.1462	56.6146	55.489	64.5796	55.1978	62.2699	57.2027	58.5921	85.2652	99.3417	104.701	100.961	42.7741	50.077	46.3113	50.6325
YDR153C	ENT5	80.3568	61.6195	64.2141	78.3908	65.5949	57.1757	65.0876	71.4331	86.5845	94.177	102.62	90.3217	42.9602	46.0729	47.1825	45.6355
YDR154C	YDR154C	1541.05	1672.74	1585.78	1510	1571.77	1742.23	1306.63	1451.49	1056.53	1174.72	1180.83	1277.87	1108.91	1037.12	1134.08	1134.42
YDR155C	CPR1	1790.82	1886.57	1878.96	1760.61	1782.86	1825.17	1496.49	1689.06	1442.4	1451.06	1554.5	1543.41	1390.27	1305.74	1437.98	1389.23
YDR156W	RPA14	124.482	121.318	101.181	152.434	131.87	105.872	115.454	140.015	250.901	302.635	291.572	296.185	212.469	197.693	208.212	206.724
YDR157W	YDR157W	9.58525	11.4772	7.78001	10.8921	11.1955	12.0509	8.58677	9.44658	12.1693	22.4663	13.1911	25.4316	14.8512	11.8502	11.6193	11.7748
YDR158W	HOM2	120.55	104.225	117.703	140.265	114.887	106.845	125.28	112.57	18.4889	22.8723	22.9001	22.2632	12.176	10.4844	12.9988	9.1652
YDR159W	SAC3	13.3243	14.3585	14.6947	11.5405	14.1839	15.2274	11.6925	11.7863	2.07005	4.17013	2.66249	3.97535	4.84833	4.24409	4.07423	4.06295
YDR160W	SSY1	14.0153	16.9145	16.6105	11.9108	15.5923	17.4074	12.9665	12.913	4.17763	7.58205	4.58365	7.48513	9.86501	9.14262	8.41513	8.59911
YDR161W	YDR161W	19.6519	17.2205	17.0858	25.804	19.4278	22.8627	24.2496	23.6279	4.07856	8.15189	4.48178	6.76472	8.06801	6.17362	6.9583	6.62958
YDR162C	NBP2	31.7486	28.8642	28.6436	24.3574	28.8519	31.7518	27.7584	28.2463	4.36629	4.51347	5.4098	5.10344	5.10849	4.62912	5.11648	5.37522
YDR163W	CWC15	34.5899	41.3348	36.8886	32.9316	38.3699	41.1181	33.8026	34.5105	15.0439	27.664	17.4256	26.3825	31.0777	30.9702	29.758	30.3237
YDR164C	SEC1	15.587	15.6793	18.5673	12.4023	15.7171	16.8864	13.6781	13.1666	0.975486	1.36344	1.23436	1.30096	1.40738	1.38138	1.37911	1.47737
YDR165W	TRM82	17.7353	19.4923	19.3461	23.5063	18.8677	26.738	23.85	23.4092	0.5364	0.827591	0.707503	0.523961	0.795582	0.546079	0.867186	0.605856
YDR166C	SEC5	17.857	18.751	19.6373	14.3104	17.9699	18.3778	15.075	15.0966	1.50727	2.91064	1.94065	3.2513	3.26423	3.13712	2.81355	3.50905
YDR167W	TAF10	45.5053	51.492	48.5498	48.5601	49.4934	51.7623	46.3397	44.2299	20.463	39.5771	22.2262	43.1361	33.5314	35.2094	32.908	35.1543
YDR168W	CDC37	69.6891	75.9995	83.3313	51.767	75.4013	78.1147	54.6417	63.2392	14.3325	24.5816	18.8977	28.6893	23.3427	23.6318	20.3864	23.5156
YDR169C	STB3	64.2901	60.9708	60.1171	49.9699	58.5337	51.0304	51.1904	54.4963	60.7188	122.808	71.085	122.969	140.818	123.429	130.262	124.118
YDR169C-A	YDR169C-A	26.4205	13.9716	27.7293	10.5844	12.9161	12.6789	25.6098	14.9697	18.3395	23.7796	17.1845	36.7722	24.6501	34.6134	31.3706	32.6998
YDR170C	SEC7	16.8233	19.8622	20.9116	17.9576	19.0761	24.9839	16.7897	16.6542	3.67371	4.37019	4.05001	4.20751	4.96947	3.82405	4.47381	3.53989
YDR170W-A	YDR170W-A	1.86806	1.95582	2.73187	1.56624	1.95907	2.08055	1.49278	2.07607	0.155358	0.19606	0.209552	0.289443	0.376303	0.203826	0.466969	0.401086
YDR171W	HSP42	814.451	481.071	419.68	1393.76	507.777	354.322	876.059	927.419	4814.97	3633.42	4668.4	3646.81	3806.64	2736.08	3773.39	2767.09
YDR172W	SUP35	53.2094	60.756	67.8478	56.8163	59.3412	75.2913	50.1872	52.7182	18.1525	19.004	19.8834	17.6585	15.4443	13.4286	15.9388	12.3613
YDR173C	ARG82	26.8141	22.982	19.9422	20.8567	20.559	15.075	18.0848	23.1402	16.3379	19.1959	15.8117	18.6977	12.8133	13.7996	12.1387	13.1421
YDR174W	HMO1	267.071	338.153	318.781	242.083	302.268	340.879	222.314	269.863	51.9764	61.1562	58.0303	58.2004	49.6481	43.4145	51.3451	41.8347
YDR175C	RSM24	70.235	76.2928	73.8575	68.476	71.8634	69.4319	59.8395	69.2412	30.3043	35.9752	35.0146	36.5235	25.636	24.7098	26.5379	23.906
YDR176W	NGG1	25.5329	20.575	21.9911	25.5207	21.2019	17.6176	21.0278	21.6816	3.45139	4.84787	4.27603	5.48002	3.96771	4.4619	3.87793	4.21133
YDR177W	UBC1	149.056	167.512	167.588	129.745	166.041	148.873	130.455	144.741	26.8895	43.5462	31.5845	40.4996	39.9038	41.1245	37.657	43.691
YDR178W	SDH4	338.118	534.206	574.787	217.312	458.993	514.874	285.079	314.111	237.373	279.022	264.5	297.647	416.023	378.111	364.662	386.451
YDR179C	CSN9	15.2659	11.134	12.1668	12.2555	9.94572	8.23096	11.2107	14.7906	1.07658	3.06821	2.08633	2.57522	2.53769	1.79845	1.82768	2.0208
YDR179W-A	YDR179W-A	4.84553	2.96598	3.6804	4.70132	3.85465	3.49124	4.33772	3.96478	0.326438	0.598726	0.663134	0.749478	0.930432	0.734089	0.716612	0.667386
YDR180W	SCC2	2.43128	2.23733	2.35687	2.36604	2.1225	2.65744	2.21141	1.9918	0.126575	0.166565	0.162239	0.104738	0.195424	0.154769	0.219186	0.108977
YDR181C	SAS4	11.6975	12.9026	12.2024	9.26343	11.4461	14.1654	10.3158	9.99867	2.09471	3.05019	2.74855	3.28733	3.18106	3.6425	3.73546	3.98205
YDR182W	CDC1	27.0902	31.4061	36.0422	20.8455	31.0501	33.3003	26.8242	22.7892	4.29699	8.25377	6.04512	9.05815	9.27142	8.44076	9.26016	9.11369
YDR182W-A	YDR182W-A	13.113	17.8605	15.9022	9.34497	18.1783	21.1607	11.7829	10.983	0.604234	1.19117	1.05148	1.16804	1.76843	1.2565	2.74635	2.43969
YDR183C-A	YDR183C-A	9.18843	6.8768	8.54274	5.5362	5.58425	10.5691	12.331	12.7557	0.124951	0.150089	0.392513	0.438657	0.319617	0.781951	0.465969	0.301555
YDR183W	PLP1	12.147	10.8388	11.9652	12.852	10.9471	11.4376	13.3008	11.8389	1.16706	1.41889	0.772635	1.00658	0.863764	1.28339	1.21861	0.9619
YDR184C	ATC1	5.55935	5.92645	6.77474	6.76152	5.81756	6.80775	5.78176	5.90804	2.24773	2.80161	3.1221	2.32829	2.92527	3.42857	3.3843	3.60191
YDR185C	UPS3	20.3096	20.6083	18.3744	16.3568	20.151	17.129	21.233	20.8731	29.0522	34.3609	30.7668	35.4477	33.4537	29.7921	34.9018	31.9332
YDR186C	YDR186C	29.2263	27.1889	31.1893	22.6622	27.6049	26.2507	23.6831	23.351	71.2091	66.9599	79.2987	74.1418	70.3604	64.414	71.066	70.818
YDR187C	YDR187C	11.475	15.4104	15.0518	10.9109	14.8	19.2851	8.72464	10.643	7.15051	7.36054	7.34979	8.82756	5.54108	6.81316	6.1295	7.45214
YDR188W	CCT6	76.8887	95.5668	92.8794	77.1504	85.5728	116.742	65.8888	74.9433	27.879	38.8132	36.1358	40.2493	25.2312	25.512	26.8352	28.2634
YDR189W	SLY1	31.0981	31.0941	33.5433	26.4059	32.6088	28.6361	26.0055	26.4927	3.13161	3.76757	3.23749	3.80653	3.98086	3.85344	4.29033	4.13472
YDR190C	RVB1	35.3009	33.5809	36.1708	36.5995	35.3853	39.8616	35.6387	34.2004	3.36231	5.03474	4.48187	4.33908	4.45176	3.31007	4.74067	2.9519
YDR191W	HST4	10.33	6.99133	7.23584	11.6996	7.18689	6.23499	7.95354	8.70457	2.22686	2.55212	2.44321	2.70491	2.22261	1.4887	2.35517	1.48099
YDR192C	NUP42	13.2736	12.1502	15.5779	9.76126	13.6606	11.8307	12.5568	11.6754	3.69099	6.30611	4.52784	6.34095	5.9685	5.9279	6.00968	5.93761
YDR193W	YDR193W	8.21904	6.65728	8.47045	6.22538	7.20819	5.30866	5.17661	7.24435	1.89512	1.88059	1.61678	2.14716	3.0842	2.76452	2.7353	2.583
YDR194C	MSS116	44.093	44.9429	50.5071	47.3865	46.1575	59.2856	39.9195	40.8545	33.1466	46.6644	42.0877	49.0031	28.1397	29.429	28.6714	28.4801
YDR194W-A	YDR194W-A	3.19071	2.14746	1.30484	0	1.3043	0	0	1.72463	2.93537	3.45686	1.15252	3.40332	0.455473	2.31374	0.910983	0
YDR195W	REF2	25.2651	23.8387	25.0662	23.2561	24.2469	19.7322	19.9533	23.6479	8.02457	11.9015	9.63263	10.8363	10.3784	8.90309	10.6241	8.08063
YDR196C	CAB5	75.4317	94.0501	95.419	56.1678	85.5278	86.3929	63.4566	68.9475	5.03662	6.47131	5.79094	5.57035	8.31825	8.44766	7.15219	7.23668
YDR197W	CBS2	29.1347	29.6071	31.8855	26.4317	29.453	26.9431	24.9522	25.0962	1.72799	2.02584	2.51377	2.32706	2.81308	2.6439	2.8441	2.11812
YDR198C	RKM2	7.13742	7.52983	7.3485	6.90739	7.32004	7.69753	6.50936	6.37713	0.356001	0.353597	0.407075	0.265741	0.64747	0.616379	0.490682	0.469241
YDR199W	YDR199W	37.2076	65.5683	58.5615	29.7553	45.5991	80.1268	34.7075	38.4685	7.54572	16.3525	8.70311	19.2414	13.9448	18.6402	15.3391	19.705
YDR200C	VPS64	16.1538	18.2444	20.6097	12.317	18.2861	20.4778	14.9461	13.8734	3.26219	6.78361	4.21685	7.49634	6.95941	7.44175	6.89271	7.55587
YDR201W	SPC19	27.5385	30.8766	31.7349	24.1633	29.2647	34.0295	27.7811	27.0411	10.1922	17.8702	12.1378	16.9675	10.93	11.1984	12.0947	12.8014
YDR202C	RAV2	63.1498	58.0239	59.7679	50.3949	58.1576	42.3673	51.2765	54.2832	30.9119	40.6514	38.3726	44.8589	27.3891	29.3462	27.7149	30.9633
YDR203W	YDR203W	38.0467	26.4412	36.4185	30.7304	32.9533	17.1936	31.502	32.6808	20.7535	25.2644	28.2816	22.093	20.893	16.8257	19.6734	18.3125
YDR204W	COQ4	91.6327	127.457	124.407	72.3705	111.84	114.228	74.4243	89.1589	58.9208	55.9553	63.5143	63.7503	44.9622	48.1753	46.4771	54.6003
YDR205W	MSC2	22.3996	23.1052	24.1339	16.6768	22.6306	20.713	19.4784	19.0421	6.45015	13.9004	7.60837	14.0456	11.7485	12.6518	10.6629	12.2802
YDR206W	EBS1	22.1606	20.1514	21.3815	20.4476	21.502	21.1652	19.6309	20.4715	5.20521	8.43792	5.8419	8.62311	8.38393	7.30773	7.94121	7.6739
YDR207C	UME6	18.3488	19.9209	20.3769	17.4094	18.7875	17.7639	16.3295	16.182	42.7004	70.2671	50.7719	72.2599	48.0567	47.2849	46.2941	47.7537
YDR208W	MSS4	46.7031	40.2153	43.4574	40.5513	39.6959	32.9817	37.9215	39.1316	40.4149	69.2382	50.0577	73.3057	54.8543	55.4236	52.0652	56.7491
YDR209C	YDR209C	173.537	117.587	128.748	146.616	130.159	125.746	139.636	143.27	11.6586	11.8124	12.2334	10.3335	16.7518	12.8277	15.1315	10.3843
YDR210C-C	YDR210C-C	5.85496	9.14123	9.46463	5.64564	7.80432	12.8955	8.45463	6.01311	0.0552007	0.378797	0.34901	0.477349	0.113257	0.793976	1.2212	1.15062
YDR210C-D	YDR210C-D	7.5021	8.17002	7.70176	7.69838	7.03399	8.4601	6.4715	7.75984	0.76205	0.763288	0.886462	1.01945	1.06388	0.737506	0.994006	0.860236
YDR210W	YDR210W	0	0	0	0	0	0	0	0	0	0	0	0.279296	0	0	0.00408024	0
YDR210W-A	YDR210W-A	0	0	0	0	0	0	0	0	0	0	0	0	0	0	0	0
YDR210W-B	YDR210W-B	0.171277	0.23919	0.1146	0.122353	0.0331536	0.103776	0.0655945	0.148961	0	0.0144035	2.21611e-08	0.0163946	0	0.00503482	0.0317504	0
YDR211W	GCD6	18.3232	16.7356	18.4165	20.0995	17.9289	24.3442	19.3314	16.6942	6.39228	9.77715	7.66209	9.03556	8.31334	7.17406	7.68073	6.67833
YDR212W	TCP1	47.8964	51.5624	54.1805	57.2612	54.0299	62.5591	52.8518	47.86	4.81827	7.97123	6.8866	7.18995	5.33386	5.63529	5.84736	5.49258
YDR213W	UPC2	7.07618	7.17478	8.72307	6.33711	7.50343	10.6768	5.71651	5.34542	9.67049	14.8084	10.2231	13.2375	9.98989	10.3592	10.3815	10.6612
YDR214W	AHA1	140.903	163.026	138.932	167.422	145	163.514	121.349	150.307	331.68	371.146	323.852	366.476	268.874	257.417	286.351	251.607
YDR215C	YDR215C	9.85915	10.6973	8.39878	11.2206	8.7578	11.0205	8.26559	9.76254	27.5078	22.173	24.0722	21.3069	16.0538	16.5691	17.4974	18.4609
YDR216W	ADR1	60.6648	44.1487	44.0992	71.1964	41.8724	23.6707	57.6449	55.4807	91.8301	122.95	116.817	149.213	185.079	145.093	161.674	152.988
YDR217C	RAD9	2.02729	2.43501	2.79945	2.08289	2.5136	3.25334	2.18322	2.16151	0.633692	1.26128	0.718119	1.19659	1.65716	1.38978	1.51697	1.44982
YDR218C	SPR28	2.73216	2.99152	3.97247	2.12984	2.89456	2.82838	2.07954	2.21921	0.422243	2.00549	0.646456	1.93808	1.68162	2.44283	1.40544	2.56224
YDR219C	MFB1	24.7252	23.3951	22.8603	22.4361	21.9799	20.6163	21.9617	21.0854	11.9327	21.3276	13.4711	22.7545	27.5493	24.1726	25.3021	22.9888
YDR220C	YDR220C	8.15882	6.12171	6.29689	2.99499	7.27428	2.36718	5.92568	5.82519	0.584043	2.70595	1.12433	2.06765	2.0044	4.26739	2.31389	2.2237
YDR221W	GTB1	16.8288	22.4656	24.4208	14.4497	22.1405	25.9424	15.0947	16.7345	3.60235	4.92523	4.29045	4.84899	4.48288	4.47871	4.26051	4.53465
YDR222W	YDR222W	16.9222	16.0312	15.3246	16.9974	14.3555	14.1081	13.7416	14.5039	2.89807	2.51219	3.01902	2.68101	3.82686	3.16336	3.31049	2.83769
YDR223W	CRF1	15.3227	12.346	14.9308	10.7297	13.1683	11.3789	11.4082	12.8002	2.75856	3.66544	3.20423	3.94553	4.96154	5.60397	5.07683	5.96067
YDR224C	HTB1	1484.68	968.473	1176.83	1121.02	1070.48	899.749	1511.96	1197.93	51.3357	65.7424	67.7324	73.0094	116.402	103.494	101.947	114.509
YDR225W	HTA1	1746.74	1101.15	1306.7	1229.81	1232.76	828.555	1789.16	1424.28	53.8237	40.5368	61.2873	47.7037	98.1328	91.535	102.116	107.957
YDR226W	ADK1	330.106	333.693	370.242	390.412	347.168	341.606	363.631	328.725	10.2358	9.18078	11.9205	10.6394	8.21278	6.56364	7.96309	9.29526
YDR227W	SIR4	6.00617	5.72482	6.11721	5.14855	5.76361	5.70316	4.69327	4.93594	3.95558	7.5998	4.89153	7.48773	8.6215	7.29137	7.58483	7.39718
YDR228C	PCF11	19.8726	20.0843	22.4691	16.9513	20.1353	17.5209	16.7699	18.2927	1.32174	1.94716	1.51152	1.85283	1.53571	1.2287	1.62542	1.4567
YDR229W	IVY1	33.3923	32.7766	34.0404	31.3352	32.9507	28.1002	30.9737	31.5854	3.98222	4.86774	4.37175	5.00028	4.73929	4.62518	4.94436	5.46055
YDR230W	YDR230W	101.859	161.225	147.407	72.2899	133.192	161.121	75.7306	105.3	122.296	143.953	128.745	167.925	126.988	147.859	134.235	155.737
YDR231C	COX20	67.7057	97.0469	98.836	46.4649	89.9218	84.1367	56.0189	64.8424	86.1127	99.787	98.105	113.859	94.1722	105.579	93.2837	112.497
YDR232W	HEM1	72.6489	89.858	95.9115	57.1308	82.424	85.7695	63.3592	63.8524	142.578	152.036	159.266	166.303	135.495	124.987	134.942	136.725
YDR233C	RTN1	235.168	219.988	256.866	225.466	233.57	244.255	230.085	222.038	21.7732	36.1781	23.9012	30.566	34.2296	41.0384	32.2278	36.6117
YDR234W	LYS4	17.6246	12.0823	13.8362	19.0281	13.7039	11.0067	17.5763	15.116	9.49823	11.2965	10.8445	10.4407	8.19377	6.96223	7.87399	6.35301
YDR235W	PRP42	23.5019	21.6525	23.5106	19.7102	20.5194	19.4807	19.3711	21.4461	1.153	3.04504	1.75537	2.96393	2.8441	2.96004	2.18518	2.35452
YDR236C	FMN1	47.4454	56.3051	58.2954	38.1476	52.6912	59.2801	40.2189	43.6419	5.61121	8.89581	6.00625	9.81807	6.73721	7.02921	5.81717	7.58796
YDR237W	MRPL7	67.2817	88.9267	85.6429	68.3022	84.1013	95.0555	61.7996	66.445	11.5208	17.6275	12.5347	18.3536	14.1591	15.9286	14.8835	15.3273
YDR238C	SEC26	65.6376	69.1323	77.6496	60.509	72.1851	77.573	56.7298	57.8122	6.54789	7.63368	7.49158	7.71822	8.03128	7.50319	7.71734	7.35009
YDR239C	YDR239C	9.04923	9.54949	10.1728	8.96821	9.96603	9.43347	8.92105	8.30365	2.75949	3.83039	2.95101	3.76589	5.60938	5.73184	5.3495	5.78563
YDR240C	SNU56	8.18397	7.28993	7.29531	7.47271	7.46389	6.75228	7.41508	7.64616	1.57466	2.66874	1.93215	2.61547	2.72696	2.71577	2.34192	2.45588
YDR241W	BUD26	6.05206	8.68073	7.10257	7.30601	7.17649	8.78407	6.15729	6.38167	0.809932	2.81036	0.955281	2.38538	1.17159	2.65969	1.64513	1.09521
YDR242W	AMD2	10.0259	11.0417	10.8765	7.9323	10.4758	12.8663	9.17185	9.06193	6.57839	8.79558	7.29038	8.71512	12.551	12.0063	12.1816	11.6531
YDR243C	PRP28	7.47936	6.28343	6.82478	7.22276	6.33728	5.72774	7.44917	6.40907	16.6585	25.9852	21.6542	28.6803	22.9192	20.4328	21.3057	22.4013
YDR244W	PEX5	42.84	39.584	41.3799	36.89	40.1333	33.2659	38.5092	36.4669	94.4088	143.987	117.142	155.191	174.35	145.948	157.151	146.889
YDR245W	MNN10	48.1065	44.1473	47.8332	54.3938	46.6355	41.789	49.3916	47.7353	14.3171	15.1955	16.2842	15.9548	11.2233	11.2883	13.0547	11.3795
YDR246W	TRS23	83.5627	84.0664	86.2608	85.6857	86.4525	85.3758	79.8491	79.142	23.9053	27.2998	26.096	28.5281	31.4628	37.5365	34.4857	42.9373
YDR246W-A	YDR246W-A	64.7668	84.8485	90.4207	54.3757	77.7218	81.5585	50.8724	70.3457	28.4751	28.7291	32.5432	32.4893	20.5724	28.9991	31.9173	34.2439
YDR247W	VHS1	283.68	205.544	177.811	280.912	185.956	136.096	247.293	240.998	119.19	153.054	135.934	154.45	239.892	193.578	224.766	195.827
YDR248C	YDR248C	57.1814	51.4331	52.7453	51.5844	51.4357	41.9	52.4679	54.1223	35.9583	35.9541	44.0709	38.4218	28.5869	32.7917	33.5872	37.9142
YDR249C	YDR249C	12.7641	11.8934	12.2758	16.5189	11.6731	12.1556	13.0774	13.8325	8.54419	14.9425	10.9568	16.2119	11.5408	12.1738	10.0743	12.6587
YDR250C	YDR250C	15.9353	15.6089	14.5894	10.2577	14.3212	11.2108	11.9272	12.9595	7.3529	12.4226	10.0095	10.1843	13.8103	11.3789	10.0117	12.8272
YDR251W	PAM1	58.3002	63.2585	72.9693	47.3818	63.4106	58.0986	53.3994	50.6944	27.135	38.5243	32.1353	38.2918	44.3069	38.3823	38.6373	37.0678
YDR252W	BTT1	18.7863	15.6944	19.9739	10.9282	18.1746	13.5449	13.2995	10.2303	3.95126	7.1862	5.18363	6.56903	4.34759	4.44252	5.1549	5.26801
YDR253C	MET32	50.2627	50.6773	68.8343	28.2697	59.4836	81.2375	39.0698	28.3924	70.1322	151.316	81.4863	148.837	135.968	127.628	130.039	124.874
YDR254W	CHL4	30.7232	37.9	36.1606	18.4586	32.1906	39.1905	25.3331	26.5839	12.2721	20.3876	13.9017	21.4444	21.8239	21.1215	19.2953	19.7771
YDR255C	RMD5	44.4515	49.8637	56.6701	29.0979	50.4998	48.3877	37.7738	34.1233	32.5084	59.5216	40.1972	64.6417	68.4923	62.5821	60.4874	64.4361
YDR256C	CTA1	35.6371	35.5911	33.9271	28.2315	31.5633	23.3114	34.454	27.3276	314.27	378.977	383.34	478.148	579.666	565.501	516.352	622.437
YDR257C	RKM4	19.3921	17.1918	20.0577	22.2533	18.6126	20.0933	19.1617	18.7953	8.23185	9.41207	9.86115	8.64198	8.42317	7.82481	8.24909	6.73772
YDR258C	HSP78	174.936	90.048	86.2979	443.693	98.7617	73.1661	227.702	216.776	1638.96	1456.69	1718.68	1468.33	1281.5	1017.16	1253.24	994.675
YDR259C	YAP6	19.8144	22.0179	32.0528	16.4343	26.11	36.5966	24.2024	15.4204	10.5035	11.0573	10.0398	10.4582	10.2119	10.0056	10.9501	9.63475
YDR260C	SWM1	19.0018	23.0454	25.692	19.8928	22.2909	29.0421	17.9636	18.3003	22.4037	24.7852	23.3584	22.5659	25.0071	26.4857	27.1414	26.324
YDR261C	EXG2	22.2927	28.5675	30.7242	21.8171	28.8816	36.8225	20.867	20.4634	1.07704	0.942578	1.12257	1.17537	1.06048	0.933638	0.942915	0.887635
YDR261C-C	YDR261C-C	0	0	0	2.65111e-10	0	0	0	0	0	0.041862	0.000118679	0.000135548	0.00014863	0.177902	4.81468e-10	0.0194297
YDR261C-D	YDR261C-D	0	0	0	0	0	0	0	0	0	0	0	0	0	0	0	0
YDR261W-A	YDR261W-A	0	0	0.0349761	0	0	0	0.0598004	0	0	0	0	0	0	0	0	0
YDR261W-B	YDR261W-B	0.0254028	0.0125335	0	0.0123787	0.0440639	0	0	0	0	0	0	0	0	0	0	0
YDR262W	YDR262W	70.7978	56.7395	55.1043	63.2557	51.7262	36.4756	58.0556	64.6992	414.414	411.261	429.523	429.743	356.743	329.411	328.992	330.238
YDR263C	DIN7	8.69957	9.00737	8.87278	6.89357	7.56721	6.99123	5.89437	7.42079	3.14914	3.38893	3.19685	3.13195	3.30069	2.76019	2.50364	2.7936
YDR264C	AKR1	29.8915	32.5469	35.6827	21.6403	31.807	31.802	24.3727	25.9058	19.104	30.1909	21.9851	33.6336	18.2226	20.4993	18.2192	21.3651
YDR265W	PEX10	37.6263	38.0844	39.0607	31.0397	36.5136	30.0471	31.3251	33.0995	11.5242	23.8315	12.851	23.5502	22.9738	23.9737	20.8225	22.2982
YDR266C	HEL2	24.5787	22.2582	24.37	22.3417	22.1228	24.316	22.3548	20.4566	3.7097	5.82611	4.40967	5.17759	4.76511	4.0694	4.52702	4.79212
YDR267C	CIA1	29.5129	35.747	33.7958	29.8798	35.5371	36.2165	30.7626	32.7389	2.29249	2.71937	2.2896	2.74567	3.05312	2.89738	2.75831	2.13619
YDR268W	MSW1	20.0812	22.4379	22.9224	17.9106	22.6309	24.7067	16.6429	18.1598	3.74079	6.00728	4.36205	5.34297	4.32228	4.79567	4.47564	4.2058
YDR269C	YDR269C	9.5226	7.01287	8.58545	4.86764	6.80467	4.64104	7.69756	6.94428	10.8493	18.6705	12.7132	23.3971	27.6998	29.2549	30.7661	31.7376
YDR270W	CCC2	8.47094	8.80577	10.9724	7.04166	10.0042	8.06573	7.80724	7.97001	7.72059	17.7548	10.3955	20.0257	22.9877	24.2699	22.3847	26.9982
YDR271C	YDR271C	11.6891	20.3472	14.2097	9.41266	14.5367	20.6181	11.4702	10.7645	7.59344	23.4867	9.54818	19.8064	20.4212	23.6954	20.3122	28.4192
YDR272W	GLO2	117.6	149.629	146.814	84.125	138.969	147.286	92.9518	106.428	69.4349	91.2541	77.8082	96.792	90.7496	100.098	91.0316	106.813
YDR273W	DON1	37.1101	63.1442	46.1528	27.9022	47.8181	50.936	25.7841	35.2127	57.6723	36.4277	48.9298	38.1136	30.393	31.3301	28.7533	32.1797
YDR274C	YDR274C	13.5163	15.1211	14.2951	10.3963	15.381	10.661	10.537	12.4362	16.7898	52.4505	19.0484	56.1085	35.3203	101.308	40.8473	117.37
YDR275W	BSC2	45.9847	48.692	48.1872	47.9539	46.4569	43.3524	46.9239	44.8923	127.721	159.177	153.973	183.016	185.501	163.75	177.106	173.613
YDR276C	PMP3	4160.56	4331.49	4850.88	3200.74	4121.37	3679.75	3653.86	3753.9	4048.28	6244.81	4717.19	6787.96	6515.63	7609.2	6292.35	8530.93
YDR277C	MTH1	116.445	115.279	104.343	129.374	93.3435	118.26	85.9643	106.997	350.586	287.15	365.399	304.547	445.299	291.89	430.441	317.887
YDR278C	YDR278C	2.14435	1.81421	1.86835	2.20848	1.57804	1.46693	2.63643	3.39559	6.07311	7.16432	5.92544	5.78785	7.61537	6.01065	8.24193	4.04705
YDR279W	RNH202	11.3013	10.805	12.0048	10.9315	11.7095	10.7153	12.1831	11.4339	2.85944	6.18076	3.47836	6.5374	5.12084	5.5289	4.99095	5.54545
YDR280W	RRP45	32.8355	28.0804	27.8413	32.7044	29.2715	24.282	33.1709	30.8448	10.1936	16.1641	11.9392	15.5853	12.5411	11.1405	11.6172	10.3276
YDR281C	PHM6	11.2943	11.5985	12.993	6.2097	10.1117	7.60927	8.32847	10.6487	3.86017	6.76541	5.12841	7.10277	13.9413	13.3064	10.0987	12.0501
YDR282C	YDR282C	11.7108	15.8474	14.535	8.75218	13.2364	16.3272	9.65409	9.78508	4.31593	6.02743	4.97642	6.46721	11.1872	11.6719	10.7107	10.0545
YDR283C	GCN2	10.6348	13.4097	13.1028	8.58317	11.7382	15.0711	8.44123	9.57204	1.59695	2.03529	1.84721	1.89495	2.5443	2.17913	2.33356	2.10682
YDR284C	DPP1	204.157	197.655	184.362	187.61	182.709	144.944	166.132	180.991	17.9297	42.1582	24.3144	43.0733	24.2478	34.1134	26.9794	33.114
YDR285W	ZIP1	4.56129	4.35784	4.38228	3.91479	3.95607	4.10571	3.5414	3.89727	1.80825	4.06497	2.54903	4.48988	1.76222	2.69683	1.81151	2.90696
YDR286C	YDR286C	32.4984	46.2852	51.4393	30.2892	42.7892	54.8515	33.2468	31.7675	14.9486	33.954	17.9124	35.2632	43.2017	44.7175	36.0072	45.6857
YDR287W	INM2	36.1969	45.2429	42.8044	29.1895	39.4862	43.7652	30.9299	31.7617	14.949	22.2269	14.9747	24.652	36.2581	35.799	30.2411	38.9828
YDR288W	NSE3	39.7975	50.269	46.7679	30.6946	44.1444	44.6022	35.7961	39.0249	7.10713	8.79403	7.52216	9.92676	15.2264	13.4552	11.9372	14.6013
YDR289C	RTT103	21.2572	19.5305	21.065	20.1783	18.105	19.5616	20.8198	19.2931	4.86305	7.62632	5.22555	8.08589	7.76481	8.37095	7.03938	8.53277
YDR290W	YDR290W	2.51113	1.81234	2.02243	2.68303	2.19635	0.565461	2.24162	2.66308	0.41281	0.804337	0.862808	0.573667	1.74208	0.6113	1.15884	0.515925
YDR291W	HRQ1	8.17368	8.69674	9.24394	7.74133	8.26029	10.4733	8.20698	6.99282	1.7636	3.71514	2.37855	3.92469	5.10785	4.77208	4.71892	4.38199
YDR292C	SRP101	35.0229	41.0671	47.3452	32.8539	44.4776	51.7683	36.009	33.2609	2.83939	3.83039	2.90961	3.94706	4.09001	4.12236	3.98512	4.17774
YDR293C	SSD1	78.2465	91.2526	101.255	56.0873	90.9359	92.7265	65.6769	65.4864	46.5857	71.6854	51.7855	76.8925	95.6582	91.4177	96.725	98.7872
YDR294C	DPL1	51.9419	60.0159	60.7035	51.8421	55.5888	58.079	45.8676	51.7469	6.30176	8.3264	6.84053	9.47188	13.8353	15.8103	12.9133	17.0291
YDR295C	HDA2	21.3649	18.5587	19.4979	18.5572	19.4736	19.135	18.0733	16.6663	2.57475	3.27885	2.86404	2.95042	3.23052	2.67035	2.96264	2.33209
YDR296W	MHR1	70.8646	102.161	101.448	61.9031	90.4574	109.457	65.5757	64.8196	41.8286	58.4235	48.3413	61.6074	53.9121	53.0941	54.5734	56.1214
YDR297W	SUR2	79.1596	67.0286	76.8953	71.4252	69.9017	61.7423	73.8092	54.5799	80.0044	49.8582	86.3346	59.0175	97.3674	61.5456	93.6591	68.5563
YDR298C	ATP5	236.801	324.779	341.336	198.033	293.125	332.601	230.155	234.509	68.8595	68.6938	87.773	84.8754	92.4922	82.3367	91.7544	93.6576
YDR299W	BFR2	8.34093	6.8213	6.6198	14.2231	7.74698	7.32083	12.0885	12.0257	1.82586	2.70242	2.38609	2.29722	2.62273	1.64737	2.58297	1.02708
YDR300C	PRO1	13.8067	12.5937	15.3295	16.884	14.6802	16.8898	17.133	15.9073	1.64253	2.08289	2.52616	1.8547	2.19135	1.73807	2.29096	1.34814
YDR301W	CFT1	15.9759	17.345	18.6069	14.4069	16.2246	18.53	13.6637	14.7623	2.61862	4.47012	3.16079	4.67619	4.87832	4.11133	4.15843	3.78369
YDR302W	GPI11	29.0653	28.565	28.8196	24.913	29.3593	23.93	30.0418	26.4088	1.46193	2.18533	1.96146	3.18786	3.43682	3.91075	3.4212	3.59415
YDR303C	RSC3	21.628	17.9374	20.0161	16.9198	18.3293	16.5646	17.8834	18.363	2.58877	6.38285	3.12542	6.62469	2.62211	2.84755	2.29814	2.97894
YDR304C	CPR5	190.731	217.088	214.319	169.85	205.99	205.759	163.723	183.033	32.3591	48.088	34.9663	44.6072	40.2426	42.1605	36.9697	37.0469
YDR305C	HNT2	46.3689	51.8762	46.7767	39.4447	46.6406	51.1039	37.1958	44.304	5.01549	8.50769	5.69796	8.36346	9.39658	9.10364	9.1777	8.70738
YDR306C	YDR306C	55.1211	55.7104	49.0236	39.6082	49.5714	42.0941	40.4041	46.7703	48.793	111.921	56.2761	112.229	113.105	111.534	102.103	108.59
YDR307W	PMT7	15.8651	18.5656	19.7383	12.7067	17.803	19.0875	15.095	14.0092	1.19215	1.36487	1.08371	1.42466	1.36779	1.08394	1.34376	1.09436
YDR308C	SRB7	32.7595	29.4774	32.3406	30.7584	32.1903	35.8567	33.2181	29.0853	1.50456	0.765429	1.96014	0.680174	1.07918	0.709944	0.848571	1.23763
YDR309C	GIC2	9.38266	9.15329	10.1258	9.83125	9.16007	10.0915	7.9377	8.35445	3.30264	2.18103	3.95336	2.5982	2.75758	1.92798	3.05026	1.9653
YDR310C	SUM1	16.162	20.7938	22.4189	14.3686	19.5502	25.815	15.1766	14.5703	3.70759	6.30239	4.12368	6.73811	8.54285	8.74273	8.63392	8.67157
YDR311W	TFB1	24.2872	23.4366	25.8798	17.2972	24.2772	23.1649	20.3635	19.1513	1.921	2.6046	2.64659	2.72657	3.48589	3.22401	3.7852	3.38631
YDR312W	SSF2	9.33365	8.8219	10.3702	11.0974	9.28258	10.4121	10.3694	9.87147	4.00453	5.4117	5.13358	5.91678	5.57564	5.55569	5.34938	4.85529
YDR313C	PIB1	32.3815	32.3789	35.2654	28.2512	31.6825	28.2405	27.6116	28.0313	115.414	139.839	121.191	150.27	153.694	127.146	150.965	133.05
YDR314C	RAD34	7.00411	6.56557	7.03655	5.48213	5.92895	5.61647	6.41457	6.15159	3.03863	4.14678	3.54482	4.52014	5.00291	4.80527	5.0515	4.41716
YDR315C	IPK1	8.36319	10.1743	11.4317	7.02897	8.6211	13.2209	8.01225	7.80389	1.10012	2.5943	1.27936	2.69798	2.39669	1.93461	1.98804	1.78902
YDR316W	OMS1	27.6535	40.3955	40.7895	24.1617	35.8244	52.4159	26.1341	26.0865	7.51309	15.7894	9.34088	16.5337	12.8325	13.1678	10.732	12.2595
YDR316W-A	YDR316W-A	7.4054	13.3851	12.5807	11.193	11.5404	16.4488	8.85361	10.0245	0.940194	1.08254	0.36809	0.0531945	2.20943	2.20051	1.86389	2.21014
YDR316W-B	YDR316W-B	0.00369192	3.93771e-05	4.62565e-05	6.86038e-11	0.000951794	4.5197e-05	4.08477e-05	1.77083e-05	3.56657e-09	0	0	0	0.00129874	0	0.000124844	2.99409e-05
YDR317W	HIM1	7.22886	8.09511	7.94251	4.25161	6.60663	7.12817	4.65923	5.40455	0.39573	0.370918	0.415784	0.687048	0.63416	0.971396	0.798606	0.84639
YDR318W	MCM21	14.2979	14.9462	15.0295	12.1918	11.9927	14.0245	14.0597	13.5339	0.595734	0.371965	0.566273	0.462246	0.577828	0.592338	0.628459	0.318196
YDR319C	YFT2	24.2047	25.7194	26.4479	19.4062	24.1437	26.5001	23.4171	21.9817	1.21638	1.66651	1.0647	1.83133	1.86126	1.62253	0.94878	1.84657
YDR320C	SWA2	20.0768	24.4373	24.2005	18.6604	22.0256	28.5683	18.3088	19.6468	1.15875	1.09757	1.2101	1.27932	1.88857	1.641	1.47745	1.51025
YDR320C-A	DAD4	131.206	168.483	155.083	127.977	155.023	188.571	131.873	142.874	8.8495	10.9435	9.98666	11.1067	14.0108	13.6954	16.7695	18.0945
YDR320W-B	YDR320W-B	7.6734	9.03538	6.24954	3.2332	7.94153	4.48968	7.61188	5.57137	0	0	0.46781	0	0	0	0	0.55889
YDR321W	ASP1	40.0334	40.9289	42.2899	54.9204	44.1413	60.176	46.4417	47.5739	0.612831	0.714435	0.686781	0.591865	0.877075	0.668924	0.896543	0.626982
YDR322C-A	TIM11	360.018	532.353	578.877	278.196	469.303	605.335	358.178	355.376	121.702	171.888	146.729	196.43	275.919	243.091	258.536	252.745
YDR322W	MRPL35	41.1795	47.0212	47.2544	40.4169	44.1767	49.8324	39.3582	36.8856	4.98036	9.38206	7.10109	9.30875	10.565	9.75265	9.88937	10.2319
YDR323C	PEP7	11.7148	12.2154	11.4903	8.35437	11.1059	10.1073	9.30151	10.2552	0.974766	1.17132	1.1054	1.45841	1.57494	0.863757	1.27141	0.705505
YDR324C	UTP4	5.18103	5.15565	5.09713	8.56161	5.2379	9.90309	7.72752	7.30577	0.498745	0.254616	0.478846	0.320465	0.754439	0.361835	0.593045	0.239314
YDR325W	YCG1	3.19522	2.98371	3.86288	3.28257	3.3609	4.75391	3.80204	2.65862	0.27633	0.318104	0.299942	0.274305	0.447851	0.293741	0.453631	0.175977
YDR326C	YSP2	15.5888	10.8217	13.4061	12.2808	12.0269	8.24402	12.083	11.6918	1.38349	2.936	1.8151	2.85859	2.8023	2.55529	2.54352	2.19831
YDR327W	YDR327W	163.618	228.599	219.618	158.504	193.262	297.63	150.626	160.785	81.1602	128.922	87.4333	129.951	117.913	119.896	112.828	134.629
YDR328C	SKP1	126.365	150.923	153.299	125.256	140.265	141.42	119.256	120.991	68.8344	102.493	77.1712	103.17	107.028	112.015	109.82	116.775
YDR329C	PEX3	44.0133	44.1414	44.5378	35.8186	43.3538	33.3728	36.1473	39.7511	59.1981	92.6881	70.6111	99.976	88.5246	80.5336	80.9829	84.0568
YDR330W	UBX5	63.7196	63.4914	63.8928	51.1366	63.3488	53.9624	51.7122	53.6643	44.6747	70.5539	51.8385	73.9591	58.4585	60.2341	60.3527	61.6898
YDR331W	GPI8	16.239	14.1179	16.859	16.667	15.8961	15.8272	15.9483	14.5352	2.04521	3.2104	2.72536	3.68998	2.80389	2.41845	2.73179	2.64895
YDR332W	IRC3	14.2788	15.9743	15.5767	11.9269	14.2627	15.7684	11.6769	13.1091	0.896296	1.30692	1.27305	1.64374	1.8446	1.6551	1.66813	1.69935
YDR333C	RQC1	34.0854	36.3056	37.5282	27.5585	34.4202	33.2256	28.0417	29.7557	15.897	27.6092	19.6885	27.4093	19.6452	18.0581	18.3848	17.2462
YDR334W	SWR1	17.9894	25.4501	23.5436	14.2792	21.3071	31.8974	14.5573	16.8959	31.3312	52.233	38.2234	51.3616	53.0651	41.9295	50.9528	39.096
YDR335W	MSN5	34.6738	43.9914	48.638	26.5183	41.9191	54.4173	31.9331	29.4993	11.2978	19.7686	11.97	20.5173	26.4624	25.2772	23.4888	23.174
YDR336W	YDR336W	17.8888	20.3667	18.9637	13.8057	16.5212	21.5665	15.2458	15.4048	1.9713	2.73649	1.81872	2.52159	3.46577	3.16195	2.86325	2.65376
YDR337W	MRPS28	41.0974	51.8121	56.7541	34.473	46.2802	64.4724	37.2371	34.95	7.20739	16.3094	8.31765	15.5619	12.5073	12.6554	10.9413	13.0914
YDR338C	YDR338C	20.7316	19.0064	19.0077	17.1104	19.1332	16.4402	18.6678	17.8177	8.77488	16.9267	10.4461	16.8461	26.0031	20.7618	23.8383	21.9167
YDR339C	FCF1	44.6489	33.4853	32.8408	59.7448	37.611	34.633	49.3922	47.7833	12.0555	29.3369	14.3631	24.2244	18.4806	16.5228	17.0172	16.0849
YDR340W	YDR340W	22.6007	21.9011	19.7387	16.1599	19.1206	16.0107	19.1009	22.9088	19.7957	27.0914	21.0684	27.5043	32.4867	27.3239	27.9067	26.7686
YDR341C	YDR341C	58.0932	49.8604	55.2556	82.1947	57.8293	56.7818	70.2606	63.0929	2.33234	1.88305	2.41713	2.3542	3.85462	2.01016	4.02495	2.18937
YDR342C	HXT7	2162.58	2709.19	2980.51	1869.84	2276.29	3481.63	1928.71	2002.54	282.421	194.947	261.848	261.292	648.495	319.078	594.197	387.228
YDR343C	HXT6	108.553	158.454	146.683	99.0523	116.716	202.287	95.8775	132.211	37.9683	29.448	34.8832	37.4935	40.2268	26.3453	39.9848	30.5353
YDR344C	YDR344C	4.86832	3.71033	3.88601	3.71924	2.88255	4.38503	5.65614	3.28154	1.10494	0.76912	1.26037	0.630627	1.93817	0.895547	1.69394	1.20248
YDR345C	HXT3	177.112	122.748	126.904	203.515	143.956	105.271	190.934	155.434	192.216	142.489	184.789	162.125	302.517	172.004	284.287	177.911
YDR346C	SVF1	34.621	31.2295	33.5567	39.7327	34.4554	37.9213	35.0506	37.2359	30.785	45.4269	37.6146	46.728	44.5349	42.6236	43.1228	44.0238
YDR347W	MRP1	88.1906	120.959	122.418	79.2059	116.044	132.174	75.2655	82.6744	36.0516	60.9407	42.8169	60.5851	45.7164	49.4149	42.4547	51.0006
YDR348C	PAL1	29.4881	32.1483	32.6821	25.5485	32.4954	33.7055	28.6951	26.1974	3.86959	4.94097	4.04505	4.42358	4.1051	4.15629	4.16681	3.86727
YDR349C	YPS7	27.2838	36.3214	39.2978	23.5461	32.5708	46.9244	25.5665	24.9031	23.3381	33.246	27.241	35.7312	38.0962	35.9156	34.7354	34.7673
YDR350C	ATP22	27.0584	29.7908	29.633	20.7867	27.7604	28.7754	22.1603	22.7911	9.66943	19.8652	12.3199	20.5987	16.9283	17.7893	15.4007	17.2287
YDR351W	SBE2	12.9443	11.9592	13.9136	10.5616	12.8316	16.7138	11.7451	11.1919	3.47362	8.59789	4.48107	8.19147	7.97617	9.36939	7.08022	9.69907
YDR352W	YPQ2	24.6105	26.9224	29.0288	21.9673	27.2938	29.4118	23.9472	22.6941	6.16813	10.2508	6.71101	11.4427	11.2801	13.2521	10.8075	14.9583
YDR353W	TRR1	193.627	203.378	224.729	204.725	218.586	214.726	203.767	212.725	49.7784	49.736	58.1575	53.0919	48.2249	46.4834	44.5845	47.3749
YDR354C-A	YDR354C-A	0	0	0	0	0	0	0	0	0	0	0	0	0	0.00485782	0	0.484242
YDR354W	TRP4	32.246	32.4063	35.3837	28.6237	33.6497	32.0706	31.3485	29.053	1.20211	1.56974	1.34908	1.48419	1.52612	1.5599	2.10989	1.56512
YDR355C	YDR355C	4.83491	3.99192	5.08773	6.50996	5.20953	1.95537	6.90938	6.36285	1.27728	1.0488	0.904098	0.499237	0.79252	0.661983	1.55646	0.836097
YDR356W	SPC110	14.739	15.138	15.5417	13.4929	15.5849	13.8784	13.9209	13.0524	1.31399	1.80678	1.39942	1.69554	1.86468	1.51094	1.921	1.27841
YDR357C	CNL1	70.8543	76.8535	72.2569	48.7836	69.1763	71.2059	51.3064	61.9098	6.23679	12.5563	7.36975	11.9799	14.7374	15.5535	13.2325	16.2345
YDR358W	GGA1	99.1554	85.6174	87.9352	80.4687	88.1051	69.1701	80.6165	84.4195	30.431	37.6456	36.8469	39.7392	34.3887	33.1232	34.9773	34.1608
YDR359C	EAF1	13.1085	16.5675	16.6293	10.0985	14.2857	21.8671	10.4571	11.4193	6.96916	9.3964	8.04055	9.67315	7.07242	7.60013	7.57638	8.02369
YDR360W	OPI7	11.2613	15.4834	14.0764	7.8449	15.2387	12.894	6.98276	12.6393	8.12566	8.30855	9.241	9.34975	7.71875	8.32561	6.30125	7.14935
YDR361C	BCP1	21.0653	16.7781	18.0439	26.6928	20.487	23.397	25.1356	25.1279	29.3452	56.0444	35.0376	53.9352	40.082	37.3673	37.7625	32.609
YDR362C	TFC6	11.823	13.7122	13.2891	10.8407	12.4447	13.8427	9.92982	11.4982	8.35369	15.2306	9.42146	14.1382	11.1823	11.8882	9.81019	11.0456
YDR363W	ESC2	14.7274	15.7881	16.087	13.9216	15.0654	15.4772	13.772	13.5625	4.05207	6.85269	4.86253	7.26393	5.14086	6.05718	5.21589	6.16393
YDR363W-A	SEM1	302.153	381.494	359.902	223.608	330.801	416.026	238.176	276.365	132.684	269.566	165.429	288.716	195.95	236.394	198.915	236.017
YDR364C	CDC40	12.8035	13.1612	14.2906	11.5845	12.6275	13.2853	11.6826	12.1181	5.50506	11.1442	7.17208	12.5256	12.5703	13.4246	11.1888	12.6861
YDR365C	ESF1	25.8431	30.9634	27.6538	40.8505	29.72	40.6712	35.8744	38.6081	3.44777	6.08311	4.40474	5.62351	6.71321	4.86912	5.40899	4.19962
YDR365W-A	YDR365W-A	0	0	0	0	0	0	0	0	0	0	0	0	0	0	0	0
YDR365W-B	YDR365W-B	0.0252651	0	0	0	0	0	0	0	0	0	0	0	0	0	0	0
YDR366C	YDR366C	26.007	32.8784	28.3873	20.2525	24.9634	32.8999	18.2727	23.1457	2.30937	5.46786	2.90664	4.69607	4.99899	5.02835	3.713	3.08997
YDR367W	KEI1	71.142	78.6773	76.9446	67.5811	75.5734	76.9079	66.9888	71.7857	2.91537	5.74725	4.29697	5.8175	6.12637	8.68375	5.5772	6.43525
YDR368W	YPR1	151.301	157.282	162.69	142.236	148.359	158.866	126.611	138.864	14.5457	27.1239	17.3124	26.7648	29.4829	30.1465	30.8004	31.8493
YDR369C	XRS2	6.95366	7.66216	7.62389	5.73834	7.17283	7.57464	5.91993	5.60721	0.81121	1.13516	0.8467	1.22423	1.96221	1.81578	1.76755	1.83197
YDR370C	DXO1	8.22683	8.42736	8.61737	7.69237	8.19248	9.70692	7.88775	6.60785	0.860382	1.1904	0.807586	1.15033	1.47865	1.1119	1.42371	1.16386
YDR371C-A	YDR371C-A	0	0	0	0	0	0	0	0	0	0	0.102335	0	0	0	0	0
YDR371W	CTS2	14.0909	16.5352	16.5289	9.37748	14.7433	15.7058	11.8654	12.9215	0.389432	0.596867	0.622599	0.553156	0.896852	0.775872	0.924917	0.975735
YDR372C	VPS74	51.9988	53.8024	61.6501	43.2947	52.8704	69.0412	51.4936	47.8326	3.94977	8.5032	4.90538	8.5705	7.32034	8.48427	6.66576	8.06448
YDR373W	FRQ1	73.5519	70.8391	77.1828	69.2875	73.1284	76.5672	71.7941	68.4001	22.4868	47.2088	30.2052	50.9718	25.1762	31.3734	26.2715	31.8901
YDR374C	PHO92	2.72311	2.04447	2.09585	1.56158	1.72474	1.0285	1.72983	2.20984	2.37021	2.6025	2.9915	3.00662	1.27701	1.28363	0.984767	0.836279
YDR374W-A	WIP1	47.988	53.3497	46.3094	33.2699	43.9078	58.1009	33.7557	38.7393	23.6773	45.4093	29.1509	43.3543	39.19	43.957	37.5555	50.457
YDR375C	BCS1	38.9445	46.4266	44.4355	43.9251	43.3702	45.9827	36.7607	39.1108	13.7172	18.6476	14.8203	17.7251	8.72344	10.7019	8.95956	9.55932
YDR376W	ARH1	33.5778	41.4389	40.5759	27.2798	37.8231	39.2419	27.896	31.4909	20.3428	27.3621	25.2417	30.2116	15.2175	19.1159	14.1735	19.3869
YDR377W	ATP17	399.732	580.653	642.729	236.015	517.875	607.194	382.074	361.525	308.923	318.497	397.139	381.288	334.99	321.106	332.095	351.443
YDR378C	LSM6	246.603	233.161	250.014	211.188	250.928	288.82	240.187	236.293	46.0702	91.8188	56.4589	92.746	53.0211	73.8591	55.6607	67.9535
YDR379C-A	SDH6	113.327	158.64	160.929	54.9723	136.967	162.452	87.9522	85.7452	108.995	124.997	129.495	141.735	169.49	167.306	176.817	167.878
YDR379W	RGA2	20.3653	18.5551	19.9261	18.5822	19.0412	18.1056	17.0271	17.4643	3.32723	5.49651	4.65107	5.44941	3.10986	3.87166	3.26781	3.7142
YDR380W	ARO10	14.6665	16.3081	15.6685	10.679	15.6774	14.4013	12.1741	13.2655	10.8002	8.79924	10.8428	11.9357	5.25148	9.5172	5.41166	10.0744
YDR381C-A	YDR381C-A	104.584	151.775	124.559	85.2376	125.36	156.41	90.8587	108.431	40.3248	79.1965	50.6752	82.9161	66.7834	88.342	64.2267	88.052
YDR381W	YRA1	301.443	226.547	248.943	306.78	231.575	215.394	288.617	266.916	90.9013	117.202	96.9825	120.999	139.539	130.476	137.106	132.458
YDR382W	RPP2B	4295.71	4770.1	4803.67	4420.26	5085.09	4822.92	4821.13	4715.24	39.9758	47.4122	48.1336	46.4029	20.3584	24.3433	21.1439	21.4946
YDR383C	NKP1	26.2887	20.5784	19.7718	22.0239	21.4361	20.2105	22.0532	21.5217	3.78481	4.07249	4.07674	3.76421	2.73311	1.91499	2.57638	2.49997
YDR384C	ATO3	20.9816	17.3274	18.889	26.2261	19.1892	16.1763	25.3189	19.0393	61.8541	59.2716	75.0171	67.186	75.5698	47.5334	78.6725	54.4514
YDR385W	EFT2	247.975	264.564	283.723	271.782	269.687	305.098	219.838	248.208	14.9067	14.7868	19.9568	15.353	17.7842	13.2718	17.4211	12.8596
YDR386W	MUS81	4.72004	4.53648	6.05133	4.06268	4.51287	5.71178	4.43008	4.23762	0.915595	1.22363	1.06727	1.13554	1.50965	1.26301	1.66703	1.35992
YDR387C	YDR387C	35.4506	39.1661	38.4486	26.5636	35.3931	31.514	28.2432	31.3867	4.11099	7.15682	5.03831	8.58939	8.13474	8.60787	7.58132	8.96957
YDR388W	RVS167	137.035	190.86	198.409	120.867	176.96	209.197	120.051	133.143	24.4747	33.7989	27.2136	34.116	40.7512	41.057	41.4022	42.9517
YDR389W	SAC7	25.9472	26.8915	30.4346	24.2954	26.2211	30.7255	22.8524	22.4836	12.1993	20.727	15.4369	23.4031	21.5808	21.2612	20.8668	23.0448
YDR390C	UBA2	33.6468	39.9118	40.332	30.4792	39.391	41.149	31.2576	32.4417	2.41459	2.80365	2.56149	2.28322	2.83757	2.53666	2.6915	1.87275
YDR391C	YDR391C	96.5456	108.556	109.806	83.5067	106.35	104.693	86.5303	97.8234	33.9388	42.6832	37.1432	45.0599	34.6888	38.1551	30.4709	38.8105
YDR392W	SPT3	35.5283	42.4022	39.8637	29.7474	37.6058	38.842	29.8382	32.0818	16.0426	28.4485	19.1028	29.3618	21.8986	23.4126	21.3804	23.5442
YDR393W	SHE9	36.762	40.4933	40.6705	32.6952	38.0578	35.1116	27.8795	34.3978	3.64243	6.31278	4.18783	6.35426	4.23793	5.74481	4.22039	5.36732
YDR394W	RPT3	104.437	113.105	107.566	96.8433	110.369	119.509	84.3354	94.6957	32.9219	56.6844	45.0958	61.8377	29.6615	35.7399	30.7471	38.0148
YDR395W	SXM1	17.9361	16.0623	18.8303	21.4643	18.0761	23.4627	20.0207	17.8062	2.13232	4.16334	2.68186	3.99083	3.46852	3.10427	3.72178	2.88676
YDR396W	YDR396W	55.1718	59.7244	53.2795	53.4676	59.3949	60.6854	57.8537	57.3353	19.5536	42.8647	24.9868	49.3566	40.2327	43.8568	37.1016	45.8845
YDR397C	NCB2	45.1627	36.5927	43.3105	55.2435	43.1766	37.2686	50.7588	43.4876	13.0739	22.1324	13.3425	24.743	25.0585	29.311	29.1247	33.7655
YDR398W	UTP5	13.6189	15.0283	14.92	20.5646	16.5676	21.9406	18.7197	17.2988	2.22729	3.96174	3.07053	3.36132	3.05244	2.59885	3.6544	2.70443
YDR399W	HPT1	60.5338	48.9309	51.4105	112.829	60.4185	58.3049	103.917	75.1604	135.097	206.203	155.253	268.89	145.142	193.024	176.206	231.669
YDR400W	URH1	36.8386	34.3225	28.3753	34.4041	31.5434	30.7743	25.88	33.5361	11.6522	23.2518	15.236	25.2205	21.1576	22.6668	20.1897	22.5775
YDR401W	YDR401W	5.38229	7.4646	8.19748	2.9862	6.47294	6.41693	3.90463	4.66913	0.947312	1.47375	1.14219	1.85712	1.35707	1.28741	1.0326	1.16998
YDR402C	DIT2	3.74504	4.4446	3.94235	2.86217	3.09508	3.95977	2.02907	3.1218	0.427813	0.570805	0.307878	0.43178	0.539817	0.703383	0.643554	0.515072
YDR403W	DIT1	4.13283	3.02696	3.20383	3.01572	2.9406	2.19689	2.4987	3.31468	0.729151	0.843174	0.620714	0.859282	0.862522	0.871159	0.68983	0.794303
YDR404C	RPB7	192.495	215.156	197.859	170.456	196.754	204.125	181.808	194.704	23.1673	49.6229	29.1375	46.217	33.4802	39.8138	31.2989	37.7845
YDR405W	MRP20	159.599	157.758	149.301	165.449	157.339	147.055	140.51	150.633	72.1254	111.157	84.7226	120.043	101.73	102.703	100.259	106.388
YDR406W	PDR15	456.614	263.704	240.645	467.851	231.044	151.394	446.092	366.649	67.6055	69.8154	76.7008	74.6188	226.61	116.232	185.777	118.528
YDR406W-A	YDR406W-A	35.5601	32.6719	23.3346	25.0846	21.6875	17.9643	29.3464	27.5664	7.40345	12.808	7.47048	11.1973	27.279	16.4923	18.0818	13.0854
YDR407C	TRS120	12.5496	13.856	15.9861	10.4774	14.1467	16.873	11.7095	10.9451	0.762682	0.866494	0.877221	1.07649	0.991419	0.774367	0.912158	0.766308
YDR408C	ADE8	168.88	223.58	209.424	202.462	200.359	164.901	183.107	191.315	93.4314	187.123	104.145	219.054	135.547	184.237	158.946	220.231
YDR409W	SIZ1	12.6993	11.0597	12.9736	11.5152	10.8846	10.8473	10.9973	11.4232	6.3637	10.8944	7.4134	12.1643	8.59334	9.07419	9.22558	10.3742
YDR410C	STE14	18.9328	20.4291	22.8378	20.6706	19.5994	18.8685	18.198	20.6145	0.699762	1.23018	0.709556	1.24798	1.01149	0.833209	1.09818	1.0288
YDR411C	DFM1	83.8956	84.3338	75.9481	73.8568	84.2869	63.5222	61.9121	74.8356	6.58188	9.84189	7.92571	9.43885	10.2769	11.8849	9.86314	11.8083
YDR412W	RRP17	8.79489	8.16369	7.51829	12.3314	7.24792	8.14033	9.67379	8.25751	2.03868	3.07844	2.79205	3.48678	4.03374	3.15681	4.21547	2.32603
YDR413C	YDR413C	27.4184	27.8773	29.5558	38.6507	30.1009	41.6302	37.785	38.0921	3.17696	6.00927	3.36552	5.7316	4.95336	5.26042	5.22484	5.9043
YDR414C	ERD1	11.5327	11.7855	13.3499	12.7213	11.17	13.2279	10.6376	10.8465	0.751991	1.31814	0.926775	1.3788	0.798094	0.728333	0.988537	0.870874
YDR415C	YDR415C	23.2081	26.392	28.6039	21.0365	24.8123	28.7239	22.2011	21.4203	4.77364	8.76024	5.7756	9.72704	8.61485	9.21267	8.3161	9.34912
YDR416W	SYF1	12.2697	13.5973	14.5915	10.2169	12.7459	13.7405	11.1697	10.9005	0.95525	1.90327	1.49137	1.91853	1.87727	2.05451	2.05749	2.02862
YDR417C	YDR417C	260.176	174.526	222.658	363.654	239.37	226.374	326.698	280.164	3.74238	1.73685	4.99152	2.18473	2.08859	1.33506	2.22978	0.980645
YDR418W	RPL12B	637.881	522.118	596.172	882.645	615.765	726.273	857.701	669.317	9.28982	7.21014	8.87461	9.35194	4.30202	2.44531	3.16718	3.22193
YDR419W	RAD30	8.55437	9.99684	12.3123	7.0531	10.1215	11.5999	7.79548	7.7592	2.66215	2.9001	3.1614	3.05293	3.59682	3.17638	3.55827	3.60833
YDR420W	HKR1	5.39269	6.91242	6.77713	4.86682	5.73612	10.5878	5.08005	4.83848	1.2045	2.28666	1.40757	2.53451	3.14734	3.64701	3.15754	3.84454
YDR421W	ARO80	8.50729	10.7712	11.2151	6.62807	9.41425	11.714	8.03781	6.91902	2.48508	3.8432	2.75771	4.08424	6.41336	6.24574	5.77161	6.39465
YDR422C	SIP1	22.5985	26.3696	27.8649	19.6814	24.4291	28.5871	20.336	20.3674	4.90091	9.64133	5.91176	10.4934	10.0442	10.1179	9.69066	9.80962
YDR423C	CAD1	32.1131	28.9944	29.0489	30.5119	30.8906	25.7317	32.5192	32.353	15.3003	20.4677	16.7212	19.9774	21.1722	18.9802	19.6115	19.0918
YDR424C	DYN2	114.468	121.011	128.383	110.055	122.673	142.479	114.813	104.777	16.8757	23.1759	20.0678	25.416	28.9883	28.2135	22.9735	26.023
YDR425W	SNX41	26.3171	19.4281	20.1148	17.2581	19.8574	13.7605	20.5287	21.4255	3.07889	5.80401	3.79662	6.59365	7.5267	6.89512	6.66857	6.86821
YDR426C	YDR426C	28.009	34.227	26.3654	18.7084	26.5003	35.5284	19.6903	27.1964	2.2895	8.77401	3.48115	7.21151	7.61595	7.17654	6.9223	6.98422
YDR427W	RPN9	100.4	109.519	108.264	79.6175	102.628	110.735	83.0467	93.0516	8.77414	22.7768	13.538	24.8996	13.537	17.9807	12.9216	16.8521
YDR428C	BNA7	21.1915	23.6581	21.2058	18.9624	20.1315	23.5762	18.647	19.6964	0.711231	0.939019	1.17712	1.40116	1.24327	1.32756	1.063	1.09672
YDR429C	TIF35	127.246	118.753	119.108	167.119	120.795	132.107	152.358	141.643	12.184	26.0077	14.0753	24.491	20.4472	19.3206	19.4372	18.4417
YDR430C	CYM1	34.3946	49.1848	48.5107	29.0186	41.0532	55.6556	26.5044	31.3432	7.89493	17.7466	10.2548	18.7512	11.2645	12.7366	10.6458	12.6456
YDR431W	YDR431W	3.26393	4.69258	4.38028	3.49425	6.37106	4.55334	3.30209	1.97058	0.959804	1.92633	2.12191	2.60589	1.57587	1.52903	2.40471	1.37311
YDR432W	NPL3	59.1166	63.7565	72.2814	68.1791	66.4581	78.0835	55.6972	56.3118	170.312	214.145	194.522	231.595	183.039	160.291	169.933	168.58
YDR433W	YDR433W	125.049	148.178	148.042	134.635	132.976	178.797	128.161	128.746	238.9	340.867	269.704	358.23	257.955	265.743	247.24	248.257
YDR434W	GPI17	50.7486	56.9963	56.4451	41.8654	52.8045	52.1609	39.9407	46.5871	6.16342	14.15	8.70679	15.4642	11.784	13.213	10.6489	12.5654
YDR435C	PPM1	69.4683	80.0627	84.5639	45.8157	76.9316	72.0174	58.0494	60.4563	7.22058	11.3624	8.50793	12.6123	18.5804	15.6533	18.3791	15.659
YDR436W	PPZ2	47.35	52.4259	53.9417	29.7532	49.1248	41.1039	37.2625	38.2947	13.8335	22.246	14.8296	23.0637	37.399	35.5817	35.9012	37.8612
YDR437W	GPI19	11.462	6.80865	8.8722	8.11122	9.33616	8.37263	10.7895	9.2544	3.00912	5.23043	3.75693	3.95738	4.38417	4.13058	3.72066	4.39357
YDR438W	THI74	14.33	15.2202	15.498	10.6955	14.136	15.2273	12.1669	10.9349	2.41009	4.277	2.57648	3.87874	3.13018	3.3063	3.12238	3.51112
YDR439W	LRS4	13.5776	15.3905	16.2825	11.9387	15.0511	13.7191	14.3776	11.7638	1.27716	2.50513	1.75704	2.36651	2.89619	2.2419	2.55955	2.6936
YDR440W	DOT1	4.32283	4.21508	5.77012	4.01776	5.00444	5.28789	4.50464	3.25422	0.235875	0.253098	0.256717	0.1732	0.210722	0.268393	0.352196	0.139
YDR441C	APT2	12.9925	13.9736	16.5959	9.4958	16.7916	20.0818	14.8234	13.503	3.66219	4.79494	4.47365	5.14785	7.72628	5.45331	6.48801	7.15495
YDR442W	YDR442W	21.7676	31.0285	32.6838	22.9271	28.725	47.1062	23.672	23.4031	4.27189	6.08003	5.30223	6.9743	6.34484	6.91163	8.05531	7.91142
YDR443C	SSN2	5.01788	7.55245	8.95599	4.11111	7.59784	10.4489	5.25931	4.50651	1.45681	2.29003	1.7968	2.37914	2.41203	2.76803	2.30264	2.70866
YDR444W	YDR444W	13.2298	14.808	16.0906	12.5831	14.8015	14.2558	13.163	12.5908	2.24819	2.43285	2.2003	3.07372	2.52854	2.83408	2.26545	2.65241
YDR445C	YDR445C	15.2571	19.9963	15.2381	18.2186	19.2235	19.0043	19.0312	16.1754	2.58218	3.41073	2.70997	2.71021	2.69456	2.50236	3.07615	1.93537
YDR446W	ECM11	0.131796	0.0554039	0.0655388	0.16704	0.0337059	0	0.0576474	0.166395	0.844805	0.49301	1.18953	0.671669	0.424659	0.309559	0.386625	0.33996
YDR447C	RPS17B	383.561	338.379	365.655	523.606	398.977	508.607	523.768	435.722	10.9797	10.639	13.1218	11.2644	6.77989	5.00391	6.76564	5.77296
YDR448W	ADA2	9.24021	7.32458	8.37389	8.68925	7.48728	7.2479	8.07449	7.35942	6.45437	7.84888	7.22471	8.37728	6.3163	5.83554	6.97192	6.14991
YDR449C	UTP6	4.73286	2.21991	2.5169	7.23233	2.93955	2.80523	5.88703	5.61795	0.518911	0.504572	0.617922	0.445797	0.818985	0.410298	0.642534	0.285681
YDR450W	RPS18A	1147.36	1072.66	1192.39	1404.34	1242.36	1381.83	1426.61	1243.1	19.2226	17.7488	21.8123	19.2421	12.0899	9.49906	12.9272	10.079
YDR451C	YHP1	2.33324	2.82321	3.77117	3.8071	3.46349	3.43956	2.97899	3.06976	1.26634	1.11591	1.18953	1.22248	0.606777	0.4576	0.584599	0.545417
YDR452W	PPN1	117.972	161.265	152.896	101.637	142.121	165.044	99.3404	113.328	33.4789	31.5578	34.6172	32.9753	24.6823	24.771	25.4278	26.3544
YDR453C	TSA2	78.2031	129.778	127.171	69.9001	105.415	111.732	74.5029	111.104	126.026	20.176	110.302	24.888	19.8773	16.7832	17.7714	19.7662
YDR454C	GUK1	168.069	180.962	192.403	193.188	191.289	214.172	192.448	193.16	13.1786	14.9911	14.6143	14.0663	16.0335	17.1504	17.0616	17.0896
YDR455C	YDR455C	16.7107	17.7429	18.9183	9.17586	16.2341	12.8343	15.8993	11.9219	5.00769	7.12002	4.35139	9.80057	10.7318	10.0949	13.126	12.3239
YDR456W	NHX1	34.9556	41.0048	45.3096	29.1854	39.2111	41.5916	32.3392	31.3789	6.57936	9.77097	7.33158	10.1519	11.3207	11.0665	9.87828	10.6661
YDR457W	TOM1	10.0536	11.9031	12.5149	8.96092	11.3875	14.6493	9.07924	9.39834	3.31188	3.37268	3.23137	3.5697	4.44115	4.25447	4.2069	4.33199
YDR458C	HEH2	24.2317	28.1342	28.0733	18.4295	26.0106	28.9962	22.8257	21.725	2.76737	3.54833	2.96955	3.28637	3.97161	3.77413	3.46029	3.96591
YDR459C	PFA5	14.6781	16.9586	18.647	11.4451	16.9851	17.7593	12.9914	12.0142	7.23701	13.1925	10.0159	14.0782	11.4499	11.1441	11.4699	10.91
YDR460W	TFB3	26.3398	27.0826	28.103	20.9906	26.1943	27.1466	21.8176	23.3237	28.5409	40.9117	33.5241	41.2019	37.5857	34.5986	36.604	34.8879
YDR461C-A	YDR461C-A	194.169	233.054	218.12	104.892	193.521	161.437	130.97	158.401	442.166	652.735	478.684	610.059	662.738	660.226	665.418	684.964
YDR461W	MFA1	58.8962	60.7369	50.0765	43.0431	52.7305	50.3882	32.8499	57.4619	109.582	128.426	138.313	122.593	126.143	159.431	137.233	140.181
YDR462W	MRPL28	169.103	167.855	158.09	153.158	172.592	138.466	136.926	166.214	151.617	239.492	182.602	240.555	176.624	189.617	172.479	185.354
YDR463W	STP1	60.9413	47.3497	52.5895	47.6789	51.7154	33.5525	47.9934	48.6647	112.844	145.876	138.542	160.388	108.895	112.9	106.279	117.353
YDR464C-A	YDR464C-A	0	0	0	0	0	0	0	0	0	0	0	0	0	0	0	0
YDR464W	SPP41	19.4186	21.3736	20.7859	19.6741	20.6227	22.0394	17.3354	17.681	31.1657	66.4517	39.4206	65.142	55.769	52.5387	53.4851	50.8414
YDR465C	RMT2	15.4844	16.9706	16.2007	25.1519	17.1337	27.1817	20.9661	21.0353	2.59909	3.97851	3.41023	3.70973	6.40969	3.66325	5.59001	3.55135
YDR466W	PKH3	16.632	20.3078	22.1805	11.2016	19.0152	20.7502	14.4328	13.8584	6.28798	12.4468	7.23266	14.4939	14.2096	14.7381	13.3347	15.1808
YDR467C	YDR467C	41.4513	62.0701	63.1554	28.2082	54.9368	80.169	38.0841	39.5852	10.1787	24.5252	14.8209	32.9614	29.5659	29.681	25.4751	34.9752
YDR468C	TLG1	40.2344	50.329	51.9303	33.5362	48.254	57.133	39.9481	36.7313	4.04584	4.37348	4.74491	4.10481	3.98941	4.79899	4.58205	4.51449
YDR469W	SDC1	17.9253	16.3855	20.0039	19.9308	16.4442	19.9735	21.1717	17.1679	2.03296	5.12127	3.41526	4.47086	3.52279	4.12325	3.73141	4.65843
YDR470C	UGO1	34.6366	31.6112	32.2092	28.9297	30.9183	27.4734	27.2033	28.4652	3.3371	4.53519	3.66308	4.12987	3.33268	3.27583	3.6231	3.53675
YDR471W	RPL27B	333.191	259.189	299.679	453.486	289.914	359.167	454.294	352.132	9.78391	9.8793	12.3801	11.1349	5.08492	4.93629	5.19382	4.6054
YDR472W	TRS31	44.0457	40.0694	40.2437	47.2026	38.8559	37.0853	40.5172	40.8666	4.71237	5.8228	6.25891	6.40466	4.98151	4.45819	3.94129	4.03007
YDR473C	PRP3	30.5276	40.3927	37.2825	26.1715	36.0579	41.7041	25.6459	30.9413	23.7527	36.3575	26.9974	36.7255	30.8251	32.7241	28.4941	31.9861
YDR475C	JIP4	34.9036	42.6847	40.1775	30.3089	38.3373	38.8328	29.7388	32.004	49.78	43.1623	50.6173	42.6511	42.4771	36.0881	40.5587	35.9488
YDR476C	YDR476C	68.1545	71.1981	69.7528	55.8801	70.9763	64.7662	56.36	59.2282	83.7279	89.4278	83.5326	87.243	72.4284	73.671	74.3421	72.4186
YDR477W	SNF1	45.2716	48.3842	55.5254	37.5356	47.7277	47.8634	40.7054	39.1501	20.8686	27.1813	23.1489	27.0015	26.9448	24.219	27.3854	23.9022
YDR478W	SNM1	13.8582	12.3597	10.6899	19.2391	12.2355	13.1704	17.0013	14.4285	16.5468	11.8161	18.0243	12.2166	10.2677	7.79369	10.3894	7.29434
YDR479C	PEX29	48.4438	55.2027	56.6167	36.3984	54.5383	51.1069	40.354	43.8998	34.662	54.3067	38.6764	55.4154	47.9222	45.165	46.4806	47.371
YDR480W	DIG2	32.5491	37.1165	34.714	27.7357	33.6398	27.061	27.2781	27.7911	21.453	34.6774	27.6008	33.5041	20.622	22.3425	20.9435	21.9815
YDR481C	PHO8	89.0391	77.5939	82.0088	67.1585	80.2026	53.7064	66.6575	66.7568	224.026	243.507	249.708	253.591	200.73	201.934	193.844	210.787
YDR482C	CWC21	36.2649	45.4196	44.6249	35.9867	41.7446	49.0679	32.8829	36.8618	91.9035	161.939	105.721	169.668	141.779	137.078	130.344	137.65
YDR483W	KRE2	104.653	117.594	140.632	88.329	119.898	139.173	89.8764	91.93	104.037	160.733	129.105	176.444	157.265	155.371	156.42	159.91
YDR484W	VPS52	19.4167	16.4442	17.1726	16.3061	16.3686	14.7082	16.6513	16.2257	0.742438	1.19541	0.812049	0.861522	1.0276	1.00227	0.931114	0.937291
YDR485C	VPS72	26.4514	32.4383	29.8394	24.5422	28.6642	31.3907	22.1366	24.311	18.2797	29.9593	21.4804	30.5863	22.0136	20.9016	21.4177	20.9418
YDR486C	VPS60	43.2326	52.3419	62.5054	37.8291	52.5136	59.7629	41.9065	39.3785	25.1339	49.9434	32.3155	50.5541	35.9837	44.7074	37.0257	43.8084
YDR487C	RIB3	147.945	141.754	152.648	145.847	157.426	138.191	136.84	137.429	18.223	26.429	22.6984	26.9335	14.1953	14.8799	14.0409	14.3512
YDR488C	PAC11	9.52352	10.0532	11.9845	7.17675	10.3741	9.23566	8.51971	7.77856	0.789454	0.941426	0.761241	0.81974	0.745677	0.512326	0.705919	0.602215
YDR489W	SLD5	25.3986	28.4012	26.9635	19.7954	28.0079	23.4671	21.3687	21.3378	1.65329	3.40361	1.71716	2.32829	2.87652	2.24	2.96126	1.84488
YDR490C	PKH1	38.7064	50.5522	50.1369	30.3195	44.4232	47.1834	29.7796	33.3368	24.7947	41.3804	25.8407	39.6303	42.6442	45.5843	39.6752	47.0591
YDR491C	YDR491C	4.82847	2.28228	2.93802	3.57839	2.6175	1.59913	2.2749	3.11157	5.29892	15.6794	7.36468	17.2504	12.1677	17.1658	9.38436	15.3491
YDR492W	IZH1	23.5049	13.3425	11.0983	21.6489	11.9928	8.80775	15.1819	15.1535	62.4593	138.363	82.1271	156.142	104.377	155.62	103.724	171.461
YDR493W	MZM1	49.7513	54.3569	54.6994	48.3183	46.9842	64.0781	42.0428	41.4199	39.9879	72.9917	45.7028	75.7008	44.2958	56.167	46.8092	55.4672
YDR494W	RSM28	92.035	121.393	114.679	79.813	102.137	118.903	76.8903	85.0083	47.2546	103.909	60.1475	111.486	96.5595	102.587	90.5074	98.8689
YDR495C	VPS3	12.0288	13.3709	13.5062	9.85049	13.2157	14.6606	11.3325	10.7122	1.88071	4.53592	2.08397	4.39766	4.57854	4.35786	3.74953	3.91962
YDR496C	PUF6	15.626	13.8842	14.65	22.4645	15.7246	16.764	18.3241	19.1297	1.83193	2.35909	2.19682	2.23424	3.16167	1.74625	2.3961	1.40123
YDR497C	ITR1	872.537	986.497	1148.21	742.099	1032.82	1244.26	833.125	738.747	223.771	343.295	251.585	372.205	418.938	380.803	373.863	382.711
YDR498C	SEC20	47.1904	47.3511	42.5235	38.9267	48.6423	38.7437	40.7916	42.1879	8.59499	18.1415	11.0068	18.2691	11.6174	15.1081	13.4862	15.0513
YDR499W	LCD1	8.03315	7.42582	7.76885	7.36088	7.78957	7.95339	7.20694	7.32085	3.2526	6.09287	4.32164	6.92576	3.47357	4.25739	3.53654	4.29207
YDR500C	RPL37B	1233.48	1253.18	1370.45	1513.3	1412.72	1756.84	1584.02	1366.6	38.9177	47.5267	44.6181	48.2104	20.2391	21.504	21.0084	20.8136
YDR501W	PLM2	18.1229	16.84	21.3331	17.895	19.551	18.8291	17.0111	13.2385	2.81043	5.32852	3.25349	4.64157	5.4039	4.25128	4.57374	3.96495
YDR502C	SAM2	782.542	581.699	821.682	831.557	740.566	1153.16	727.527	585.755	472.86	673.018	556.976	770.056	599.59	610.139	571.571	676.082
YDR503C	LPP1	16.6724	20.813	22.49	13.7539	22.6229	21.6429	15.34	16.4941	32.3962	54.0858	35.5609	54.4272	29.2749	37.5428	32.9765	38.3223
YDR504C	SPG3	61.0289	65.7306	62.2546	38.4169	49.1195	58.7904	53.5024	57.1934	33.178	81.6495	49.8409	89.246	106.576	103.343	84.0601	103.133
YDR505C	PSP1	43.3926	38.1277	39.4073	34.4311	36.9549	22.243	36.6478	37.0491	75.6116	109.797	102.435	130.228	144.855	126.702	136.933	138.098
YDR506C	GMC1	3.82606	5.1414	5.20637	2.99592	4.69379	4.43072	2.87377	3.09988	2.52079	2.75414	2.64898	2.56358	2.78004	3.07863	3.30568	3.17877
YDR507C	GIN4	7.57679	6.81895	7.51979	8.51145	7.79681	6.75689	7.81827	6.22524	0.906666	0.998837	0.815555	0.974525	0.942254	1.21898	0.962966	1.14888
YDR508C	GNP1	149.134	161.986	177.604	137.644	157.344	146.764	148.877	155.561	5.68066	7.04307	7.37283	7.63139	13.9965	10.2378	13.0799	10.2593
YDR509W	YDR509W	58.0754	54.1127	53.6907	50.0258	57.9651	37.075	54.3914	53.4551	2.2279	3.22891	2.95305	3.35361	4.15227	3.88005	5.44174	4.42489
YDR510C-A	YDR510C-A	307.222	365.804	295.907	313.069	313.834	389.891	264.917	264.47	77.6832	137.814	82.2911	168.898	106.151	114.39	116.671	122.025
YDR510W	SMT3	470.774	489.592	504.393	470.36	495.058	447.067	429.535	473.909	149.173	230.768	172.087	254.833	169.359	218.9	192.712	228.318
YDR511W	SDH7	99.5521	114.946	113.07	106.045	109.314	105.988	92.5155	102.473	66.1422	116.617	82.2814	125.011	105.568	125.443	106.557	134.166
YDR512C	EMI1	50.3658	72.8623	71.612	48.9742	64.3729	83.3253	47.161	55.2262	16.6078	27.5253	20.3329	32.5258	37.9094	41.6688	37.9429	46.322
YDR513W	GRX2	661.95	716.26	733.671	537.267	672.248	509.758	576.737	665.316	126.178	229.41	175.875	283.942	276.823	333.648	280.868	390.454
YDR514C	YDR514C	11.4608	13.6569	12.2583	12.1115	12.4813	13.1483	12.0528	12.475	1.97083	4.67076	3.09539	5.08982	2.70223	2.48054	2.12834	2.56886
YDR515W	SLF1	7.88959	11.2499	12.1735	7.05052	11.2297	16.3314	7.60557	8.10111	3.53353	6.98095	5.36683	8.23737	3.61985	4.07105	3.98726	4.19506
YDR516C	EMI2	727.397	589.75	654.888	577.612	649.512	395.519	613.996	616.384	70.9128	49.8233	72.0183	53.0364	77.5464	47.7323	75.9084	48.7848
YDR517W	GRH1	129.563	157.821	151.525	108.948	146.847	156.67	110.729	119.792	53.5416	57.9983	55.0008	59.6416	59.8545	55.73	57.9056	55.8219
YDR518W	EUG1	30.9258	31.6194	30.9851	27.5289	29.8778	33.5622	22.8079	26.6939	2.41195	2.92169	2.86766	2.75321	3.03511	2.32083	2.71441	2.33392
YDR519W	FPR2	152.526	140.164	118.494	154.071	140.592	137.371	123.423	152.45	8.13987	11.6829	9.98898	13.5604	10.6477	11.4973	9.33497	11.2246
YDR520C	URC2	9.04423	8.61157	9.52151	7.86316	7.90026	8.71901	7.28367	7.71658	2.42577	6.43937	2.7949	6.47057	5.33198	5.62262	4.76477	5.8218
YDR521W	YDR521W	5.90364	5.10159	5.63428	4.2249	4.44123	4.19579	5.222	5.1376	4.21888	7.07201	4.76729	4.67595	5.9616	5.46659	6.21281	6.65618
YDR522C	SPS2	1.28981	1.16229	1.29992	0.938179	1.24716	1.3833	0.791253	1.19997	0.367478	0.931889	0.32352	0.94843	0.823368	0.986403	0.603849	0.819776
YDR523C	SPS1	2.82998	3.78747	3.59955	2.40227	2.83097	4.2823	1.96809	2.65425	0.377616	0.663856	0.579092	0.530425	0.72515	0.851031	0.633412	0.589724
YDR524C	AGE1	12.5046	13.0005	14.6501	9.25783	12.8808	16.4601	10.5235	11.3273	5.27131	12.0683	6.69688	11.284	11.1488	12.9801	10.851	12.7886
YDR524C-A	YDR524C-A	3.67817	0.812934	2.84222	3.26787	3.00672	0.938896	2.55951	6.04462	0	0.676534	0	1.31901	0.711416	1.46063	0	1.43415
YDR524C-B	YDR524C-B	2642.86	1452.72	1766.62	3249.18	1883.61	1567.89	3057.4	2603.46	1111.36	1391.27	1354.45	1595.1	1724.43	1518.57	1734.86	1835.58
YDR524W-C	YDR524W-C	10676.8	8310.69	8479.38	11670.1	8785.22	9319.59	12448.8	11245.2	689.426	1585.61	878.611	1901.55	1841.91	1622.38	1660.45	1810.31
YDR525W	API2	1.92978	1.9417	2.33201	2.06796	0.886488	1.78753	2.33723	2.41287	2.52352	4.89418	2.4001	4.67727	3.97328	3.15297	3.36562	4.44426
YDR525W-A	SNA2	284.721	367.158	392.73	173.02	320.572	368.489	239.439	246.021	274.432	319.992	254.769	319.408	371.596	358.616	334.087	362.895
YDR526C	YDR526C	8.68741	5.63178	5.82438	7.62401	6.17193	2.99783	7.29463	7.11284	48.1627	65.2076	56.1212	76.1781	52.817	55.9189	56.7437	56.1032
YDR527W	RBA50	23.605	22.7173	21.5484	26.8157	21.6698	23.2563	22.8365	21.9384	94.2159	163.544	122.561	181.562	116.19	117.176	114.109	126.14
YDR528W	HLR1	7.08599	5.07257	6.05746	6.95001	5.87957	5.72055	5.27588	5.21515	15.0077	14.5059	18.3923	14.1349	7.66248	9.96378	9.22705	11.0461
YDR529C	QCR7	1305.4	1738.72	1603.95	1119.63	1486.46	1538.46	1238.34	1394.53	1590.72	1818.32	1843.92	2095.26	1982.61	1989.55	1939.34	2083.58
YDR530C	APA2	79.4989	102.263	89.2244	60.4849	86.3894	85.2763	58.4396	78.4135	76.116	93.2561	82.2412	102.132	89.4375	97.2546	85.0692	106.078
YDR531W	CAB1	30.8951	28.4538	30.2853	28.4946	30.038	28.9414	28.7338	26.1064	1.45142	2.87859	2.1079	2.61057	2.0382	1.71283	2.32373	1.73051
YDR532C	KRE28	15.7389	13.7813	13.6148	14.9387	12.0553	10.4809	14.7678	14.2309	5.05847	8.06657	6.27576	9.32309	8.93014	7.16936	8.19268	7.22575
YDR533C	HSP31	100.066	134.647	116.837	99.01	110.196	127.857	92.4816	128.798	98.5554	106.187	115.288	120.847	144.91	132.025	141.798	147.766
YDR534C	FIT1	39.4712	36.3171	30.9103	27.3536	31.0998	31.8223	29.3144	30.8009	6.80476	5.70803	6.42058	5.02701	11.2907	9.51533	8.8577	10.1691
YDR535C	YDR535C	34.1721	19.1865	21.8455	30.257	21.2074	10.7501	27.9883	29.5055	3.07427	3.20704	3.93987	3.77483	9.16716	10.0574	8.20969	11.3562
YDR536W	STL1	395.044	221.342	196.375	316.458	207.477	140.808	283.43	304.024	30.5237	21.3527	36.0051	19.616	18.6133	12.9558	17.7592	12.5219
YDR537C	YDR537C	18.7629	8.05762	9.26474	14.4903	9.78992	6.79505	17.2051	12.5099	1.14603	1.29479	0.812244	1.3463	2.68162	2.54825	2.25708	2.18685
YDR538W	PAD1	19.2346	16.3762	16.8128	22.7823	15.1637	15.6418	24.8084	18.7986	1.76434	1.99798	2.6321	1.60247	5.42953	4.51484	4.86967	4.11573
YDR539W	FDC1	21.4727	23.8652	25.7781	18.1846	23.6802	26.4512	16.7842	19.3381	2.3585	1.67367	2.00968	1.56921	2.38637	1.98053	1.95814	1.65925
YDR540C	IRC4	53.1867	43.3714	36.8801	38.6464	37.6824	36.714	33.5655	45.0657	2.71917	2.03686	2.74234	2.14315	2.80339	2.97034	2.16725	2.67881
YDR541C	YDR541C	17.8808	22.7222	23.9512	15.465	21.6016	26.0984	16.3479	16.1185	0.78347	1.0354	0.774664	1.11207	1.47315	1.17041	1.04998	1.21569
YDR542W	PAU10	1.47261	0.862256	0.950778	0.431894	0.503826	0.645546	0.913238	0.537672	0.0805941	0.130427	0.0948116	0.187472	0.237284	0.111996	0	0.193666
YDR543C	YDR543C	2.61622	2.85795	2.03419	3.48489	3.23413	2.3322	2.57464	3.0325	0.482926	0.441707	0.797071	1.22914	1.39144	1.62388	0.866392	0.930552
YDR544C	YDR544C	5.45795	7.18881	9.66152	4.80938	6.5487	8.06319	6.3959	4.81983	4.39078	8.12525	6.59412	7.13819	4.81252	5.70253	4.5946	5.78586
YDR545C-A	YDR545C-A	0	0	0	0	0	0	0	0	0	0	0	0	0	0	0	0
YDR545W	YRF1-1	0.132109	0.172244	0.292374	0.149292	0.179809	0.258907	0.176847	0.134103	0.124928	0.266315	0.237674	0.346987	0.240669	0.242261	0.289467	0.327925
YEL001C	IRC22	116.748	129.229	135.287	120.044	127.102	146.248	117.312	111.234	8.20078	7.4306	9.90028	8.22454	6.39368	5.15725	6.17261	4.39487
YEL002C	WBP1	98.1167	100.667	108.519	86.4447	99.3502	106.288	84.467	88.233	3.59902	3.21135	3.86856	3.08905	3.89233	2.73114	3.55307	2.68185
YEL003W	GIM4	73.2834	70.0703	70.4247	57.6528	57.9514	81.9239	61.3656	65.6469	2.90312	3.81365	3.60689	3.44453	3.95043	2.10004	3.74092	2.47305
YEL004W	YEA4	17.6669	21.7606	21.9776	12.5301	19.6351	23.4449	14.3341	14.9236	0.541422	0.598509	0.877567	0.615878	0.914401	0.551291	0.646119	0.511608
YEL005C	VAB2	22.9106	29.3029	28.1493	15.0563	24.5388	27.6693	19.4699	18.772	4.81137	3.65515	5.11546	4.57122	6.33754	7.00588	5.54205	6.38417
YEL006W	YEA6	31.2564	38.4302	38.8502	26.5956	37.399	37.6941	29.3179	29.5081	15.2852	19.2717	17.157	20.485	23.158	22.626	20.8505	22.9827
YEL007W	MIT1	32.1122	49.1991	51.8324	22.227	43.8912	55.1582	29.5941	26.1837	8.88677	5.73092	8.69484	6.41938	7.65771	6.5909	7.27216	6.24529
YEL008C-A	YEL008C-A	0	0	0	0	0	0	0	0	0	0	0	0	0	0	0	0
YEL008W	YEL008W	2.66864	2.56495	4.19792	2.09364	3.00216	4.6388	2.22592	2.16866	3.63258	3.69425	3.03871	3.37008	2.23585	1.53316	2.24537	3.38509
YEL009C	GCN4	288.04	360.159	425.304	312.226	352.876	590.891	346.766	276.355	60.2707	37.1769	66.1759	36.6831	61.3862	38.4261	60.163	40.7293
YEL009C-A	YEL009C-A	4.05167	6.48076	6.47285	2.4219	4.74716	5.5242	2.51666	3.29895	0.274996	0.171729	0.288699	0.196527	0.165525	0.792092	0.691479	0.115141
YEL010W	YEL010W	2.71169	6.61834	4.18611	1.69706	3.8401	3.05317	1.28926	2.20936	0	0.384761	0.297312	0	0.337479	0.214268	0.177859	0.190233
YEL011W	GLC3	339.618	398.88	343.157	275.498	330.981	326.731	280.115	320.931	484.065	392.945	502.981	445.952	627.277	479.157	588.74	505.499
YEL012W	UBC8	127.793	117.19	115.295	89.7987	116.013	109.639	93.7707	103.119	279.634	256.998	275.716	261.75	265.853	248.343	245.87	252.243
YEL013W	VAC8	71.4668	75.4067	85.8432	43.7711	73.9867	70.3157	56.4579	56.0858	4.88939	8.63903	5.90505	8.80817	8.68315	8.99775	8.81839	8.58407
YEL014C	YEL014C	20.9744	20.5442	14.3683	13.3672	19.9443	19.3284	16.3661	18.0981	0.994486	2.19049	1.51869	1.49525	1.86364	1.58459	1.35872	1.08671
YEL015W	EDC3	34.5503	34.0801	35.1976	33.805	35.5781	32.6991	32.99	32.9277	4.20679	6.12769	4.70272	5.00025	4.88946	4.80501	5.00043	4.49468
YEL016C	NPP2	13.6974	16.6848	16.2709	12.5412	14.5707	17.1907	11.9693	12.6522	2.8482	3.7531	2.62002	3.05057	3.36093	3.28128	3.04269	2.6654
YEL017C-A	PMP2	2637.52	1872.77	2272.19	2806.44	2063.02	1756.82	2737.74	2568.07	153.83	149.789	166.706	194.13	136.026	158.156	143.285	165.281
YEL017W	GTT3	56.8315	49.8008	52.8552	46.7668	52.3647	39.8963	45.6897	45.0938	8.54873	14.9119	10.6678	13.6363	7.54766	8.41693	7.97032	8.33159
YEL018C-A	YEL018C-A	3.99045	4.75714	4.46491	1.80516	4.8528	4.8341	3.75658	5.34723	1.79542	2.7462	2.38706	2.15181	1.37378	1.65906	1.94435	2.1784
YEL018W	EAF5	20.0197	18.2786	21.0827	17.3138	19.2887	20.1642	17.2356	17.1763	6.37461	10.3201	7.56725	10.6153	5.51358	6.86087	6.70984	7.00006
YEL019C	MMS21	5.01519	4.00335	4.7776	5.54709	5.2241	3.72608	4.20781	4.92739	1.96859	2.84234	2.26565	2.82444	2.47154	1.59919	2.2514	1.90794
YEL020C	YEL020C	20.6253	25.0804	23.7378	15.5053	21.9942	22.0104	16.178	17.7253	4.02632	4.20332	4.01847	4.27356	4.7447	4.46049	4.71095	4.50761
YEL020C-B	YEL020C-B	140.081	135.987	134.834	157.134	153.034	149.365	144.676	148.741	19.5843	32.6783	19.599	36.9412	27.4581	30.9977	22.2039	37.5375
YEL020W-A	TIM9	245.972	267.199	256.091	277.676	260.883	295.23	269.047	273.502	39.044	74.7057	53.3173	78.0037	42.6787	58.5776	48.1295	65.2083
YEL021W	URA3	31.7834	32.4465	34.5898	29.4223	38.3363	53.3826	31.5081	28.3973	2.72251	2.29473	2.24365	1.41222	3.35031	2.75988	2.88709	2.50263
YEL022W	GEA2	9.42813	9.48235	10.6767	8.76318	9.74411	11.9636	8.97018	7.83436	0.464806	0.606994	0.558321	0.517202	0.625475	0.483298	0.541186	0.30509
YEL023C	YEL023C	7.20913	7.24803	6.75047	4.58285	5.55919	6.26786	5.99966	5.34365	0.623083	1.20617	0.915218	0.90813	1.11909	0.901851	0.977949	0.817474
YEL024W	RIP1	300.651	389.391	405.237	209.536	340.205	294.667	252.075	267.197	413.359	648.922	541.569	755.459	762.966	738.218	735.154	811.903
YEL025C	YEL025C	12.6913	13.4759	12.765	7.98384	13.272	12.0945	10.4762	9.70431	1.19507	1.50879	1.49077	1.94597	1.82359	1.73015	1.86765	1.68324
YEL026W	SNU13	224.902	185.816	201.387	331.652	234.862	238.845	314.26	271.674	16.87	25.9352	18.8141	24.1766	15.0122	12.1886	13.9368	16.0424
YEL027W	VMA3	696.625	823	863.934	620.41	775.776	1000.32	633.676	670.123	83.9017	111.875	97.245	106.017	83.3653	88.7432	83.6765	93.3084
YEL028W	YEL028W	9.81683	8.9989	8.79444	8.53203	8.47126	9.91922	8.11435	7.37281	1.48999	2.00412	0.947827	1.3479	2.05848	1.28962	1.47941	1.29069
YEL029C	BUD16	8.76154	8.22617	9.47737	11.1573	9.29674	10.4105	10.6317	10.3336	1.45111	2.43447	2.05064	2.60358	2.8349	2.16698	2.84176	2.18454
YEL030C-A	YEL030C-A	5.00828	4.62528	4.23441	2.42882	2.63964	3.07613	4.08791	2.66725	0.777253	3.01564	1.6665	2.99808	3.07564	3.62021	2.34844	4.4268
YEL030W	ECM10	4.95264	5.24351	5.99994	4.22052	5.07841	5.42777	4.17195	4.33124	3.62499	5.3051	4.06712	5.42056	6.47374	6.2069	6.01801	6.21687
YEL031W	SPF1	43.4665	44.3506	47.7455	45.0399	47.2417	56.6688	38.8267	39.5031	9.22704	14.7853	12.7105	16.7264	11.3986	11.253	10.6929	12.0441
YEL032C-A	YEL032C-A	0	0	0	0	0	0	0	0	0	0	0	0	0	0	0	0
YEL032W	MCM3	18.4422	17.4458	19.5758	17.5372	17.5613	17.4803	15.7518	15.6716	21.4652	31.4216	27.3678	31.5094	37.05	31.1577	34.641	32.6314
YEL033W	MTC7	232.713	231.373	207.619	269.763	222.29	254.115	256.847	204.536	54.7447	140.882	79.7128	155.605	124.242	114.385	102.997	125.534
YEL034C-A	YEL034C-A	1652.27	1405.88	1508.52	1853.96	1472.16	1285.1	1600.04	1534.42	831.725	1332.65	983.814	1419.71	1061.77	1177.16	1116.1	1290.71
YEL034W	HYP2	0	0	0	0	0	0	0	0	0	0	0	0	0	0	0	0
YEL035C	UTR5	7.89043	12.2769	13.5618	3.96002	10.4164	14.9659	5.07695	6.36764	23.1968	23.1893	23.5135	23.7002	18.8031	17.8852	17.2756	17.9133
YEL036C	ANP1	33.8222	32.8034	31.3192	38.0913	29.9639	34.9851	29.3454	32.7997	19.0977	32.735	24.6024	30.098	17.5224	20.1199	17.3933	20.2923
YEL037C	RAD23	103.39	134.376	125.522	112.493	121.875	150.987	94.124	108.398	69.7781	102.174	91.6443	108.718	54.0767	66.6738	55.1133	68.3773
YEL038W	UTR4	104.87	155.672	141.344	81.2574	131.578	138.368	84.4301	100.906	232.321	246.078	246.212	255.405	207.24	196.348	192.592	202.982
YEL039C	CYC7	1450.56	1316.49	1122.27	1075.2	1099.62	630.853	1041.34	1307.72	2513.55	3388.8	2799.74	3556.18	3916.34	3660.28	3641.64	3679.96
YEL040W	UTR2	49.5863	38.7139	51.7484	75.4584	46.493	85.2946	72.6756	45.3286	12.004	13.0447	10.326	11.7715	10.2208	10.0581	9.22564	9.51929
YEL041W	YEF1	13.6936	18.349	18.7463	8.7811	16.2253	16.9525	11.1587	13.4738	5.75122	4.68276	6.93377	5.84178	6.85072	6.56972	5.80215	7.41244
YEL042W	GDA1	37.7969	38.3573	45.2092	48.2868	42.123	49.6175	43.5157	40.811	8.39003	11.3857	8.51387	10.8848	14.1712	13.1895	14.2108	12.2322
YEL043W	YEL043W	26.0538	29.3912	32.8307	24.6954	29.7624	32.0577	23.6785	22.6642	9.26315	16.1046	11.5219	15.9181	20.6967	18.6845	19.067	18.6906
YEL044W	IES6	84.2437	92.9712	88.555	94.4835	92.9979	106.237	86.894	89.3992	71.1075	91.8693	79.0488	99.149	115.267	103.447	107.985	110.711
YEL045C	YEL045C	6.73657	5.30671	5.84954	7.06801	4.13451	4.32074	5.20763	5.55324	2.92414	3.34309	2.31496	3.05828	3.20134	3.57299	4.58253	3.05903
YEL046C	GLY1	91.8068	51.0436	58.4617	144.221	62.169	52.1836	98.1306	90.7755	36.2256	43.0146	46.3914	44.4147	51.0798	42.1153	52.5174	47.9539
YEL047C	FRD1	39.7927	38.6808	49.0386	35.0708	42.9686	40.6607	37.0962	35.8601	1.43349	1.11045	1.37135	1.18935	0.731832	0.774136	1.05681	1.02199
YEL048C	TCA17	10.5978	7.25762	9.21959	10.7368	8.38602	7.69322	10.732	10.9949	0.410509	0.281108	0.33512	0.272293	0.950304	0.509881	0.229867	0.271611
YEL049W	PAU2	3.42248	3.23581	3.95069	2.8279	3.01616	5.24145	2.04243	3.38646	2.00376	1.7244	1.9421	0.929105	2.43471	4.62466	2.33774	4.95192
YEL050C	RML2	42.1449	53.1304	55.6405	40.4684	48.6611	65.8644	37.3016	39.2334	22.5396	36.3146	27.9178	36.4631	29.3087	29.0496	27.6314	28.2519
YEL050W-A	YEL050W-A	105.997	160.104	152.842	101.338	133.822	177.47	104.338	121.321	11.6614	55.2835	17.9058	61.275	40.4768	44.2693	25.1234	36.3729
YEL051W	VMA8	146.788	152.879	170.916	152.738	161.129	181.505	147.161	144.709	17.9139	26.968	21.7844	30.8952	20.8759	23.0534	23.2956	23.425
YEL052W	AFG1	47.0827	59.8072	60.542	32.0118	55.3478	53.8416	37.8262	39.1465	14.5409	21.9852	17.807	24.9659	36.5335	36.1717	31.3378	38.5908
YEL053C	MAK10	9.95406	11.9837	12.9466	8.33416	10.6129	14.1335	8.58435	9.17924	0.667882	0.836768	0.729408	1.05393	1.69926	1.53938	1.62635	1.8665
YEL053W-A	YEL053W-A	163.779	156.869	178.693	246.354	188.61	168.03	217.076	208.738	2.90102	1.82437	3.06409	1.56262	0.352397	0.787155	1.82293	0.429261
YEL054C	RPL12A	560.594	512.087	556.824	711.076	580.786	646.28	721.986	632.57	5.58413	4.48868	8.17818	4.62853	1.42978	1.47975	1.51477	1.72646
YEL055C	POL5	14.382	15.416	15.6263	16.3989	14.8974	21.3117	14.4883	15.5739	0.762091	0.834713	1.13387	0.872879	1.35554	0.954879	1.49556	0.810663
YEL056W	HAT2	42.2774	44.3702	48.2164	38.3316	44.0168	47.6087	41.4961	38.2102	3.49009	4.8418	4.78584	4.84979	5.28	4.96167	6.82344	6.46625
YEL057C	YEL057C	10.6906	10.5021	11.7161	5.48687	9.63928	8.17033	7.96392	8.37634	0.798182	0.775126	0.759649	0.899778	0.914652	1.04616	1.32426	1.1524
YEL058W	PCM1	69.2888	81.982	80.8323	65.2131	79.7686	111.458	64.8199	67.1141	15.0165	19.1493	15.4265	18.2227	20.3958	20.3552	19.2476	20.4527
YEL059C-A	SOM1	47.367	61.0157	58.8039	40.7587	55.3892	70.8895	32.9511	41.3992	19.5448	24.8655	19.0628	28.2757	28.0422	28.7653	30.937	33.2088
YEL059W	HHY1	14.4872	8.72817	10.3404	11.2152	12.2945	11.2767	11.5423	11.1785	12.7861	15.182	14.4538	15.2119	15.1122	17.1115	15.4682	14.3
YEL060C	PRB1	509.68	552.577	605.734	295.836	542.93	438.208	364.189	404.025	843.486	1087.4	873.302	1089.82	1408.01	1339.59	1376.46	1351.04
YEL061C	CIN8	5.93769	4.12812	5.0461	4.74255	4.84085	3.75337	4.66646	4.48645	2.07173	2.07342	1.90086	2.24145	1.9815	1.74738	1.91146	1.84163
YEL062W	NPR2	13.2403	12.473	13.4504	9.18229	11.9591	12.2594	10.8082	10.6946	1.01474	1.54852	1.26628	1.41925	1.95204	1.87452	1.79793	1.67223
YEL063C	CAN1	65.7428	62.3564	62.4591	44.9478	62.8558	47.9625	48.5015	47.9247	27.334	28.5064	29.0986	29.2358	27.2912	25.8977	25.6627	24.6058
YEL064C	AVT2	9.36188	8.28421	8.69862	6.53525	8.84951	7.91884	8.07577	7.81657	1.1595	1.86837	1.76716	1.98207	3.0236	2.76715	2.63287	2.90735
YEL065W	SIT1	5.19346	8.02711	13.1303	3.59916	9.74213	8.56596	7.25869	5.10676	23.3518	14.2036	23.0496	15.3803	4.54009	4.35658	4.4175	4.28178
YEL066W	HPA3	30.9932	45.562	43.2803	32.2065	40.248	51.3993	30.8309	33.792	3.04118	3.14385	3.78367	2.68909	4.47252	5.44074	4.32625	4.80486
YEL067C	YEL067C	4.71313	7.11286	8.04341	3.39692	6.23719	7.97103	5.19148	4.88482	1.20486	0.550182	1.4741	0.960839	0.716002	0.873737	0.96818	0.677378
YEL068C	YEL068C	28.5668	37.8627	43.3086	26.9455	34.0198	43.2925	34.3736	29.3516	4.735	2.36117	4.96811	3.40657	2.70776	2.52161	4.57955	3.53591
YEL069C	HXT13	109.18	228.478	185.959	67.6274	135.579	280.273	99.6696	124.816	23.747	16.3973	20.2122	17.909	23.1561	16.1849	20.3288	18.9231
YEL070W	DSF1	328.057	724.533	698.167	184.462	486.628	1264.83	318.888	371.024	250.801	127.878	196.81	143.18	194.117	116.052	153.525	121.76
YEL071W	DLD3	200.572	136.677	133.982	164.218	151.621	130.609	182.591	165.041	71.6064	84.2884	74.184	85.4452	96.1569	85.7674	95.761	88.3315
YEL072W	RMD6	11.2971	10.7771	9.91384	10.2388	8.89715	18.2142	9.6431	6.82643	4.21285	7.11727	4.50368	7.43097	4.2284	4.38829	4.81494	3.88534
YEL073C	YEL073C	122.008	185.381	201.69	154.98	142.127	173.217	177.134	221.589	53.799	63.4901	56.7628	61.8202	62.8261	82.9265	67.7052	85.8455
YEL074W	YEL074W	15.4132	19.7908	28.7515	18.5647	18.0313	26.7544	18.6944	21.898	8.35054	8.97513	12.7811	11.5137	9.23863	11.74	15.3014	19.1933
YEL075C	YEL075C	0	0	0	0	0	0	0	0	0	0	0	0	0	0	0	0
YEL075W-A	YEL075W-A	0	0	0	0	0	0	0	0	0	0	0	0	0	0	0	0
YEL076C	YEL076C	0.965069	0.664859	1.39241	1.11412	1.2914	1.32094	1.60509	1.27789	1.63588	2.27685	1.87773	3.09378	2.3153	2.59446	2.98465	3.03518
YEL076C-A	YEL076C-A	0	0	0	0	0	0	0	0	0	0	0	0	0	0	0	0
YEL077C	YEL077C	12.4832	17.6649	21.3768	13.4706	16.91	22.0524	14.5645	11.9542	4.69528	5.56156	5.13388	5.43846	5.44722	5.57941	5.97547	5.71422
YEL077W-A	YEL077W-A	0	0	0	0	0	0	0	0	0	0	0	0	0	0	0	0
YER001W	MNN1	17.2874	13.3862	16.4727	26.0963	15.6367	14.3514	19.8629	15.7637	4.77853	4.00481	4.71169	4.51436	5.80734	4.80493	6.4775	5.10312
YER002W	NOP16	46.5261	34.0041	29.3726	57.0559	41.6463	28.8317	55.9055	52.6498	37.4364	58.9448	43.5797	54.8678	49.0231	46.1859	46.2043	42.7686
YER003C	PMI40	88.6001	63.5129	63.8094	89.0105	70.6012	56.5396	73.3481	79.3937	3.62051	5.46046	4.70207	5.5923	5.63549	5.18562	6.20817	4.94393
YER004W	FMP52	47.0464	61.8611	63.1719	39.5483	57.9735	71.2574	38.6131	44.058	43.4151	68.539	51.8188	78.374	80.8352	91.5316	85.0746	99.7337
YER005W	YND1	26.2478	32.4483	32.6061	21.6275	30.2387	32.6063	23.542	24.4076	8.74771	11.4376	10.6206	12.0486	14.6202	15.8616	14.126	16.4033
YER006C-A	YER006C-A	1.68989	0.426035	1.76898	0.43666	1.79792	0.757974	0.78553	1.57792	0.118553	0	0	0.350162	0.232871	0	0.105666	0.303528
YER006W	NUG1	45.8787	39.6328	38.5067	65.9091	47.9181	46.8457	58.2308	59.8996	3.73302	7.82473	4.73523	6.75221	10.4038	8.56774	8.38102	6.83263
YER007C-A	TMA20	61.4143	55.9489	65.2859	73.838	67.3648	72.2076	76.9788	64.416	2.18323	1.74361	3.03173	2.48954	3.35725	1.4833	2.22192	2.21762
YER007W	PAC2	6.82083	6.97921	8.01075	5.60731	7.3429	8.31466	6.34389	6.08915	1.05086	1.09178	0.947105	1.02578	1.42418	1.19904	1.2146	1.22096
YER008C	SEC3	31.55	41.6154	39.8485	25.9273	36.9936	45.8096	27.6502	29.1472	5.63153	9.11703	5.9262	9.50552	8.68257	8.31102	7.72382	8.4909
YER009W	NTF2	401.829	357.603	389.485	421.658	395.866	404.855	445.93	422.779	10.2335	17.2594	14.2177	17.8871	20.1489	17.9491	17.5719	17.2281
YER010C	YER010C	29.8441	41.6966	40.6619	23.7844	35.3634	45.2541	28.3548	27.9536	10.5416	10.9151	12.1907	13.6009	15.0406	14.7173	13.1688	14.8969
YER011W	TIR1	3.83833	9.28786	3.58494	12.5452	2.84573	12.4182	3.3029	15.8063	0.780874	1.66584	0.632678	2.63161	0.409402	1.64963	0.677096	1.16198
YER012W	PRE1	134.269	161.347	157.79	107.066	152.594	195.971	110.257	123.784	34.2734	54.462	46.4133	59.7422	30.0321	34.323	30.6586	39.1242
YER013W	PRP22	13.6965	14.6783	13.9121	13.1987	13.9865	13.6777	10.6001	12.7317	4.33758	8.8167	5.7317	8.68249	7.3616	6.90511	6.68091	6.61063
YER014C-A	BUD25	3.33159	7.06615	5.81125	4.22655	4.11025	5.75915	0.625888	3.89908	0.0872335	0.398213	1.19093	1.62539	0.908485	0.175861	0.558163	0.631305
YER014W	HEM14	18.5882	21.6745	24.7204	12.1382	22.2354	25.2682	16.0454	13.9961	2.48639	1.99559	1.98429	1.71741	2.38508	1.95481	2.62825	2.1114
YER015W	FAA2	37.6019	33.5618	35.7617	31.5472	33.1895	26.0093	37.5131	30.688	36.3146	40.4538	46.6412	58.5477	71.1994	75.5476	66.621	93.4714
YER016W	BIM1	21.7044	25.7755	28.8478	22.7216	26.93	30.782	25.7878	21.1525	2.38113	3.52801	2.84044	2.55776	2.30053	1.86889	2.37218	2.01406
YER017C	AFG3	57.676	61.5185	66.9546	48.5569	58.7709	57.1651	43.0792	48.6614	96.5423	122.639	98.405	118.711	77.8969	81.1377	77.0431	79.181
YER018C	SPC25	53.3565	59.5752	56.938	43.8387	55.5008	49.8276	43.6226	47.2461	23.4032	31.8258	22.1027	27.9304	21.2847	23.9381	19.0301	24.7266
YER019C-A	SBH2	481.955	534.441	541.187	499.601	530.211	573.652	490.229	509.987	158.71	312.017	176.389	329.101	222.48	306.468	238.971	309.005
YER019W	ISC1	43.7199	44.5509	47.4761	35.108	45.351	42.4164	35.0167	36.4981	11.0989	13.579	11.1537	12.2182	8.1662	8.70909	8.76748	8.42446
YER020W	GPA2	116.933	115.554	121.012	83.7404	114.746	98.9811	98.8873	95.4195	223.206	282.251	224.31	303.5	299.032	306.633	332.233	338.335
YER021W	RPN3	133.718	163.035	159.122	101.461	143.703	168.32	100.554	118.168	25.6031	49.6161	37.3201	56.3103	32.3102	37.1554	30.1612	35.6994
YER022W	SRB4	18.2633	16.998	18.037	15.8151	18.7569	16.1651	17.1634	16.4708	0.737569	1.01188	0.826777	0.858465	1.05474	0.87749	1.02363	0.769615
YER023C-A	YER023C-A	0	0	0	0	0	0	0	0	0	0	0	0	0	0	0	0
YER023W	PRO3	208.787	234.177	243.773	207.404	239.006	243.871	210.805	199.782	14.261	18.8719	14.1319	16.743	20.7279	19.0896	18.1382	19.8643
YER024W	YAT2	24.6962	21.7249	22.7579	13.7398	23.6499	16.6335	19.7276	17.041	53.2475	51.1725	60.7022	46.3775	165.152	89.4275	156.276	80.0841
YER025W	GCD11	83.2679	85.417	94.8768	92.2992	91.6992	105.022	82.0787	85.1534	26.6183	44.4306	30.2634	42.5867	37.2241	34.3027	35.7798	33.9987
YER026C	CHO1	554.085	534.187	601.217	514.68	564.214	592.279	520.41	493.478	182.252	363.493	223.253	401.401	300.657	310.489	277.389	307.636
YER027C	GAL83	53.7279	65.149	65.8002	45.4683	58.4147	68.5728	47.4358	49.7744	11.7367	18.0711	14.7411	20.1895	18.8194	17.4599	19.1011	18.3933
YER028C	MIG3	8.11836	9.56188	7.76981	7.15944	7.92966	7.61758	5.33446	7.35594	16.7238	11.9767	14.3511	13.2197	22.2429	12.7501	22.5172	14.3136
YER029C	SMB1	96.4505	86.4376	80.2821	91.2164	90.3477	73.7118	90.8323	91.979	19.9917	20.293	19.2376	18.5433	16.4204	16.9779	16.1414	15.1329
YER030W	CHZ1	121.702	151.516	140.462	117.77	142.91	168.627	118.174	120.256	28.5807	32.9566	30.9465	34.1828	33.8767	35.3804	33.1729	36.5694
YER031C	YPT31	76.7871	91.1901	107.868	79.7545	94.654	121.274	84.1366	78.4808	5.49704	6.17204	6.29942	6.22529	5.95025	5.67601	7.41485	5.66915
YER032W	FIR1	4.17017	4.96005	5.29942	4.26167	4.83268	5.99848	4.55011	3.63738	0.524512	0.467682	0.573969	0.484449	0.68408	0.436789	0.678491	0.420231
YER033C	ZRG8	9.92048	13.9712	13.142	6.90737	12.3252	16.335	8.11158	8.42741	13.7443	15.9438	15.9533	17.4783	19.4196	18.24	19.5004	18.2924
YER034W	YER034W	30.5828	24.7677	29.4146	28.9356	26.7869	27.7592	26.8285	28.1322	34.0678	32.8874	35.484	30.3196	20.1567	20.6299	20.8961	19.1787
YER035W	EDC2	278.218	178.367	173.725	367.384	177.467	132.39	251.247	243.05	1026.42	899.124	1008.48	823.184	831.6	647.827	809.62	616.707
YER036C	ARB1	115.672	90.7213	100.714	163.179	100.028	103.697	119.739	119.662	314.412	343.342	370.992	362.247	254.149	240.343	257.381	257.794
YER037W	PHM8	36.0002	25.5908	29.4108	45.0315	24.9425	18.2055	30.3201	32.4269	84.3708	76.4725	89.8243	76.3051	42.977	45.8852	43.6164	45.8335
YER038C	KRE29	5.67354	5.03149	4.50039	4.80748	3.62142	4.07592	5.05397	5.33423	2.30119	4.23518	3.12508	4.17111	3.35567	3.50166	3.16189	3.34155
YER038W-A	YER038W-A	28.3528	28.3113	22.4646	17.8825	21.7817	23.5985	18.465	21.9808	26.5959	55.1507	32.1336	54.6314	31.537	36.626	30.0027	37.0257
YER039C	HVG1	18.2758	17.9611	18.6831	14.1481	18.4751	14.2797	14.7926	17.4316	27.8756	45.4847	34.1308	46.9064	32.4823	30.3591	33.7264	33.62
YER039C-A	YER039C-A	43.7352	41.7921	39.0105	27.7982	35.3054	23.1267	37.8815	34.3904	66.9786	99.1106	76.9881	104.605	74.2135	72.6072	72.4528	83.9499
YER040W	GLN3	15.9554	13.6568	16.4554	12.9642	15.0597	12.5726	13.4201	13.2893	18.9154	33.3307	22.8573	33.8275	27.326	26.8659	25.8038	27.456
YER041W	YEN1	9.18103	8.95894	9.3305	6.64953	8.43658	8.32944	8.21563	7.37773	3.43679	6.34486	3.8106	6.01421	5.00957	5.31958	4.95473	5.39972
YER042W	MXR1	199.215	90.9132	164.925	77.7246	173.788	198.36	149.001	84.9076	23.3564	55.0303	32.4718	60.7736	71.0823	85.7243	72.1989	102.239
YER043C	SAH1	703.225	601.251	703.917	900.85	689.28	788.114	697.081	687.127	26.4458	35.306	33.186	37.2755	35.0521	32.5129	35.8461	36.367
YER044C	ERG28	329.481	318.165	345.188	360.47	308.473	339.259	339.498	323.087	24.7647	43.6768	27.4344	49.7535	56.9841	65.926	63.6918	73.8064
YER044C-A	MEI4	1.21319	1.00732	1.69343	1.1881	1.03732	0.842417	1.20489	1.02238	0.100614	0.220027	0.211424	0.151886	0.132286	0.123499	0.175171	0.118736
YER045C	ACA1	12.5256	16.9333	17.2025	10.9777	13.2864	22.9576	10.711	9.13937	3.96899	3.72356	4.55741	3.83277	2.67845	2.18268	2.1767	1.89389
YER046W	SPO73	45.1925	55.0075	54.4212	33.6326	46.0766	45.9575	34.974	34.3234	13.1446	8.32983	11.9496	7.17932	8.35297	8.10733	7.76507	7.59744
YER046W-A	YER046W-A	21.2019	33.8518	31.7629	12.9633	23.5588	36.4222	21.5677	17.9353	6.82444	14.2162	6.4624	12.702	11.4863	14.3248	10.8908	12.6879
YER047C	SAP1	15.5225	15.9699	18.4966	11.1634	16.562	17.5293	14.0693	12.2893	6.79865	11.2085	6.75974	12.4941	10.9941	12.7543	10.8725	13.9298
YER048C	CAJ1	60.6824	89.6352	90.1064	47.3715	79.9805	104.127	55.1769	58.1434	24.4839	50.049	30.3744	53.8593	69.2848	73.6023	66.1296	77.2783
YER048W-A	ISD11	213.234	225.671	252.338	170.667	241.541	252.314	193.106	211.935	103.057	167.849	118.985	178.799	110.475	149.947	118.866	153.738
YER049W	TPA1	15.3419	11.8003	12.2661	24.9765	13.2485	15.3643	21.0491	19.2007	3.31642	5.63522	3.84155	5.41643	7.09706	6.85999	8.72895	6.84726
YER050C	RSM18	112.851	131.226	136.499	92.6746	128.255	137.882	97.2694	101.287	90.2573	143.642	108.467	157.807	100.803	115.235	105.312	113.005
YER051W	JHD1	14.3664	14.6424	15.2555	10.5247	13.2332	13.1643	11.9159	11.7334	13.8367	27.4372	17.6882	28.6965	21.2943	21.5517	21.103	20.893
YER052C	HOM3	34.0535	26.0248	31.694	37.0537	32.2763	27.9263	38.2754	31.3557	9.36814	4.95504	9.19168	5.90186	7.88552	4.10479	7.93519	4.05856
YER053C	PIC2	168.47	208.794	200.776	126.781	180.306	164.754	146.039	163.67	39.3776	20.5579	36.7576	22.9347	33.5588	28.2232	30.9068	29.3266
YER053C-A	YER053C-A	3408.19	1952.56	2268.75	2757.22	2058.26	1026.93	3010.31	2969.93	1394.93	2295.55	1861.99	2893.22	5967.35	6744.48	6377.37	7946.5
YER054C	GIP2	59.0568	65.5806	60.0899	40.0069	53.9874	50.8076	48.7775	55.1984	65.386	77.0435	74.6982	86.0099	115.25	97.7578	110.769	101.015
YER055C	HIS1	136.972	120.025	119.587	174.983	134.035	106.379	171.918	148.976	54.506	64.9479	59.722	70.7571	62.5756	57.7383	58.6088	57.2807
YER056C	FCY2	13.509	12.472	14.3452	19.0569	12.385	16.2287	15.1033	13.2229	37.4173	43.2107	40.4664	47.8944	36.3018	38.8604	40.4331	43.8904
YER056C-A	RPL34A	392.717	382.265	423.069	532.017	425.641	534.779	550.211	417.813	10.3615	12.4033	12.0745	12.3044	7.48927	5.1999	4.82305	6.0358
YER057C	HMF1	219.398	259.637	266.256	213.09	263.973	287.211	223.022	240.853	17.5869	23.8873	17.9705	25.7238	21.8239	26.2343	22.9365	27.1086
YER058W	PET117	72.3509	121.582	123.966	60.9118	99.8403	155.469	64.0098	71.8063	36.1106	61.3111	37.4429	61.2406	42.305	48.9001	46.4323	56.6111
YER059W	PCL6	34.2838	38.8913	38.2823	29.9688	36.4796	36.4491	32.8499	31.9617	1.11902	1.64184	1.27797	1.55728	1.83934	1.97041	2.15627	1.86578
YER060W	FCY21	9.66586	12.9154	11.5602	11.4495	10.7194	15.3956	9.2564	10.4793	16.6412	35.379	20.85	42.2341	38.2381	43.6677	42.737	50.1466
YER060W-A	FCY22	3.93729	5.78743	5.7495	3.6938	4.69583	7.54078	3.29984	3.79951	16.0693	26.6764	20.0803	32.1829	28.5744	33.4258	34.925	38.6392
YER061C	CEM1	10.0531	14.1163	13.6459	15.065	11.3749	13.2864	10.3035	14.112	77.3655	109.13	97.8987	141.865	73.6912	103.506	89.6068	126.374
YER062C	GPP2	425.609	350.753	360.379	430.424	370.029	368.507	335.1	373.274	127.07	165.634	164.042	196.446	128.694	153.028	152.008	183.693
YER063W	THO1	167.325	183.748	178.723	148.117	176.881	187.193	142.218	156.185	27.1844	47.2188	31.5757	47.7485	37.0725	42.0407	38.5172	43.5258
YER064C	VHR2	16.6839	32.8585	38.4857	22.687	28.7521	42.3706	15.8445	23.8076	4.28168	12.3797	7.04927	13.476	14.7611	15.6768	13.4962	16.8442
YER065C	ICL1	24.8759	27.1503	28.1868	19.9392	25.0758	20.7385	20.316	20.5476	207.543	150.77	235.755	132.714	459.603	159.08	423.447	131.369
YER066C-A	YER066C-A	213.918	217.118	233.717	141.998	215.826	204.339	189.566	181.721	17.5202	14.7038	19.9871	18.161	17.2451	14.2624	15.661	14.1651
YER066W	RRT13	41.3236	43.8128	42.5935	29.3582	40.3604	35.956	33.3698	37.3835	34.2699	28.0416	36.8833	27.9207	17.6254	22.0427	16.7507	21.8542
YER067C-A	YER067C-A	1697.95	2097.59	2100.15	1129.13	1910.41	2147.03	1482.41	1715.08	204.702	123.482	221.641	144.576	124.102	112.135	119.302	118.804
YER067W	RGI1	1038.06	946.121	1110.47	680.762	956.426	877.998	936.37	861.658	129.554	66.072	137.462	75.926	94.3026	75.2781	77.7622	76.5516
YER068C-A	YER068C-A	8.90294	7.1172	9.13928	6.27775	8.93062	4.97404	6.79885	8.4834	7.75506	9.64317	11.4226	11.7965	10.7216	11.3402	12.5907	12.6721
YER068W	MOT2	78.8398	63.7748	71.53	65.812	70.5449	52.6618	64.1814	66.7732	25.5104	43.3864	27.4913	39.9169	35.421	34.0405	34.0114	33.6063
YER069W	ARG5	22.4668	19.9747	24.0316	19.0835	22.3805	23.3091	20.7644	17.9186	21.7489	28.2752	23.588	32.4593	28.8793	25.9855	30.428	28.9015
YER070W	RNR1	10.4996	6.03687	8.46308	14.6638	8.0083	6.20347	12.006	8.12635	0.394379	0.594572	0.470485	0.477483	0.287957	0.319601	0.405287	0.213359
YER071C	TDA2	36.5327	34.4843	40.5042	30.0723	36.7188	46.388	30.8594	31.6427	4.37142	10.4042	5.75415	11.0626	9.58222	10.8854	7.8975	8.75709
YER072W	VTC1	166.052	182.478	222.298	144.685	201.672	218.496	172.079	157.539	68.5119	97.219	75.7995	102.895	99.6676	98.9681	94.3525	109.425
YER073W	ALD5	25.2235	22.2861	25.6827	33.0876	26.7862	24.9294	29.2294	21.718	3.37022	3.76304	3.43104	3.68197	3.45536	2.8208	4.42634	3.14053
YER074W	RPS24A	804.759	607.984	755.39	1064.39	778.688	836.558	1085.2	816.02	18.9438	17.5023	22.6605	18.8835	7.49458	6.27578	8.46175	7.84944
YER074W-A	YOS1	192.019	225.979	235.041	177.349	223.137	263.796	193.186	193.158	21.2417	28.2168	21.719	32.3144	20.9349	30.4961	24.0751	30.6078
YER075C	PTP3	14.922	14.7446	17.1643	10.8738	14.5774	15.0943	13.5846	12.448	3.32575	5.89064	4.25416	5.86178	8.63896	7.61073	8.1471	7.54995
YER076C	YER076C	14.4854	16.4894	16.4034	10.4338	14.5273	16.5005	11.8631	11.9669	1.33012	0.918792	1.41611	0.86667	1.06165	1.43724	1.29633	1.76354
YER076W-A	YER076W-A	12.2952	12.9287	12.396	8.34326	9.96479	11.6672	8.7999	11.4888	0.431002	0.61322	0.603381	0.341371	0.650704	0.358698	0.270833	0.172005
YER077C	YER077C	9.84756	11.8539	12.7995	10.4688	11.9986	18.1555	11.1826	10.767	0.687311	0.71159	0.596993	0.678901	0.89604	0.893278	0.826495	0.983217
YER078C	ICP55	48.821	60.5939	61.6382	43.6912	56.0537	53.4168	43.3048	48.3962	2.42422	2.13167	3.27367	2.74224	2.57525	2.43505	2.92274	2.91573
YER078W-A	YER078W-A	21.0667	15.2981	20.9337	12.0598	16.8906	18.3581	9.48475	16.4676	4.4195	3.33004	3.94045	6.91027	7.05005	3.55671	7.0005	5.02388
YER079C-A	YER079C-A	19.3223	18.5025	33.4864	13.782	23.0489	24.164	15.3872	19.1975	5.62196	7.01016	6.69054	6.45929	4.83285	7.75546	8.55314	8.12517
YER079W	YER079W	202.914	206.432	187.93	162.115	179.74	139.595	163.384	185.672	154.873	93.9205	159.186	103.296	113.234	105.6	108.966	119.293
YER080W	AIM9	43.0034	49.766	56.4043	33.4012	49.5868	52.2759	36.4525	37.6142	9.87451	14.087	11.8932	16.0984	15.2619	16.1868	15.4041	18.2713
YER081W	SER3	69.221	113.838	89.9953	144.239	82.9492	98.1459	60.0734	100.945	29.0797	59.5567	38.5355	95.7891	43.6891	65.948	63.1135	95.0476
YER082C	UTP7	15.1014	16.5197	16.4903	18.3645	15.3061	18.3062	16.034	17.8725	2.8025	3.38512	3.18798	3.32428	4.3917	3.31486	4.26035	4.0376
YER083C	GET2	44.7346	55.1322	63.0233	40.9018	56.6541	63.528	46.5117	43.546	9.97979	18.6166	13.6864	22.7925	20.1337	20.4087	19.9995	23.5352
YER084W	YER084W	10.4841	13.9797	11.6028	5.37928	10.2358	6.83334	9.6518	7.67783	66.7567	99.4504	70.9844	116.995	146.464	146.65	155.693	159.95
YER084W-A	YER084W-A	1.53797	2.61014	1.43433	0.729651	1.73156	1.05746	0.846364	1.15541	1.16285	2.50846	1.25283	2.25443	2.54548	2.42912	3.43893	2.07309
YER085C	YER085C	1.23386	0.648352	0.878199	0.686329	0.710809	0.755159	0.582851	0.769427	0.0692885	0.063763	0.120445	0.186606	0.216383	0.195235	0.0616137	0.124967
YER086W	ILV1	19.7152	17.75	24.6166	26.6274	21.7335	30.9957	26.2156	20.2207	4.25204	5.39738	4.81738	6.03887	7.14587	5.33591	7.65392	5.98578
YER087C-A	YER087C-A	18.8986	29.0638	28.1702	17.1281	22.7177	32.4568	18.4738	16.697	4.65388	1.63519	4.42736	1.20149	1.65134	0.87938	1.14544	1.32024
YER087C-B	SBH1	359.972	312.869	351.305	348.627	332.332	330.946	355.066	348.643	31.4676	38.0542	31.9673	39.8772	38.7979	34.2272	39.2983	36.3684
YER087W	AIM10	12.0497	15.5978	19.4116	9.08066	15.9203	19.1429	10.6457	10.2971	1.65952	0.724296	1.59714	0.784044	0.768767	0.652857	0.807707	0.65225
YER088C	DOT6	71.5484	79.1962	83.0361	57.677	81.9182	76.4775	63.0448	58.7033	128.983	116.182	132.261	128.879	127.73	128.341	127.773	139.35
YER088C-A	YER088C-A	58.7409	98.7828	87.2411	47.8351	80.4681	108.752	58.5761	62.1006	10.1892	12.7368	9.40348	11.7845	13.9883	14.0588	14.2161	11.135
YER088W-B	YER088W-B	7.8246	10.5941	8.50915	14.1488	9.14075	15.6073	7.7062	10.4328	0.549131	0.707392	1.15697	0	1.1759	0.924233	0	1.44646
YER089C	PTC2	77.5572	103.532	110.232	74.2077	102.681	127.874	78.0079	76.7254	6.67149	8.08882	7.68969	7.71263	6.39276	6.72577	7.01115	7.36394
YER090C-A	YER090C-A	0	0	0	0	0	0	0	0	0	0	0	0	0	0	0	0
YER090W	TRP2	50.9897	55.051	59.811	54.5575	57.1943	68.2274	51.4058	51.9682	3.99754	5.02592	4.83009	5.33101	6.03607	3.73319	5.7354	3.6828
YER091C	MET6	785.247	452.565	664.774	581.653	657.211	936.373	608.036	428.244	134.58	307.133	182.44	398.88	159.297	248.7	194.803	324.801
YER091C-A	YER091C-A	3.52741	2.30217	2.18156	2.04183	2.18606	2.59549	2.77491	2.44973	2.3639	3.81933	1.58914	5.10575	1.06603	2.11251	1.46277	1.63647
YER092W	IES5	55.7785	51.5811	61.3099	40.5941	56.2849	79.2441	50.562	38.8797	86.1108	145.407	106.862	169.148	93.219	112.435	100.882	127.085
YER093C	TSC11	8.60928	10.4524	11.4466	6.61854	10.2098	11.8855	7.5991	7.05407	3.89051	8.10978	5.04263	9.00506	7.06776	6.71956	5.95575	6.69791
YER093C-A	AIM11	66.2086	74.8808	68.7712	56.1032	70.5657	62.8261	46.6038	60.5449	20.5771	36.7571	24.636	41.2701	29.0365	32.4032	25.5367	31.7297
YER094C	PUP3	218.623	282.967	278.577	177.514	269.394	306.856	185.755	206.579	81.8058	134.457	98.7572	141.81	80.1632	101.403	85.5041	104.312
YER095W	RAD51	85.7424	103.983	100.531	64.3701	98.5894	74.4665	74.0485	79.7646	158.539	248.93	198.072	262.737	260.042	231.05	257.662	249.136
YER096W	SHC1	14.0599	14.1655	17.4991	7.38628	13.7278	7.48461	11.7154	10.3381	8.12133	11.6439	10.6264	12.6126	16.351	15.5667	17.3504	16.4365
YER097W	YER097W	8.38311	6.43187	10.3483	5.35238	5.61443	6.73761	6.88185	5.71469	3.31211	6.33365	4.13811	5.98691	6.31649	6.70007	5.74135	6.24087
YER098W	UBP9	17.6802	16.8437	17.8723	14.1613	15.8991	14.9971	14.6321	14.0006	15.0967	21.0405	17.4539	21.323	19.6709	18.7948	19.5501	20.1154
YER099C	PRS2	31.6406	37.9795	40.4848	29.8582	36.0843	36.3797	32.9426	30.6445	35.9902	55.2719	44.3159	59.0738	42.1791	41.9703	42.0193	44.5837
YER100W	UBC6	47.0182	40.3027	41.7469	50.1526	43.6057	41.7072	49.2589	44.9553	59.2433	67.6473	67.2429	68.4136	43.0869	42.4875	40.9096	42.1833
YER101C	AST2	15.6869	15.0791	15.592	13.8788	15.1122	12.1877	14.547	13.7892	36.8899	52.5655	47.3805	57.0186	34.2214	37.7274	36.1454	38.4259
YER102W	RPS8B	343.079	306.993	352.564	498.493	361.267	471.046	448.867	388.146	31.5528	38.1662	35.1945	32.9627	10.4206	14.2908	14.377	15.4875
YER103W	SSA4	420.111	146.395	104.701	1034.39	161.026	130.801	546.423	607.086	3211.8	2580.88	3150.2	2569.08	2622.85	1880.83	2574.28	1868.76
YER104W	RTT105	22.7937	21.9392	22.7857	26.2561	19.9301	26.3609	22.6736	26.5977	37.8098	34.3145	39.1204	32.0205	35.4503	35.9628	35.7806	34.5529
YER105C	NUP157	21.4212	22.6709	25.6234	19.9311	23.4435	27.7413	21.1997	19.7639	2.33267	4.23146	2.71016	4.15071	5.17934	4.7908	4.36861	4.95419
YER106W	MAM1	1.1598	0.72025	1.47462	1.16928	0.640413	0.823441	0.662945	0.748778	0.269619	0.560239	0.415393	0.476669	0.283106	0.309559	0.34114	0.382455
YER107C	GLE2	37.0779	41.0397	45.3325	35.0576	42.2787	44.599	34.3027	33.2007	2.45022	2.67193	2.77823	2.57655	2.69114	2.55175	2.4656	1.97721
YER107W-A	YER107W-A	32.4448	38.0886	41.427	26.1054	31.8698	32.4852	28.511	29.5606	1.07065	2.17317	1.50873	1.17214	2.56785	2.27426	1.24713	2.29473
YER109C	FLO8	5.73249	6.38296	8.00457	4.20388	6.92067	8.3343	5.63932	5.0158	0.775709	0.800115	0.859113	1.01841	1.20288	1.19065	1.28557	1.20167
YER110C	KAP123	11.586	10.906	12.3163	18.6785	11.8311	20.4413	14.203	13.852	2.56797	3.67315	3.28547	3.32378	4.89555	3.37751	4.81907	3.45234
YER111C	SWI4	6.56724	7.70702	9.83833	3.9931	8.31722	10.4326	5.91587	5.2918	0.453349	1.2229	0.561874	1.1914	0.941569	1.04118	0.83491	1.14781
YER112W	LSM4	78.0372	69.9561	77.7131	71.7941	72.4511	66.0448	75.5383	69.6789	10.7245	18.3641	12.6375	19.2253	9.83974	11.4891	9.80404	11.4197
YER113C	TMN3	8.48164	10.7281	12.1599	7.191	10.3633	13.3726	8.61714	7.23445	1.03656	1.21309	1.16815	1.18006	1.32045	1.08564	1.2271	0.99614
YER114C	BOI2	10.7888	11.6176	13.2469	9.35806	12.1678	11.9715	10.304	9.36735	15.761	23.6013	17.4694	23.8364	23.7168	22.1336	22.4408	22.8774
YER115C	SPR6	35.6812	43.8767	41.0255	29.888	37.3687	43.8361	29.4876	34.0709	67.3583	52.6086	63.0508	56.0831	51.8198	48.5877	49.774	50.368
YER116C	SLX8	19.4114	20.6255	20.6405	15.01	18.9348	21.0358	15.8611	16.3687	60.8797	68.6552	66.1604	70.8848	59.7197	64.0275	60.8758	64.3422
YER117W	RPL23B	362.373	275.089	359.19	476.896	338.072	449.445	490.287	348.183	16.6417	15.2566	18.6096	15.3003	6.72186	6.70038	7.72259	6.49118
YER118C	SHO1	16.2595	14.9942	16.2955	16.6604	15.7926	17.7059	14.3555	15.7207	1.08145	0.995067	1.19597	0.944615	0.878857	0.716593	0.936698	0.806452
YER119C	AVT6	35.3709	53.3054	52.3087	22.5497	44.7831	54.6845	25.461	29.518	34.0141	38.3757	33.1636	39.6221	29.8215	32.5267	30.6296	34.5409
YER119C-A	YER119C-A	12.0834	14.5185	14.1724	9.69318	13.0844	12.4524	7.44474	8.91999	4.25956	7.85898	5.04174	6.93461	6.65499	5.68917	5.92142	6.55942
YER120W	SCS2	252.031	291.066	310.127	260.116	296.576	284.862	243.378	251.36	59.281	106.202	67.4293	108.128	73.6207	76.7449	77.4441	78.2855
YER121W	YER121W	93.242	94.3679	89.4129	78.1439	88.0391	60.324	71.5347	85.3385	64.753	154.482	92.0115	168.085	198.086	165.664	165.927	175.056
YER122C	GLO3	46.6982	43.1401	48.7205	45.2048	46.3528	50.6964	43.7581	41.8483	12.0415	20.6167	14.1119	20.3494	16.1645	16.2075	16.0993	16.5661
YER123W	YCK3	19.7737	18.2189	21.9875	14.9515	19.9403	16.9897	18.2584	17.2189	2.60313	4.347	2.92434	4.10844	4.34787	4.0035	4.0409	3.80559
YER124C	DSE1	81.7567	70.8045	68.673	51.2275	66.7027	28.3039	52.2185	58.2682	6.36786	5.16032	7.17785	6.00118	5.19009	5.69251	3.93053	5.38414
YER125W	RSP5	92.4872	95.1263	110.617	69.9892	99.2444	94.4803	77.6179	75.73	20.7547	31.227	22.8823	28.024	33.1183	28.6931	31.288	28.3668
YER126C	NSA2	36.016	22.7942	22.6615	66.4353	27.8122	19.476	54.3814	52.7464	2.84492	3.03169	3.6898	2.98395	5.70772	2.33651	5.04243	2.62703
YER127W	LCP5	11.919	9.14995	8.45915	16.8253	9.81171	9.22353	14.86	14.6902	2.74905	4.1296	2.94989	3.95617	3.53472	3.01604	4.09392	2.36096
YER128W	VFA1	8.68629	7.86904	9.22737	9.20228	8.6135	9.13602	9.12978	9.42514	4.22956	8.44589	4.85019	8.92948	7.37442	6.67466	6.66834	6.97517
YER129W	SAK1	16.0086	18.6594	19.3366	13.2288	17.3687	21.344	15.1443	13.7104	2.28709	3.84168	2.481	3.85853	5.09356	4.83595	4.93908	5.31177
YER130C	COM2	23.5301	18.3972	18.9383	28.8296	17.7797	22.571	21.9589	21.6473	8.29559	9.99948	7.92281	10.1467	8.45784	10.8937	8.10008	9.82676
YER131W	RPS26B	1222.47	1017.11	1094.19	1623.35	1270.66	1105.48	1690.09	1407.78	12.057	13.9275	15.6634	13.0533	5.09019	6.76356	7.32563	7.1335
YER132C	PMD1	2.58629	3.11751	3.35135	2.35589	2.86513	3.80021	2.38568	2.32066	0.818328	1.42401	1.00851	1.48914	1.54145	1.40314	1.53481	1.36569
YER133W	GLC7	235.473	238.852	254.818	177.822	237.18	225.286	197.406	213.569	51.7735	79.8635	63.9871	85.7099	83.7542	83.0249	77.8425	86.279
YER133W-A	YER133W-A	53.3833	63.2856	67.348	40.4755	60.6764	70.5827	51.6565	47.9119	8.12397	13.0118	9.36824	8.94401	10.5089	11.0925	7.74714	9.42079
YER134C	YER134C	36.6308	35.2962	41.5265	25.4202	35.6085	34.7685	32.2184	31.0757	7.73074	10.7921	9.02886	9.68816	10.0905	7.59932	6.36003	6.59419
YER135C	YER135C	6.20006	7.49075	7.21468	3.88781	5.26319	8.19938	4.50931	5.60777	0.467735	0.86056	0.736786	1.2525	0.758907	0.873144	0.514713	0.908337
YER136W	GDI1	142.222	158.444	169.74	108.439	152.516	154.649	107.378	123.124	27.9266	59.6457	34.5616	63.949	58.7651	62.6054	60.3557	69.522
YER137C	YER137C	10.5244	11.3646	10.0096	10.8277	10.8066	11.7673	9.54673	10.6037	1.6744	2.77363	2.37958	2.47049	2.38965	1.97638	1.31181	1.39391
YER137C-A	YER137C-A	0	0	0	0	0	0	0	0	0	0	0	0	0	0	0	0
YER137W-A	YER137W-A	1.27689	1.28106	1.07928	0.822345	1.65437	0.786442	1.65788	1.82885	0.70282	0.397167	0.122884	0.475581	0.16045	0.740659	0.462611	0.151211
YER138C	YER138C	1.66145	2.34788	1.95244	1.72135	2.0308	1.83834	1.0358	2.14094	0.654382	0.622588	0.566631	0.583966	0.40726	0.363008	0.124904	0.362584
YER138W-A	YER138W-A	75.8795	111.656	95.0461	73.5734	59.397	88.8026	58.4618	79.5216	14.3958	17.1074	11.1131	32.4478	26.7245	33.767	20.5194	31.7624
YER139C	RTR1	26.5934	29.8752	27.4863	21.7204	27.8143	31.3649	24.4704	26.3481	3.32344	6.48433	4.49877	6.67882	7.44436	9.96516	7.15394	10.8612
YER140W	EMP65	9.13559	10.7781	10.8207	8.08215	10.5785	12.343	8.15404	8.90702	1.95835	4.34766	2.46757	4.74691	4.35089	4.24644	4.09742	4.53326
YER141W	COX15	137.499	172.718	166.71	114.8	149.388	147.984	107.222	128.3	188.5	326.762	230.485	375.279	392.208	383.779	378.899	410.2
YER142C	MAG1	18.4026	27.3416	24.7563	10.4718	20.3132	29.3098	12.8255	15.4697	25.0172	52.8611	35.0065	62.9671	65.3481	69.6527	55.9846	67.4294
YER143W	DDI1	61.5042	65.5166	63.8946	53.3062	61.8665	62.2301	48.7968	57.2261	16.5324	28.4761	21.3848	32.1481	24.5431	30.3796	24.8539	30.3051
YER144C	UBP5	27.1227	28.5071	30.5796	21.4378	28.7144	32.5904	24.1999	23.6422	5.00769	8.17468	5.67331	7.35855	16.2534	16.4558	14.4333	16.1518
YER145C	FTR1	16.2698	13.5394	18.0552	16.7847	18.1706	15.4941	20.639	15.2211	5.07564	6.91449	6.13472	7.41981	6.82363	7.55777	6.63603	8.25701
YER145C-A	YER145C-A	15.3495	16.5558	14.1374	15.6773	13.6779	12.265	16.1187	14.5393	5.02068	7.48228	6.269	8.68622	6.06662	6.64899	5.45862	5.7549
YER146W	LSM5	122.278	112.267	108.393	118.048	128.568	126.876	124.429	115.035	43.6959	74.6957	41.3615	73.2515	46.5236	51.1064	50.6287	50.6883
YER147C	SCC4	18.0668	21.1158	19.9689	15.6577	19.5921	17.7201	16.0473	17.4766	19.3496	33.843	20.8502	31.4198	29.6405	29.545	29.7557	29.1907
YER147C-A	YER147C-A	71.6192	61.0346	59.1694	73.1836	54.4841	52.1844	58.1569	63.1937	144.141	161.635	163.964	178.637	143.767	142.615	150.78	146.401
YER148W	SPT15	83.7859	77.1872	80.5164	89.6958	77.6646	75.9707	79.0222	77.718	146.111	193.076	174.087	215.078	158.056	151.199	145.534	158.681
YER148W-A	YER148W-A	20.2427	19.9017	17.1347	23.3494	17.7197	19.2246	17.5453	21.0142	2.17016	3.94996	3.32521	2.48244	1.57197	1.17165	1.42164	1.92184
YER149C	PEA2	14.727	8.86137	8.72679	23.3364	8.97435	6.30196	13.1843	13.3912	3.16263	2.33526	3.44093	2.23468	1.78937	1.3998	2.22167	1.22037
YER150W	SPI1	1994.53	1799.29	1439.39	1988.29	1567.33	925.972	1485.35	2118.64	5171.16	3086.88	4728.1	3382.78	3481.22	3202.96	3248.7	3360.99
YER151C	UBP3	18.0352	20.3696	20.9072	18.6164	19.5181	22.6392	16.4707	17.1112	33.1066	38.6582	37.7554	43.0516	36.2171	30.9554	33.9252	31.6855
YER152C	YER152C	54.2117	78.9919	76.0907	46.9269	68.4093	87.4398	48.1258	52.6091	24.8402	21.0746	22.8411	21.453	22.7127	25.5988	21.2707	24.8661
YER152W-A	YER152W-A	8.35012	10.1668	11.9134	4.94759	9.41558	12.3355	5.60352	7.67305	2.73838	3.58825	4.03389	3.64524	2.91279	3.9868	4.29981	4.39205
YER153C	PET122	12.5976	16.9589	16.4989	9.57303	16.6978	16.8196	10.6985	11.5175	7.65256	9.16211	7.61557	9.15692	9.41625	9.62283	8.0123	9.71836
YER154W	OXA1	32.4108	40.1628	45.9349	31.8212	40.2923	48.5992	32.099	28.5788	8.39302	13.3327	9.22149	12.6227	11.7744	13.287	11.4855	12.8045
YER155C	BEM2	11.1655	14.297	15.4623	9.13505	13.2181	18.7439	10.3485	10.1715	1.29481	2.69922	1.68352	2.88406	3.88208	3.41183	3.17171	3.40221
YER156C	YER156C	60.4652	47.6907	46.3805	77.5314	53.2089	47.5518	62.7022	64.2226	4.84755	5.83419	5.71885	5.92363	5.83145	3.62472	5.24186	3.6136
YER157W	COG3	14.6998	12.4661	13.3303	12.2553	12.3324	11.3765	12.5149	12.3516	0.803384	1.1634	1.03192	1.07331	0.940907	0.713929	0.867322	0.700846
YER158C	YER158C	16.5563	23.0649	28.0921	13.8288	21.4419	24.4202	14.6916	14.1613	10.1731	8.02478	10.6182	7.71137	11.7567	6.97385	11.8242	6.79836
YER158W-A	YER158W-A	280.678	258.37	247.216	259.013	244.577	249.319	218.833	260.735	172.628	217.829	180.123	210.532	176.047	161.965	175.436	161.876
YER159C	BUR6	275.311	239.63	232.028	280.618	228.126	226.691	250.42	254.046	182.123	229.33	202.597	236.253	198.672	193.308	189.661	187.302
YER159C-A	YER159C-A	0	0	0	0	0	0	0	0	0	0	0	0	0	0.055403	0	0
YER160C	YER160C	0.0228038	0.101609	0.105564	0.0462963	0	0.123018	0.0232359	9.54584e-10	0.0329643	0	0	0	0.0215073	0	0	0
YER161C	SPT2	39.483	40.5773	38.5204	33.391	35.0633	34.025	32.8554	34.8871	62.2034	88.9566	71.7388	88.2863	65.0002	63.0696	64.0313	65.0885
YER162C	RAD4	18.6604	24.0778	22.45	13.8859	21.1115	20.9333	15.4999	16.8743	59.8786	63.567	67.4594	68.1582	57.8414	53.2974	55.4711	57.7206
YER163C	GCG1	83.5398	142.292	127.732	60.1528	117.314	161.148	63.9167	82.6897	206.392	225.139	208.687	242.31	167.892	174.065	168.208	180.472
YER164W	CHD1	17.8411	19.2596	21.0064	19.4335	19.5701	21.946	18.8914	16.8087	14.0627	23.7232	15.9066	22.6007	14.9863	15.0365	15.0687	13.9003
YER165C-A	YER165C-A	9.62589	7.3547	10.4245	6.72601	10.245	7.00289	9.76631	8.31012	6.38197	8.67451	7.98139	9.79887	12.4206	11.6371	11.0822	12.1971
YER165W	PAB1	169.309	181.297	195.133	207.672	183.56	253.054	177.01	176.583	30.107	38.9871	37.1247	42.4587	48.3356	37.957	45.6093	40.0658
YER166W	DNF1	18.4454	22.3463	24.0476	18.4152	21.2931	27.0552	17.9144	17.0666	6.09724	10.1954	7.44049	10.6418	13.6542	11.4227	13.038	12.4372
YER167W	BCK2	12.7668	15.2791	18.1903	10.3455	16.3538	21.4128	12.478	11.2315	6.92685	13.5683	8.68647	15.1511	13.846	15.0111	13.0556	16.2085
YER168C	CCA1	28.2846	25.7128	28.3603	23.1162	25.8582	23.6579	24.2441	24.1623	11.5644	17.8453	13.2351	15.6341	12.437	11.825	11.2136	9.73133
YER169W	RPH1	26.0406	23.247	28.1351	23.2103	23.2821	22.114	22.5063	23.1649	58.8391	80.1469	64.8139	74.8835	71.3591	64.1162	72.1846	62.4653
YER170W	ADK2	15.0891	18.1276	21.8235	11.4906	18.1785	17.8901	14.4585	11.9122	4.4138	5.71085	4.52506	4.33201	7.89808	5.83414	7.22889	5.66381
YER171W	RAD3	10.7713	11.0199	14.0117	9.07987	10.1822	14.8569	10.0374	10.0256	0.675434	0.946404	0.948591	0.995902	1.21348	0.939666	1.2295	0.918443
YER172C	BRR2	9.00016	9.56779	9.87605	7.98511	9.39684	11.1674	8.09711	8.22675	1.30359	2.58273	1.68671	2.44283	2.98931	2.60492	2.54218	2.36328
YER172C-A	YER172C-A	3.37302	2.92564	4.13331	1.97217	2.12534	1.49122	3.03527	3.34213	1.0209	1.52119	0.971926	2.65205	2.14284	3.47599	2.06957	1.85115
YER173W	RAD24	8.59153	8.60146	8.3774	7.3441	8.6991	7.68816	7.08266	7.9487	1.65685	3.79106	2.03118	3.63534	3.26376	3.30995	3.02935	3.36737
YER174C	GRX4	64.5032	82.4829	70.9335	61.2799	57.5074	68.2673	40.3716	46.602	18.6286	46.019	22.0809	46.4895	41.2745	43.6466	42.0856	44.2835
YER175C	TMT1	21.3762	23.7526	23.6537	15.6695	21.2232	20.1656	18.0644	18.5892	3.43897	4.60464	4.28142	4.47402	6.25671	6.53649	6.05469	6.43156
YER175W-A	YER175W-A	38.0116	36.1591	33.9465	24.1196	25.3359	34.0936	32.4478	37.4264	0.631357	0.74001	0.656741	1.09109	0.391669	1.97595	0.777834	0.772905
YER176W	ECM32	26.3825	30.96	29.7736	24.7285	29.9761	33.8768	22.6964	24.3177	2.65281	3.36882	3.08574	3.314	3.51924	3.0974	3.47369	3.1715
YER177W	BMH1	847.497	827.747	887.589	838.187	853.806	821.054	794.805	776.079	121.864	129.105	131.408	135.674	127.477	111.126	124.622	116.401
YER178W	PDA1	347.832	449.873	468.593	276.18	424.714	457.264	289.087	324.969	155.13	108.985	151.887	116.634	131.809	122.165	126.82	130.504
YER179W	DMC1	8.08709	6.62009	7.24727	6.62961	7.27989	4.03809	6.41985	7.22633	1.08207	1.11197	1.0866	1.30527	0.91959	0.977934	1.12782	0.996308
YER180C	ISC10	25.7221	30.8968	26.7163	23.1291	29.0664	32.1328	19.1539	23.9238	7.6021	15.8806	10.5804	15.9379	10.8199	13.7736	11.9457	13.5043
YER180C-A	SLO1	24.94	21.2035	22.8576	24.4356	23.7331	18.9813	20.7573	18.8299	21.3666	25.3651	22.8966	32.753	21.7339	21.4254	19.2601	25.783
YER181C	YER181C	2.19615	1.37876	1.35564	1.25591	3.05322	1.13585	1.8787	1.57527	2.44541	5.34862	4.9582	8.50028	3.78851	4.38064	5.21596	6.55085
YER182W	FMP10	90.1869	117.258	117.407	70.8139	102.896	112.248	74.0461	85.6923	88.7735	124.5	108.751	132.149	111.881	106.293	108.644	108.706
YER183C	FAU1	43.813	42.7246	40.2611	42.33	40.1069	35.8781	37.5062	41.7032	15.425	26.9874	18.8856	27.0017	20.9244	17.7203	18.5903	16.0976
YER184C	TOG1	5.08934	5.1317	5.74697	4.00909	5.09901	5.03228	4.35128	4.16256	1.37569	1.32496	1.4205	1.53429	3.43512	2.33863	2.92351	2.13664
YER185W	PUG1	4.43652	5.21451	4.50382	2.13503	4.49836	3.7221	2.9854	3.36945	0.501259	0.468718	0.470135	0.366859	0.258473	0.484474	0.226512	0.275097
YER186C	YER186C	29.1762	39.8808	41.659	24.7387	35.5562	42.8542	31.2787	31.5925	7.39363	12.9022	8.77012	13.6044	18.6211	18.3624	15.0401	18.649
YER187W	YER187W	38.3525	43.9586	46.1359	42.964	38.1721	48.0683	40.0652	46.2226	26.6764	29.6463	26.1106	30.5828	18.0075	27.1802	17.7493	26.6747
YER188C-A	YER188C-A	0.179401	0.847257	0.465101	0	0	0	0.211782	0.34143	0.0964738	0	0	0	0	0	0.133546	0
YER188W	YER188W	0.852509	0.372114	0.661325	0.635444	0.271585	0.467462	0.427732	0.712139	0.627372	0.63009	0.354778	0.696544	0.568962	1.01175	0.640605	1.00023
YER189W	YER189W	0.525182	0.642025	0.307766	0	0.305399	1.27426	0.138907	0.385461	0	0.260336	0.188442	0.51137	0.233943	0.124393	0.34559	0
YER190C-A	YER190C-A	0	0	0	0	0	0	0	0	0	0	0	0	0	0	0	0
YER190C-B	YER190C-B	0	0	0	0	0	0	0	0	0	0	0	0	0	0	0	0
YER190W	YRF1-2	0.0141032	0.0146414	0.03268	0	0	0.0171655	0	0.0149895	0.0266678	0	0	0.0162017	0.0159869	0.0168244	0	0
YFL001W	DEG1	9.16512	7.24364	7.76189	11.05	7.00984	7.66443	9.09561	7.85561	1.77812	1.92185	1.69955	1.67699	1.56918	1.42155	1.40919	1.06913
YFL002C	SPB4	13.0584	11.9203	12.0753	14.9092	12.1848	14.6616	13.2804	13.0844	3.11812	3.30886	3.3952	2.85549	3.52211	3.44522	2.84809	2.50669
YFL002W-A	YFL002W-A	0.510884	0.42518	0.240072	0.249947	0.42537	0.407893	0.466783	0.377523	0.0701356	0.0704213	0.0662157	0.022979	0.0424366	0.0520744	0.066604	0.0686676
YFL002W-B	YFL002W-B	0	0	0	0	0	0	0	0	0	0	0	0	0	0	0	0
YFL003C	MSH4	1.16166	1.19549	1.41953	0.935455	0.990465	1.33187	1.09621	1.03437	0.323652	0.459787	0.311798	0.424497	0.490489	0.343299	0.389698	0.323933
YFL004W	VTC2	32.5567	37.0368	38.9143	28.5987	34.5098	38.549	28.9672	29.7981	14.6852	18.3833	16.749	21.9415	16.7015	18.7981	15.3508	19.4713
YFL005W	SEC4	104.311	117.768	131.593	87.9586	118.14	127.717	97.7176	99.6527	28.3602	52.2624	32.4294	53.7661	50.3246	50.446	44.95	52.0805
YFL007W	BLM10	20.149	27.9186	28.2125	16.6861	25.1709	34.0705	18.1374	19.307	7.85391	15.3351	9.6183	16.1992	17.8019	18.7497	17.3052	18.7773
YFL008W	SMC1	6.8891	6.70868	7.56372	6.28611	6.84547	6.90009	6.907	5.78757	1.05862	1.52779	1.20037	1.59953	2.05115	1.74032	1.87596	1.7148
YFL009W	CDC4	22.4725	23.2892	26.1303	16.853	23.2108	23.7531	19.9396	18.9247	15.2503	32.8682	18.2236	32.1042	31.3596	34.874	28.7618	32.91
YFL010C	WWM1	39.7171	38.7379	44.4375	38.622	43.8349	46.2074	38.3248	38.0858	18.4278	33.9718	18.9576	31.762	29.8776	28.6277	28.7174	27.7894
YFL010W-A	AUA1	67.3988	100.388	91.4468	68.9472	87.2925	148.069	65.424	73.3348	10.2735	35.8952	14.4636	39.132	29.91	29.6759	21.9875	27.2645
YFL011W	HXT10	1.04172	0.765675	1.10089	0.406039	0.915036	0.653622	0.748629	0.580226	0.40688	0.871332	0.437054	0.852768	0.464158	0.930928	0.526892	0.991253
YFL012W	YFL012W	0.354205	0.293713	0.349557	0.220831	0.356617	0.0834585	0.233118	0.0754876	0	0.234192	0	0.0567314	0.185616	0	0.0598608	0
YFL012W-A	YFL012W-A	2.75775	2.21297	1.56561	1.81365	1.7099	1.61195	1.83599	1.86347	0.329761	0.476035	0.613553	0.601693	1.04727	0.881509	0.413188	0.381612
YFL013C	IES1	25.663	23.2627	23.7332	20.7838	22.7541	18.7109	20.3167	22.357	5.78955	8.98646	7.051	8.06196	8.43705	8.53022	7.98986	7.46792
YFL013W-A	YFL013W-A	21.9892	19.8847	21.1844	14.5169	16.6631	15.3462	15.0298	17.6779	6.40976	8.74812	7.25967	8.67532	7.47292	7.41266	7.63041	7.59153
YFL014W	HSP12	17215.7	20483.2	21703.3	8868.4	18381.9	17326.7	12264.5	14307.7	6499.71	10587.1	7637.96	11212.2	16462.9	17147.8	15917.8	18335.4
YFL015C	YFL015C	7.2721	10.3529	7.55567	5.85978	7.32607	5.94799	4.44121	7.36447	3.84136	4.10712	3.60626	3.62269	2.59553	2.37665	2.0936	2.04628
YFL015W-A	YFL015W-A	8.2788	6.89284	7.28343	4.54551	5.83572	3.20555	5.55024	5.8849	0.464876	1.35321	0.397677	0.749874	0.549152	0.515826	0.44105	0.274051
YFL016C	MDJ1	130.426	98.8362	87.688	195.193	97.3093	85.7897	128.751	137.254	971.089	907.311	1029.55	924.983	781.555	623.097	769.259	644.892
YFL017C	GNA1	118.38	153.015	145.931	84.0016	134.808	136.265	88.869	104.714	31.2561	43.5752	30.0401	41.3372	33.804	38.9508	30.6582	31.0321
YFL017W-A	SMX2	220.812	245.258	199.712	182.811	236.464	186.126	175.376	217.157	39.8547	78.0246	46.4409	71.0269	51.3681	54.4979	46.2727	56.1133
YFL018C	LPD1	172.887	207.994	222.922	142.39	200.95	198.196	148.271	151.985	113.698	137.784	130.219	152.48	106.39	112.882	108.489	122.008
YFL019C	YFL019C	4.59243	6.01965	4.89246	1.72339	4.44706	7.19271	3.44476	4.26114	3.6254	4.76655	4.10125	5.5534	6.14026	8.70089	3.85556	7.84386
YFL020C	PAU5	28.089	40.2804	31.5006	21.4809	34.8317	34.4655	25.6532	28.245	12.4086	10.5696	13.3053	10.4341	8.08449	7.53374	9.80183	8.46677
YFL021C-A	YFL021C-A	7.09439	8.3009	6.67943	5.54882	6.05195	5.52223	5.57343	6.36721	9.92458	10.2803	10.5462	10.6695	7.99866	8.70306	7.48639	8.01582
YFL021W	GAT1	39.5715	23.6512	24.8679	21.6855	26.3979	15.6943	25.088	22.1477	36.571	47.6028	40.6635	49.4122	47.5157	47.7113	45.1825	49.7846
YFL022C	FRS2	58.6343	58.7932	61.626	79.2142	62.3114	71.7713	62.1	61.303	6.17373	6.28556	6.53926	5.74979	3.65127	3.29279	4.092	3.04975
YFL023W	BUD27	10.7529	9.93137	9.64663	15.1303	11.1583	9.38233	11.3435	12.8187	20.2681	36.9314	23.504	36.1727	19.0554	19.2671	18.4201	17.6466
YFL024C	EPL1	19.4747	20.2433	19.0716	16.287	17.6103	18.339	16.5319	16.6746	18.7462	33.4557	24.9011	35.496	22.5558	23.6386	21.2169	23.5559
YFL025C	BST1	5.38919	5.38695	6.04508	5.02476	5.11511	7.38781	5.37312	4.5116	0.72015	1.18308	0.819143	1.13157	1.45996	1.2101	1.14395	1.15895
YFL026W	STE2	4.89873	4.30984	3.65132	3.23648	3.89526	3.62162	4.69153	3.65516	0.578562	0.664185	0.434211	0.499214	0.978268	1.1301	0.702746	1.03087
YFL027C	GYP8	12.1216	12.5897	12.7999	9.61238	13.4034	12.3957	11.652	10.9233	0.482122	0.477475	0.517153	0.412786	0.660835	0.603491	0.521615	0.604043
YFL028C	CAF16	28.1193	30.8224	32.0073	25.1558	32.1297	29.3163	28.7442	28.7194	1.78349	2.12801	2.13249	1.78329	3.23636	2.31159	2.97637	2.17619
YFL029C	CAK1	30.2974	24.5825	25.4106	23.7025	23.6132	20.9993	24.0602	24.6487	3.00704	2.60375	2.63764	2.31123	2.9637	2.47388	2.90887	2.57906
YFL030W	AGX1	46.0954	69.9012	59.9196	26.148	55.7115	50.1046	31.7283	36.8888	157.539	87.4046	144.752	94.0105	206.896	139.307	172.625	142.768
YFL031C-A	YFL031C-A	4351.33	4968.31	4857.79	3426.42	4668.57	4540.81	3568.36	4041.6	590.998	709.493	606.615	710.838	620.283	580.91	452.049	517.359
YFL031W	HAC1	1510.92	1612.6	1683.09	1319.59	1601.29	1585.22	1231.57	1357.87	368.461	358.922	356.409	348.263	329.594	291.886	298.154	277.41
YFL032W	YFL032W	19.6009	17.5861	19.9124	17.3704	15.988	17.4648	14.3242	12.6829	6.88215	7.9525	6.17336	10.1131	6.41963	5.28597	8.4181	3.87854
YFL033C	RIM15	11.8467	13.6893	14.9957	9.81908	13.0887	15.4493	10.0425	10.1849	6.41472	9.03772	7.78674	9.37965	6.3574	6.4999	6.42302	6.63584
YFL034C-A	RPL22B	79.2129	57.3145	66.2654	133.503	72.9518	97.8227	114.477	92.4478	4.2878	4.8477	4.84493	5.02384	1.51584	1.86318	1.30691	1.47586
YFL034C-B	MOB2	15.081	10.2056	12.2509	16.8065	12.202	10.3845	14.8358	12.0619	0.803748	1.0731	0.703553	0.668695	0.677927	0.683015	1.06521	0.724145
YFL034W	YFL034W	15.0991	17.2874	17.9752	12.8291	16.2669	16.7677	13.7253	14.021	12.7469	20.8853	14.4374	21.0895	15.5044	15.6317	13.5545	14.2192
YFL036W	RPO41	28.3017	33.0798	37.933	22.7314	32.2401	35.2678	25.2767	25.0164	25.2319	37.7699	32.3771	39.1388	32.9195	29.4531	31.4455	30.4461
YFL037W	TUB2	95.5289	84.2714	105.981	87.6487	96.7707	97.3243	86.5285	80.3075	19.5584	20.1619	22.7437	18.6286	8.78898	10.7836	10.4618	9.95231
[truncated: 4,715 more rows]

## Sheet: Ratios
Table S5 - RNAseq Ratio NAΔxWA / NAxWAΔ (HPF1)
gene_id	gene_name	SDC_Exp	RM_Exp	SDC_D7	RM_D7
YMR056C	AAC1	1.29539	1.0145	1.40214	1.04118
YBR085W	AAC3	1.00262	0.975986	0.874022	0.519137
YJR155W	AAD10	1.18397	1.05172	0.86138	1.14549
YNL331C	AAD14	1.17303	0.86884	1.20621	0.972681
YOL165C	AAD15	1.02314	0.65854	0.488371	1.19395
YCR107W	AAD3	0.998519	0.759753	0.748149	0.997717
YDL243C	AAD4	0.999056	0.878173	1.19247	1.03496
YFL056C	AAD6	1.08411	0.833014	1.87363	1.1562
YNL141W	AAH1	0.847447	0.987506	0.987701	1.60684
YHR047C	AAP1	1.38504	0.904473	1.51662	1.29959
YBL074C	AAR2	1.06271	0.930835	0.863114	0.970969
YKL106W	AAT1	1.00413	1.05002	1.01075	1.47015
YLR027C	AAT2	1.08374	0.97894	0.75295	0.907259
YBR236C	ABD1	1.11737	0.90255	0.610943	0.869932
YKL112W	ABF1	1.09381	1.01253	0.671348	1.15906
YMR072W	ABF2	1.1108	1.08084	0.646772	0.842414
YJR108W	ABM1	1.24027	1.08712	0.937937	0.951765
YCR088W	ABP1	1.21421	0.84152	1.19326	1.10029
YOR239W	ABP140	0.947466	0.948661	0.798883	1.02861
YNR033W	ABZ1	1.12138	1.03709	0.898157	0.975349
YMR289W	ABZ2	1.14363	0.868108	1.12143	1.4594
YER045C	ACA1	1.0651	0.747653	1.12838	1.19099
YGR037C	ACB1	1.03515	0.93808	0.803357	0.77934
YNR016C	ACC1	1.14077	0.879241	0.342078	0.736381
YLR131C	ACE2	1.09424	0.787005	0.676122	0.815916
YLR144C	ACF2	1.02937	0.935186	0.724652	0.98122
YJR083C	ACF4	1.10849	1.06131	0.941865	1.07503
YBL015W	ACH1	1.16351	1.16364	1.3937	1.33241
YDL203C	ACK1	1.08301	1.11115	0.615701	1.04303
YPL267W	ACM1	0.922167	1.19776	1.09819	1.46652
YLR304C	ACO1	1.31592	0.887117	1.09174	1.08141
YJL200C	ACO2	0.988959	1.2684	1.34161	2.59603
YKL192C	ACP1	1.03049	0.945652	0.742172	0.967998
YAL054C	ACS1	1.06235	1.30171	0.769687	1.00951
YLR153C	ACS2	0.924592	1.0142	1.0371	1.64901
YFL039C	ACT1	1.01593	0.958314	0.914991	1.18621
YDR448W	ADA2	1.09993	1.06534	0.843026	1.1087
YMR184W	ADD37	1.05182	0.966892	0.675766	0.724233
YKL206C	ADD66	1.02731	1.02234	1.04349	1.12905
YAR015W	ADE1	0.629596	1.19262	0.423675	0.634443
YNL220W	ADE12	0.8188	1.12638	0.599779	0.79474
YLR359W	ADE13	0.678117	1.05707	0.39515	0.631137
YLR028C	ADE16	1.01724	0.870951	0.846801	1.00586
YMR120C	ADE17	0.633848	1.24942	0.376541	0.544092
YOR128C	ADE2	0.760744	0.998224	0.495192	0.609475
YGR204W	ADE3	0.980277	0.952159	0.761044	0.711268
YMR300C	ADE4	0.640077	1.19766	0.559272	0.747273
YGL234W	ADE5	0.728029	1.21751	0.385683	0.672841
YGR061C	ADE6	0.770926	1.14061	0.31129	0.63603
YDR408C	ADE8	0.88795	1.0765	0.486429	0.7281
YCL058W-A	ADF1	NA	NA	NA	NA
YOL086C	ADH1	0.917638	0.886995	0.693298	0.921022
YMR303C	ADH2	0.943132	0.864686	2.00328	1.45116
YMR083W	ADH3	0.993997	0.99314	1.13044	1.22702
YGL256W	ADH4	1.00166	1.10736	1.01179	0.798331
YBR145W	ADH5	1.03648	1.12918	0.69341	0.673295
YMR318C	ADH6	1.17816	0.832586	0.592793	0.869316
YCR105W	ADH7	1.14227	0.845186	0.655973	0.960154
YMR009W	ADI1	1.12824	1.07798	0.485652	0.959876
YDR226W	ADK1	0.967191	1.06037	1.11787	1.01999
YER170W	ADK2	1.24628	1.09512	0.890071	1.31562
YJR105W	ADO1	0.94804	1.02734	0.719553	0.993655
YCR011C	ADP1	1.1004	0.936932	0.674909	0.960539
YDR216W	ADR1	0.908266	1.2573	0.766626	1.16328
YCR010C	ADY2	1.05037	1.57532	0.757212	0.869604
YDL239C	ADY3	1.20611	0.862574	1.2455	1.40754
YLR227C	ADY4	1.09347	0.876714	0.488354	0.909364
YMR064W	AEP1	1.10473	0.97222	0.497594	0.999198
YMR282C	AEP2	1.08391	0.897335	0.381981	0.890621
YPL005W	AEP3	0.963396	0.952106	1.22604	0.825334
YLR040C	AFB1	1.32674	1.28257	1.19658	0.854242
YEL052W	AFG1	1.17214	1.002	0.68897	0.907825
YLR397C	AFG2	1.01427	0.88444	0.839267	1.24625
YER017C	AFG3	1.13223	0.962425	0.807737	0.96645
YOR129C	AFI1	1.08225	0.982052	0.475054	0.902605
YDR085C	AFR1	1.16885	0.766262	0.568781	0.727387
YGL071W	AFT1	1.27846	1.17368	0.634791	1.03912
YPL202C	AFT2	1.27171	1.02123	0.77441	1.05005
YNR044W	AGA1	1.17811	1.0992	0.647183	0.927048
YGL032C	AGA2	0.935766	1.46793	1.15589	0.339892
YPR021C	AGC1	1.22291	0.925885	0.922599	1.36365
YDR524C	AGE1	1.21998	0.842263	0.512506	0.853741
YIL044C	AGE2	1.09001	1.00915	0.724468	0.827811
YCL025C	AGP1	1.06212	1.41764	1.09291	1.26069
YBR132C	AGP2	1.16295	1.08252	0.690699	1.20813
YFL055W	AGP3	1.28471	0.894687	1.38504	1.12803
YFL030W	AGX1	1.10376	1.00513	1.66629	1.34546
YDR214W	AHA1	0.846835	0.848729	0.88871	1.09076
YOR023C	AHC1	1.08408	1.0015	0.917834	1.0173
YCR082W	AHC2	1.01827	0.854958	0.654002	1.03792
YLR109W	AHP1	0.881185	0.90985	0.95701	1.34019
YHR093W	AHT1	0.695644	1.04325	1.0312	1.81224
Q0050	AI1	0.968727	1.14288	1.65977	1.56008
Q0055	AI2	0.000520129	NA	NA	NA
Q0060	AI3	NA	NA	NA	NA
Q0065	AI4	1.11785	1.37839	1.09998	0.839735
Q0070	AI5_ALPHA	0.669634	0.183982	0.551091	0.248676
Q0075	AI5_BETA	0.393128	0.464547	0.377013	0.316886
YNR074C	AIF1	1.01649	0.933291	0.535872	1.001
YAL046C	AIM1	1.0589	0.861035	0.504138	0.918185
YER087W	AIM10	1.27485	0.902378	2.1591	1.20793
YER093C-A	AIM11	1.03051	0.949733	0.579453	0.850939
YGL160W	AIM14	1.09283	0.972354	0.435394	0.906932
YHL021C	AIM17	1.22222	1.2173	1.01197	1.37443
YHR198C	AIM18	1.10385	0.905357	0.459768	0.912803
YIL087C	AIM19	1.11573	0.960762	1.08689	0.872387
YAL049C	AIM2	1.05372	0.913922	1.01795	0.976884
YIL158W	AIM20	1.03325	0.933924	0.894317	0.807473
YIR003W	AIM21	1.16456	0.94476	0.74487	1.03938
YJL046W	AIM22	1.06155	0.865154	0.685573	1.00426
YJL131C	AIM23	1.04219	0.866923	0.824138	1.03452
YJR080C	AIM24	1.21004	0.862812	1.3367	0.893064
YJR100C	AIM25	1.13261	0.880883	0.551525	0.827896
YKL037W	AIM26	1.26462	1.01985	0.797975	1.07115
YKR074W	AIM29	0.993912	0.962027	0.539407	0.785543
YBR108W	AIM3	1.22132	0.926382	0.768967	1.01159
YML050W	AIM32	1.09683	0.908674	0.474697	1.01144
YML087C	AIM33	1.28008	0.862355	0.68607	0.918462
YMR003W	AIM34	0.99937	1.30031	0.506376	0.734889
YMR157C	AIM36	1.02615	0.972231	0.461383	0.874066
YOL053W	AIM39	1.1079	1.11698	0.624534	0.92349
YBR194W	AIM4	1.15156	0.882657	0.565696	0.980141
YOR215C	AIM41	1.21465	0.95454	0.772083	0.831312
YPL158C	AIM44	1.01653	1.0566	0.876852	0.936741
YPR004C	AIM45	1.07903	1.00525	0.431919	0.645562
YHR199C	AIM46	0.989941	0.865789	0.624534	0.832479
YDL237W	AIM6	1.1329	0.899251	0.891286	1.07974
YDR063W	AIM7	1.06255	0.898286	1.07521	1.36055
YER080W	AIM9	1.19528	0.957161	0.721134	0.88995
YMR092C	AIP1	1.12853	1.01108	0.697297	0.950682
YIL079C	AIR1	0.752872	0.868808	0.557533	0.797126
YDL175C	AIR2	1.07876	0.939218	0.612152	1.04851
YBR059C	AKL1	1.14118	0.888088	0.748355	1.06488
YDR264C	AKR1	1.21014	0.97352	0.643783	0.870472
YOR034C	AKR2	1.13192	0.889793	0.972778	1.11484
YOR335C	ALA1	1.00494	0.925702	0.661638	1.06627
YJL122W	ALB1	0.66868	1.01523	0.680774	1.16402
YMR170C	ALD2	1.11881	1.01907	1.15328	0.905929
YMR169C	ALD3	1.31464	1.14489	0.557413	0.791258
YOR374W	ALD4	1.25538	1.28475	0.555509	1.06598
YER073W	ALD5	0.919321	1.20083	0.913533	1.32214
YPL061W	ALD6	0.934603	1.25257	0.624033	1.3573
YOR175C	ALE1	1.13771	1.10292	0.656454	0.862721
YNL148C	ALF1	0.896917	0.857083	0.915998	0.980669
YBR110W	ALG1	1.18777	1.02439	0.635403	0.929295
YNL048W	ALG11	1.23278	1.01662	0.649001	1.24161
YNR030W	ALG12	1.13837	1.03892	1.95023	1.48097
YGL047W	ALG13	1.06417	0.825682	0.622785	0.781894
YBR070C	ALG14	1.05311	1.10387	1.17873	1.28981
YGL065C	ALG2	1.13881	1.01933	0.554157	1.08326
YBL082C	ALG3	1.02413	0.869754	0.894786	1.27367
YPL227C	ALG5	1.00756	0.993036	0.768261	1.04885
YOR002W	ALG6	1.16213	0.912867	0.912983	0.995036
YBR243C	ALG7	1.08673	1.06576	0.973345	1.31357
YOR067C	ALG8	1.2389	1.01928	0.949293	1.4757
YNL219C	ALG9	1.18045	1.14976	0.494337	0.921528
YGL021W	ALK1	1.31625	1.04476	1.92396	1.45825
YBL009W	ALK2	1.0278	1.32608	0.859071	1.48232
YML086C	ALO1	1.07627	1.03674	0.964765	1.07263
YNL270C	ALP1	1.03197	1.19603	0.586614	0.887067
YOL130W	ALR1	1.06124	1.10701	1.00747	1.01453
YFL050C	ALR2	1.04142	0.921836	1.53921	1.02491
YLR089C	ALT1	1.21148	0.845939	1.67329	1.36142
YDR111C	ALT2	1.12758	1.21508	0.845604	0.983454
YKR021W	ALY1	1.18558	1.0017	0.565667	1.00863
YJL084C	ALY2	1.04621	0.899279	0.616695	0.969504
YGR225W	AMA1	1.28276	0.845648	1.03333	0.709585
YML035C	AMD1	1.21153	0.991326	0.7551	0.916019
YDR242W	AMD2	1.10163	0.895998	0.792017	1.04536
YBR211C	AME1	1.02146	1.08081	0.512376	0.929715
YOR378W	AMF1	1.0582	0.915915	0.848513	0.883012
YBR158W	AMN1	0.981628	1.19844	0.990639	1.22042
YGL156W	AMS1	1.20362	0.896633	0.99165	1.05246
YJR047C	ANB1	0.252719	0.268933	0.64733	0.828234
YEL036C	ANP1	0.918847	0.874965	0.695496	0.863989
YKL047W	ANR2	1.13434	0.892757	0.719917	0.815831
YHR126C	ANS1	1.49726	0.855145	1.07835	0.656853
YPR128C	ANT1	1.05953	1.03513	1.17903	1.29874
YPR180W	AOS1	1.08807	0.958401	1.04136	0.945435
YCL050C	APA1	0.874519	1.01282	1.07415	1.22133
YDR530C	APA2	1.03672	0.884777	0.810475	0.858233
YNL172W	APC1	1.10313	1.00809	0.643629	1.09587
YDL008W	APC11	0.96688	0.969349	0.986349	0.705428
YLR127C	APC2	1.22025	0.928777	0.413761	0.933464
YDR118W	APC4	1.20423	1.05591	0.951762	1.40919
YOR249C	APC5	1.16125	1.05621	0.779246	1.04672
YLR102C	APC9	1.12297	1.03075	1.04666	0.990351
YBR151W	APD1	1.09267	0.884247	0.646948	0.950394
YKL103C	APE1	1.22137	0.911178	0.830039	0.960256
YKL157W	APE2	1.10358	0.874927	1.13703	0.897511
YBR286W	APE3	1.06285	1.00211	1.09149	0.992575
YHR113W	APE4	1.20052	0.898661	0.77319	0.992683
YDR525W	API2	1.06288	0.767479	0.514407	0.965997
YNL077W	APJ1	0.513917	1.09694	1.23238	1.28303
YJR005W	APL1	1.20367	1.04249	0.530892	0.92474
YKL135C	APL2	1.13207	1.05977	0.60339	1.07679
YBL037W	APL3	1.21117	0.924144	0.632626	1.05629
YPR029C	APL4	1.13503	0.925526	0.827516	1.14519
YPL195W	APL5	1.08111	0.943378	0.530972	0.849359
YGR261C	APL6	1.10315	0.913412	0.978716	1.9048
YPL259C	APM1	1.10486	1.0284	0.979484	1.19298
YHL019C	APM2	1.01538	0.858195	0.642526	1.00165
YBR288C	APM3	1.06267	0.946142	0.551921	1.25765
YOL062C	APM4	1.16094	0.937862	0.623903	0.953108
YKL114C	APN1	1.05726	0.95708	0.758325	0.939204
YBL019W	APN2	1.08118	0.871338	0.876504	0.966379
YNL094W	APP1	1.12098	0.89514	0.684939	0.90685
YIL040W	APQ12	1.12789	1.16784	0.609707	0.869247
YJL075C	APQ13	0.953432	1.03783	0.521967	1.01094
YLR170C	APS1	1.05748	0.982346	0.717948	1.11341
YJR058C	APS2	1.0593	0.929664	0.703013	0.911589
YJL024C	APS3	1.11867	0.972813	0.602081	0.80105
YML022W	APT1	0.854387	0.974351	0.748436	1.13094
YDR441C	APT2	1.26072	0.941348	0.818265	1.12738
YNL065W	AQR1	0.930309	0.660913	0.988973	1.07044
YPR192W	AQY1	1.27254	0.909162	1.20752	1.32554
YLL052C	AQY2	0.712896	1.22716	1.0417	1.27509
YBR149W	ARA1	1.15903	0.918287	0.637099	0.982269
YMR041C	ARA2	1.10269	0.947898	0.600212	1.00874
YER036C	ARB1	0.852248	0.983918	0.971393	1.02689
YGL105W	ARC1	1.04713	0.926914	1.2451	1.31493
YIL062C	ARC15	1.07539	0.912899	0.707702	0.903583
YLR370C	ARC18	1.26022	0.916505	0.659914	0.957075
YKL013C	ARC19	1.21852	0.805242	0.735099	0.871504
YNR035C	ARC35	1.13966	0.972377	0.667342	0.855204
YBR234C	ARC40	1.10338	0.93035	0.578744	0.84826
YHR013C	ARD1	1.06119	1.04152	1.45162	1.57558
YCR048W	ARE1	1.16321	0.93565	0.674122	1.027
YNR019W	ARE2	0.870189	0.979158	0.588533	1.00977
YDL192W	ARF1	0.971123	0.98244	0.758316	1.02165
YDL137W	ARF2	1.07441	0.891276	0.624374	0.946109
YOR094W	ARF3	1.0716	0.975458	0.980095	1.4171
YOL058W	ARG1	0.737294	1.01444	0.613649	0.826394
YJL071W	ARG2	1.21261	0.967979	0.976542	1.55036
YJL088W	ARG3	0.861818	1.0339	0.709826	1.23632
YHR018C	ARG4	1.0853	1.09946	1.36801	2.21843
YER069W	ARG5	1.19049	1.0465	0.746477	1.08053
YMR062C	ARG7	1.16356	1.27324	0.849915	1.46935
YOL140W	ARG8	0.990429	0.955382	0.876864	1.18898
YMR042W	ARG80	0.969245	0.980729	0.612075	0.949388
YML099C	ARG81	1.2924	1.02218	0.73166	1.16857
YDR173C	ARG82	1.06655	1.01122	0.848418	0.926148
YDR376W	ARH1	1.07909	0.929118	0.791759	0.763347
YGL157W	ARI1	0.968126	1.00537	0.966346	1.90455
YNL020C	ARK1	1.09418	0.854217	0.604096	1.09246
YBR164C	ARL1	1.08274	1.04749	1.0468	1.21038
YPL051W	ARL3	1.22726	1.01	0.821779	1.12001
YHL040C	ARN1	1.02123	0.918097	0.932069	1.08184
YHL047C	ARN2	1.24578	0.920096	1.70343	1.13876
YDR127W	ARO1	1.02379	0.826713	1.03286	1.89049
YDR380W	ARO10	1.12406	1.00668	1.04379	0.544271
YGL148W	ARO2	0.828734	0.951912	0.749743	1.28435
YDR035W	ARO3	1.07043	1.03289	0.736973	1.22479
YBR249C	ARO4	0.901183	1.08011	1.08934	2.26018
YPR060C	ARO7	0.939639	1.09043	0.859899	1.2163
YGL202W	ARO8	0.980291	1.0116	0.889502	1.57003
YDR421W	ARO80	1.13352	0.93662	0.661347	0.963971
YHR137W	ARO9	1.28768	0.97374	0.682299	0.629402
YHR129C	ARP1	1.05503	1.09827	0.846061	1.58891
YDR106W	ARP10	1.02318	0.934936	0.548621	1.06995
YDL029W	ARP2	1.23841	0.898807	0.655337	0.903326
YJR065C	ARP3	1.23277	0.881644	0.812881	0.995941
YJL081C	ARP4	1.08445	0.905181	1.09964	1.16311
YNL059C	ARP5	1.03721	0.892184	0.790207	0.899439
YLR085C	ARP6	1.08275	0.949502	0.934483	1.00969
YPR034W	ARP7	1.00073	1.08481	1.01135	1.32093
YOR141C	ARP8	1.08471	1.05163	0.680176	0.997658
YMR033W	ARP9	1.03644	1.09309	0.512249	1.0992
YPR199C	ARR1	1.0852	0.902601	1.02032	1.1018
YPR200C	ARR2	1.22649	0.873938	1.08168	0.66474
YPR201W	ARR3	1.14593	1.00929	0.795272	0.964263
YLR392C	ART10	1.1452	1.03538	0.37109	1.06098
YGR068C	ART5	1.0152	1.00594	0.929474	1.20258
YLR242C	ARV1	1.00253	0.880123	0.674829	1.3756
YDR101C	ARX1	0.64055	1.08239	1.00048	1.56536
YPR085C	ASA1	1.07484	0.892701	0.638533	0.951525
YMR116C	ASC1	0.90049	1.05924	1.23788	1.28279
YOR058C	ASE1	1.09629	0.870949	0.96417	1.12706
YJL115W	ASF1	0.923681	1.16387	1.10326	1.27495
YDL197C	ASF2	0.964833	0.923094	1.30988	1.49196
YIL130W	ASG1	1.10927	1.16173	0.626163	0.909348
YJL170C	ASG7	1.22965	0.99362	0.663668	1.07197
YKL185W	ASH1	0.843668	0.894918	0.819643	1.11909
YMR119W	ASI1	1.23585	0.974015	0.590651	0.723917
YNL159C	ASI2	1.1527	1.01447	0.593858	0.86971
YNL008C	ASI3	1.14173	0.977901	0.783014	0.967344
YKL052C	ASK1	0.865213	1.07704	0.800192	0.976884
YGR097W	ASK10	1.11639	0.612151	0.633602	0.979123
YDL088C	ASM4	1.15685	1.0744	0.565543	0.968891
YPR145W	ASN1	1.24518	1.42314	1.34514	1.97958
YGR124W	ASN2	0.957437	1.01797	0.861744	1.19318
YDR321W	ASP1	0.858883	0.840678	0.99488	1.36863
YLR155C	ASP3-1	NA	NA	NA	NA
YLR157C	ASP3-2	NA	NA	NA	NA
YLR158C	ASP3-3	NA	NA	NA	NA
YLR160C	ASP3-4	NA	NA	NA	NA
YPR093C	ASR1	1.07294	1.01768	0.75988	0.917694
YBL069W	AST1	0.941848	1.08377	0.82803	1.22949
YER101C	AST2	1.08015	1.14175	0.769002	0.924015
YDR184C	ATC1	0.972109	0.912198	1.04677	0.897459
YGL017W	ATE1	1.09529	1.12448	1.16938	1.02005
YOR377W	ATF1	1.11556	0.972739	0.737578	1.07636
YGR177C	ATF2	0.946088	1.10823	0.627506	1.29352
YGL180W	ATG1	1.25826	0.984587	0.552302	0.877082
YLL042C	ATG10	1.28338	0.989446	0.695771	1.11598
YPR049C	ATG11	1.16826	1.09493	0.657994	1.05006
YBR217W	ATG12	1.11003	0.980974	0.484888	1.02282
YPR185W	ATG13	1.10146	0.991953	0.814986	1.19816
YBR128C	ATG14	1.05492	0.938592	0.587297	0.942517
YCR068W	ATG15	1.26665	1.09373	0.859667	0.989509
YMR159C	ATG16	1.09736	1.05738	0.575503	0.901973
YLR423C	ATG17	1.2683	1.09583	0.656318	0.876408
YFR021W	ATG18	1.06131	0.89367	0.723436	0.872359
YOL082W	ATG19	1.14219	1.12797	1.11814	0.928578
YNL242W	ATG2	1.24707	1.03341	0.500564	1.10566
YDL113C	ATG20	1.21559	1.07844	0.581084	1.09811
YPL100W	ATG21	1.09491	1.09573	0.734922	0.98399
YCL038C	ATG22	1.26649	0.836431	0.683038	0.778499
YLR431C	ATG23	1.16571	1.0541	0.544701	1.05793
YLR189C	ATG26	1.14189	1.01443	0.760031	1.00328
YJL178C	ATG27	1.15075	0.998383	0.694018	0.917578
YPL166W	ATG29	1.25943	1.25769	0.512386	0.893424
YNR007C	ATG3	1.10267	1.03785	1.02428	1.21268
YDR022C	ATG31	1.04428	0.856716	0.618709	0.85958
YIL146C	ATG32	1.19349	1.00369	0.851663	0.968875
YLR356W	ATG33	1.24517	0.904898	0.597353	0.890459
YOL083W	ATG34	1.19898	0.89514	0.62266	0.960455
YJL185C	ATG36	1.24272	0.998403	0.602353	1.00678
YLR211C	ATG38	1.28716	1.02855	1.38393	0.940622
YNL223W	ATG4	1.13687	0.930827	0.534347	0.94397
YPL149W	ATG5	1.1636	0.969728	0.589562	1.05866
YHR171W	ATG7	1.16931	1.10435	0.590472	1.14016
YBL078C	ATG8	1.21109	0.990717	0.943588	0.899453
YDL149W	ATG9	1.21543	0.960286	0.482378	1.03864
YPR026W	ATH1	1.23983	1.16271	0.680453	1.02921
YMR301C	ATM1	1.0337	0.964909	0.775135	1.22522
YNR002C	ATO2	1.18409	1.39721	0.726394	1.03451
YDR384C	ATO3	0.91544	1.26387	1.08235	1.5124
YBL099W	ATP1	1.12879	0.943217	1.26396	1.04583
YLR393W	ATP10	1.36022	1.11177	0.503087	1.06163
YNL315C	ATP11	0.969619	0.826138	0.715508	0.796341
YJL180C	ATP12	1.13955	0.761023	0.774307	1.15795
YLR295C	ATP14	1.21423	0.955187	1.03671	1.04386
YPL271W	ATP15	1.12484	0.810378	0.849144	0.991662
YDL004W	ATP16	1.16319	0.899673	1.12395	0.992133
YDR377W	ATP17	1.27648	0.929009	1.00897	0.991876
YML081C-A	ATP18	1.06241	0.88281	0.962717	1.02287
YOL077W-A	ATP19	1.24834	0.755506	0.844245	1.0561
YJR121W	ATP2	1.15168	0.90247	1.03196	1.0208
YPR020W	ATP20	1.16361	0.820845	0.729037	1.0778
YDR350C	ATP22	1.12088	0.968084	0.543431	0.923211
YNR020C	ATP23	1.03378	0.864782	0.562726	0.998718
YMR098C	ATP25	1.10489	0.876076	0.534017	0.934588
YBR039W	ATP3	1.18529	0.895381	0.948459	1.14202
YPL078C	ATP4	1.0972	0.915924	1.22256	1.0892
YDR298C	ATP5	1.10582	0.922713	1.01995	1.04689
Q0085	ATP6	0.921649	0.55935	1.29977	0.551257
YKL016C	ATP7	1.01208	0.971795	0.790729	0.956436
Q0080	ATP8	NA	0.497332	22.5333	3.3364
YML116W	ATR1	1.06816	1.02236	0.379959	0.813128
YAL020C	ATS1	0.982083	0.792726	0.757377	0.901314
YNL259C	ATX1	1.17113	0.720121	0.54088	0.733942
YOR079C	ATX2	1.14453	1.06623	0.687574	1.12944
YFL010W-A	AUA1	0.938054	0.689765	0.329708	0.911435
YKL004W	AUR1	1.00197	0.982037	0.696618	0.8996
YOR011W	AUS1	1.25542	0.972838	0.759016	0.767707
YLR114C	AVL9	1.11768	0.872177	0.698219	0.962157
YOL078W	AVO1	1.11984	0.850501	0.545517	1.00499
YMR068W	AVO2	1.09362	0.877898	0.551691	0.906215
YJR001W	AVT1	1.09146	0.998688	0.896422	0.975734
YEL064C	AVT2	1.2187	1.07562	0.760085	0.996823
YKL146W	AVT3	1.15499	1.01007	0.785947	1.00608
YNL101W	AVT4	1.21651	1.09286	0.639922	0.884721
YBL089W	AVT5	1.05979	0.952207	0.611993	1.13401
YER119C	AVT6	1.15588	0.834228	0.861277	0.901346
YIL088C	AVT7	1.08974	0.891289	0.451881	0.710644
YPR122W	AXL1	1.14146	1.00453	1.12154	1.1512
YIL140W	AXL2	1.23198	1.1648	0.757424	1.21822
YIL124W	AYR1	1.20543	0.853061	1.30744	0.98145
YLL063C	AYT1	1.33349	1.10131	0.964053	1.32336
YOR113W	AZF1	1.23845	1.13586	0.536188	1.16931
YGR224W	AZR1	1.12664	0.937556	0.909701	1.04352
YOR134W	BAG7	1.01303	0.911574	0.766032	1.1849
YBR068C	BAP2	0.743707	0.607556	1.66297	1.63976
YDR046C	BAP3	1.01417	0.963743	2.16675	1.34067
YIL015W	BAR1	1.22974	1.2583	2.35478	0.9838
YKR099W	BAS1	0.868714	0.818161	0.441015	1.13791
YHR208W	BAT1	0.828243	1.13884	1.17372	1.97371
YJR148W	BAT2	1.2758	1.06444	0.922282	1.05268
YJL020C	BBC1	1.17594	0.923725	0.825409	1.01017
YPL255W	BBP1	1.13429	1.02505	0.839784	1.08475
YHR040W	BCD1	0.893919	1.00273	0.926008	1.16003
YMR237W	BCH1	1.13705	0.906426	0.822835	1.08452
YKR027W	BCH2	1.03982	0.883848	1.20924	0.82254
YJL095W	BCK1	1.04046	0.881813	0.649179	0.892217
YER167W	BCK2	1.2081	0.883211	0.543651	0.861689
YDR361C	BCP1	0.899664	0.940189	0.585407	1.11244
YDR375C	BCS1	0.922838	0.941681	0.784586	0.872751
YIL033C	BCY1	1.16373	0.966664	1.13513	1.01639
YLR399C	BDF1	1.07366	1.02191	0.861106	0.995859
YDL070W	BDF2	1.09157	0.76032	0.800066	1.10698
YAL060W	BDH1	1.08167	0.997728	2.4102	1.2201
YAL061W	BDH2	0.812209	1.17362	1.60172	1.44416
YNL039W	BDP1	1.0685	0.908109	0.644617	1.04795
YOL164W	BDS1	1.17679	0.935948	0.87116	1.02474
YBR200W	BEM1	1.20915	1.02797	0.539126	1.00188
YER155C	BEM2	1.13638	0.815019	0.533437	1.03518
YPL115C	BEM3	1.14146	0.958892	0.578265	1.15426
YPL161C	BEM4	1.26291	1.08349	0.931647	1.00856
YLR412W	BER1	1.03575	0.963139	0.833735	1.13107
YIL004C	BET1	1.08554	0.891291	0.669285	0.905609
YPR176C	BET2	1.09717	1.05074	0.62864	0.973269
YKR068C	BET3	1.17852	1.03703	0.546349	0.774771
YJL031C	BET4	1.08331	0.83606	0.705485	0.735859
YML077W	BET5	1.05964	0.956617	0.77511	1.0536
YJR053W	BFA1	1.05878	1.03572	1.35174	1.96575
YOR198C	BFR1	1.04101	0.870843	1.08989	1.2771
YDR299W	BFR2	0.710913	1.02527	0.842451	1.94646
YGR282C	BGL2	1.04791	0.785382	0.749985	0.973569
Q0110	BI2	0.645078	0.411138	0.808688	0.42041
Q0115	BI3	1.14767	0.463758	0.384937	3.25609
Q0120	BI4	0.566692	1.15683	1.41372	1.5821
YHR101C	BIG1	1.10697	0.890324	0.845471	1.06048
YCL029C	BIK1	1.05383	0.899654	0.706992	0.806066
YOR304C-A	BIL1	1.14686	1.04337	1.19821	1.80657
YER016W	BIM1	1.04238	1.01508	0.857997	1.20339
YGR286C	BIO2	1.39459	1.38514	1.09158	1.63696
YNR058W	BIO3	1.95628	1.21245	1.00865	1.32009
YNR057C	BIO4	1.30331	0.907856	0.807625	1.02159
YNR056C	BIO5	1.52167	1.28864	0.710639	1.55846
YJR089W	BIR1	1.15717	0.916965	0.547784	1.02543
YBR270C	BIT2	1.04203	0.912224	0.629094	0.990653
YJL058C	BIT61	1.17641	1.01797	0.919768	1.42801
YKL061W	BLI1	1.23602	0.942271	0.676487	0.88887
YFL007W	BLM10	1.08422	0.811359	0.55407	0.935516
YLR408C	BLS1	1.25896	1.04492	0.547422	0.872329
YER177W	BMH1	1.04151	1.03223	0.956541	1.108
YDR099W	BMH2	1.28741	0.997962	0.573316	0.919831
YPL217C	BMS1	0.709787	0.792989	0.648196	1.1975
YBR141C	BMT2	1.06023	1.14312	0.606448	0.938452
YIL096C	BMT5	0.882449	0.989199	0.814085	2.04708
YLR063W	BMT6	0.899227	0.94201	1.1104	0.920398
YJR025C	BNA1	1.06649	0.864406	0.541679	0.65034
YJR078W	BNA2	0.981429	0.942227	0.759971	0.938186
YJL060W	BNA3	1.38863	0.898202	0.698598	1.07527
YBL098W	BNA4	0.964717	1.17604	0.350498	0.704727
YLR231C	BNA5	0.877141	0.901433	1.0944	0.83824
YFR047C	BNA6	0.959731	1.00893	2.02424	0.648812
YDR428C	BNA7	0.994763	0.896144	0.806926	0.951322
YNL271C	BNI1	1.12738	0.945768	0.608274	1.03484
YNL233W	BNI4	1.1762	1.00055	0.616251	1.10712
YNL166C	BNI5	0.961509	1.20647	1.11208	1.14371
YIL159W	BNR1	1.03427	1.02329	0.677579	1.38466
YGR230W	BNS1	0.987459	0.796465	1.10281	1.00478
YBL085W	BOI1	1.09234	1.2059	0.67197	0.922447
YER114C	BOI2	1.14589	1.05309	0.700506	1.02547
YLR267W	BOP2	1.07672	1.28175	0.672292	1.2405
YNL042W	BOP3	0.903241	0.905742	0.964445	0.9652
YNL275W	BOR1	1.14093	0.933645	0.592718	0.979887
YLR078C	BOS1	0.968789	0.889717	0.724622	0.841291
YCR032W	BPH1	1.10581	0.85272	0.723584	0.845269
YDL141W	BPL1	1.20309	1.01637	0.977567	1.10688
YLL015W	BPT1	1.18633	0.87385	0.801071	0.982359
YDL074C	BRE1	1.02658	0.932461	0.535529	1.06413
YLR015W	BRE2	0.965864	0.989408	0.615676	1.11616
YDL231C	BRE4	1.14323	0.982301	0.701769	0.996163
YNR051C	BRE5	0.898205	0.865386	0.582078	0.962075
YGR246C	BRF1	1.10198	1.03766	1.03794	0.998676
YHR036W	BRL1	1.13982	1.07007	0.753433	1.26049
YBL097W	BRN1	1.08967	1.026	0.80639	1.12233
YPL084W	BRO1	1.23513	0.972655	0.548181	1.00673
YGL007W	BRP1	1.12375	0.867193	0.906317	1.2672
YPR057W	BRR1	1.06462	0.922659	0.620997	0.900617
YER172C	BRR2	1.07539	0.902022	0.595018	1.11338
YGL247W	BRR6	1.0946	0.89695	0.544182	1.18498
YOL077C	BRX1	0.688814	0.964965	0.620921	1.29912
YDL037C	BSC1	0.698988	0.747815	1.41941	1.55353
YDR275W	BSC2	0.974401	1.0582	0.823202	1.07483
YLR465C	BSC3	1.94143	1.33732	0.399765	2.06735
YNL269W	BSC4	1.00182	1.05031	0.586204	0.856919
YNR069C	BSC5	0.963749	1.24662	1.03852	1.07032
YOL137W	BSC6	1.16312	0.915167	0.78702	0.989669
YBR290W	BSD2	1.11085	1.03769	0.544673	1.13114
YPR171W	BSP1	1.16989	1.09735	0.713582	1.04685
YFL025C	BST1	1.09821	0.881408	0.665022	1.09914
YGR142W	BTN2	0.343584	0.929716	1.05084	1.29218
YPL069C	BTS1	1.13942	1.07071	0.619587	0.924855
YDR252W	BTT1	1.45591	1.32382	0.664103	0.978576
YGR188C	BUB1	1.13256	1.10807	0.739938	1.93356
YMR055C	BUB2	1.07239	0.947246	0.899353	1.06191
YOR026W	BUB3	0.987383	0.881863	1.14535	0.968847
YGL174W	BUD13	1.05865	1.01593	0.629594	1.11705
YAR014C	BUD14	1.10951	0.903825	0.402613	0.795483
YEL029C	BUD16	0.940952	0.96068	0.695061	1.30452
YNR027W	BUD17	1.09953	1.00694	1.30294	1.1465
YJL188C	BUD19	0.987179	0.92584	0.898268	0.869303
YKL092C	BUD2	1.14852	1.01361	0.565487	1.023
YLR074C	BUD20	0.711218	0.92189	0.711115	0.968722
YOR078W	BUD21	0.822356	1.00124	0.468627	0.821547
YMR014W	BUD22	0.791318	0.901104	0.667096	1.24829
YCR047C	BUD23	0.874044	0.896722	0.537403	0.825767
YER014C-A	BUD25	0.809624	0.490373	0.631628	1.81703
YDR241W	BUD26	0.822846	0.879204	0.339742	0.750145
YFL023W	BUD27	0.813973	1.01355	0.598764	1.01522
YLR062C	BUD28	0.932572	0.922839	1.21817	0.700366
YCL014W	BUD3	1.10773	0.981847	0.752483	1.25471
YDL151C	BUD30	1.25858	0.81329	1.52525	3.85882
YCR063W	BUD31	0.751219	0.786036	0.781372	2.1705
YGR262C	BUD32	0.959416	1.05097	0.7491	0.907296
YJR092W	BUD4	0.994571	0.960558	1.49534	1.545
YCR038C	BUD5	1.08236	1.04927	0.804957	1.05833
YLR319C	BUD6	1.15347	1.02117	0.940931	1.06392
YOR299W	BUD7	0.821045	0.964512	0.975013	0.948775
YLR353W	BUD8	1.00746	0.929665	1.28548	1.25116
YGR041W	BUD9	1.09929	1.00329	1.18786	1.44308
YDL099W	BUG1	0.943072	0.934073	0.6263	0.811552
YMR275C	BUL1	1.15684	0.884299	0.555352	0.847745
YML111W	BUL2	1.23285	0.926106	0.737793	1.10154
YLR226W	BUR2	1.12235	1.02223	0.619455	0.942561
YER159C	BUR6	0.975187	0.995442	0.826319	1.02029
YNL305C	BXI1	1.21242	1.13471	0.906525	0.969501
YKL005C	BYE1	0.997684	0.88009	0.805217	0.990121
YHR114W	BZZ1	1.08961	0.957689	0.815046	1.06735
YDR531W	CAB1	1.07431	1.06765	0.648427	1.26677
YIL083C	CAB2	1.12107	1.10694	1.05769	1.18426
YKL088W	CAB3	1.16224	1.06718	0.644421	1.18698
YGR277C	CAB4	1.06424	0.885165	0.672636	1.07091
YDR196C	CAB5	1.13735	0.959083	0.899175	0.986362
YML102W	CAC2	0.982173	0.930054	0.698951	1.11908
YDR423C	CAD1	1.02782	1.09168	0.791728	1.07123
YNL278W	CAF120	1.2326	0.944814	0.986905	1.31334
YGR134W	CAF130	1.02664	0.865581	0.569229	0.960467
YFL028C	CAF16	1.07411	1.0489	1.0012	1.38437
YOR276W	CAF20	0.998753	1.05536	0.705914	1.22317
YKR036C	CAF4	1.07496	0.958111	0.742806	1.11775
YNL288W	CAF40	1.13383	1.07357	0.756944	0.986008
YER048C	CAJ1	1.10059	0.832915	0.527949	0.897494
YFL029C	CAK1	1.15373	1.04437	1.14846	1.16221
YPL048W	CAM1	1.05339	0.889137	0.891363	0.999914
YEL063C	CAN1	1.19475	1.16134	0.97732	1.04852
YKL007W	CAP1	1.14521	0.923252	0.697856	0.788485
YIL034C	CAP2	1.07584	0.89885	0.876093	1.06539
YPL111W	CAR1	1.2114	1.68606	0.980042	1.08685
YLR438W	CAR2	1.34554	1.39377	0.835859	0.988528
YML042W	CAT2	1.29683	1.23338	1.12635	1.18455
YOR125C	CAT5	1.08332	0.930815	0.981227	1.22224
YMR280C	CAT8	1.13645	1.05051	0.775688	1.21432
YGR036C	CAX4	0.902009	1.04149	0.895888	0.973587
YPL178W	CBC2	1.15286	1.05879	0.64567	1.01518
YJR060W	CBF1	1.0779	1.09133	0.667487	0.875736
YGR140W	CBF2	0.808336	0.884133	0.823232	1.0595
YLR175W	CBF5	0.773941	0.964159	0.812291	1.57067
YNL161W	CBK1	1.30081	0.918369	0.716646	0.982023
YJL209W	CBP1	1.05887	0.992498	0.629405	1.23716
YHL038C	CBP2	1.19849	0.914417	0.530555	0.862174
YPL215W	CBP3	1.1223	0.933436	0.487771	0.990149
YGR174C	CBP4	1.12982	0.773727	0.717042	0.869093
YBR120C	CBP6	1.2165	0.984039	0.657501	0.740781
YIL043C	CBR1	0.941151	0.912398	0.889083	0.863655
YDL069C	CBS1	1.11256	0.890544	0.666722	1.0375
YDR197W	CBS2	1.08889	1.04546	0.974468	1.18798
YKL208W	CBT1	1.00524	0.958519	0.706661	1.04257
YER168C	CCA1	1.16007	1.04772	0.740739	1.09715
YLR220W	CCC1	1.07027	0.961624	0.584306	0.970102
YDR270W	CCC2	1.22691	1.11073	0.479509	0.885003
YKL011C	CCE1	1.13547	0.972218	0.667497	1.11366
YGR217W	CCH1	1.02399	0.820735	0.577931	0.916011
YPR025C	CCL1	1.09144	1.12101	0.663353	0.99217
YGR150C	CCM1	1.12633	0.81113	0.351266	1.06766
YKR066C	CCP1	1.12135	1.1875	0.842615	0.929282
YAL021C	CCR4	1.16389	0.879116	1.25559	1.22847
YMR038C	CCS1	0.99495	0.929954	0.540405	0.823944
YIL142W	CCT2	0.903196	0.914255	0.701576	0.976005
YJL014W	CCT3	0.942246	0.87714	0.626649	0.98352
YDL143W	CCT4	0.951822	0.78038	0.845501	1.03302
YJR064W	CCT5	0.995518	0.911317	0.710483	0.986495
YDR188W	CCT6	0.982925	0.790158	0.809673	0.96822
YJL111W	CCT7	1.06577	0.851872	0.882324	1.16774
YJL008C	CCT8	1.01568	0.939277	0.699386	1.0083
YLR110C	CCW12	1.00638	0.924354	1.1361	1.13781
YLR390W-A	CCW14	1.1289	0.796175	0.672722	0.896745
YBR131W	CCZ1	1.02856	0.954235	0.752976	1.22753
YLR307W	CDA1	0.926406	1.04113	0.682448	1.05677
YLR308W	CDA2	1.57593	1.16699	1.99784	1.30705
YDR182W	CDC1	1.20824	1.03182	0.597398	1.05566
YCR002C	CDC10	1.10332	0.998655	0.667358	0.927801
YJR076C	CDC11	1.12818	1.06886	0.805431	0.976744
YHR107C	CDC12	1.05371	1.10702	0.954858	1.59639
YLR215C	CDC123	1.08803	1.11583	1.08768	1.25975
YDL220C	CDC13	1.18692	0.970663	1.08633	1.23606
YFR028C	CDC14	1.071	1.10056	0.845444	1.43594
YAR019C	CDC15	1.17871	1.0886	0.557433	1.02625
YKL022C	CDC16	1.03885	0.922126	0.609046	0.982801
YAL038W	CDC19	0.934133	1.07122	1.40695	1.17345
YGL116W	CDC20	1.12841	0.917964	0.85297	1.4748
YOR074C	CDC21	0.930404	1.35294	1.01807	1.07691
YHR166C	CDC23	1.07055	0.948213	0.529023	1.18095
YAL041W	CDC24	1.10888	0.925971	0.700028	1.00766
YLR310C	CDC25	1.15763	1.08269	0.668274	1.11177
YFR036W	CDC26	1.2911	1.11575	0.797179	1.01886
YBL084C	CDC27	1.21398	1.16398	0.519094	0.984664
YBR160W	CDC28	1.07554	1.13727	0.896898	1.32986
YLR314C	CDC3	1.19304	0.993475	0.853973	1.1469
YOR257W	CDC31	1.05029	1.03782	0.81566	1.01972
YOL139C	CDC33	0.945309	1.02822	0.63068	1.02123
YDR054C	CDC34	1.11392	1.01676	0.684399	1.02763
YDL165W	CDC36	1.075	1.03955	0.524848	0.903391
YDR168W	CDC37	1.19766	0.919982	0.623796	0.927498
YCR093W	CDC39	1.21333	1.02015	0.619406	1.04262
YFL009W	CDC4	1.21077	1.01107	0.515202	0.886956
YDR364C	CDC40	1.0949	0.956962	0.535583	0.909937
YLR229C	CDC42	1.10298	1.06322	0.604233	0.915081
YGL155W	CDC43	1.0959	0.96757	0.765755	1.13339
YLR103C	CDC45	1.16943	1.3074	1.62454	1.39991
YDL126C	CDC48	1.08672	0.869262	0.726279	0.875291
YMR001C	CDC5	1.00866	0.893907	0.971938	1.21385
YCR094W	CDC50	1.07433	0.905547	0.707337	0.883643
YDL132W	CDC53	1.09217	0.907044	0.672684	0.989749
YGL190C	CDC55	1.24216	1.12087	0.592812	0.941325
YJL194W	CDC6	0.857475	1.09024	0.898663	1.06983
YPL160W	CDC60	0.948604	0.859253	0.793745	1.4896
YDL017W	CDC7	1.20384	1.22461	0.606146	1.19966
YLR418C	CDC73	1.01817	0.985499	1.0181	1.49885
YJR057W	CDC8	0.978937	1.10679	0.640308	0.812053
YDL164C	CDC9	1.17227	1.092	1.48158	0.838082
YLR245C	CDD1	1.11504	1.03432	0.753745	0.931793
YGL003C	CDH1	1.09889	0.906349	0.628437	0.96605
YBR029C	CDS1	1.1923	0.920525	0.597069	0.952911
YMR213W	CEF1	1.01015	1.01088	0.889849	1.04021
YGL130W	CEG1	1.03995	1.1145	0.566744	0.985492
YER061C	CEM1	0.81213	0.791229	0.698278	0.710362
YMR168C	CEP3	1.03765	0.99585	0.630186	1.0679
YPL228W	CET1	1.14996	1.06664	0.771113	0.873769
YOR112W	CEX1	1.13291	0.995111	1.42461	1.77027
YIL003W	CFD1	0.899491	0.899184	0.597483	0.96368
YDR301W	CFT1	1.08916	0.897754	0.631884	1.14461
YLR115W	CFT2	1.03799	0.949246	1.00316	1.04529
YML036W	CGI121	1.0456	1.05272	0.619144	1.22699
YGL029W	CGR1	0.72049	1.08728	1.14865	1.44259
YCL064C	CHA1	1.57004	1.52916	0.990136	0.73079
YLR098C	CHA4	1.07017	1.00688	0.590464	0.860271
YGL206C	CHC1	1.21975	1.0051	0.821566	1.13214
YER164W	CHD1	1.00399	0.992434	0.646951	1.03864
YBR274W	CHK1	1.18276	1.06296	0.700658	0.985375
YPL008W	CHL1	1.12355	1.04099	1.14957	1.21137
YDR254W	CHL4	1.18675	0.874561	0.625688	1.00539
YER026C	CHO1	1.10148	0.998956	0.530145	0.93516
YGR157W	CHO2	1.25329	0.870656	0.71334	0.921395
YNL192W	CHS1	1.11031	0.855023	0.428369	0.997547
YBR038W	CHS2	1.03557	0.90631	1.12714	1.07637
YBR023C	CHS3	1.17143	0.668851	0.472881	0.918958
YLR330W	CHS5	1.09457	0.896918	0.77853	1.09968
YJL099W	CHS6	1.10516	0.876265	0.730691	0.900685
YHR142W	CHS7	1.02323	0.824542	0.921962	1.14535
YER030W	CHZ1	0.973552	0.903771	0.886621	0.931894
YDR267C	CIA1	0.964678	0.961487	0.838437	1.15453
YHR122W	CIA2	1.09222	1.06192	0.674111	0.989672
YHR052W	CIC1	0.714259	1.19908	0.867252	1.25699
YMR198W	CIK1	1.03977	0.934259	0.804907	1.26304
YOR349W	CIN1	0.966045	0.916533	1.07061	1.36146
YPL241C	CIN2	1.03043	1.12324	0.906161	1.44768
YMR138W	CIN4	0.971851	0.992759	0.539219	0.777064
YOR028C	CIN5	0.90559	1.3119	0.735699	1.35265
YEL061C	CIN8	1.23821	1.15382	0.920674	1.08469
YGR207C	CIR1	1.04047	0.877757	0.578611	0.572336
YOR356W	CIR2	1.17276	1.02691	0.370596	0.863679
YJL158C	CIS3	0.838727	0.974719	0.8123	0.970124
YNR001C	CIT1	1.17726	1.10322	1.09087	1.1808
YCR005C	CIT2	1.24789	1.46432	0.817844	1.19655
YPR001W	CIT3	1.34043	1.31587	1.94791	1.00784
YIL035C	CKA1	1.02011	0.91267	0.71849	1.24568
YOR061W	CKA2	1.03796	0.932987	0.721586	1.02907
YGL019W	CKB1	1.01096	0.966681	0.874947	0.988916
YOR039W	CKB2	1.21251	1.03599	0.671748	1.00862
YLR133W	CKI1	1.22445	0.963774	0.657988	0.880706
YBR135W	CKS1	1.03432	1.13615	0.722575	0.950223
YNL298W	CLA4	1.15564	0.85749	1.05226	1.56017
YGR108W	CLB1	0.774183	0.99466	1.3846	1.28004
YPR119W	CLB2	1.04426	0.929091	2.68779	1.49887
YDL155W	CLB3	1.06638	1.14349	0.545067	1.01281
YLR210W	CLB4	1.09419	1.13653	1.26506	1.70783
YPR120C	CLB5	1.07445	1.05908	1.45425	1.15755
YGR109C	CLB6	0.795958	1.10289	0.733076	3.54785
YGR167W	CLC1	1.1294	0.867302	0.705192	0.856659
YGR110W	CLD1	1.23909	1.26388	0.57711	1.16499
YLR117C	CLF1	1.1251	1.03735	0.521839	0.950653
YGL215W	CLG1	1.3196	1.0164	0.594636	1.06195
YMR199W	CLN1	1.09489	0.945371	1.34387	1.41531
YPL256C	CLN2	1.00962	1.15726	1.33915	1.11283
YAL040C	CLN3	0.999209	1.0109	1.77388	1.25905
YOR250C	CLP1	1.01998	1.01299	1.25093	1.06051
YMR012W	CLU1	1.02389	0.747594	1.14768	1.48518
YKL137W	CMC1	1.09522	0.846064	0.61625	1.00423
YBL059C-A	CMC2	0.986991	0.84114	0.632495	0.899024
YMR194C-B	CMC4	1.09258	0.961134	0.850144	1.00753
YBR109C	CMD1	1.01287	0.951317	0.621758	0.883949
YFR014C	CMK1	1.13223	0.910263	0.895601	1.07434
YOL016C	CMK2	1.06222	0.952471	1.01119	1.07462
YML057W	CMP2	1.14505	0.926629	0.559305	0.865865
YDL156W	CMR1	1.28023	1.00142	0.963467	1.00418
YPR013C	CMR3	1.10255	0.942453	1.30658	0.759837
YLR003C	CMS1	0.891065	0.91151	0.640834	1.24646
YLR433C	CNA1	1.23302	0.920717	0.931191	1.15584
YKL190W	CNB1	1.02133	0.895041	0.602883	0.842998
YAL058W	CNE1	1.08041	0.915427	0.920958	1.07148
YDR357C	CNL1	1.13908	0.905098	0.55455	0.879889
YNL225C	CNM67	1.17251	0.986389	0.761442	1.27543
YFR046C	CNN1	0.985189	0.950319	0.89637	1.15171
YBR155W	CNS1	0.914604	1.03936	0.812369	1.44418
YIL157C	COA1	1.12365	0.845229	0.645035	0.884513
YPL189C-A	COA2	1.09514	1.10901	0.811893	0.905077
YJL062W-A	COA3	1.05468	0.846613	0.581964	0.898542
YLR218C	COA4	0.929187	0.755616	0.705526	0.852445
YMR244C-A	COA6	1.08773	0.747354	0.544247	0.764028
Q0105	COB	1.07761	0.695579	1.24344	0.91654
YLL050C	COF1	1.06059	0.978539	0.583499	0.842915
YGL223C	COG1	0.998237	0.998336	0.625145	1.08867
YGR120C	COG2	1.09889	1.00508	0.700174	1.25913
YER157W	COG3	1.13384	1.04717	0.820537	1.2781
YPR105C	COG4	1.20597	0.898285	0.7961	1.20266
YNL051W	COG5	1.13515	1.01559	0.611926	1.16343
YNL041C	COG6	1.15394	0.991366	0.502846	0.951258
YGL005C	COG7	1.14518	0.87276	0.587188	0.900844
YML071C	COG8	0.940236	0.865699	1.04763	0.995132
YER130C	COM2	0.899244	0.898691	0.805036	0.79911
YDL145C	COP1	1.20146	0.983072	1.13187	1.52163
YBR003W	COQ1	1.12787	0.90059	0.696844	0.905819
YOL008W	COQ10	1.0732	1.04768	0.718561	1.22984
YNR041C	COQ2	0.947112	1.00224	0.293194	0.81284
YOL096C	COQ3	1.1646	0.924105	1.58375	1.17447
YDR204W	COQ4	1.08113	0.915813	1.0228	0.889699
YML110C	COQ5	1.11801	0.845895	1.97602	1.0184
YGR255C	COQ6	1.10133	0.919917	0.835286	0.95275
YGL119W	COQ8	1.09697	0.853249	0.853728	1.18999
YLR201C	COQ9	1.15824	0.975884	0.892739	1.10498
YBL045C	COR1	1.17079	0.991622	0.968457	0.959202
YNL336W	COS1	1.07216	1.04224	0.800028	0.835786
YNR075W	COS10	0.921434	0.757548	0.806111	0.615163
YBR203W	COS111	0.995139	1.00388	0.838483	1.47408
YGL263W	COS12	1.06694	0.896362	0.93285	1.10024
YBR302C	COS2	1.03643	0.870676	1.24529	0.81688
YML132W	COS3	1.03643	0.870676	1.24529	0.81688
YFL062W	COS4	1.05907	1.07885	0.729835	1.13442
YJR161C	COS5	0.923392	0.990812	0.515703	0.64644
YGR295C	COS6	1.07657	0.928333	0.627297	0.822605
YDL248W	COS7	0.986431	0.861645	1.26504	0.8818
YHL048W	COS8	1.10445	0.971851	0.697896	0.739584
YKL219W	COS9	1.29649	1.03723	0.819393	1.08917
YOR316C	COT1	1.32198	1.12599	0.609844	1.0967
Q0045	COX1	0.41461	0.321684	0.248904	0.28255
YPL172C	COX10	1.18015	0.966633	0.504956	0.880076
YPL132W	COX11	1.0895	0.913887	0.817087	1.02332
YLR038C	COX12	1.12456	0.944394	0.644967	0.984426
YGL191W	COX13	1.03843	1.06902	0.871984	0.971608
YML129C	COX14	1.05508	0.8785	0.937548	0.991
YER141W	COX15	1.05805	0.928791	0.59681	0.971193
YJL003W	COX16	1.25664	0.946417	0.569947	0.842716
YLL009C	COX17	0.981373	0.803652	0.826936	0.759916
YGR062C	COX18	0.979963	0.927216	0.460972	0.780198
YLL018C-A	COX19	1.05851	1.11841	1.15732	1.18022
Q0250	COX2	0.575372	0.932002	0.477417	0.402031
YDR231C	COX20	1.16047	0.979605	0.862257	0.85959
YHR116W	COX23	1.08732	0.864829	0.519735	0.849906
YDR119W-A	COX26	1.08693	1.15713	0.97018	1.28899
Q0275	COX3	1.65798	0.777979	1.87948	1.10774
YGL187C	COX4	1.15299	0.983982	0.596312	0.914587
YNL052W	COX5A	1.13672	1.07821	0.703051	0.945156
YIL111W	COX5B	1.08759	1.01874	0.796325	1.12395
YHR051W	COX6	1.16445	1.0038	0.588786	0.943389
YMR256C	COX7	1.18474	1.02268	0.606821	0.88673
YLR395C	COX8	1.16458	1.00261	0.654154	0.995526
YDL067C	COX9	1.21259	0.944583	0.907366	0.965122
YKL179C	COY1	1.18986	0.997498	0.878413	1.15102
YOR303W	CPA1	0.957388	1.00974	0.705391	1.09359
YJR109C	CPA2	1.15624	1.19191	0.676933	1.20977
YGR247W	CPD1	1.07325	1.12465	0.695461	0.867453
YDR155C	CPR1	1.0062	0.933163	1.00081	1.04946
YHR057C	CPR2	1.06394	0.885311	0.755471	0.853646
YML078W	CPR3	1.02393	0.879441	0.872317	1.01375
YCR069W	CPR4	1.15727	0.902502	0.762191	0.984288
YDR304C	CPR5	1.04681	0.950927	0.726309	0.974812
YLR216C	CPR6	0.762834	0.938727	1.05951	1.17064
YJR032W	CPR7	1.03204	0.927643	1.1965	1.61571
YNR028W	CPR8	1.12457	0.989588	0.741087	1.36974
YJL172W	CPS1	1.25451	0.97892	1.56649	0.996517
YNL130C	CPT1	1.14606	0.925436	0.757187	1.24382
YOR100C	CRC1	1.16757	1.44284	1.03663	1.522
YDL142C	CRD1	1.11487	1.02916	0.971125	1.20349
YDR223W	CRF1	1.31105	1.01644	0.783447	0.868023
YHR209W	CRG1	1.12575	0.614176	0.712129	0.883235
YGR189C	CRH1	1.00934	0.932669	0.615864	1.35576
YGR218W	CRM1	1.20759	0.987205	0.66594	1.05002
YLR429W	CRN1	1.03032	0.828673	1.09277	1.27799
YHR146W	CRP1	1.09014	1.15209	0.829024	0.926678
YLR213C	CRR1	1.53707	1.2712	0.758205	0.83544
YOR031W	CRS5	1.07553	0.991805	1.18946	0.975125
YOL063C	CRT10	1.12556	0.957434	0.733115	1.0428
YNL027W	CRZ1	1.16916	1.07579	0.465826	1.0563
YLR241W	CSC1	1.16606	0.876372	0.511661	0.761531
YGL238W	CSE1	1.16496	0.932122	0.697007	1.36743
YNR010W	CSE2	1.0438	1.09704	0.938644	1.75123
YKL049C	CSE4	0.981519	1.27923	0.713122	1.07147
YLR087C	CSF1	1.09827	0.89053	0.991198	1.11365
YBR036C	CSG2	1.12768	0.984119	0.7011	1.00496
YBR161W	CSH1	1.06537	1.04148	1.15033	1.17284
YMR025W	CSI1	1.11315	1.1519	0.39077	0.770148
YOL007C	CSI2	1.00589	1.08801	0.903871	1.25361
YNL232W	CSL4	0.962349	0.91516	0.605214	1.02391
YCR086W	CSM1	1.06093	1.23085	0.602274	0.899401
YIL132C	CSM2	1.20013	0.764989	1.16314	1.52602
YMR048W	CSM3	1.12955	1.17492	0.591304	1.14611
YPL200W	CSM4	0.881054	1.00119	0.53516	0.854043
YDR179C	CSN9	1.17286	0.918983	0.560459	1.14299
YLR380W	CSR1	1.09765	1.0833	0.909213	1.1381
YPR030W	CSR2	1.05867	1.12036	0.953131	1.18985
YBR042C	CST26	1.22356	1.19257	1.06826	1.06816
YIL036W	CST6	1.1425	0.993887	0.639232	0.935805
YLR394W	CST9	1.09888	0.748928	0.451062	1.09216
YDR256C	CTA1	1.08996	1.30368	0.813895	0.922622
YMR094W	CTF13	1.32127	1.09364	0.835398	0.952684
YMR078C	CTF18	1.08746	1.09881	0.993887	1.15869
YPL018W	CTF19	1.13589	0.88496	0.813112	1.03838
YLR381W	CTF3	1.27486	1.05591	0.740144	1.08491
YPR135W	CTF4	1.16244	1.0165	1.27625	1.65973
YHR191C	CTF8	1.01428	0.941493	0.558142	0.934775
YDR151C	CTH1	0.725624	1.01572	1.06446	1.12135
YPL181W	CTI6	1.07273	0.880963	0.798243	1.15066
YKL139W	CTK1	1.07551	0.991108	0.584175	0.995504
YJL006C	CTK2	0.93154	1.20041	0.723683	0.970096
YML112W	CTK3	1.04681	1.03869	0.556418	1.07799
YMR180C	CTL1	1.15095	0.891457	0.837017	0.926005
YHR109W	CTM1	0.958686	0.828821	0.730668	1.20631
YBR291C	CTP1	1.06495	1.0853	0.49903	0.986999
YPR124W	CTR1	1.38798	1.1344	1.13366	1.28569
YHR175W	CTR2	0.948874	0.932554	0.764312	0.989824
YLR411W	CTR3	1.40382	1.13627	0.573887	1.00204
YCR054C	CTR86	1.08945	1.00176	0.996396	1.11161
YOL145C	CTR9	1.11511	1.00227	0.841602	1.2388
YLR286C	CTS1	1.28534	1.25895	1.7067	0.927959
YDR371W	CTS2	1.18165	0.929487	0.880009	1.04006
YGR088W	CTT1	1.18913	1.26464	0.534957	0.87182
YMR264W	CUE1	1.06899	0.854456	0.792126	0.872146
YKL090W	CUE2	1.03795	0.955424	0.677213	0.925877
YGL110C	CUE3	1.07077	0.945669	1.1109	1.09041
YML101C	CUE4	0.959105	0.877658	0.757356	0.998149
YOR042W	CUE5	1.16812	0.950793	0.840404	0.944534
YGR003W	CUL3	1.08468	1.03446	0.647944	0.907283
YHR053C	CUP1-1	0.646286	0.832604	1.50345	0.8949
YHR055C	CUP1-2	0.646286	0.832604	1.50345	0.8949
YGL166W	CUP2	1.06835	0.963827	0.722373	1.07664
YPL177C	CUP9	1.28005	1.14325	0.866428	1.10606
YPR158W	CUR1	0.788795	1.03839	0.90299	1.11365
YMR240C	CUS1	1.01514	1.0064	0.712796	0.913666
YNL286W	CUS2	0.978929	0.839637	1.14413	0.89282
YNL155W	CUZ1	0.935097	0.903859	0.678531	0.76743
YDR163W	CWC15	0.962461	0.954302	0.60077	0.992525
YDL209C	CWC2	1.06103	1.03427	0.636997	1.22888
YDR482C	CWC21	0.993655	0.868472	0.59596	0.990518
YGR278W	CWC22	1.03329	1.02149	0.92952	1.48234
YGL128C	CWC23	1.09196	1.07635	0.630016	0.994635
YLR323C	CWC24	0.955043	0.974637	0.943291	0.967442
YNL245C	CWC25	1.02915	0.958066	0.689949	1.12698
YPL064C	CWC27	1.00892	1.05418	0.521692	1.20869
YGL027C	CWH41	1.16236	0.917468	1.33467	1.67524
YCR017C	CWH43	1.14334	0.943704	0.939471	1.10325
YKL096W	CWP1	1.22819	0.81442	0.502851	0.816321
YKL096W-A	CWP2	0.926704	1.0912	1.25478	1.0939
YML054C	CYB2	1.07223	1.10805	0.699391	1.09314
YNL111C	CYB5	0.781293	0.945709	0.335342	0.673631
YJR048W	CYC1	0.907828	1.01989	0.710046	1.13948
YOR037W	CYC2	1.05097	0.973613	0.680349	1.05194
YAL039C	CYC3	0.975772	0.861376	0.779565	1.08131
YEL039C	CYC7	1.07574	1.1044	0.765055	1.02966
YBR112C	CYC8	1.09359	0.982009	0.781478	1.12342
YDL117W	CYK3	1.04149	0.841983	0.94751	1.24143
YDR430C	CYM1	1.06012	0.776535	0.497283	0.863215
YJL005W	CYR1	1.1766	0.966258	0.997681	1.20428
YAL012W	CYS3	1.45451	1.07734	0.724826	1.06234
YGR155W	CYS4	1.24261	0.937433	0.630839	0.910075
YOR065W	CYT1	1.09427	1.1032	0.72741	0.954986
YKL087C	CYT2	1.08401	0.838775	0.547862	0.951929
YDR016C	DAD1	1.08111	0.912827	0.442777	0.932472
YKR083C	DAD2	1.10938	1.02107	1.26211	1.71063
YBR233W-A	DAD3	1.08462	1.11062	0.626191	1.06773
YDR320C-A	DAD4	0.965692	0.865592	0.85424	0.968241
YML070W	DAK1	1.23385	1.00001	0.719504	0.859834
YFL053W	DAK2	1.32608	1.15645	1.25779	1.29338
YIR027C	DAL1	1.45009	1.37793	2.02614	1.69057
YIR029W	DAL2	1.16809	0.996934	1.2449	0.778388
YIR032C	DAL3	1.21212	1.05176	0.844558	0.985825
YIR028W	DAL4	1.61469	0.947612	1.05007	0.819394
YJR152W	DAL5	1.0955	1.00235	1.0471	0.94763
YIR031C	DAL7	1.23209	1.22007	1.00047	1.26018
YKR034W	DAL80	1.89435	1.56527	0.378596	1.23319
YIR023W	DAL81	1.17239	1.08361	0.71188	1.15788
YNL314W	DAL82	1.13795	1.08133	0.564913	0.948404
YGR113W	DAM1	1.13055	1.00824	0.984105	1.0507
YJR150C	DAN1	0.760298	0.548664	0.100944	0.173169
YJR151C	DAN4	1.13477	0.810996	0.842472	0.948507
YPL170W	DAP1	1.01304	0.748743	0.694189	0.750948
YHR028C	DAP2	1.17747	0.981444	0.655866	1.07667
YJL149W	DAS1	1.1336	0.971919	0.715234	0.907524
YDR020C	DAS2	0.964315	0.976961	0.457063	0.596688
YML113W	DAT1	0.847889	0.905825	0.541311	1.06911
YGR092W	DBF2	1.05896	0.985315	0.978965	1.41753
YPR111W	DBF20	1.31648	1.01707	0.607264	1.07968
YDR052C	DBF4	1.13581	1.08593	0.69616	1.13301
YPL119C	DBP1	1.00998	1.2363	0.800891	1.13291
YDL031W	DBP10	0.741956	0.898651	0.690976	1.44876
YNL112W	DBP2	0.655261	1.02277	0.779688	1.22199
YGL078C	DBP3	0.766488	0.957043	0.636812	1.1577
YOR046C	DBP5	1.00756	1.0185	0.913511	1.22249
YNR038W	DBP6	1.04633	0.934266	0.747799	1.44815
YKR024C	DBP7	0.801521	1.08014	0.778531	1.3119
YHR169W	DBP8	0.795682	0.920239	0.630963	1.54545
YLR276C	DBP9	0.76859	0.927903	0.881084	1.39116
YKL149C	DBR1	1.17516	1.17277	1.13367	1.11854
YCL016C	DCC1	1.12659	0.994538	0.683916	0.959111
YHR144C	DCD1	0.974805	1.31407	1.24601	0.899929
YIR030C	DCG1	0.967717	1.06834	0.512814	1.41074
YOR180C	DCI1	0.948641	1.24613	0.90817	0.908709
YLR128W	DCN1	1.16711	0.884172	0.579612	0.85028
YOL149W	DCP1	1.09329	1.11548	1.01887	1.30205
YNL118C	DCP2	1.09941	1.01817	0.738114	0.986408
YLR361C	DCR2	1.22218	0.934406	0.580849	1.00284
YLR270W	DCS1	1.21091	0.982857	0.836527	0.945422
YOR173W	DCS2	1.15091	0.95303	0.88164	0.986314
YFR012W	DCV1	2.14065	0.836647	1.00634	0.391712
YKL046C	DCW1	1.10803	0.905099	0.608472	1.02917
YPL194W	DDC1	1.4052	1.05226	0.979157	1.09917
YER143W	DDI1	1.05534	0.926392	0.625447	0.813994
YFL061W	DDI2	NA	NA	NA	NA
YNL335W	DDI3	1.21191	0.917261	1.35313	1.01425
YOR163W	DDP1	1.12137	0.924542	0.768274	0.882927
YOL052C-A	DDR2	1.30226	1.27538	0.864967	0.930756
YMR173W	DDR48	1.30945	1.05834	1.3567	1.0679
YOR204W	DED1	0.902535	1.0754	1.19791	1.04129
YHR019C	DED81	0.918412	0.885688	1.14028	1.76611
YKL054C	DEF1	1.02791	0.908351	0.625901	0.919857
YFL001W	DEG1	0.925295	1.03772	0.966331	1.19581
YAL013W	DEP1	1.12769	0.979935	0.591672	1.03705
YBR201W	DER1	1.07076	1.04512	0.601825	0.827123
YDR051C	DET1	1.01097	0.969477	0.694403	0.939039
YIL049W	DFG10	1.07857	1.03545	0.689708	0.955086
YOR030W	DFG16	1.19721	0.957199	0.611823	0.983595
YMR238W	DFG5	1.21601	0.733607	0.472379	0.952825
YDR411C	DFM1	1.01045	1.05667	0.752439	0.850035
YOR236W	DFR1	0.889669	0.967999	0.697423	1.11671
YOR245C	DGA1	1.12923	0.989758	0.56177	0.995953
YOR311C	DGK1	1.01101	0.875164	0.611014	0.894086
YNL130C-A	DGR1	1.14403	1.07801	0.737576	0.912166
YKL121W	DGR2	1.17227	0.993705	0.575929	0.942114
YDL160C	DHH1	1.27471	1.24972	0.704302	1.01151
YKL078W	DHR2	0.85666	0.937382	1.39834	1.51208
YMR316W	DIA1	1.01825	1.115	0.762064	1.19406
YOR080W	DIA2	1.17838	0.989021	0.969024	1.00203
YDL024C	DIA3	1.20747	0.82085	0.815312	1.15662
YHR011W	DIA4	1.06078	0.797543	1.45871	1.15913
YPR082C	DIB1	1.06413	0.915443	0.603376	1.04781
YLR348C	DIC1	0.613826	0.63939	0.907859	1.05007
YKR035W-A	DID2	0.397163	1.00536	0.339413	0.088939
YKL002W	DID4	1.01127	0.90524	0.693111	0.808393
YGR227W	DIE2	1.17492	0.907277	0.460269	0.975318
YLR437C	DIF1	1.03954	1.28436	0.858716	1.01177
YPL049C	DIG1	1.14073	0.999	0.914552	1.08528
YDR480W	DIG2	1.03718	1.11058	0.719459	0.937765
YPL266W	DIM1	0.734321	1.03916	0.52186	1.12894
YDR263C	DIN7	1.10511	0.934052	0.97318	1.04511
YLR129W	DIP2	0.800143	0.799177	0.894894	1.57696
YPL265W	DIP5	1.27558	1.57562	1.02769	1.80791
YOL021C	DIS3	1.04832	0.949492	0.776145	1.181
YDR403W	DIT1	1.21414	0.986888	0.792893	0.932085
YDR402C	DIT2	1.05209	0.72359	0.733794	0.971206
YIR004W	DJP1	1.00255	0.887933	0.589722	1.01095
YDL174C	DLD1	1.00166	0.852792	0.804627	1.13491
YDL178W	DLD2	1.08799	1.00674	0.395972	0.714848
YEL071W	DLD3	1.11186	1.13043	0.858937	1.10235
YJL065C	DLS1	0.974434	0.88483	0.556226	1.08448
YMR126C	DLT1	1.10582	0.934867	0.453155	0.796296
YHR115C	DMA1	1.10283	0.949097	0.64813	0.960864
YNL116W	DMA2	1.13792	1.15021	0.616638	0.883513
YER179W	DMC1	1.15734	1.2162	0.897168	1.03706
YMR211W	DML1	1.04891	0.943715	0.712633	1.20179
YHR164C	DNA2	1.07975	0.82051	0.832686	1.16864
YER166W	DNF1	1.04248	0.88862	0.64969	1.11871
YDR093W	DNF2	0.997377	0.873191	0.742859	1.21012
YMR162C	DNF3	1.22273	0.989496	0.661167	1.05231
YOR005C	DNL4	1.09445	0.905955	0.750889	1.07644
YLL001W	DNM1	1.17388	0.938069	0.58933	0.931421
YKL213C	DOA1	1.1608	0.839041	1.97896	1.39244
YDR069C	DOA4	1.12396	1.10063	0.66809	0.993421
YGL240W	DOC1	1.16312	1.04312	0.949371	1.3172
YHR044C	DOG1	0.976667	0.865528	1.05652	0.872519
YHR043C	DOG2	1.09651	0.895959	0.855414	1.05189
YNL001W	DOM34	0.982052	1.00448	0.695773	0.985643
YDR273W	DON1	0.914511	0.854362	1.43011	0.931294
YDR141C	DOP1	1.25281	0.944416	0.663751	1.00098
YDR068W	DOS2	0.93017	0.897187	0.603819	0.704391
YDR440W	DOT1	1.22594	1.1132	1.15551	1.38176
YIL010W	DOT5	1.22042	0.828178	0.622586	1.10029
YER088C	DOT6	1.1294	1.07236	1.06604	0.95447
YJL090C	DPB11	1.18091	1.05716	0.495976	1.0172
YPR175W	DPB2	1.0533	1.00174	1.04964	1.22351
YBR278W	DPB3	0.960324	0.993392	0.613286	0.843461
YDR121W	DPB4	1.0592	1.15909	0.653595	1.03939
YIL103W	DPH1	0.972221	1.02509	0.623941	1.04874
YKL191W	DPH2	0.877096	0.98509	0.755714	1.16223
YLR172C	DPH5	0.851978	0.958379	0.708236	0.914239
YLR143W	DPH6	0.968798	0.95309	1.45698	1.69906
YDR294C	DPL1	1.00704	0.923793	0.738402	0.814528
YPR183W	DPM1	0.913526	1.04846	0.846908	1.0162
YDR284C	DPP1	1.00845	1.07028	0.49564	0.761999
YLL018C	DPS1	1.08384	0.998657	1.16972	1.09571
YKR071C	DRE2	0.971388	0.983876	0.759424	0.984232
YGR093W	DRN1	0.943301	0.949243	0.891217	1.17168
YLL008W	DRS1	0.753502	0.80967	0.544183	1.03898
YAL026C	DRS2	1.2116	0.987365	0.916557	1.22229
YOL073C	DSC2	1.09488	0.987666	0.651548	1.09095
YOR223W	DSC3	1.02907	0.965419	0.907373	0.926565
YGL196W	DSD1	1.03431	0.915764	1.5803	1.40253
YER124C	DSE1	1.23271	1.37367	1.21361	0.82341
YHR143W	DSE2	1.15075	1.29366	1.67941	0.926888
YOR264W	DSE3	0.932196	1.10184	1.05384	0.889868
YNR067C	DSE4	0.935561	1.24876	1.36184	0.665235
YEL070W	DSF1	1.12897	0.492413	1.65135	1.46184
YBR007C	DSF2	1.17139	0.904668	1.19687	1.07802
YMR276W	DSK2	1.06321	0.791553	0.650061	0.83966
YNL258C	DSL1	1.08235	0.979165	0.413831	0.889112
YIR010W	DSN1	1.14353	1.01439	0.711101	1.27253
YMR287C	DSS1	1.13435	0.864645	0.522224	1.06178
YPR017C	DSS4	1.01999	0.961098	0.493852	0.815548
YGL043W	DST1	0.950962	0.986146	0.710493	1.03337
YDL219W	DTD1	0.979808	1.03403	1.20329	1.80214
YBR180W	DTR1	1.22949	0.978624	0.570284	0.785011
YOL087C	DUF1	1.15657	0.949736	0.81518	1.04434
YFR044C	DUG1	1.15519	0.960519	1.06234	0.963464
YBR281C	DUG2	1.55321	0.878912	0.830935	1.21272
YNL191W	DUG3	1.36913	1.14661	0.731528	0.995697
YDL101C	DUN1	1.19045	1.28027	1.01881	1.02177
YGL061C	DUO1	1.03216	1.14849	0.897505	1.07127
YBR208C	DUR1	1.67746	1.5168	1.26694	0.995703
YHL016C	DUR3	1.05581	0.869425	0.722902	0.950963
YML080W	DUS1	0.910156	1.07535	0.920897	1.43121
YLR401C	DUS3	0.782483	0.996256	1.49779	1.15614
YLR405W	DUS4	0.973362	1.01788	0.93931	1.0302
YBR252W	DUT1	0.913161	1.248	0.973691	1.22939
YDR370C	DXO1	1.04494	0.985624	0.712585	1.27534
YKR054C	DYN1	0.995838	0.866546	0.984726	1.36295
YDR424C	DYN2	1.051	0.960486	0.760281	0.95806
YMR299C	DYN3	1.07381	0.891619	0.832749	0.937538
YHR068W	DYS1	0.846208	1.00134	0.840908	1.44292
YDR359C	EAF1	1.1152	0.743331	0.787104	0.937594
YPR023C	EAF3	1.01913	0.867448	0.740039	0.97683
YEL018W	EAF5	1.15481	0.978142	0.665947	0.881861
YJR082C	EAF6	1.08438	0.9008	0.731731	0.920421
YNL136W	EAF7	0.95941	0.835984	1.15722	0.789112
YKL204W	EAP1	1.15636	0.998552	0.843896	1.35459
YMR171C	EAR1	1.07987	1.00033	0.75887	1.07869
YKL172W	EBP2	0.721592	1.02839	0.600654	1.35594
YDR206W	EBS1	1.07249	0.9879	0.647505	1.08968
YLR284C	ECI1	1.26825	1.08805	0.959774	0.787341
YGR146C	ECL1	0.857593	0.850641	0.893368	0.827253
YAL059W	ECM1	0.792205	1.07274	0.752379	1.45024
YEL030W	ECM10	1.15729	0.947879	0.717169	1.00547
YDR446W	ECM11	0.887122	0.549015	1.74669	1.24905
YHR021W-A	ECM12	0.943267	0.428809	1.18317	0.817393
YBL043W	ECM13	1.0045	1.22356	1.04617	1.52612
YHR132C	ECM14	1.20985	1.08677	0.566323	0.930522
YBL001C	ECM15	1.08415	0.87909	0.714796	0.83694
YMR128W	ECM16	0.74795	1.00346	0.807671	1.46847
YDR125C	ECM18	1.2407	1.0577	0.668391	0.893385
YLR390W	ECM19	1.05288	0.92149	0.663727	0.93045
YBR065C	ECM2	1.12347	1.07043	0.606042	1.00772
YBL101C	ECM21	1.1457	1.01407	0.648594	1.0331
YLR228C	ECM22	1.23449	0.995097	0.459197	0.690132
YPL021W	ECM23	1.33435	0.832732	0.558977	0.900037
YJL201W	ECM25	1.12075	1.0355	0.605438	0.999272
YJR106W	ECM27	1.16777	1.01361	0.710909	1.09232
YHL030W	ECM29	1.12763	0.745658	0.582152	0.848814
YOR092W	ECM3	1.08806	1.05178	0.720683	1.15132
YLR436C	ECM30	1.26565	1.14086	0.805415	1.11367
YBR176W	ECM31	1.11616	0.942145	0.83903	1.45472
YER176W	ECM32	1.0084	0.905111	0.858702	1.1155
YBR078W	ECM33	0.9386	1.01212	1.12506	1.43136
YHL043W	ECM34	1.10903	0.943667	1.45091	0.949811
YLR299W	ECM38	1.20104	0.903931	1.16126	1.10946
YKR076W	ECM4	1.06275	0.733394	0.588889	0.873691
YMR176W	ECM5	1.15299	0.846792	1.44114	1.09677
YLR443W	ECM7	1.09827	0.812609	0.611916	0.858007
YBR076W	ECM8	1.25775	0.905605	0.764612	0.804828
YKR004C	ECM9	1.27652	1.02616	0.351985	0.715449
YFR027W	ECO1	1.01148	1.20029	2.54741	1.96496
YGR007W	ECT1	1.05687	0.954211	0.65044	0.903244
YGL222C	EDC1	1.00382	1.02169	0.63207	0.983206
YER035W	EDC2	0.828112	1.1419	1.1815	1.29789
YEL015W	EDC3	1.02744	1.04482	0.800643	1.06346
YBL047C	EDE1	1.18241	0.913573	0.739807	1.09392
YBR033W	EDS1	1.18734	0.843454	1.35297	1.02078
YPL095C	EEB1	0.737363	1.05247	1.12363	1.10477
YAL003W	EFB1	0.662451	0.994637	1.07832	1.07038
YGR271C-A	EFG1	0.722204	1.2547	0.93119	1.13755
YHL039W	EFM1	0.914291	0.90369	0.823232	1.07245
YBR271W	EFM2	0.834829	0.882225	0.563938	1.31154
YJR129C	EFM3	0.966384	1.10188	1.19636	1.04192
YIL064W	EFM4	0.984681	0.950176	0.685909	1.03525
YGR001C	EFM5	0.935254	0.986116	0.554087	0.809821
YMR212C	EFR3	1.0336	0.917025	0.784755	1.30161
YOR133W	EFT1	0.960117	0.956299	0.992684	1.19664
YDR385W	EFT2	0.991334	0.884727	1.15673	1.34724
YPL037C	EGD1	1.0175	1.10505	0.923363	1.20759
YHR193C	EGD2	0.907344	1.14811	1.37556	1.17816
YNL327W	EGT2	0.790422	1.28811	1.09554	1.05777
YDR036C	EHD3	1.2057	0.87091	0.990692	1.10872
YBR177C	EHT1	1.13526	0.989638	1.0942	1.02518
YMR031C	EIS1	1.11259	1.13065	0.784567	1.14821
YDR147W	EKI1	1.29723	1.08535	0.653563	1.03784
YNL230C	ELA1	1.01099	1.0506	0.615027	1.0932
YPL046C	ELC1	1.09404	0.976536	0.544788	1.01062
YKL160W	ELF1	1.06568	0.987554	0.476617	0.924711
YOR144C	ELG1	1.1404	1.00971	0.847364	1.11383
YKL048C	ELM1	1.109	1.05499	0.620687	1.02272
YJL196C	ELO1	1.09255	1.00428	0.814618	0.956678
YCR034W	ELO2	1.01851	1.02735	1.1245	0.856315
YLR372W	ELO3	0.819876	1.06606	1.02477	1.85766
YGR200C	ELP2	0.886539	0.815283	0.968694	1.48608
YPL086C	ELP3	0.854154	0.913654	0.574252	1.05582
YPL101W	ELP4	1.02442	0.977101	0.653934	1.02845
YMR312W	ELP6	1.09288	0.981211	0.603447	0.938409
YCL045C	EMC1	1.1347	1.011	1.02507	1.3273
YJR088C	EMC2	1.14474	1.0833	0.826726	1.0477
YKL207W	EMC3	1.01732	0.978586	0.660806	0.948702
YGL231C	EMC4	1.09854	0.955856	0.88347	1.06228
YIL027C	EMC5	1.05042	0.985592	1.55309	1.31869
YLL014W	EMC6	0.968076	0.953307	0.733266	0.833458
YLR186W	EMG1	0.797846	0.940855	1.15594	1.08362
YDR512C	EMI1	1.00116	0.805	0.615154	0.862048
YDR516C	EMI2	1.18411	1.24865	1.38957	1.58992
YGL200C	EMP24	1.06179	0.915479	0.807639	1.17324
YLR080W	EMP46	1.07933	0.974021	0.999856	0.925381
YFL048C	EMP47	1.13047	0.934795	0.721803	1.2281
YER140W	EMP65	1.05811	0.88153	0.486655	0.962255
YLR083C	EMP70	0.993172	0.991467	0.96407	1.25981
YNL313C	EMW1	0.947456	0.883454	1.14208	1.62181
YDR040C	ENA1	1.05903	1.39257	0.639973	1.19118
YDR039C	ENA2	0.76118	2.54693e-06	0.270425	0.738448
YDR038C	ENA5	1.0924	1.29073	0.731139	1.2613
YOL158C	ENB1	1.15601	0.966801	0.921746	1.12628
YNL084C	END3	1.21258	0.940511	0.718473	0.823606
YGR254W	ENO1	0.970407	1.0151	1.74325	1.21243
YHR174W	ENO2	0.824378	1.09809	0.959906	0.789397
YBR247C	ENP1	0.667775	1.06751	0.773707	1.32166
YGR145W	ENP2	0.778941	0.871656	0.609071	1.42343
YDL161W	ENT1	1.15923	0.92737	1.08881	1.16034
YLR206W	ENT2	1.22091	0.950565	0.80095	0.994152
YJR125C	ENT3	1.217	0.913254	0.671614	0.99218
YLL038C	ENT4	1.07412	1.06227	1.05714	0.972782
YDR153C	ENT5	1.03257	1.01612	1.02551	0.982927
YLR065C	ENV10	1.04303	0.8915	1.45697	1.48751
YGR071C	ENV11	1.19483	1.05902	0.806575	1.3685
YPL236C	ENV7	1.05422	1.09227	0.677787	0.799275
YOR246C	ENV9	1.04956	0.982899	0.780547	1.01749
YNL080C	EOS1	1.21968	1.15679	0.656878	0.992377
YFL024C	EPL1	1.05519	0.975113	0.633013	0.927496
YMR124W	EPO1	1.13536	0.84643	0.56665	0.976541
YIL005W	EPS1	1.18098	0.920008	0.600291	1.03634
YHR123W	EPT1	1.14948	1.03307	0.610828	0.843641
YMR049C	ERB1	0.731364	0.936071	0.892636	1.74871
YHR032W	ERC1	1.05826	1.01202	0.995301	1.2278
YDR414C	ERD1	1.01533	0.905842	0.622471	1.1172
YBL040C	ERD2	1.07968	0.940257	0.373814	0.893266
YLR246W	ERF2	1.12382	0.926335	0.707674	0.926994
YGR175C	ERG1	1.05175	0.994385	0.54159	1.01859
YPL028W	ERG10	0.882939	0.889655	0.356932	0.63174
YHR007C	ERG11	1.00424	1.03155	0.498798	0.792749
YMR208W	ERG12	0.890171	0.911034	0.443857	0.82672
YML126C	ERG13	0.693708	0.774434	0.291047	0.803104
YMR202W	ERG2	0.765468	0.917305	0.604556	0.845633
YJL167W	ERG20	0.925307	0.935795	0.600206	0.886179
YNL280C	ERG24	0.934799	0.881153	0.923591	0.765184
YGR060W	ERG25	0.890274	1.03486	0.520803	0.871685
YGL001C	ERG26	0.901418	0.965117	0.452869	0.791221
YLR100W	ERG27	0.888429	0.865625	1.33561	0.920205
YER044C	ERG28	0.994156	0.978297	0.558696	0.863621
YMR134W	ERG29	1.00756	1.09509	0.42022	0.825857
YLR056W	ERG3	0.944673	0.974574	0.374948	0.688413
YGL012W	ERG4	1.03184	0.90844	0.505964	0.914946
YMR015C	ERG5	0.846595	0.971765	0.427344	0.844455
YML008C	ERG6	0.802831	0.978015	0.551284	0.85543
YHR072W	ERG7	0.850512	0.830703	0.486687	1.007
YMR220W	ERG8	0.927095	0.842495	0.511296	0.919265
YHR190W	ERG9	1.10277	1.00635	0.564335	0.959428
YPL096C-A	ERI1	1.11917	1.0437	0.616952	0.677775
YFR041C	ERJ5	1.00676	0.967547	0.837178	1.45521
YML130C	ERO1	0.692267	0.835227	0.992003	0.992484
YAR002C-A	ERP1	0.969791	1.0606	1.21565	1.12312
YAL007C	ERP2	1.03153	0.929888	0.999141	0.893711
YDL018C	ERP3	1.12618	1.11469	0.428134	0.823101
YOR016C	ERP4	1.14168	1.07354	0.676978	1.17023
YHR110W	ERP5	1.08286	0.950108	0.589651	1.02804
YGL002W	ERP6	1.11609	0.879341	0.604288	0.811416
YOR393W	ERR1	1.26835	0.869647	1.89293	1.03722
YPL281C	ERR2	1.26835	0.869647	1.89293	1.03722
YMR323W	ERR3	1.44892	0.943738	1.83719	0.929691
YCR075C	ERS1	1.11189	1.03834	1.41357	1.61441
YBR239C	ERT1	0.994669	0.866589	1.23373	0.997815
YGR029W	ERV1	0.98006	0.957223	0.61214	0.895584
YGL054C	ERV14	1.06084	0.995318	0.737747	1.12064
YBR210W	ERV15	1.13837	0.96183	1.07552	1.10827
YPR037C	ERV2	1.08267	0.889108	0.736076	0.938057
YML012W	ERV25	1.05693	0.88966	0.768207	0.926705
YGR284C	ERV29	1.04597	0.866731	0.589095	1.08538
YML067C	ERV41	1.09103	0.893781	0.704617	1.03825
YAL042W	ERV46	1.01927	0.938426	0.756335	0.988741
YOR244W	ESA1	1.09602	1.1013	0.46037	1.07746
YNL125C	ESBP6	1.11116	1.03735	1.00197	1.04818
YMR219W	ESC1	1.16794	0.974087	0.89922	1.33862
YDR363W	ESC2	1.03718	0.993034	0.631497	0.847448
YOL017W	ESC8	1.09185	1.14296	0.835092	1.17123
YDR365C	ESF1	0.744938	0.827384	0.670775	1.3367
YNR054C	ESF2	0.670451	1.11866	0.70354	1.43522
YIL151C	ESL1	1.10095	0.836623	0.631855	1.06726
YKR096W	ESL2	1.2571	0.997518	0.715532	1.03868
YGR098C	ESP1	1.19917	1.04215	0.626834	1.35055
YJR017C	ESS1	1.03388	0.903759	0.642484	0.910983
YLR233C	EST1	1.10023	1.02513	0.7856	1.30009
YLR318W	EST2	1.18972	1.08068	1.48951	1.6833
YIL009C-A	EST3	1.1249	0.867478	0.678416	0.902473
YHL010C	ETP1	1.14352	0.843893	0.616523	0.899917
YBR026C	ETR1	1.15596	0.967701	1.54353	0.880346
YOR051C	ETT1	0.852792	1.04034	0.664244	0.902319
YDR518W	EUG1	1.04671	0.874363	0.930344	1.23519
YLR300W	EXG1	0.907303	0.591675	1.05773	0.949269
YDR261C	EXG2	1.05224	0.868427	1.03856	1.1
YOR033C	EXO1	1.07636	1.00102	0.947251	1.29079
YBR163W	EXO5	1.1361	0.932218	0.642824	1.06536
YJL085W	EXO70	1.20683	1.03762	1.04163	1.00629
YBR102C	EXO84	1.02158	0.926497	1.00169	0.868613
YOR317W	FAA1	1.09459	1.16734	0.785456	1.08466
YER015W	FAA2	1.12678	1.24702	0.837925	0.815414
YIL009W	FAA3	1.20695	0.928108	0.605535	0.914528
YMR246W	FAA4	1.24654	1.0511	0.242229	0.304368
YFR019W	FAB1	1.13956	0.919852	0.778681	1.07723
YDL045C	FAD1	1.10119	0.975924	0.597937	1.03877
YIL019W	FAF1	0.863284	0.767873	0.54801	0.970036
YDR021W	FAL1	1.04949	1.05947	0.551745	1.53544
YNL023C	FAP1	0.966789	0.799215	0.639693	0.959444
YDL166C	FAP7	0.918326	1.21503	0.614858	0.99983
YJL157C	FAR1	1.17621	0.819183	1.30648	1.05213
YLR238W	FAR10	1.04232	0.92124	0.658777	1.18441
YNL127W	FAR11	1.15163	0.922969	0.763623	1.1049
YMR052W	FAR3	1.13269	1.06115	0.579058	0.949876
YFR008W	FAR7	1.084	1.07022	0.608425	0.940803
YMR029C	FAR8	1.1717	0.993085	0.627664	0.974872
YKL182W	FAS1	1.06744	0.885637	0.498623	0.762618
YPL231W	FAS2	1.02904	0.805641	0.499821	0.650515
YBR041W	FAT1	1.17016	0.983121	0.589803	0.908726
YKL187C	FAT3	1.084	1.24768	0.872165	0.899546
YER183C	FAU1	0.988472	1.00041	0.63551	1.16846
YKL060C	FBA1	0.909025	1.1277	1.11915	1.2453
YLR377C	FBP1	0.959575	0.982605	1.23064	1.7375
YJL155C	FBP26	1.14745	0.927885	0.569381	0.947673
YDR339C	FCF1	0.831166	1.05566	0.49324	1.08863
YLR051C	FCF2	0.789323	1.01785	0.699138	1.31618
YMR277W	FCP1	1.097	0.951433	1.03976	1.26249
YPR062W	FCY1	0.975663	0.963113	0.759738	0.933589
YER056C	FCY2	0.88345	0.933338	0.854877	0.927301
YER060W	FCY21	0.871174	0.772015	0.483052	0.863142
YER060W-A	FCY22	1.02168	0.705068	0.61417	0.881141
YDR539W	FDC1	1.12369	0.883709	1.34701	1.19362
YOR388C	FDH1	0.913238	2.23843	1.97299	1.068
YPL275W	FDH2	NA	NA	NA	NA
YCR028C	FEN2	1.17552	1.00372	0.675185	0.96852
YBR101C	FES1	0.448882	1.01494	1.06364	1.26388
YMR058W	FET3	1.15351	0.946062	1.07313	0.918912
YMR319C	FET4	1.29626	1.24123	0.903776	0.885273
YFL041W	FET5	1.12337	0.986269	0.699151	1.04468
YOR390W	FEX1	1.09912	1.14486	0.806902	1.11401
YPL279C	FEX2	1.13923	1.13601	0.995354	1.64071
YPR104C	FHL1	1.04179	1.09981	0.59498	1.06372
YGR131W	FHN1	1.04429	1.0023	0.46834	0.750031
YBR040W	FIG1	1.0215	0.816396	0.779223	2.52943
YCR089W	FIG2	1.23925	1.20946	0.930433	0.935246
YNL325C	FIG4	1.20955	0.967743	0.660386	0.98597
YDR130C	FIN1	0.9526	1.07537	0.648535	1.09
YJR093C	FIP1	1.15683	1.09351	0.627124	0.921119
YER032W	FIR1	1.02688	0.973737	1.15371	1.58989
YIL065C	FIS1	1.0853	0.8415	0.78107	1.01147
YDR534C	FIT1	1.1054	0.964726	1.23198	1.02357
YOR382W	FIT2	1.70534	1.10664	2.41983	1.12269
YOR383C	FIT3	1.13497	1.03556	1.42037	0.869746
YIL131C	FKH1	0.981616	1.05246	0.883534	1.31549
YNL068C	FKH2	1.04478	1.00835	0.965543	1.16836
YLR342W	FKS1	0.879802	0.598995	0.805368	1.14977
YMR306W	FKS3	1.16501	0.881774	1.02877	1.06522
YPL221W	FLC1	1.17833	1.01468	0.963267	1.25796
YAL053W	FLC2	1.19971	0.915554	0.488796	1.02369
YGL139W	FLC3	1.31033	1.16556	0.487105	0.882277
YLR404W	FLD1	1.20043	0.892735	1.99514	1.13067
YAR050W	FLO1	0.985534	0.770206	1.59985	1.24691
YKR102W	FLO10	1.17168	0.883387	0.964231	1.53904
YIR019C	FLO11	1.18268	0.744086	2.00459	1.42809
YHR211W	FLO5	1.01266	0.884433	1.47879	1.25144
YER109C	FLO8	1.29756	0.940816	0.898982	1.04018
YAL063C	FLO9	1.05882	0.733835	1.66171	1.08139
R0010W	FLP1	NA	NA	NA	NA
YBR008C	FLR1	1.1436	0.958001	0.988536	1.12836
YIL134W	FLX1	1.02453	0.849799	0.98034	0.793485
YIL098C	FMC1	1.10561	0.886526	0.745017	0.944201
YDR236C	FMN1	1.11951	0.902723	0.620794	0.858879
YHR176W	FMO1	1.20522	0.774827	0.917097	1.05849
YER182W	FMP10	1.1038	0.893916	0.769629	1.0257
YDR070C	FMP16	1.14439	1.10569	0.92783	0.900981
YBR047W	FMP23	1.15696	0.895976	0.57551	0.861793
YLR077W	FMP25	1.02989	0.896728	0.793581	0.750659
YLR454W	FMP27	1.17515	0.977642	0.441523	0.96346
YPL103C	FMP30	1.07165	0.964937	0.856034	0.956174
YFL046W	FMP32	1.17384	0.981081	0.821012	1.28068
YJL161W	FMP33	1.1177	0.787663	0.616512	0.89789
YPL222W	FMP40	1.18216	1.0659	0.862429	0.867505
YNL168C	FMP41	1.01907	0.926528	1.47791	0.761454
YDL222C	FMP45	1.37083	1.38782	0.623762	0.814708
YKR049C	FMP46	1.21926	0.95437	1.34615	0.944022
YGR052W	FMP48	0.956928	1.21789	0.896466	0.958219
YER004W	FMP52	1.08686	0.837586	0.648233	0.867433
YMR020W	FMS1	1.10579	0.93592	0.905961	1.02908
YBL013W	FMT1	1.12403	1.13265	0.815991	0.973691
YDR110W	FOB1	0.962827	0.968756	0.731285	1.06981
YNL256W	FOL1	1.12502	0.98847	1.22236	1.29307
YGR267C	FOL2	0.99187	0.911636	0.706303	0.962861
YMR113W	FOL3	0.969614	1.00089	0.706682	1.00077
YKR009C	FOX2	0.977027	1.50762	0.953624	0.93143
YNR047W	FPK1	1.18592	1.00969	0.798293	1.05071
YNL135C	FPR1	1.08025	0.955593	0.758218	0.942216
YDR519W	FPR2	0.9211	0.910959	0.718165	0.879445
YML074C	FPR3	0.8537	0.883294	0.87499	1.06813
YLR449W	FPR4	0.82933	0.945026	0.898598	1.27471
YLL043W	FPS1	1.02077	0.981946	0.739036	1.13608
YLL029W	FRA1	1.05101	1.03442	0.911538	1.04444
YGL220W	FRA2	0.935897	0.930343	0.716072	0.798524
YEL047C	FRD1	1.20447	1.04631	1.2196	0.995833
YLR214W	FRE1	1.41013	1.18951	0.62764	1.20597
YKL220C	FRE2	1.27629	0.909566	2.15006	1.41847
YOR381W	FRE3	1.20434	1.02513	1.51436	1.2694
YNR060W	FRE4	1.13234	0.845801	1.12464	1.04524
YOR384W	FRE5	1.23993	1.13472	0.991835	0.867655
YLL051C	FRE6	1.07994	0.951929	0.56749	0.745531
YOL152W	FRE7	1.3257	1.27996	1.38086	1.41587
YLR047C	FRE8	1.19582	1.04945	0.659593	0.763307
YPL141C	FRK1	1.28373	1.04067	1.13005	1.42734
YCL026C-A	FRM2	1.64534	2.7202	0.886414	0.903194
YDR373W	FRQ1	1.0757	0.999691	0.536684	0.813229
YLR060W	FRS1	0.955057	0.954143	1.65273	2.68074
YFL022C	FRS2	0.871405	0.934902	1.0563	1.22085
YOR324C	FRT1	1.06622	0.843419	0.717966	0.893631
YAL028W	FRT2	1.1659	1.08566	0.78958	1.08604
YOR271C	FSF1	0.841776	1.11649	0.900044	1.43941
YHR049W	FSH1	0.974342	1.02922	0.91942	1.47209
YMR222C	FSH2	1.0062	1.11766	0.918434	1.17558
YOR280C	FSH3	1.13269	0.965551	0.62519	1.41595
YBR207W	FTH1	1.17499	1.02032	0.792545	1.12474
YER145C	FTR1	1.13194	1.26353	0.782065	0.851081
YCR076C	FUB1	1.12591	1.036	1.03003	1.00945
YBL042C	FUI1	0.955116	0.675367	0.774445	1.21721
YPL262W	FUM1	1.05412	0.940107	1.79087	1.13237
YAL035W	FUN12	0.851798	0.979322	0.697689	1.05944
YAL008W	FUN14	1.14023	0.736737	0.770779	0.874898
YAL034C	FUN19	1.15055	1.07504	0.923634	1.06579
YAL022C	FUN26	1.06736	0.8574	0.74403	1.28705
YAL019W	FUN30	1.02937	0.934486	0.917123	1.30876
YHR128W	FUR1	0.871678	1.00427	1.18052	1.44633
YBR021W	FUR4	1.06889	0.823892	1.552	1.5893
YCL027W	FUS1	1.15992	0.985311	0.668289	1.04321
YMR232W	FUS2	1.27236	0.876907	0.508554	0.797787
YBL016W	FUS3	1.04763	0.756535	0.866272	0.972977
YDR024W	FYV1	1.24956	0.934502	1.75554	2.19065
YIL097W	FYV10	1.23244	1.0976	0.483482	0.939685
YOR183W	FYV12	1.3444	1.45467	0.787687	0.752265
YHR059W	FYV4	1.0088	0.900176	0.535826	0.981519
YCL058C	FYV5	0.905741	0.887557	0.746254	1.10383
YNL133C	FYV6	1.05752	0.851989	0.564527	0.880141
YLR068W	FYV7	0.746593	1.05293	1.07774	1.53344
YGR196C	FYV8	1.10284	0.94037	0.504326	0.964229
YGL254W	FZF1	1.18407	1.19565	1.01421	0.896558
YBR179C	FZO1	1.22346	0.96644	0.605676	1.01352
YLR088W	GAA1	1.23491	0.914403	0.787464	1.05173
YLR459W	GAB1	1.08271	0.967963	0.43762	0.915784
YOR178C	GAC1	0.989254	0.910286	0.746063	1.08689
YMR250W	GAD1	1.07295	0.879309	2.21155	1.05681
YBR020W	GAL1	1.35569	1.01483	0.907052	1.05011
YBR019C	GAL10	1.33779	1.16583	0.728678	0.931294
YOL051W	GAL11	1.24849	1.24392	0.708928	1.14353
YLR081W	GAL2	0.994798	1.15344	0.767204	0.977956
YDR009W	GAL3	1.12143	0.906704	0.834871	1.39474
YPL248C	GAL4	1.26604	0.964668	0.705334	0.954434
YBR018C	GAL7	1.42368	1.27431	0.464687	1.30996
YML051W	GAL80	1.13442	0.833147	0.825711	1.00859
YER027C	GAL83	1.08056	0.894406	0.692038	1.05766
YKR039W	GAP1	1.51687	1.52688	0.997933	1.83315
YHR089C	GAR1	0.786345	1.10854	0.756356	1.59585
YMR307W	GAS1	0.919907	1.15456	1.26282	1.73215
YLR343W	GAS2	1.18227	0.917834	0.870393	0.769939
YMR215W	GAS3	0.988018	1.26639	1.33159	1.49944
YOL132W	GAS4	1.05769	0.942266	1.01801	0.996097
YOL030W	GAS5	1.1258	0.912397	0.982986	1.19326
YFL021W	GAT1	1.42135	1.36055	0.796109	0.950791
YMR136W	GAT2	1.12304	1.15852	0.905851	1.25786
YLR013W	GAT3	0.651661	0.805021	1.21628	1.01632
YIR013C	GAT4	0.893292	0.841099	0.767818	1.04752
YCL011C	GBP2	0.981165	0.922234	0.807733	0.967867
YOR260W	GCD1	0.91806	0.792273	0.835785	1.30073
YNL062C	GCD10	0.81386	0.8529	0.844863	0.983909
YER025W	GCD11	1.00241	0.913777	0.653683	1.06885
YJL125C	GCD14	0.985021	1.1898	0.930659	1.50472
YGR083C	GCD2	0.944601	1.01107	0.548813	1.08904
YDR211W	GCD6	0.99741	0.907937	0.747068	1.15461
YLR291C	GCD7	1.01702	0.979464	0.727284	0.805884
YER163C	GCG1	1.0436	0.743243	0.887966	0.947997
YGL195W	GCN1	1.02017	0.885589	0.913581	1.63962
YDR283C	GCN2	1.07933	0.818866	0.876323	1.1381
YFR009W	GCN20	1.1427	0.928511	0.96135	1.40203
YKR026C	GCN3	0.919965	1.08362	1.1492	1.1724
YEL009C	GCN4	1.06092	0.80674	1.71198	1.53558
YGR252W	GCN5	1.01614	0.86812	0.83888	1.17518
YPL075W	GCR1	0.897809	0.976979	1.4396	1.52508
YNL199C	GCR2	1.03162	1.05304	0.620222	1.08971
YDL226C	GCS1	1.14659	0.874426	0.924983	1.28648
YDR019C	GCV1	0.806686	0.916533	0.446806	0.687889
YMR189W	GCV2	0.90324	0.840509	0.569884	0.658214
YAL044C	GCV3	0.890034	1.17459	0.423639	0.690088
YOR120W	GCY1	1.21498	1.08236	1.3284	1.00758
YEL042W	GDA1	0.958012	0.947032	0.759027	1.11645
YPR184W	GDB1	1.22917	1.01539	1.00216	1.21595
YPL110C	GDE1	1.17047	0.77272	0.648879	0.825132
YOR375C	GDH1	1.21656	1.46391	1.18457	1.48306
YDL215C	GDH2	1.23866	1.10037	0.834129	1.16388
YAL062W	GDH3	1.00095	0.805617	1.31161	0.927394
YER136W	GDI1	1.16891	0.935634	0.50559	0.90156
YOR355W	GDS1	1.05169	0.845128	0.868307	1.05751
YBR187W	GDT1	1.04884	1.0069	1.09248	1.23364
YJR031C	GEA1	1.07609	1.01537	1.01982	1.67693
YEL022W	GEA2	1.1019	0.945264	0.910097	1.47981
YJR040W	GEF1	1.19385	1.01859	1.45972	0.98691
YAL048C	GEM1	1.1739	1.03667	0.725448	1.1203
YOR205C	GEP3	1.00841	0.911688	0.658815	0.895421
YHR100C	GEP4	1.13475	0.902131	0.483151	1.0046
YLR091W	GEP5	1.03189	1.06049	0.68577	1.10794
YGL057C	GEP7	1.07452	1.15272	0.821702	0.70705
YGL020C	GET1	1.04626	0.998318	1.08933	1.33036
YER083C	GET2	1.12208	0.9635	0.571521	0.913283
YDL100C	GET3	0.966075	0.886335	0.68031	0.847493
YOR164C	GET4	1.11163	0.98099	0.659714	1.00304
YCL073C	GEX1	1.13559	0.747778	1.37459	0.446372
YKR106W	GEX2	3.21237	0.640378	0.465557	1.01751
YKL104C	GFA1	1.11044	0.833445	0.641814	1.02082
YMR255W	GFD1	1.03018	0.971136	0.634548	0.910671
YCL036W	GFD2	0.643371	0.833663	0.697358	0.742475
YDR358W	GGA1	1.12647	1.09852	0.869394	1.03094
YHR108W	GGA2	1.14283	0.989744	1.27099	1.85275
YDL198C	GGC1	1.08887	1.10714	0.772582	1.1754
YHR061C	GIC1	1.13405	1.31025	1.50613	2.51736
YDR309C	GIC2	1.0276	0.926912	1.51824	1.49176
YCL039W	GID7	1.25044	1.08187	0.74494	0.988582
YMR135C	GID8	1.13292	1.024	0.711925	0.928855
YNL153C	GIM3	0.953793	1.09225	0.934335	1.12107
YEL003W	GIM4	1.12515	0.808541	0.89692	1.68187
YML094W	GIM5	0.949773	0.990936	0.785172	1.64642
YDR507C	GIN4	0.984748	1.20281	0.872734	0.804617
YBR045C	GIP1	1.12832	0.915179	1.46041	1.30719
YER054C	GIP2	1.12842	0.969425	0.859131	1.13707
YPL137C	GIP3	1.03558	1.10194	0.731091	1.07718
YAL031C	GIP4	1.19011	1.09189	0.593812	0.919196
YDR152W	GIR2	0.904624	0.92999	0.948396	0.884578
YDR096W	GIS1	1.0859	1.18886	0.526531	1.14212
YNL255C	GIS2	0.969497	0.924701	0.503686	0.877096
YLR094C	GIS3	0.834626	0.95394	0.814344	0.887585
YML006C	GIS4	0.979794	1.06498	0.653312	1.18062
YCR098C	GIT1	1.05981	0.547923	1.43105	0.951405
YEL011W	GLC3	1.01245	0.943542	1.1766	1.23497
YER133W	GLC7	1.17668	0.990272	0.69915	0.954477
YMR311C	GLC8	1.13737	0.997872	0.7357	0.989266
YDL207W	GLE1	0.991831	0.849809	0.631403	0.924519
YER107C	GLE2	1.08296	0.984341	0.996184	1.13861
YKR058W	GLG1	1.07586	1.04795	1.01302	0.92957
YJL137C	GLG2	1.03963	1.0631	1.53322	0.978012
YCL040W	GLK1	1.13659	0.935588	0.964314	1.191
YPR035W	GLN1	1.2912	1.35502	0.806559	0.82386
YER040W	GLN3	1.21749	1.10123	0.622004	0.978055
YOR168W	GLN4	1.07042	1.02289	0.844668	1.29504
YML004C	GLO1	1.19824	0.933084	0.671281	0.793354
YDR272W	GLO2	1.13116	0.914103	0.783016	0.878548
YER122C	GLO3	1.08007	0.973701	0.638416	0.984445
YOR040W	GLO4	1.10483	0.932112	0.905879	0.831538
YPL091W	GLR1	1.1454	0.938116	0.870354	1.05906
YDL171C	GLT1	1.20001	1.238	1.23412	1.35362
YEL046C	GLY1	0.769563	1.1213	0.944958	1.1502
YDR506C	GMC1	1.11	1.00491	0.972178	0.972564
YLR445W	GMC2	1.53677	1.08476	0.558916	0.896347
YKR030W	GMH1	1.34927	0.976468	0.589654	0.865981
YFL017C	GNA1	1.11516	0.928201	0.721876	0.921114
YHR183W	GND1	1.00185	1.13317	1.06072	1.23575
YGR256W	GND2	1.41337	1.17543	1.14683	0.992591
YDR508C	GNP1	1.09047	1.01289	0.889538	1.32099
YOR320C	GNT1	1.09397	0.956473	0.550539	0.801166
YJL184W	GON7	0.982734	0.98391	0.54656	0.900378
YNL274C	GOR1	1.17767	0.888808	1.09222	0.865231
YHL031C	GOS1	1.16494	1.10793	0.681024	0.90534
YMR292W	GOT1	0.999767	0.844596	0.484921	0.88378
YHR005C	GPA1	1.07267	0.908775	1.0667	0.977632
YER020W	GPA2	1.19394	1.09893	0.764004	0.978754
YOR371C	GPB1	1.00511	0.867264	1.12963	1.02264
YAL056W	GPB2	1.16759	1.11638	0.692405	1.08427
YDL022W	GPD1	1.03107	1.20458	1.00571	1.13493
YOL059W	GPD2	0.904165	1.25674	1.11651	1.24233
YGL121C	GPG1	1.27028	0.766839	0.869364	0.878144
YPR160W	GPH1	1.2268	0.837634	2.27225	1.26838
YGR216C	GPI1	1.22857	0.902984	0.518488	0.893243
YGL142C	GPI10	1.12788	0.82381	0.638895	0.867778
YDR302W	GPI11	1.08241	1.18003	0.637124	0.913806
YMR281W	GPI12	0.939653	0.951965	0.633516	1.06859
YLL031C	GPI13	1.12956	1.18465	0.833443	1.17855
YJR013W	GPI14	1.01884	0.925936	0.588924	0.948018
YNL038W	GPI15	1.17203	0.954126	0.60661	1.15404
YHR188C	GPI16	1.15709	0.874657	0.881121	1.05539
YDR434W	GPI17	1.08428	0.939211	0.502131	0.870221
YBR004C	GPI18	1.09581	0.820679	0.369281	1.12913
YDR437W	GPI19	1.36289	1.14175	0.736416	0.950808
YPL076W	GPI2	1.05691	0.986538	0.617166	0.788118
YDR331W	GPI8	1.07514	1.04881	0.691349	1.09241
YKL152C	GPM1	0.871026	0.963414	1.03116	1.0066
YDL021W	GPM2	1.14735	1.08721	1.0795	0.893081
YOL056W	GPM3	1.05204	1.18833	1.23773	1.23397
YOR262W	GPN2	0.988325	0.953965	0.523743	0.952564
YLR243W	GPN3	0.868963	1.05252	0.660623	0.968267
YIL053W	GPP1	1.01261	1.34165	1.57422	2.17334
YER062C	GPP2	1.00616	0.950589	0.803999	0.833634
YDL035C	GPR1	1.14722	0.976066	0.582601	1.04297
YKR067W	GPT2	1.13213	1.01634	0.577244	1.04291
YKL026C	GPX1	1.00102	0.847103	1.37024	0.852807
YBR244W	GPX2	0.844902	0.848277	0.706135	1.43811
YLL035W	GRC3	0.774815	0.850797	1.02335	1.26425
YPL223C	GRE1	1.67104	1.38655	0.705932	0.62731
YOL151W	GRE2	0.960356	1.19096	1.02331	1.29769
YHR104W	GRE3	1.17071	0.848602	0.883818	0.972443
YDR517W	GRH1	1.05368	0.931687	0.922667	1.05565
YJR090C	GRR1	1.16776	1.07195	0.539266	0.990782
YBR121C	GRS1	0.917053	0.940433	0.910564	1.47637
YPR081C	GRS2	1.13534	1.0092	0.784596	0.886168
YCL035C	GRX1	1.00635	0.945909	0.812635	0.860083
YDR513W	GRX2	1.11336	1.0629	0.588394	0.770183
YDR098C	GRX3	1.02318	1.12597	0.52148	0.934953
YER174C	GRX4	0.942084	0.85209	0.440062	0.948027
YPL059W	GRX5	1.06312	0.941457	0.572264	0.906043
YDL010W	GRX6	1.16103	1.02496	1.15296	1.14113
YBR014C	GRX7	1.15956	0.98209	0.594015	0.902329
YLR364W	GRX8	1.52083	1.32883	0.847555	1.16013
YGR032W	GSC2	1.21909	0.991336	1.08655	1.22956
YML048W	GSF2	1.21286	0.997599	0.598311	1.03923
YJL101C	GSH1	1.30163	0.730281	0.543811	0.873282
YOL049W	GSH2	1.16565	0.937741	0.806701	1.16407
YJL103C	GSM1	1.2464	1.10312	0.577657	1.13795
YLR293C	GSP1	0.920381	0.911456	1.13464	0.947768
YOR185C	GSP2	1.21717	0.866444	0.906816	0.954723
YFR015C	GSY1	1.18161	1.04479	1.63509	1.71266
YLR258W	GSY2	1.23131	1.04741	1.31218	1.05516
YDR221W	GTB1	1.11741	0.872491	0.807512	0.970048
YGR102C	GTF1	1.05701	0.884734	0.72412	1.06962
YGR154C	GTO1	1.27353	0.899682	0.55027	0.891955
YMR251W	GTO3	1.03434	1.0409	1.01676	1.22925
YML121W	GTR1	1.11865	0.918711	0.664009	0.798693
YGR163W	GTR2	0.986939	0.944762	0.674037	0.93549
YGL181W	GTS1	1.17955	1.03113	0.742477	0.975944
YIR038C	GTT1	1.1855	0.861147	0.675011	0.889387
YLL060C	GTT2	1.08108	0.941092	0.6056	0.963143
YEL017W	GTT3	1.13585	1.15372	0.673126	0.926528
YMR217W	GUA1	0.820619	0.895452	0.749212	1.15691
YDL238C	GUD1	1.18906	0.849937	0.889096	1.08304
YLR289W	GUF1	1.14287	1.00067	0.666292	0.990931
YDR454C	GUK1	0.963442	0.942074	0.956483	0.966562
YGL084C	GUP1	1.15201	0.983508	0.670275	0.974786
YPL189W	GUP2	0.78692	0.834474	0.677351	0.977748
YGL245W	GUS1	1.04697	0.915018	1.35255	1.50188
YHL032C	GUT1	1.13314	0.902224	0.95535	0.975605
YIL155C	GUT2	1.27162	1.04107	0.911954	1.15538
YIL041W	GVP36	1.05129	1.01091	0.52802	0.823688
YJL091C	GWT1	1.04012	1.04079	0.855201	1.23837
YMR192W	GYL1	1.10493	0.798235	0.796155	0.836625
YOR070C	GYP1	1.07085	1.05348	0.500166	0.910968
YPL249C	GYP5	1.11179	0.97691	1.01171	0.965043
YJL044C	GYP6	1.13246	0.936337	1.2197	1.34057
YDL234C	GYP7	1.14566	1.00156	0.748672	1.24517
YFL027C	GYP8	1.12248	1.07446	1.12245	0.979227
YJL110C	GZF3	1.13227	1.08821	0.710108	1.07212
YPR008W	HAA1	1.06068	0.911643	0.9068	1.13226
YFL031W	HAC1	1.08929	0.962546	1.02501	1.10267
YPR005C	HAL1	1.2151	0.986075	0.648093	0.888214
YJL165C	HAL5	0.958248	1.05458	0.759581	1.55021
YOL089C	HAL9	1.13357	1.13395	0.4546	1.12987
YJR069C	HAM1	0.899359	1.32997	1.2844	1.19783
YLR256W	HAP1	1.11965	0.924712	0.68267	0.979792
YGL237C	HAP2	1.16675	1.06288	0.581367	1.03646
YBL021C	HAP3	1.04819	0.950172	0.627157	0.978034
YKL109W	HAP4	1.06478	0.84918	1.29693	1.26155
YOR358W	HAP5	1.0766	0.811755	0.720437	1.04361
YMR290C	HAS1	0.826379	0.766468	1.13064	1.63496
YPL001W	HAT1	1.05103	1.06229	0.91651	1.20502
YEL056W	HAT2	1.09422	0.996434	0.853929	1.05911
YCL026C-B	HBN1	1.37083	0.759367	0.542711	0.68634
YKR084C	HBS1	1.11248	0.920271	0.620078	0.934433
YDL223C	HBT1	1.25158	1.11978	0.938795	1.02018
YJL033W	HCA4	0.817907	0.86201	0.941363	1.38708
YNL281W	HCH1	0.845696	0.88152	0.999468	0.966047
YCR065W	HCM1	1.29302	0.952947	1.15516	1.67652
YLR192C	HCR1	0.914162	0.913408	0.717548	1.08783
YKL017C	HCS1	1.08868	0.947605	0.924847	1.06298
YNL021W	HDA1	1.09371	0.957365	0.868687	1.04252
YDR295C	HDA2	1.10095	1.04876	0.873102	1.23803
YPR179C	HDA3	1.05422	0.997545	0.843739	1.05241
YDR014W-A	HED1	1.29445	1.04773	1.3017	0.848754
YNL014W	HEF3	1.37373	1.33932	1.33271	1.13798
YDR458C	HEH2	1.1233	0.962838	0.839381	0.960189
YBL032W	HEK2	1.06559	1.0883	0.716005	0.906377
YKR017C	HEL1	1.13271	1.09858	0.476925	1.11675
YDR266C	HEL2	1.09751	0.993411	0.737876	1.04859
YDR232W	HEM1	1.14676	0.974344	0.948184	1.03334
YDR047W	HEM12	0.895298	0.905154	1.50037	1.08589
YDR044W	HEM13	1.23745	0.893746	1.45469	1.71441
YER014W	HEM14	1.28084	0.974952	1.20406	1.23292
YOR176W	HEM15	1.11435	0.965507	1.26411	0.800909
YGL040C	HEM2	1.03884	0.901235	0.753058	0.940379
YDL205C	HEM3	1.16115	0.819189	1.28846	1.35314
YOR278W	HEM4	0.975471	0.981223	0.76218	0.867526
YOR227W	HER1	1.23409	0.975144	0.672018	0.998132
YMR293C	HER2	1.116	0.901417	0.61769	0.837191
YOR237W	HES1	1.53203	0.953672	0.998243	0.504881
YMR207C	HFA1	0.991622	0.915188	0.543903	1.01259
YMR110C	HFD1	1.16261	1.06514	0.642535	0.892708
YPL254W	HFI1	1.10473	1.04	0.735115	1.26852
YGL251C	HFM1	1.21665	1.07363	0.640705	0.797675
YGR187C	HGH1	0.816124	0.966658	1.31001	1.43256
YBR009C	HHF1	1.25204	1.39051	1.11838	0.87932
YNL030W	HHF2	1.27925	1.28534	1.062	1.15973
YPL127C	HHO1	1.13627	1.3013	0.917084	1.08396
YBR010W	HHT1	1.18344	1.3101	0.970613	0.941109
YNL031C	HHT2	1.18143	1.13645	1.32775	0.988885
YEL059W	HHY1	1.2449	1.06153	0.896229	0.973542
YLL022C	HIF1	1.00053	0.955564	0.777397	1.04437
YDR317W	HIM1	1.22878	0.898916	0.767051	0.788193
YGR191W	HIP1	0.9251	0.883071	0.965739	1.08627
YBL008W	HIR1	1.12393	0.954909	0.504841	1.01235
YOR038C	HIR2	1.07598	1.04373	0.751113	1.25222
YJR140C	HIR3	1.11775	0.934208	1.08347	1.24091
YER055C	HIS1	0.869668	1.19815	0.841738	1.0536
YFR025C	HIS2	1.05696	0.867723	1.40607	1.57471
YOR202W	HIS3	0.823897	1.04018	0.786613	0.684018
YCL030C	HIS4	0.869723	0.970589	0.881736	0.812666
YIL116W	HIS5	1.02218	1.06566	0.671436	1.17257
YIL020C	HIS6	1.06121	0.947184	0.877021	1.25078
YBR248C	HIS7	0.757892	1.08757	0.50642	0.68247
YJR055W	HIT1	1.14167	1.00295	0.681004	1.36992
YDR420W	HKR1	1.03316	0.701152	0.541792	0.841599
YMR161W	HLJ1	1.10811	1.00323	0.987202	1.29254
YDR528W	HLR1	1.09323	1.02009	1.16617	0.803885
YER057C	HMF1	1.02735	0.922227	0.716723	0.839107
YML075C	HMG1	0.918171	0.847235	0.40286	0.801643
YLR450W	HMG2	1.23415	0.95222	0.89709	0.819742
YOL095C	HMI1	1.32668	0.944335	1.41423	1.50307
YCL066W	HMLALPHA1	0.9421	0.634705	0.912375	0.830057
YCL067C	HMLALPHA2	1.0502	0.990195	0.676826	1.02939
YDR174W	HMO1	1.00968	0.858926	0.921664	1.18468
YCR097W	HMRA1	1.28657	0.779492	0.559541	0.967788
YCR096C	HMRA2	0.916579	0.894699	0.684666	0.944209
YOR032C	HMS1	0.922591	0.911847	0.882541	0.989384
YJR147W	HMS2	1.15428	0.780841	1.03481	0.971124
YBR034C	HMT1	0.913272	0.916131	0.904593	1.31459
YLR205C	HMX1	1.11115	1.31731	0.871628	1.25725
YGL077C	HNM1	1.01239	1.05591	0.585537	0.964499
YDL125C	HNT1	1.07959	0.96784	0.571616	0.79861
YDR305C	HNT2	1.01998	0.878715	0.635016	1.04285
YOR258W	HNT3	1.16992	0.898263	0.500636	0.95364
YDL227C	HO	1.07486	1.12869	0.689685	0.93361
YJR075W	HOC1	1.03059	1.02198	0.747395	0.939402
YMR032W	HOF1	1.00371	0.921755	0.880459	1.20335
YLR113W	HOG1	1.08712	0.956387	0.759804	1.07287
YNR055C	HOL1	1.07894	0.849366	1.04215	1.21152
YDR158W	HOM2	0.97449	1.09458	0.916994	1.28119
YER052C	HOM3	1.04231	1.1901	1.7095	1.93802
YJR139C	HOM6	1.02547	0.922491	0.850186	1.13401
YIL072W	HOP1	1.22643	0.929539	0.806978	0.763744
YGL033W	HOP2	1.47294	1.0763	1.08744	NA
YMR251W-A	HOR7	1.24834	1.11108	0.808442	1.00487
YPR068C	HOS1	1.10571	1.09161	0.92247	1.03715
YGL194C	HOS2	1.09473	0.994762	0.671288	0.962128
YPL116W	HOS3	1.088	1.04274	0.718267	1.33268
YIL112W	HOS4	1.04642	0.896334	0.670717	0.992728
YMR172W	HOT1	1.04131	1.03099	0.764702	1.02448
YKL084W	HOT13	1.06751	1.06538	1.19263	1.33155
YPR193C	HPA2	1.10101	0.867083	0.407939	0.82629
YEL066W	HPA3	0.955059	0.834345	1.17005	0.858785
YBR215W	HPC2	1.13393	0.935838	0.689613	1.23147
YOL155C	HPF1	0.858484	0.783118	1.56817	1.94884
YIL110W	HPM1	0.958444	0.930598	0.777088	1.2639
YDR138W	HPR1	1.17232	0.940289	1.26151	1.4663
YDR399W	HPT1	0.69204	1.2313	0.611144	0.75666
YNL004W	HRB1	0.986708	1.01258	1.07279	1.21059
YOL013C	HRD1	1.07767	0.977671	0.522862	0.910672
YLR207W	HRD3	1.11928	0.968585	0.708129	0.991597
YLR301W	HRI1	0.973983	1.05444	1.0291	1.23861
YOR267C	HRK1	0.99507	0.994452	1.10645	1.23323
YOL123W	HRP1	1.22407	1.05762	1.28188	1.72917
YDR291W	HRQ1	1.05959	0.942812	0.542178	1.07349
YPL204W	HRR25	1.10003	0.985747	0.826219	0.97543
YOL133W	HRT1	1.13108	1.13969	0.785	0.901081
YLR097C	HRT3	1.0338	1.00663	0.793025	0.996469
YMR186W	HSC82	0.841275	0.963	0.921739	1.11329
YHL002W	HSE1	1.07811	1.01867	0.817212	1.00217
YGL073W	HSF1	1.12075	0.934636	0.693829	0.892062
YMR288W	HSH155	1.05273	1.0958	0.691696	0.986297
YOR319W	HSH49	1.01053	1.05153	0.425719	0.710757
YKL138C-A	HSK3	1.19861	0.995373	0.695626	0.949055
YKL101W	HSL1	1.01301	1.08148	1.27132	1.0671
YBR133C	HSL7	1.07195	0.907311	0.797113	0.979372
YBR272C	HSM3	1.10303	1.00445	1.15401	1.07788
YOR020C	HSP10	0.836026	0.964236	0.934884	1.01257
YLL026W	HSP104	0.440128	1.03061	1.32801	1.42676
YFL014W	HSP12	1.32596	0.968768	0.648538	0.912564
YJL159W	HSP150	1.22111	0.727646	0.561083	0.71512
YBR072W	HSP26	0.409561	0.683545	1.93252	1.76221
YCR021C	HSP30	0.448971	1.34816	2.27967	1.32831
YDR533C	HSP31	0.928297	0.789689	0.9419	1.02472
YPL280W	HSP32	1.13742	1.01684	1.45706	1.03141
YOR391C	HSP33	1.57952	1.04923	1.02299	1.26609
YDR171W	HSP42	0.658263	1.07965	1.30262	1.37739
YLR259C	HSP60	0.853997	0.894755	0.986285	1.11633
YDR258C	HSP78	0.489439	1.12596	1.1479	1.25991
YPL240C	HSP82	0.655886	0.871856	1.07606	1.34605
YOL068C	HST1	1.03694	0.851746	0.478657	0.945099
YPL015C	HST2	1.1497	0.832339	1.19053	1.09342
YOR025W	HST3	1.0592	0.843405	1.2438	1.02421
YDR191W	HST4	0.939806	1.01345	0.888348	1.5415
YGR223C	HSV2	1.11079	1.0276	0.600125	0.996044
YDR225W	HTA1	1.30995	1.34139	1.30451	1.00379
YBL003C	HTA2	1.19756	1.23148	0.762362	0.976984
YDR224C	HTB1	1.27376	1.23109	0.858137	1.00159
YBL002W	HTB2	1.18701	1.41783	0.834253	0.985581
YHR067W	HTD2	1.07224	0.945543	0.934618	1.02051
YCR020W-B	HTL1	1.07446	1.17351	0.696095	1.38353
YPR033C	HTS1	0.937583	0.952257	1.06722	1.56009
YOL012C	HTZ1	1.15656	1.13547	0.643606	0.923599
YGR268C	HUA1	1.22966	1.04753	0.740588	0.986628
YOR284W	HUA2	1.24241	1.05208	0.585798	0.997714
YNR032C-A	HUB1	1.01313	0.88559	1.01816	0.828598
YML058W-A	HUG1	0.77579	1.00099	0.983743	1.07401
YJR036C	HUL4	1.15768	0.994757	0.396634	0.742011
YGL141W	HUL5	1.23343	0.843845	0.589296	1.01649
YGL168W	HUR1	1.03307	0.807957	0.237619	0.848792
YPL244C	HUT1	1.00346	0.880602	0.921115	1.16637
YER039C	HVG1	1.15104	1.04908	0.67113	1.03485
YFR053C	HXK1	1.19473	0.831474	1.62352	1.73155
YGL253W	HXK2	0.94051	1.23357	1.12287	1.48554
YHR094C	HXT1	1.1232	0.889406	1.14657	1.06126
YFL011W	HXT10	1.82861	1.34835	0.489492	0.515586
YOL156W	HXT11	0.979841	0.939026	2.47966	1.2477
YIL170W	HXT12	0.925796	0.933767	3.60379	1.34972
YEL069C	HXT13	0.996736	0.580733	1.28137	1.2386
YNL318C	HXT14	1.19689	1.14806	2.92482	0.55555
YDL245C	HXT15	1.0127	0.719166	0.893895	0.828411
YJR158W	HXT16	NA	NA	NA	NA
YNR072W	HXT17	0.907994	0.59478	1.36996	1.42655
YMR011W	HXT2	1.25075	0.957145	1.17917	2.84482
YDR345C	HXT3	0.931813	1.28456	1.23765	1.67699
YHR092C	HXT4	0.939094	1.11066	1.1552	2.29624
YHR096C	HXT5	1.55513	1.49981	0.674453	0.935081
YDR343C	HXT6	0.991184	0.63556	1.08829	1.41017
YDR342C	HXT7	1.12318	0.766752	1.19295	1.75942
YJL214W	HXT8	1.08355	0.937677	1.14661	1.5222
YJL219W	HXT9	0.991858	0.937461	2.13636	1.15429
YKL189W	HYM1	1.26253	1.05699	0.475942	0.894898
YEL034W	HYP2	NA	NA	NA	NA
YIR037W	HYR1	1.09453	0.861915	1.29404	0.985573
YOR126C	IAH1	1.02393	0.895907	0.497486	0.909899
YJR122W	IBA57	1.13756	0.992862	0.633794	0.86289
YNL164C	IBD2	0.948552	1.02666	0.574945	0.861578
YIL090W	ICE2	1.16612	1.08772	0.61699	1.02415
YER065C	ICL1	1.12685	1.09945	1.56375	3.04029
YPR006C	ICL2	1.39038	1.0438	0.72769	0.946894
YER078C	ICP55	1.0592	0.975892	1.16906	1.02751
YBR157C	ICS2	1.16222	1.0553	0.888456	1.5417
YJL077C	ICS3	0.972903	0.748677	1.30962	1.16549
YLR099C	ICT1	0.913071	1.06637	0.876319	0.953204
YMR195W	ICY1	0.897573	1.31128	0.806034	1.00408
YPL250C	ICY2	0.400344	1.42036	0.900321	1.13401
YNL037C	IDH1	1.30862	0.988551	1.0485	1.27286
YOR136W	IDH2	1.33025	0.970763	0.910711	1.04878
YPL117C	IDI1	0.832201	0.867742	0.495724	0.9211
YDL066W	IDP1	1.02009	0.841644	1.02659	0.966515
YLR174W	IDP2	1.02445	0.808269	1.17758	1.82795
YNL009W	IDP3	0.953345	1.12828	0.905601	0.828574
YJL146W	IDS2	1.16172	1.06335	0.638411	0.911541
YFL013C	IES1	1.12146	1.04877	0.753181	1.0268
YNL215W	IES2	0.993837	0.928196	0.892907	0.924293
YLR052W	IES3	1.18547	1.1056	0.782039	1.24709
YOR189W	IES4	1.09683	0.885641	0.643769	0.899636
YER092W	IES5	1.27028	0.904533	0.613479	0.810375
YEL044W	IES6	0.921816	0.919523	0.786083	1.04246
YBR159W	IFA38	1.0853	1.0077	1.721	1.18767
YLR223C	IFH1	0.881212	0.986533	0.502074	0.975153
YOL023W	IFM1	1.10519	0.874725	0.630579	1.01658
YFR017C	IGD1	1.01581	0.907254	1.20486	1.1673
YNL157W	IGO1	1.03368	0.995436	0.801866	1.09205
YHR132W-A	IGO2	1.18098	0.909742	0.568731	0.759315
YHR187W	IKI1	1.03689	1.01171	0.710237	1.09943
YLR384C	IKI3	0.952046	0.801789	0.736189	1.0291
YJL057C	IKS1	1.12241	0.91741	0.944045	1.06178
YJR118C	ILM1	1.12551	1.07185	0.950844	1.45741
YBL076C	ILS1	1.0115	0.900627	1.14401	1.63438
YER086W	ILV1	0.998972	0.936206	0.793041	1.30721
YMR108W	ILV2	0.957122	1.13452	1.18007	1.33379
YJR016C	ILV3	0.789965	1.00735	1.0396	1.52976
YLR355C	ILV5	0.692123	0.967103	0.776675	1.15485
YCL009C	ILV6	0.96095	0.880072	0.893945	0.974903
YGR287C	IMA1	1.12574	0.966792	1.11406	1.49164
YOL157C	IMA2	0.814495	1.10649	1.82127	1.57754
YIL172C	IMA3	0.763662	0.935682	1.94651	1.4333
YJL221C	IMA4	0.763662	0.935682	1.94651	1.4333
YJL216C	IMA5	1.1995	0.954071	1.13547	1.38364
YAR073W	IMD1	1.25781	1.20712	0.613606	0.964292
YHR216W	IMD2	1.03535	1.05706	0.565858	0.92432
YLR432W	IMD3	0.86696	1.04269	0.457005	1.13762
YML056C	IMD4	0.813959	0.805782	1.16032	1.15854
YJR094C	IME1	1.10278	1.38186	1.04314	0.623932
YJL106W	IME2	0.939761	0.938529	0.641946	1.03663
YGL192W	IME4	1.15859	1.10219	0.834968	0.992893
YCR046C	IMG1	0.985155	0.939722	0.794006	0.972518
YCR071C	IMG2	1.1531	0.91855	0.636548	0.876217
YLR309C	IMH1	1.04043	0.832249	0.671394	1.04503
YJR138W	IML1	1.10535	0.926108	0.64166	0.923943
YJL082W	IML2	1.04791	0.873651	1.6611	1.5151
YBR107C	IML3	1.13704	0.969542	0.947631	1.10066
YGR031W	IMO32	1.00777	0.93511	0.695616	0.944513
YMR150C	IMP1	1.04955	0.826934	0.769488	0.994833
YMR035W	IMP2	1.12059	0.943266	0.872571	1.08105
YIL154C	IMP2	1.10581	0.979041	0.81133	1.13416
YHR148W	IMP3	0.815828	0.984155	1.06291	1.70727
YNL075W	IMP4	0.910451	1.00948	0.972486	1.13443
YLR413W	INA1	1.4517	0.996501	1.22392	1.36624
YPL099C	INA17	1.04434	0.863417	0.522794	0.942539
YIR024C	INA22	1.0363	0.937048	0.719222	0.979019
YDL181W	INH1	1.22802	0.973536	0.801139	1.01923
YHR046C	INM1	0.965468	1.13334	1.63419	2.60527
YDR287W	INM2	1.06138	0.932331	0.638319	0.889243
YNL152W	INN1	1.06295	1.03181	0.738561	1.05261
YJL153C	INO1	1.36542	0.685778	0.696979	0.993274
YDR123C	INO2	1.03147	1.20038	0.657144	1.13927
YOL108C	INO4	1.1179	1.00086	0.814284	0.826879
YGL150C	INO80	1.09655	0.938444	0.771753	1.14689
YMR204C	INP1	1.19665	1.0435	0.593128	0.9567
YMR163C	INP2	1.06535	0.842694	0.487203	0.895694
YIL002C	INP51	1.11608	0.869566	0.962392	1.25962
YNL106C	INP52	1.16371	0.954372	0.543498	0.93931
YOR109W	INP53	1.24177	0.889633	0.717602	1.04393
YOL065C	INP54	1.12024	1.03625	0.726911	0.90222
YLR095C	IOC2	1.04943	0.922009	0.881544	1.16374
YFR013W	IOC3	1.21746	0.915957	1.24494	1.22777
YMR044W	IOC4	1.022	0.959678	0.70452	1.11078
YHR085W	IPI1	0.827536	1.25362	0.783415	1.13118
YNL182C	IPI3	0.723598	0.881918	1.26825	1.93767
YDR315C	IPK1	1.15065	0.79113	0.449613	1.17754
YPL209C	IPL1	1.19819	1.21344	1.18804	1.53432
YBR011C	IPP1	1.07113	0.912005	0.592478	0.933828
YDR072C	IPT1	0.809946	1.17942	0.635833	1.14475
YPL242C	IQG1	1.15434	0.828836	1.04588	1.49526
YBR140C	IRA1	1.10725	0.797636	0.838092	1.05798
YOL081W	IRA2	0.812858	0.906616	1.11493	1.44418
YOL015W	IRC10	1.16549	1.00255	1.50899	1.10784
YOR013W	IRC11	1.08296	0.908855	0.883268	0.993401
YOR235W	IRC13	1.40876	0.862814	0.392492	0.819307
YOR135C	IRC14	1.46309	1.0342	0.85442	1.10316
YPL017C	IRC15	1.1475	1.05501	0.981066	1.08055
YPR038W	IRC16	1.13434	1.10325	0.764288	1.01852
YJL037W	IRC18	0.934997	0.89614	1.00393	0.79622
YLL033W	IRC19	1.18584	0.968309	0.664037	1.0964
YDR112W	IRC2	1.39417	1.45211	0.940877	1.20833
YLR247C	IRC20	1.13843	0.83678	0.593375	0.936321
YMR073C	IRC21	1.16589	1.04528	0.536434	0.8221
YEL001C	IRC22	1.01108	0.949247	1.15624	1.31555
YOR044W	IRC23	1.08444	1.0903	0.4642	0.77128
YIR036C	IRC24	1.05946	0.850942	1.55165	0.869323
YLR021W	IRC25	0.99629	0.959094	0.759353	1.26409
YDR332W	IRC3	1.07004	0.898263	0.735207	1.04719
YDR540C	IRC4	1.09814	0.871217	1.30658	0.879892
YFR038W	IRC5	1.08367	1.03647	0.637431	1.06479
YFR043C	IRC6	1.05804	1.01289	0.830906	1.05626
YFR055W	IRC7	1.38677	1.09075	1.40273	1.10168
YJL051W	IRC8	0.881284	0.982522	1.45479	1.85312
YJL142C	IRC9	1.09328	0.825967	0.620406	0.973366
YHR079C	IRE1	1.13162	0.978862	0.639699	1.07561
YIL026C	IRR1	1.23679	1.27246	0.971789	1.05549
YKR019C	IRS4	1.01996	0.93067	0.75137	0.911944
YLL027W	ISA1	1.0208	1.10685	0.791677	1.03372
YPR067W	ISA2	1.16331	0.939188	0.485657	0.890246
YER019W	ISC1	1.14483	1.01841	0.862597	0.988335
YER180C	ISC10	0.970616	0.860207	0.571444	0.83458
YER048W-A	ISD11	1.17468	0.936237	0.64054	0.755194
YMR081C	ISF1	1.08496	0.974722	2.42595	1.1637
YPL040C	ISM1	1.14526	0.846228	0.679719	1.08832
YOR155C	ISN1	1.08909	0.986013	0.73731	1.09874
YPR106W	ISR1	1.00686	1.09686	0.662815	1.04378
YNL265C	IST1	1.12595	0.941132	0.622008	0.879955
YBR086C	IST2	1.21324	1.09097	0.693144	1.15166
YIR005W	IST3	1.25405	1.0369	0.430508	0.650146
YPL135W	ISU1	1.0293	1.42258	0.857391	1.00357
YOR226C	ISU2	0.902395	1.01298	0.791696	0.803758
YBR245C	ISW1	1.07421	0.989268	1.22734	1.87473
YOR304W	ISW2	1.08736	0.925711	0.593473	1.12257
YJR050W	ISY1	1.1888	1.03153	0.746313	1.00637
YGL133W	ITC1	0.989168	0.880198	0.779461	0.956553
YDR497C	ITR1	1.16901	0.940967	0.664369	1.03836
YOL103W	ITR2	1.08851	0.903297	0.644185	0.997213
YML068W	ITT1	1.15087	0.897818	1.0231	1.02213
YDR229W	IVY1	1.0518	1.07102	0.84657	0.960134
YDL115C	IWR1	1.04879	0.901906	0.567319	0.875057
YKL032C	IXR1	1.2313	1.1538	0.894395	1.21271
YDR492W	IZH1	0.988906	1.13411	0.490947	0.636237
YOL002C	IZH2	1.14652	1.03864	0.383747	0.523719
YLR023C	IZH3	1.10249	1.08317	0.700294	1.05027
YOL101C	IZH4	1.05056	1.03805	0.149329	0.117333
YGL018C	JAC1	1.13154	0.937843	0.769859	1.04065
YJL073W	JEM1	1.10705	0.814829	1.67686	1.05785
YKL217W	JEN1	0.99491	1.16838	0.895583	1.20986
YER051W	JHD1	1.17701	1.0101	0.561604	0.998883
YJR119C	JHD2	1.12298	0.941762	0.72763	1.15971
YPR061C	JID1	1.12352	1.16813	0.544974	1.11914
YLR331C	JIP3	1.29014	0.98572	0.470757	0.842878
YDR475C	JIP4	1.0286	0.961027	1.16995	1.15268
YPR169W	JIP5	0.946987	0.841825	0.493747	0.980058
YNL227C	JJJ1	0.841406	0.743644	0.514146	0.995637
YJL162C	JJJ2	1.06903	0.966693	0.66066	1.24942
YJR097W	JJJ3	0.909097	1.03548	0.571808	1.31555
YLL057C	JLP1	1.22429	0.802696	1.5554	0.918725
YMR132C	JLP2	1.16881	1.12701	0.798816	1.239
YMR294W	JNM1	1.09403	0.910099	0.710811	0.938068
YJR091C	JSN1	1.27249	1.16811	0.838623	1.15648
YKR038C	KAE1	1.04439	0.928415	0.842016	1.12353
YBR017C	KAP104	1.13429	0.936614	0.824239	1.1733
YGL241W	KAP114	1.14227	1.01778	1.19984	1.49469
YPL125W	KAP120	1.19253	1.05803	0.857422	1.11202
YGL016W	KAP122	1.16067	0.949524	0.751175	1.14203
YER110C	KAP123	0.807933	0.75916	0.836573	1.42238
YLR347C	KAP95	1.11978	1.07349	0.833247	0.978565
YNL188W	KAR1	1.0927	0.823776	0.833835	1.08786
YJL034W	KAR2	0.798793	0.879105	1.26157	1.20976
YPR141C	KAR3	1.09713	1.07992	0.685405	1.37141
YCL055W	KAR4	1.12376	0.941073	0.753991	1.13455
YMR065W	KAR5	1.14075	1.04732	0.652354	0.835846
YPL269W	KAR9	1.04933	0.929664	0.964471	1.27872
YCL024W	KCC4	0.806773	1.1574	1.01257	1.24705
YJR054W	KCH1	1.08778	0.876372	0.909233	1.36932
YDR017C	KCS1	1.09468	0.988527	0.595821	1.05714
YKL161C	KDX1	1.34207	0.337067	1.15876	0.815317
YFR042W	KEG1	1.19875	0.967059	0.731516	1.29113
YDR367W	KEI1	1.0125	0.958765	0.623649	0.774097
YHR158C	KEL1	1.19119	1.17475	0.630147	1.05607
YGR238C	KEL2	1.0716	0.948018	0.705042	1.06005
YPL263C	KEL3	0.869802	0.945162	1.55943	2.22309
YPL145C	KES1	1.27356	0.935577	0.789316	1.20332
YGL203C	KEX1	1.01041	0.931158	0.829037	1.01665
YNL238W	KEX2	1.07342	1.04179	0.71076	1.13549
YIL125W	KGD1	1.29576	0.942952	0.992818	1.13439
YDR148C	KGD2	1.09567	0.93436	0.885644	1.16069
YJL094C	KHA1	1.19972	1.17617	0.621527	1.2577
YHR102W	KIC1	1.17058	0.983265	0.73925	1.00001
YDR122W	KIN1	1.18525	0.929562	0.824255	1.1075
YLR096W	KIN2	1.09044	1.04991	0.573908	0.936267
YDL108W	KIN28	1.04057	1.03995	0.496247	1.05127
YAR018C	KIN3	0.955913	0.913867	0.534791	1.19504
YOR233W	KIN4	1.05358	1.09707	0.801863	1.22357
YCR091W	KIN82	1.21576	1.05091	0.854392	1.3238
YBL063W	KIP1	1.06424	0.93969	0.648934	1.17305
YPL155C	KIP2	1.19683	1.02471	1.15143	1.53188
YGL216W	KIP3	1.10629	0.929413	0.700008	1.01787
YKL168C	KKQ8	1.08883	1.08365	0.768586	1.05364
YDL049C	KNH1	1.20089	1.01181	1.13497	1.2689
YLL019C	KNS1	1.08331	1.09354	0.832271	1.07666
YHR186C	KOG1	1.16961	0.937674	0.50007	1.15018
YNL322C	KRE1	1.09645	1.09005	0.811053	1.04924
YDR483W	KRE2	1.19115	0.90771	0.691453	0.994938
YDR532C	KRE28	1.02206	1.08544	0.65178	1.18949
YER038C	KRE29	1.03404	0.921918	0.645501	0.952413
YNL132W	KRE33	0.718497	0.932671	0.863648	1.57268
YOR336W	KRE5	1.12213	0.900311	0.541393	0.866224
YPR159W	KRE6	1.09044	1.03815	0.637753	1.21374
YJL174W	KRE9	1.07917	1.08603	0.832132	1.08925
YNL308C	KRI1	0.752691	0.876921	0.69449	1.10136
YCL059C	KRR1	0.730761	0.943842	0.777332	1.46656
YDR037W	KRS1	0.922898	1.11869	0.965214	1.57837
YNL024C-A	KSH1	1.05598	0.991451	0.591281	0.827073
YHR082C	KSP1	1.08103	0.887919	0.790985	1.06747
YGR040W	KSS1	1.03103	0.991467	1.02978	1.20377
[truncated: 4,715 more rows]

## Sheet: pvalues
Table S5 - RNAseq pvalues
gene_name	SDC_Exp_pvalue	RM_Exp_pvalue	SDC_D7_pvalue	RM_D7_pvalue
AAC1	0.851483532854484	1	0.000445109768474138	0.0929458031483173
AAC3	1	1	0.273521532035469	0.109610577071756
AAD10	1	1	0.0481872634952497	0.185398126803221
AAD14	1	0.604877489139823	0.0256234045397651	0.76317375617905
AAD15	1	0.0472775735170641	0.0759082796569261	0.243010035740447
AAD3	1	0.314150780786411	0.107581494522933	0.215314120490532
AAD4	1	0.698876284069988	0.0259680431991794	0.290510091573814
AAD6	1	0.256670906970316	0.000170142447703419	0.0517363594086212
AAH1	1	1	0.0326062023863565	0.00373684890045828
AAP1	0.559946882486053	1	0.003404372167708	0.0517559933633911
AAR2	1	1	0.0161789213465604	0.48592922272326
AAT1	1	1	0.045798724185395	0.0149464688331745
AAT2	1	1	0.0150161212887979	0.0153002319835976
ABD1	1	1	0.00994574698618814	0.0211118282851016
ABF1	1	1	0.010655627964608	0.0195693812066638
ABF2	1	0.549581135721479	0.00598971816677566	0.0023433067255453
ABM1	0.906543983903768	1	0.623496525545158	0.367486328582364
ABP1	1	1	0.000831996205653217	0.138072295013158
ABP140	0.70704828435744	1	0.0457836927782041	1
ABZ1	1	1	0.0197692382925099	0.0849524895521287
ABZ2	1	1	0.120273230597151	0.0693170853335822
ACA1	1	1	0.00102260103232358	0.156267748446983
ACB1	1	1	0.0241280856794611	0.00137752504590273
ACC1	1	1	1.3932597945017e-05	0.000129791056443261
ACE2	1	0.853132352442458	0.0282964635306189	0.0145266398872101
ACF2	1	1	0.0472409246174777	0.151129433828891
ACF4	1	0.947764311046542	0.0559035383737813	0.293145913071219
ACH1	1	0.258239538599894	0.000282266224908736	0.000129925151733225
ACK1	1	0.427676181116251	0.00270961510793366	0.0835772318580936
ACM1	1	0.743065578736888	0.225619155831369	0.0711787550125169
ACO1	1	1	0.00262087062845987	0.049385723227587
ACO2	1	0.418158112616515	0.0256059813955859	0.00352793675333253
ACP1	1	1	0.0122232634221599	0.0655241441295355
ACS1	1	0.586413463806677	0.0113318628643139	0.0182072999778371
ACS2	1	1	0.000945655599197772	6.34885462492547e-05
ACT1	1	1	0.00321833504226015	0.00288730055191006
ADA2	1	1	0.0186968232725986	0.165520757475786
ADD37	1	1	0.0234885358776689	0.00106240627732243
ADD66	1	1	0.0682341881541192	0.219675538467702
ADE1	0.218381948255839	1	0.00189771608575355	0.025609422143195
ADE12	0.268271801761623	1	0.0315561909062456	0.00533655568609988
ADE13	0.1666479761039	1	0.00408568797612163	0.0251324052049086
ADE16	1	0.640704894163259	0.0145765172272669	1
ADE17	0.108665549303711	1	0.00195968686015239	0.020039722835464
ADE2	0.057015397851976	1	0.019423093757707	0.0256171941521291
ADE3	1	1	0.296736993385828	0.0123458228892579
ADE4	0.3179435192962	1	0.00908152940690374	0.0114857723223909
ADE5	0.245591118435547	0.638864947732788	0.000785762538065678	0.0730705788638172
ADE6	0.295244295752894	1	0.000361267056116085	0.0227863761185435
ADE8	0.126563059500664	0.679655943703914	0.000761792164342771	0.0231622999928512
ADH1	0.584257464696593	1	0.209768197556253	0.00765155783620521
ADH2	0.592818462220547	0.687417252575941	5.43422495803155e-05	0.00708258501645801
ADH3	1	1	0.000790649919056491	0.00606469816392797
ADH4	1	1	0.00128595997237341	0.00479112624128395
ADH5	1	0.500735520974839	0.0264156278950727	0.0212033139668206
ADH6	0.686267950132589	1	0.00159516548517997	0.00389501373372777
ADH7	1	0.463646188666209	0.0609498069123733	0.183444830013903
ADI1	1	0.520761011813168	7.2544965826057e-05	0.0814303774574147
ADK1	0.609971207972943	1	0.00188810103498259	1
ADK2	0.563124373740133	0.49979498967106	0.248455266257395	0.0164575877757211
ADO1	1	1	0.0526778028728109	0.12031120242063
ADP1	1	1	0.00778160968189161	0.0386244057132795
ADR1	1	1	0.362418507435307	0.0341402882218335
ADY2	1	0.422783711546418	0.0617905926104379	0.00176747919619536
ADY3	0.739260706863449	0.761959968200913	0.0178702044097952	0.0215726411354649
ADY4	1	0.677793629446728	0.000496692492825654	0.167802671785512
AEP1	1	1	0.00059546428179935	0.353308129110505
AEP2	1	0.72087197913661	5.2542008391766e-05	0.011178907631622
AEP3	0.738857013810742	1	0.000722527010362643	0.00648632942248421
AFB1	0.633429104839986	0.304133351855308	0.418758232592024	0.333458588662637
AFG1	1	1	0.0376110925096474	0.0475791117073256
AFG2	1	0.786038461702322	0.133342829297069	0.0598180590041941
AFG3	1	1	0.0478859380547233	0.026416203608433
AFI1	1	1	0.000220979536772694	0.028343613721159
AFR1	0.945520039008521	0.109639752101588	0.016089587924595	0.000688221010803507
AFT1	0.179161271240694	0.133531962616667	0.009512149292748	0.44632473430984
AFT2	0.238643583288177	1	0.0290036656388712	0.0657320989055661
AGA1	1	0.734386717640472	0.0820751658426595	0.501508743805424
AGC1	0.606288655638993	1	0.0683736499942207	0.091111509472835
AGE1	0.519925544291079	0.351126515204298	0.000867659559538721	0.00479893182729426
AGE2	1	1	0.0313772874143446	0.00478720226879196
AGP1	1	0.233961169631519	0.00639953268988823	0.0193798088488009
AGP2	0.830255854886863	0.681506109259727	0.0161463852781077	0.0306917305795237
AGP3	0.672842879311773	1	0.00178911993878772	0.233420705629976
AGX1	1	1	0.000478956583084124	0.00531117922587079
AHA1	0.0913865189563603	0.407580655330528	0.0519618542278843	0.235204946482669
AHC1	1	1	0.00370073304245375	0.028674276993918
AHC2	1	0.520042867646394	0.00560906195586193	0.152972271371894
AHP1	0.418461453824452	1	0.0693033962608602	0.0186175025109384
AI1	0.630716438252658	1	0.329006932628806	0.464037835997657
AI2	3.45423436566295e-05	3.46027399560211e-05	1.41692286828208e-06	8.74082843425908e-07
AI4	1	1	1	1
AI5_ALPHA	0.38361522642019	0.138556527475324	0.583096503386152	0.20105923069115
AI5_BETA	0.27182310101005	0.300939632187387	0.327764871107896	0.256527609130843
AIF1	1	1	0.000949297450847285	0.194159671995558
AIM1	1	0.399031116640439	0.00173825393181053	0.303340721815068
AIM10	0.687269368830501	1	0.000178501779360022	0.189806949335607
AIM11	1	1	0.00372884511676461	0.0246754417339151
AIM14	1	1	0.000157115210552338	0.0271945941854733
AIM17	1	0.337896282282814	0.00107308154037197	0.00144832379865532
AIM18	1	1	0.000105216976385551	0.015822327533456
AIM19	1	1	0.00838237057405685	0.0165741197200572
AIM2	1	1	0.00293118106963389	0.0714756090104658
AIM20	1	1	0.404579460437112	0.412202877908245
AIM21	1	1	0.0135366553858154	0.0677298941164642
AIM22	1	0.807012683526328	0.383654660460926	0.306526873474291
AIM23	1	1	0.0185110769917398	1
AIM24	1	1	0.000233676386132051	0.016631491727982
AIM25	1	0.616041605138825	0.00167045272714844	0.00299950561778908
AIM26	0.802941243367366	1	0.638518275550037	0.343213590965151
AIM29	0.698307580451684	1	0.00757714918800597	0.0145122819746446
AIM3	1	1	0.0178468809693942	0.0637203049929109
AIM32	1	1	0.00060782027859215	1
AIM33	1	1	0.211113559953533	0.112855855424112
AIM34	1	0.247723411339498	0.000336110303368664	0.00143470936692542
AIM36	1	1	0.000143182541611865	0.0142145244097296
AIM39	1	0.261625502534003	0.00597636938465869	0.0468380464069059
AIM4	1	0.796939350679391	0.0729744201071079	0.238306202808258
AIM41	1	1	0.0255082187965231	0.0194123301286727
AIM44	1	1	0.063324934618492	0.0786485864507375
AIM45	1	1	0.000114017625209799	0.000291380916890233
AIM46	1	0.483960317566478	0.00502768634580916	0.000427553366039772
AIM6	1	1	0.0310232082894906	0.968362843277226
AIM7	1	0.780568916616842	0.0165923430942121	0.0742711007629802
AIM9	0.492519601306074	1	0.0419635442026093	0.0319413246301073
AIP1	1	1	0.0135240303025208	0.0485169244683621
AIR1	0.517530295343093	1	0.0592844440141424	0.215633737674203
AIR2	1	1	0.00475656562998975	0.103000964337447
AKL1	1	1	0.0280903565703885	0.0650816020656166
AKR1	0.303610141917294	1	0.00851449305250265	0.00283294815059119
AKR2	1	1	0.103420838634648	0.0831393194601533
ALA1	1	1	0.0106005006056371	0.0360007018773753
ALB1	0.502305383899383	1	0.29845330733702	0.0984891188115963
ALD2	1	1	0.000995626961222613	0.00835452505993954
ALD3	0.285569290864892	0.579729950477207	0.00300021748457399	0.0297292647984827
ALD4	0.808305047311013	0.161217349685242	0.000879081406017675	0.0160476726460436
ALD5	1	0.0752294059329542	0.0228104226487042	0.104649837051644
ALD6	1	1	0.0121931477520265	0.000173484343666214
ALE1	1	0.43524386982364	0.00710983242913906	0.0112400973408461
ALF1	0.204220660301636	0.397454994590253	0.0495239772894589	0.249417042114681
ALG1	0.668425910084754	1	0.0672386012604202	0.128280242583949
ALG11	0.470149565426355	1	0.0671995027974115	0.0424024356559057
ALG12	1	1	0.0020581375847874	0.159087570555661
ALG13	1	0.958404285853037	0.0204495922058216	0.00692008958982088
ALG14	1	0.527389826281128	0.00489649505993786	0.0461235837581283
ALG2	1	1	0.0102243725990071	0.23276555216283
ALG3	1	0.330770233278089	0.0330940083488982	0.0242838652635101
ALG5	1	1	0.206001812151009	0.457210806139798
ALG6	1	1	0.0141413771996643	0.54740669513633
ALG7	1	1	0.018986065144192	0.0144545042813703
ALG8	0.296269487788616	1	0.108306681190684	0.152580037285609
ALG9	1	0.22344605502728	0.00680038514653753	0.0335696508972739
ALK1	0.140679297532698	1	0.00287065604104238	0.179497340669633
ALK2	1	0.504328943883268	0.0762542132548545	0.00371656912142709
ALO1	1	1	0.00649922433766352	0.139846887209286
ALP1	1	0.478905805297915	0.00839993503017739	0.0684206997555624
ALR1	1	1	0.0099521466396895	0.191077728401439
ALR2	1	1	7.24876588251927e-05	0.234197045547473
ALT1	1	1	0.000166842638536741	0.0127734581650875
ALT2	1	0.0628150120395404	0.0929366881576657	0.103815612731996
ALY1	0.570475140924682	1	0.00378919421243797	0.0993267459571061
ALY2	1	0.689220324383443	0.00629499771308352	0.0839390338687756
AMA1	0.562352504539539	0.756739769236032	0.0288602054756812	0.0200833815573144
AMD1	0.52666109876106	1	0.0700046196775521	0.109982633488612
AMD2	1	1	0.0179369294135802	0.0910453327280475
AME1	1	1	0.00058408208918937	0.0534569020848172
AMF1	1	1	0.0341171431178554	0.0310234815549324
AMN1	0.714168647595928	0.314035066424284	0.099044085360638	0.226487386832452
AMS1	1	1	0.00986079832001184	0.131852016132293
ANB1	0.0450054321725187	0.00448056209990335	0.263500267292183	0.293689721686115
ANP1	0.416604355674014	0.467468623616767	0.0727611371709808	0.0034627012555178
ANR2	1	0.939361746316821	0.250811591983123	0.0194449730234644
ANT1	1	1	0.00220724565142678	0.0202154448413294
AOS1	1	1	0.00573254193494466	0.197059533354076
APA1	1	1	0.000299045575895309	0.00113866766124913
APA2	1	0.430902429472595	0.0234950754669941	0.00295184198058341
APC1	1	1	0.00990205116448915	0.0717477486262967
APC11	1	1	0.00255202436722415	0.00135345820769953
APC2	0.371819317253201	1	0.000114505861606084	0.319385760359956
APC4	0.644425206575907	1	0.155423573344416	0.128437381526498
APC5	0.739010432835453	1	0.279766533633248	0.733910125378107
APC9	1	1	0.0132084123851249	0.154592590358911
APD1	1	0.64711998740032	0.0055728832982083	0.0206460080386703
APE1	0.591247059908169	1	0.0201546903170754	0.166081008677368
APE2	1	0.596111980442935	0.000619614931624482	0.00247976727559155
APE3	1	1	0.00315806802117914	0.0641053814492234
APE4	1	1	0.0348834371749513	0.0962601824807908
API2	1	0.881115835981852	0.05862557845053	0.421667521451128
APJ1	1	1	0.000974787039219865	0.000278380867955654
APL1	0.438922924236127	1	0.000715071908632216	0.0314096997367824
APL2	1	1	0.0105115024398165	0.0930891096578917
APL3	0.438215031525511	1	0.0161757341640844	0.122232585673934
APL4	1	1	0.0958966110258399	0.0966233132718206
APL5	1	1	0.000837313452569219	0.00659136601818055
APL6	1	1	0.177422547410119	0.00114873138085517
APM1	1	1	0.083947987674456	0.0878076914031617
APM2	1	0.266684998176606	0.0121697361762547	0.125832886510059
APM3	1	1	0.0301686447885266	0.0951222431583763
APM4	1	1	0.0100590569954189	0.298061697386536
APN1	1	1	0.0681914156800566	0.190641158798759
APN2	1	0.471702783341035	0.0727253592226725	0.186296146450738
APP1	1	1	0.00844776326138242	0.00724971738401168
APQ12	1	0.242130416661414	0.12200013698895	0.24006109288317
APQ13	0.843057812115181	1	0.00738995845787981	0.248531814053591
APS1	1	1	0.0336234962695434	0.163728099242523
APS2	1	1	0.0114124782076538	0.0440948963567436
APS3	1	1	0.0240430843066672	0.0382344524192916
APT1	0.371990617607027	1	0.0815505946384331	0.180491825758734
APT2	0.641080979654948	1	0.089612752534736	0.558342378848235
AQR1	1	0.432894107186612	0.000893306639544121	0.176854114349704
AQY1	1	1	0.000890618144793172	0.015278856437863
AQY2	0.534884885334234	1	0.0873794317306608	0.153221514412609
ARA1	1	1	0.0412968428858409	0.500565292344378
ARA2	1	1	0.00171529684189297	0.0590220848786731
ARB1	1	1	0.00158513794292609	0.171420994913787
ARC1	1	1	0.00230751305456197	0.0428882169780558
ARC15	1	1	0.0166100539520055	0.0352833809414615
ARC18	0.544286144527003	1	0.00859313079806092	0.0954578685943078
ARC19	1	0.759953356564267	0.056036085825765	0.0597483068391009
ARC35	1	1	0.010393624258424	0.00486816488926154
ARC40	1	1	0.00169337344686381	0.00270334559423038
ARD1	1	1	0.0111198149327876	0.0808697110044489
ARE1	1	1	0.0285140602465346	1
ARE2	1	1	0.00199602761702902	0.0291549616604347
ARF1	0.867905141064782	1	0.0190343579667105	0.142146308047689
ARF2	1	1	0.00209239453685677	0.0228115461981212
ARF3	1	1	0.0508415808007807	0.0104873774496122
ARG1	0.225266921879266	1	0.0353611040572919	0.0412019182555547
ARG2	0.773821414613701	1	0.0622057509993893	0.0155834416000266
ARG3	1	1	0.0252032589498465	0.00738286950273958
ARG4	1	0.492938714202882	0.000889695071657475	5.44548639071974e-05
ARG5	0.7375301510115	1	0.0894642368845546	0.6524767636548
ARG7	1	0.0980459836073306	0.0601776534754896	0.00127876486250044
ARG8	0.821695158937211	1	0.0203603182280421	0.0628795089221117
ARG80	1	1	0.00346852970829253	0.054910148744014
ARG81	0.103833661844705	1	0.0238079376068035	0.0267452567245932
ARG82	1	1	0.0812413092824973	0.050562874181905
ARH1	1	1	0.0348534435964914	0.000364320757369718
ARI1	1	1	0.145807402395404	0.000453480647023496
ARK1	1	1	0.00340824514957669	0.0698607620557165
ARL1	1	1	0.0202402063173513	0.20333024451087
ARL3	1	1	0.0915376366000095	0.294234302577215
ARN1	1	1	0.0308600622099762	0.135381743533953
ARN2	0.409585449644793	1	0.000100144086090281	0.193310131748271
ARO1	1	0.528951063962798	0.0159046235418788	0.000103350479156554
ARO10	1	1	0.047267617345303	5.12665031912729e-05
ARO2	0.556819961763219	1	0.0512724664086507	0.0153436626277529
ARO3	1	1	0.0145734259437934	0.00136499799326023
ARO4	1	1	0.0120420675312358	0.00136577811949222
ARO7	0.887464082208279	0.471932325720355	0.131178383079065	0.296159779117589
ARO8	1	1	0.117985104827548	0.0047850027165436
ARO80	1	1	0.0152881617972065	0.0665079854554377
ARO9	0.123586188348945	1	0.0194473854603612	5.34286952560595e-05
ARP1	1	0.662463332198279	0.170570626616542	0.0248218471730929
ARP10	1	1	0.0504634687022015	0.304985011913816
ARP2	0.509844182852082	1	0.0153536127061257	0.0264841560852478
ARP3	1	1	0.0165071773401997	0.0828700709415297
ARP4	1	1	0.00380341930569257	0.0887281236597715
ARP5	1	0.8413192042112	0.0207908854155779	0.0389455314428852
ARP6	1	1	0.095756372442752	0.265025684117702
ARP7	1	0.690665839513252	0.00280081249274981	0.00691865057802901
ARP8	1	1	0.0518766941498223	0.0566719912408688
ARP9	1	0.632864090738493	0.0280220492688517	0.210493606095336
ARR1	1	1	0.0191078933457693	0.139696998153057
ARR2	0.924172905945033	1	0.246129543566143	0.143793525991635
ARR3	1	1	1	1
ART10	0.778772897958595	1	3.7743304083643e-05	1
ART5	1	1	0.0067248107667384	0.0173600412222455
ARV1	1	1	0.41799609926424	0.215268508605481
ARX1	0.601080419666217	1	0.00823168399529395	0.011298584987651
ASA1	1	0.910220427346211	0.00782053718195987	0.0759340289755512
ASC1	1	1	0.000731526513213353	0.0548379366235478
ASE1	1	1	0.0147035093421626	0.0753003506088923
ASF1	0.547829408848085	0.142809550450217	0.00279966567918048	0.0201006068488369
ASF2	0.559893557841795	1	0.000317283933369982	0.00276811336883753
ASG1	1	0.515845159375022	0.00509010067022438	0.0478280066735702
ASG7	1	1	0.475414982885671	0.380213055425245
ASH1	1	1	0.241996455592953	0.198114117325539
ASI1	0.441401938934043	1	0.00904089277886834	0.00567214230731289
ASI2	1	1	0.00128150306851351	0.00367827402234726
ASI3	1	1	0.0211589133780864	0.105669129999377
ASK1	0.313007405839458	1	0.013523668783174	0.171272250246907
ASK10	1	0.485340961097496	0.0270566947538831	0.309393954123487
ASM4	1	1	0.00101030796947744	0.0524712855861396
ASN1	0.428133937563615	0.0304075746319994	0.00145369446551112	0.000606583605048312
ASN2	1	1	0.0103764604829123	0.00568863175760679
ASP1	0.360711472559348	0.223693534104042	0.115111459057511	0.130675192489528
ASR1	1	1	0.0262275703618316	0.0231115751823041
AST1	0.963096970026276	1	0.101020084132104	0.0865898782958694
AST2	1	0.300385232308683	0.0760287914583677	0.0378265983097279
ATC1	1	1	0.0361642698801466	0.161635745059281
ATE1	1	0.298466165325623	0.00378482552071701	1
ATF1	1	1	0.021210011409694	0.0799042095495375
ATF2	1	0.397104009878436	0.154005191007966	0.165164119894226
ATG1	0.142991947983211	1	0.0219308485210385	0.00159368575992624
ATG10	0.86786038877656	1	0.109347147079958	0.273523474699554
ATG11	1	0.48008481979646	0.0118915818261983	0.0532063582497905
ATG12	1	1	0.0023544168361637	0.249097600046391
ATG13	1	1	0.0389625642812934	0.0317503599925808
ATG14	1	1	0.0116175753110929	0.273790854665493
ATG15	0.196963804004108	0.471082179450539	0.00817342557248677	0.0475488516708689
ATG16	1	1	0.106032571680985	0.313683121856926
ATG17	0.291267819412229	0.682796490485061	0.0681407128448297	0.300089890105846
ATG18	1	1	0.0724481733626158	0.0379131942037062
ATG19	1	0.256027423992332	0.00221720854270366	0.0257611733253226
ATG2	0.33442130461178	1	0.000169708240266387	0.105363085714487
ATG20	0.350123625900727	0.575440609321149	0.00104647953279524	0.0449715113152624
ATG21	1	0.700784474702937	0.0304210877957744	0.105834857227899
ATG22	0.531606847687715	1	0.0166018451121169	0.000795102920481784
ATG23	1	1	0.00289197371652785	1
ATG26	1	1	0.017594472434117	0.0391897538465232
ATG27	1	1	0.0192277395502858	0.122476686304681
ATG29	0.27246325716569	0.0670042654920805	0.0325530668804818	0.104969170696857
ATG3	1	1	0.000635761261023004	0.00194718039750963
ATG31	1	0.465463821268435	0.0132848686658876	0.0273102341431808
ATG32	0.656939007894564	1	0.0150155766489816	0.051901860418792
ATG33	1	1	0.00160012125827517	0.0312427640200084
ATG34	1	1	0.017663407952309	0.044309593898803
ATG36	1	1	0.00248883598370386	1
ATG38	0.27189796570507	1	0.00203520309208861	0.25127494635766
ATG4	1	1	0.000838207640683969	0.184971730126735
ATG5	1	1	0.00260379600293949	1
ATG7	0.844731915434042	0.444259651980774	0.00284711661545544	0.049078106118287
ATG8	0.531388076736411	1	0.0283313316932534	0.00568537178162206
ATG9	0.634042674403607	1	0.000658257933702112	0.202690613791289
ATH1	0.462798245550728	0.432184013663149	0.00972764648522696	0.0375651119660481
ATM1	1	1	0.10343893942493	0.0748588932538722
ATO2	1	0.578136932721344	0.230980385053532	0.263078767491466
ATO3	1	0.331540818393194	0.00118042767879922	0.00158482830391487
ATP1	1	1	0.0005750586362264	0.0530480476288295
ATP10	0.218135997488986	1	0.000844242599999927	0.14210115161763
ATP11	0.514026172649197	0.594553036869389	0.0340253018793287	0.00231304467940477
ATP12	1	0.657334187777444	0.161707959527748	0.21883154075961
ATP14	1	1	0.00938081416216868	0.114510931493098
ATP15	1	0.663791419392178	0.0242279252165933	0.0640272017135934
ATP16	1	1	0.00387158777921964	1
ATP17	1	1	0.022101460905902	0.161008047591073
ATP18	1	0.842575581193544	0.00536348439098311	0.268814624365146
ATP19	1	1	0.190073670194401	0.0756671861430204
ATP2	1	1	0.00305926535105491	0.0457037957445184
ATP20	1	0.638402062538955	1	1
ATP22	1	1	0.000814479516390151	0.0219412273310001
ATP23	1	0.467859637828541	0.00566643645110035	0.188742970199811
ATP25	1	0.373118898721286	0.000778496402105493	0.0254417937724212
ATP3	1	1	0.0517814959125369	0.0300812818624994
ATP4	1	1	0.00170809870895266	0.027596426245807
ATP5	1	1	0.0231402644889686	0.561973429364171
ATP6	1	0.403434923744467	1	0.255101532047
ATP7	1	1	0.0975880396239827	0.119985226720976
ATR1	1	1	0.000428953571910854	0.00285951458255772
ATS1	1	0.500790774169163	0.08823793778352	0.0992030259013684
ATX1	1	0.472697075107908	0.0196662978784111	0.0959171740918137
ATX2	1	1	0.399486991224035	0.334120997306786
AUA1	0.290911341915015	0.371111693655073	0.000274141669668252	0.705674123266167
AUR1	1	1	0.0365617203252075	0.00458990538771875
AUS1	0.531117816681992	1	0.12366771664229	0.0132196643945966
AVL9	1	0.660701637986761	0.0243296933544979	0.0438301162716619
AVO1	1	0.460516282168247	0.000985546864825243	0.0830710773211298
AVO2	1	0.527119206675239	0.00202506503469962	0.0569224959204881
AVT1	1	1	0.0525129487681646	0.198852601673362
AVT2	0.774725470255538	1	0.312551437877201	0.197672727547717
AVT3	1	1	0.0141681991246324	0.0436020719223623
AVT4	0.515094914038446	0.599011611715043	0.00767506780966235	0.00450262799200357
AVT5	1	1	0.0374182141817283	0.178582801742169
AVT6	1	1	0.074540054412852	0.0123283068755557
AVT7	1	0.613438790716869	0.0017015881976416	0.00092019045025334
AXL1	1	1	0.0108304200400677	1
AXL2	0.558040654701243	0.317230179302672	0.469178488370149	1
AYR1	1	1	0.0181602287088842	0.310721050337697
AYT1	0.295430179216886	1	0.618157377767142	0.25396490736551
AZF1	0.300967106825722	0.251448968123559	0.000815857121248665	0.00472845303099685
AZR1	1	1	0.115786973402757	0.485244348543497
BAG7	1	1	0.0150334525092935	0.0157085588329189
BAP2	0.210488520075145	0.133089695710446	0.000136546908577875	0.000527684595211335
BAP3	1	1	1.01148108553826e-05	0.00288835138882567
BAR1	1	0.382395059701658	0.0170576537392126	0.532897873541382
BAS1	0.152733803977156	0.303017843364703	0.00285410682662243	0.0662471482748671
BAT1	1	1	0.00721814496017373	0.00176065589556695
BAT2	1	1	0.00659874781717761	0.0869591813506075
BBC1	1	1	0.0113334547251473	0.047397522265175
BBP1	1	1	1	1
BCD1	0.148205971488599	1	0.0323631765051737	0.108638018573616
BCH1	1	1	0.029611786476854	0.141670858753542
BCH2	1	0.8385004457953	0.0421191354888085	0.294234387126714
BCK1	1	1	0.0293636616263588	0.0418473083908429
BCK2	0.620514080531801	1	0.00171299252759127	0.003131841716751
BCP1	1	1	0.00133759622014194	0.222063675126533
BCS1	0.221283841729383	1	0.0209971060417628	0.0299874354497958
BCY1	1	1	0.000646698455068701	0.280819124408676
BDF1	1	1	0.00715753865150203	0.0478752992963201
BDF2	1	0.0736347067177903	0.0164571627675077	0.0710303972465069
BDH1	1	1	0.000512180749747081	0.00140603804507365
BDH2	0.576806990961925	1	0.000535095078154395	4.63579491752634e-05
BDP1	1	1	0.00579873935480496	0.0773643086150111
BDS1	0.762485593757412	1	0.0314794421593476	0.487682906007404
BEM1	0.577146925761711	1	0.00444381436496705	0.109441008044886
BEM2	1	0.706646175145603	0.00151580949252755	1
BEM3	1	1	0.0026110420879398	0.0356074744369738
BEM4	0.217322621651987	0.743307267376804	0.0816388868957906	0.30375442314246
BER1	1	1	0.0932580275597201	1
BET1	1	1	0.0215275643178635	0.0788572795394951
BET2	1	1	0.0139619493649123	0.10694634858234
BET3	1	1	0.000921608058495855	0.00102417137206872
BET4	1	0.188990360779097	0.105382721941286	0.0182438773803032
BET5	1	1	0.431030961783447	1
BFA1	1	1	0.0130767838148228	0.0144561987098377
BFR1	1	1	0.00197104862694899	0.111393121166003
BFR2	0.55212143480964	1	0.115156334893398	0.0171879932496783
BGL2	1	0.205722279761181	0.0934444678004376	0.0426841045446412
BI2	0.431209475112612	0.137899040396863	1	0.253499199322573
BIG1	1	1	0.372969812242518	0.17105658364519
BIK1	1	1	0.0464385203986783	0.0244548961795574
BIL1	1	1	0.126272005146935	0.0250819961349562
BIM1	1	1	0.412968061391529	0.136811618186749
BIO2	0.682068525181163	0.281549338031727	0.0290446563584776	0.00199342911487488
BIO3	0.143518603583926	0.285584946911215	0.0677106158037532	0.126761869194777
BIO4	1	1	1	0.290391044392806
BIO5	0.615145454015948	0.185179889429388	0.417915458368779	0.0403204327882468
BIR1	1	1	0.0142708550652576	0.135720358492261
BIT2	1	1	0.0517860383536149	0.108145846444968
BIT61	1	1	0.319858208502272	0.389231483523544
BLI1	1	1	0.0554525364953102	0.0557641660761389
BLM10	1	0.552421508720859	0.000575995941723945	0.00968992718547044
BLS1	0.90525983812081	1	0.00173040390610447	0.0670119464754812
BMH1	1	1	0.00203146383111819	0.0243744606040063
BMH2	0.299020091920868	1	0.000727757803917277	0.00669013657173904
BMS1	0.225677029086228	0.394934730703328	0.00811068328627757	0.00853772463737961
BMT2	1	0.433592819620729	0.14509224467082	0.497477272724397
BMT5	0.220180512404847	1	0.229830164227809	0.013675120419558
BMT6	1	1	0.00328407183487168	0.148579327533408
BNA1	1	0.813752297986549	0.00876794783720317	0.00104982402022718
BNA2	1	1	0.324374828288761	0.473325520875444
BNA3	0.0355081191224042	1	0.0164461239562947	0.0699741379350079
BNA4	0.508721430619081	0.387619898581961	0.000140829095502253	0.00014090779962167
BNA5	0.0868634151954733	0.687306289452656	0.000763212102621196	0.00686445360522412
BNA6	0.550050350421369	1	0.00043348559381708	0.000913812682643788
BNA7	1	1	0.894979477986083	0.345584785720108
BNI1	1	1	0.00357604961372541	0.0757159137817671
BNI4	1	1	0.0254035451820581	0.137204254302255
BNI5	1	0.613270585152773	0.00560458875664509	0.223179534039438
BNR1	1	1	0.069525602509181	0.00759299972331976
BNS1	1	0.446277053196961	0.0603772921802055	0.319442099957857
BOI1	1	0.132638057724344	0.0290896032761706	0.0991153603237849
BOI2	1	1	0.0110525446226941	0.0598183229176657
BOP2	1	0.641935021477062	0.290791477843852	0.00353150186171136
BOP3	0.171876998859737	1	0.0507280972202169	0.15076698092036
BOR1	1	1	0.0315012518948124	0.724450949506424
BOS1	0.531692399985565	0.54668697745363	0.0422755904778507	0.0204011923102103
BPH1	1	0.563677833010056	0.0281467161631674	0.0135120004910623
BPL1	0.64778035146407	1	0.0335987145985867	0.160290724591418
BPT1	1	1	0.0992451699696576	0.0397209931852452
[truncated: 5,863 more rows]

## Sheet: SDC_Exp_Candidates
Table S5 - Shortlisted candidates SDC_Exp (>2 fold expression change)
[truncated: 9 more rows]

[truncated: 4 more sheets: RM_Exp_Candidates, SDC_D7_Candidates, RM_D7_Candidates, GO enrichment]
